# Supplementary material for: Natural variation in the irld gene family affects starvation resistance in C. elegans
Source: bioRxiv preprint, doi:10.1101/2021.06.07.447366, version 2 (2022-05-11)
Supplement: Data S1 [file 447366_file02.xlsx]

## Sheet: README
Data S1: MIP-seq processed data
Sheets included in this file:
TraitValues: Slope and PC1 trait values for each strain; inputs for GWAS
MIPgen_output: Output from MIPgen to generate MIP sequences. "mip_sequence" is the full sequence of the MIP, and "mip_name" is the name used for each MIP that is carried through the downstream analysis.
MIPFilter_pilot: Read counts for 411 MIPs in MIP-seq pilot for 103 strains. The final column indicates whether data from each MIP was included in the analysis for the starvation resistance MIP-seq experiment.
MIP_Primers: PCR primers, sequencing primers, and indices used for MIP-seq library preparation and sequencing. This table is part of Hiatt et al., 2013 supplementary material.
StandardCurve_Counts: Count data for standard curve in Fig 1F from 7 strains (CB4856, DL200, ED3077, JU258, JU561, JU1652, and N2)
All subsequent sheets are MIP-seq results for individual conditions and replicates, with counts for all individual MIPs. This data was used to determine Slope and PC1 trait values. Each sheet is named with named with Rep number (1-5), followed by the days of L1 arrest (1, 9, 13, or 17) and whether it is a baseline sample or recovery sample. The day 1 baseline samples were collected as starved L1s…

## Sheet: TraitValues
STRAIN	Slope	PC1
CB4854	-0.0235004	-0.364669
CB4856	0.110989	3.3415
CX11254	0.0413271	-2.93444
CX11264	-0.0993935	-3.75913
CX11271	-0.150174	-4.57592
CX11276	-0.00900208	3.41315
CX11285	-0.00276089	0.0870902
CX11307	0.00897467	3.13604
DL200	0.0169852	3.91801
DL226	-0.117728	-2.97173
DL238	0.1575	8.00562
ECA189	0.0540754	2.62691
ECA191	0.0155594	-1.62915
ECA36	0.0385309	-0.725183
ECA363	-0.040138	0.0480494
ECA369	0.0102266	3.68481
ECA372	-0.0721836	-0.849017
ECA396	-0.0676182	-0.368263
ED3017	0.00804207	-0.149424
ED3049	-0.0329663	1.34041
ED3052	-0.088647	-1.64294
ED3077	0.100582	6.19041
EG4724	0.0608543	2.11257
EG4725	0.13304	9.06887
GXW1	-0.0456013	-0.146275
JU1212	-0.0712107	-0.365242
JU1400	-0.107838	-3.9475
JU1581	-0.113611	-3.91523
JU1652	-0.0103292	2.1312
JU1793	-0.0727581	0.274393
JU1896	-0.0316351	-1.14361
JU2001	-0.0185278	0.427744
JU2007	-0.0572279	-0.696572
JU2017	-0.0810881	-2.23187
JU2106	-0.115824	-1.47495
JU2234	0.00752488	-1.0305
JU2316	-0.0152994	0.679877
JU2464	-0.0683345	-1.61174
JU2519	0.0606977	4.62084
JU2526	0.102001	6.25755
JU2576	-0.0160616	0.115232
JU258	-0.150557	-3.59366
JU2592	-0.113296	-3.97403
JU2593	-0.0369412	0.332641
JU2619	-0.0625432	-0.301217
JU2811	-0.115591	-2.64776
JU2829	-0.0539823	-0.388233
JU2838	0.0261099	2.34243
JU2841	0.0017672	0.51253
JU2878	0.0176626	3.82667
JU2879	-0.00745388	-1.17025
JU3137	-0.138942	-3.12298
JU561	-0.00888	1.97728
JU774	-0.00618677	-1.94946
JU775	0.00335483	1.19866
JU782	-0.0468532	1.24749
KR314	-0.0658848	-0.115547
LKC34	-0.0525902	-0.300338
MY10	-0.0966282	-2.54511
MY16	-0.0920112	-4.13476
MY18	-0.143713	-4.63255
MY2147	-0.18377	-5.1548
MY23	-0.0317404	-0.576799
MY2453	-0.0768739	-2.11847
MY2741	-0.0941992	-0.472084
N2	0.00207669	1.43453
NIC195	-0.0414694	1.4887
NIC199	-0.00993842	1.5632
NIC251	0.00480774	0.267446
NIC252	0.0816743	4.81637
NIC256	-0.0698605	0.969948
NIC258	0.0670649	4.09238
NIC261	0.0398432	5.55374
NIC262	0.046491	5.16491
NIC265	0.0297359	3.99534
NIC266	-0.0496294	1.19204
NIC268	-0.00732948	-0.379338
NIC271	-0.0299852	-0.344031
NIC3	-0.0664076	-2.27156
NIC501	-0.0868777	-1.03744
NIC523	0.0589724	1.01358
NIC526	-0.181314	-6.003
NIC527	-0.129641	-2.78824
NIC528	0.022799	1.00568
PB306	-0.0668337	-2.36983
PS2025	0.00783874	1.71158
QG2075	0.0109334	-3.81289
QG556	-0.106268	-2.13296
QW947	-0.0707224	0.70915
QX1211	0.0150645	0.967091
QX1212	-0.022529	0.727978
QX1791	-0.0675881	-0.726787
QX1792	-0.0678962	-0.258411
QX1793	-0.0921616	-4.69315
QX1794	-0.0741465	-2.32739
WN2001	-0.0707802	-2.48297
XZ1513	-0.0835299	-2.46369
XZ1514	-0.11523	-3.57638
XZ1515	-0.00846445	1.23615
XZ1516	-0.0378897	0.571691

## Sheet: MIPgen_output
mip_name	strain	mip_sequence	X.mip_key	logistic_score	chr	ext_probe_start	ext_probe_stop	ext_probe_copy	ext_probe_sequence	lig_probe_start	lig_probe_stop	lig_probe_copy	lig_probe_sequence	mip_scan_start_position	mip_scan_stop_position	scan_target_sequence	feature_start_position	feature_stop_position	probe_strand	failure_flags	min_read_length
CB4854_I:1341686:T->C,A_0099	CB4854	GCTCCGCGGGGCTAATTTTNNNNNNNNNNCTTCAGCTTCCCGATATCCGACGGTAGTGTGCCGGGTTCGATGGTGATTGC	I:1341616-1341715/21,19/+	0.989879	I	1341616	1341636	1	GCCGGGTTCGATGGTGATTGC	1341697	1341715	1	GCTCCGCGGGGCTAATTTT	1341637	1341696	CTGGAAGATATCGATTTTTACGTGAAAATTCGGAAAAATTGAGGTTTTCTGGATTTTCCA	1341681	1341691	+	0	30
CB4854_II:14776068:G->A_1044	CB4854	CCAAAAAAGGCCAAACAAAGGNNNNNNNNNNCTTCAGCTTCCCGATATCCGACGGTAGTGTAAAAGGCCAGAAACCCATT	II:14776000-14776099/19,21/+	0.988124	II	14776000	14776018	1	AAAAGGCCAGAAACCCATT	14776079	14776099	1	CCAAAAAAGGCCAAACAAAGG	14776019	14776078	TTAAAAAAATGCAAAAGAGGCAAAAAAGGCCAAACACAGGTTTTAAAAGGCAAAAAAACT	14776063	14776073	+	0	32
CB4854_IV:13844144:T->C_1393	CB4854	GGGGGGGGGGAGTTTGAGGGTNNNNNNNNNNCTTCAGCTTCCCGATATCCGACGGTAGTGTGAGATTGGGAGTTGGGGTT	IV:13844076-13844175/19,21/+	0.990034	IV	13844076	13844094	1	GAGATTGGGAGTTGGGGTT	13844155	13844175	1	GGGGGGGGGGAGTTTGAGGGT	13844095	13844154	TGACGATAACTGTGCCCGTCCTTGCGGACGGGCTTCTTTTATACTCCTGTCCCAGGGGGG	13844139	13844149	+	0	32
CB4854_X:15144403:A->T_1770	CB4854	CCAGCTGGCGTTAATAATTATTCGNNNNNNNNNNCTTCAGCTTCCCGATATCCGACGGTAGTGTAGGTGGTCACCATGGT	X:15144338-15144437/16,24/+	0.988127	X	15144338	15144353	1	AGGTGGTCACCATGGT	15144414	15144437	1	CCAGCTGGCGTTAATAATTATTCG	15144354	15144413	CACCTAAATAGGCAGAAAAATAAAAAATATATAAATGGAGAAAATGTGAAGGTGTCATGC	15144398	15144408	+	0	35
CB4856_I:9767293:G->A_2812	CB4856	TCACGGGGGCTAGCGCAATCNNNNNNNNNNCTTCAGCTTCCCGATATCCGACGGTAGTGTGACATCAGATGGGAATTGGC	I:9767224-9767323/20,20/+	0.997633	I	9767224	9767243	1	GACATCAGATGGGAATTGGC	9767304	9767323	1	TCACGGGGGCTAGCGCAATC	9767244	9767303	GTTTAAAAATTTGGAAAAATAAAAAAACATTGATATATTACAATAAATAGGAACGAGGCA	9767288	9767298	+	0	31
CB4856_III:1209062:A->G_9612	CB4856	ATTTCCGAACCGCGACGCGNNNNNNNNNNCTTCAGCTTCCCGATATCCGACGGTAGTGTGACGCGACTGCTACGCACCTA	III:1208992-1209091/21,19/+	0.996702	III	1208992	1209012	1	GACGCGACTGCTACGCACCTA	1209073	1209091	1	ATTTCCGAACCGCGACGCG	1209013	1209072	AAATTCAGGAAAATTCAAATTTTCCCAAAAACTATCGATTTTTAAACGAAAAAAAGGCAA	1209057	1209067	+	0	30
CB4856_IV:1607284:A->C_12264	CB4856	GACGGCTGGAAGAGGTGGAGNNNNNNNNNNCTTCAGCTTCCCGATATCCGACGGTAGTGTAAAACGGAAGAAGGAGCAGG	IV:1607215-1607314/20,20/+	0.999014	IV	1607215	1607234	1	AAAACGGAAGAAGGAGCAGG	1607295	1607314	1	GACGGCTGGAAGAGGTGGAG	1607235	1607294	AAAAGCGAGAAATTGAGAATAAAATCAAAGAAGCGAGAAAGAAACGAGAACAGGAAGCCC	1607279	1607289	+	0	31
CB4856_X:13967551:G->A_23167	CB4856	TGAGACGACTCACCTCCGGNNNNNNNNNNCTTCAGCTTCCCGATATCCGACGGTAGTGTCGGGCGCTGGCCATCGTATTG	X:13967481-13967580/21,19/+	0.996176	X	13967481	13967501	1	CGGGCGCTGGCCATCGTATTG	13967562	13967580	1	TGAGACGACTCACCTCCGG	13967502	13967561	AGAAATATTGTCGCTCTAAATAAATTGAAACTTTTAAAAACCTATTTTCGAATTAAAATT	13967546	13967556	+	0	30
CX11254_II:12788569:T->A_0182	CX11254	AATTCAGACGGAGCACTTATTGCTNNNNNNNNNNCTTCAGCTTCCCGATATCCGACGGTAGTGTAGGAGACAACAAAAGG	II:12788504-12788603/16,24/+	0.980927	II	12788504	12788519	1	AGGAGACAACAAAAGG	12788580	12788603	1	AATTCAGACGGAGCACTTATTGCT	12788520	12788579	GAAAAATTGCGGGTTAAAAATGGCCGGGAAAACCAAAAAAAAACATTTTTTAAAAAAATA	12788564	12788574	+	0	35
CX11254_III:10578934:G->A_0248	CX11254	GGAAACATGCCGCCACCCATCGGNNNNNNNNNNCTTCAGCTTCCCGATATCCGACGGTAGTGTTGTACCATATCTTACGC	III:10578871-10578970/17,23/+	0.980669	III	10578871	10578887	1	TGTACCATATCTTACGC	10578948	10578970	1	GGAAACATGCCGCCACCCATCGG	10578888	10578947	GATAACTCTATAAAAGTTTTAACAAAAACTCAATAAGCCTTGATGGGCGGACTCGAACAA	10578929	10578939	+	0	37
CX11254_V:13687742:A->C_0333	CX11254	AGATGGATGGAATGGAGCCGNNNNNNNNNNCTTCAGCTTCCCGATATCCGACGGTAGTGTTAAATTGATGAGCTATTGGA	V:13687673-13687772/20,20/+	0.982232	V	13687673	13687692	1	TAAATTGATGAGCTATTGGA	13687753	13687772	1	AGATGGATGGAATGGAGCCG	13687693	13687752	CAGAAGAGAGAATGAAGAAGAAGGAGAACAAATTGAAAAATCTGGAAAAAAAAGAGAATG	13687737	13687747	+	0	31
CX11254_V:238621:A->G_0301	CX11254	GTCTGACAGAAAGTTGTAAACGTCNNNNNNNNNNCTTCAGCTTCCCGATATCCGACGGTAGTGTCGAAAAGCCGCAGAAG	V:238559-238658/16,24/+	0.981278	V	238559	238574	1	CGAAAAGCCGCAGAAG	238635	238658	1	GTCTGACAGAAAGTTGTAAACGTC	238575	238634	ATCGCCAAGGGGTTACAAAAGTTCAACGCCTGCGAAAAATGCGACTAAAAAGTTACAAAA	238616	238626	+	0	38
CX11262_I:12073209:C->A_0057	CX11262	TATGCCATTCGATAGTGCATGTCTNNNNNNNNNNCTTCAGCTTCCCGATATCCGACGGTAGTGTCCCAATCAACAACGAC	I:12073144-12073243/16,24/+	0.980017	I	12073144	12073159	1	CCCAATCAACAACGAC	12073220	12073243	14	TATGCCATTCGATAGTGCATGTCT	12073160	12073219	GAAATAGTCTCCTTACTAGGGAACCGTCAGAAGGTGCCCATCGGACTTGCATATAAGACC	12073182	12073214	+	0	35
CX11262_III:12331372:T->A_0209	CX11262	GCCGATTTGCCGATTTGTCANNNNNNNNNNCTTCAGCTTCCCGATATCCGACGGTAGTGTTTGCCGGTTTGCCGGAATTT	III:12331303-12331402/20,20/+	0.987122	III	12331303	12331322	34	TTGCCGGTTTGCCGGAATTT	12331383	12331402	2	GCCGATTTGCCGATTTGTCA	12331323	12331382	TTCAATTTGCCGTTTTGCCGAAAATTTTCAATTTGCCGATTTGCCGGAATTTTTCAATTT	12331367	12331377	+	0	31
CX11262_V:19829399:C->T_0424	CX11262	GCTTAGGCATAGGCCCAGGCTNNNNNNNNNNCTTCAGCTTCCCGATATCCGACGGTAGTGTTGGGCTTAGGCTTGGGATT	V:19829331-19829430/19,21/+	0.98542	V	19829331	19829349	2	TGGGCTTAGGCTTGGGATT	19829410	19829430	1	GCTTAGGCATAGGCCCAGGCT	19829350	19829409	AAGTTTTGGCTTAGGCTTAGCTCTAGGCCTACATAGGCATAAGCCTAGGCTTTGGCTTAG	19829394	19829404	+	0	32
CX11264_IV:11244600:G->A_0125	CX11264	GAAAAAGCTGTTAGTCGCCAGGNNNNNNNNNNCTTCAGCTTCCCGATATCCGACGGTAGTGTGGCAACACGTGTGTAACA	IV:11244533-11244632/18,22/+	0.984871	IV	11244533	11244550	1	GGCAACACGTGTGTAACA	11244611	11244632	1	GAAAAAGCTGTTAGTCGCCAGG	11244551	11244610	AACAAAACACAAAACCTTAACCGGTCAAAACATATTGAAGGAAATGTGAGGAATTTCGTA	11244595	11244605	+	0	33
CX11264_V:17198338:C->G_0165	CX11264	GCCGAATCCACGGGCTGTANNNNNNNNNNCTTCAGCTTCCCGATATCCGACGGTAGTGTGTGATGTTTTTGTTTCGCTGC	V:17198268-17198367/21,19/+	0.984769	V	17198268	17198288	1	GTGATGTTTTTGTTTCGCTGC	17198349	17198367	1	GCCGAATCCACGGGCTGTA	17198289	17198348	ACGTAGTACATTGCCTAAAACATTTCCTAATTAATTGTAAATGTAATATCTCAAGAGGGT	17198333	17198343	+	0	30
CX11264_X:2275255:G->C_0412	CX11264	TAATCGGCAGCTTTGAGAAGTCNNNNNNNNNNCTTCAGCTTCCCGATATCCGACGGTAGTGTACTCAAGTGTTTTTAGTG	X:2275188-2275287/18,22/+	0.98406	X	2275188	2275205	1	ACTCAAGTGTTTTTAGTG	2275266	2275287	1	TAATCGGCAGCTTTGAGAAGTC	2275206	2275265	ACGACAAATCAAAAGCAAGCTACTAAAAATACAAGGAAATTCAGAGAAAGCAGAAACGAA	2275250	2275260	+	0	33
CX11264_X:6426986:A->C_0583	CX11264	GTAACCCGAGTATTGCTTGAAGNNNNNNNNNNCTTCAGCTTCCCGATATCCGACGGTAGTGTGACGAGTGGGTCGGTGGT	X:6426919-6427018/18,22/+	0.986315	X	6426919	6426936	1	GACGAGTGGGTCGGTGGT	6426997	6427018	1	GTAACCCGAGTATTGCTTGAAG	6426937	6426996	TGGGTTTCCTTGAGACTCGACAAACCAATAATGAAGATAGTTTCCGGTAACACCATTCAA	6426981	6426991	+	0	33
CX11271_I:10356319:G->A_0062	CX11271	GGAACACGTTGTGGCTTCTGNNNNNNNNNNCTTCAGCTTCCCGATATCCGACGGTAGTGTCAGTGAAAAAACGGGCAAGA	I:10356250-10356349/20,20/+	0.982012	I	10356250	10356269	1	CAGTGAAAAAACGGGCAAGA	10356330	10356349	1	GGAACACGTTGTGGCTTCTG	10356270	10356329	AACGAGAATAGGGGACAGGAACAGGTGGTAACAACCTGACGATGACGACGAAACGGACAC	10356314	10356324	+	0	31
CX11271_II:12842575:T->A_0147	CX11271	AAATTTCAGAGACCCCCTCNNNNNNNNNNCTTCAGCTTCCCGATATCCGACGGTAGTGTAAAGGGGGTTTGGCCATGCTC	II:12842505-12842604/21,19/+	0.984576	II	12842505	12842525	1	AAAGGGGGTTTGGCCATGCTC	12842586	12842604	1	AAATTTCAGAGACCCCCTC	12842526	12842585	ACTCAATCAAAAGAGCTCGAAAAACAGCTCAAAGCGAATAAAGTTCTTCTAAAAATCATC	12842570	12842580	+	0	30
CX11271_III:2697403:C->G_0218	CX11271	TAAAATCGAATCGCAAGCCNNNNNNNNNNCTTCAGCTTCCCGATATCCGACGGTAGTGTGTTTTTGGGGATTTCTGTGTC	III:2697333-2697432/21,19/+	0.991099	III	2697333	2697353	1	GTTTTTGGGGATTTCTGTGTC	2697414	2697432	1	TAAAATCGAATCGCAAGCC	2697354	2697413	CGGAGACGGAAATTCAGAAGAAAAAAAAACGAATTCAGTGCTCAAATGACAAAGAATCAG	2697398	2697408	+	0	30
CX11271_IV:1231923:C->T_0690	CX11271	GCCTGGCACTTGTTGAAGAGNNNNNNNNNNCTTCAGCTTCCCGATATCCGACGGTAGTGTGAGGGCTCAGTGGAGCAGGA	IV:1231854-1231953/20,20/+	0.987207	IV	1231854	1231873	1	GAGGGCTCAGTGGAGCAGGA	1231934	1231953	1	GCCTGGCACTTGTTGAAGAG	1231874	1231933	AAAGTATCAATTGACTTCTAACCATGAAGCTTTTCCAAGTTCTTATCATCTCCATGATTT	1231918	1231928	+	0	31
CX11276_I:11281245:C->T_0361	CX11276	TAATTTTTGTCACTGGAAACACCCNNNNNNNNNNCTTCAGCTTCCCGATATCCGACGGTAGTGTGGTAGGCTAGGGTTAC	I:11281180-11281279/16,24/+	0.988197	I	11281180	11281195	1	GGTAGGCTAGGGTTAC	11281256	11281279	1	TAATTTTTGTCACTGGAAACACCC	11281196	11281255	TATACAAGAAACCTACGATTACAGAAAAAAGTAAAATTCACAAAAAAAACCTATAATTAT	11281240	11281250	+	0	35
CX11276_III:359396:G->A_1022	CX11276	TCCTTGATATTCGGTGAGCGGNNNNNNNNNNCTTCAGCTTCCCGATATCCGACGGTAGTGTTGTGAAGACGGCTGGGAAG	III:359328-359427/19,21/+	0.987073	III	359328	359346	1	TGTGAAGACGGCTGGGAAG	359407	359427	1	TCCTTGATATTCGGTGAGCGG	359347	359406	AGCAAATTTTATTACTAGCAAATTTTTCAATTGTGCAGGCAGAAATCGTGAAATCACATC	359391	359401	+	0	32
CX11276_V:20320751:A->G_1810	CX11276	AAACCTGGACTCGAGTTTATGNNNNNNNNNNCTTCAGCTTCCCGATATCCGACGGTAGTGTCGCTGCTTCTGCTGTTGGA	V:20320683-20320782/19,21/+	0.987718	V	20320683	20320701	1	CGCTGCTTCTGCTGTTGGA	20320762	20320782	1	AAACCTGGACTCGAGTTTATG	20320702	20320761	GTTTTGGAAAAATATAAAAAATGCCAAAATGACGGCGGACAACAAACAGACGACGAACGT	20320746	20320756	+	0	32
CX11276_X:15381676:C->T_2053	CX11276	CTGGTTTGGGGGGGGGGGGNNNNNNNNNNCTTCAGCTTCCCGATATCCGACGGTAGTGTGTAAGACGAAGAAAAGGGACC	X:15381606-15381705/21,19/+	0.993589	X	15381606	15381626	1	GTAAGACGAAGAAAAGGGACC	15381687	15381705	1	CTGGTTTGGGGGGGGGGGG	15381627	15381686	CACAAAAGCTTCAAAGGTTATTCAGAGAACAGAAACGACAAGTTTCGGCCAAGTGGTTTC	15381671	15381681	+	0	30
CX11285_II:9262194:G->A_0142	CX11285	GAGGGCTGTTGTTGTTGGTGNNNNNNNNNNCTTCAGCTTCCCGATATCCGACGGTAGTGTCTAGGCTCCCGGACGACAAC	II:9262125-9262224/20,20/+	0.988835	II	9262125	9262144	1	CTAGGCTCCCGGACGACAAC	9262205	9262224	1	GAGGGCTGTTGTTGTTGGTG	9262145	9262204	ACTGGCAGAGTCACAAACATAAAATATGGGCGGAGAAGAGGAAGAAGAAGAAGAAGAAGA	9262189	9262199	+	0	31
CX11285_III:12362318:G->C_0276	CX11285	ACTTTTCCGGCAAATCGGCAAGCCNNNNNNNNNNCTTCAGCTTCCCGATATCCGACGGTAGTGTAAGCGGACGTTCTTTG	III:12362253-12362352/16,24/+	0.987875	III	12362253	12362268	1	AAGCGGACGTTCTTTG	12362329	12362352	1	ACTTTTCCGGCAAATCGGCAAGCC	12362269	12362328	GTTTTTTTTGTTTCTAAAAATAAAAAAATTTCCGGCAAATCGAAAAATTGCCGGAATCGA	12362310	12362323	+	0	35
CX11285_IV:4747802:C->A_0343	CX11285	CTTGGTGCATTGGTGCCCATTTTGNNNNNNNNNNCTTCAGCTTCCCGATATCCGACGGTAGTGTTGGAGTATCAGCCGAA	IV:4747737-4747836/16,24/+	0.993053	IV	4747737	4747752	1	TGGAGTATCAGCCGAA	4747813	4747836	1	CTTGGTGCATTGGTGCCCATTTTG	4747753	4747812	CAATAAGTTAAAAGAAAAATAAATCCAAGAAGATGCATGACAAAAAGCTCGTTCCGATTT	4747797	4747807	+	0	35
CX11285_X:7864359:A->C_0624	CX11285	AAGGATCGCGTCCACGAGTGNNNNNNNNNNCTTCAGCTTCCCGATATCCGACGGTAGTGTAAAAAGTAGAGCAGCACAGG	X:7864290-7864389/20,20/+	0.99562	X	7864290	7864309	1	AAAAAGTAGAGCAGCACAGG	7864370	7864389	1	AAGGATCGCGTCCACGAGTG	7864310	7864369	GATACGGGAAGCAAAAATGCAGAAGATGAGAGCCGGAGCAAAAAGACGAAGAAGAAGAAG	7864354	7864364	+	0	31
CX11307_I:11966814:T->G_0086	CX11307	AGCTCCACACGCAGAAGATTCNNNNNNNNNNCTTCAGCTTCCCGATATCCGACGGTAGTGTGAAAAGAAGGCGTGACGGA	I:11966746-11966845/19,21/+	0.989019	I	11966746	11966764	1	GAAAAGAAGGCGTGACGGA	11966825	11966845	1	AGCTCCACACGCAGAAGATTC	11966765	11966824	GAAGGGTAAATTTATAGTCTAGTGAATTCTAACTAAAAAAATTAAATATTACAGAACATC	11966809	11966819	+	0	32
CX11307_II:11271250:G->A_0349	CX11307	TCTGCTCCAGAAGCCGCCGNNNNNNNNNNCTTCAGCTTCCCGATATCCGACGGTAGTGTCACTTTGGATATCATGGAGGT	II:11271180-11271279/21,19/+	0.988236	II	11271180	11271200	1	CACTTTGGATATCATGGAGGT	11271261	11271279	1	TCTGCTCCAGAAGCCGCCG	11271201	11271260	AATAAATTTCAAGTTTTAAAAAAGTTTTTAATTTTTAAAATATTCCAGGGAGCCTCCCCA	11271245	11271255	+	0	30
CX11307_IV:16321575:C->T_0502	CX11307	ACGAAGTGTCGTTGTGGAGATCAGNNNNNNNNNNCTTCAGCTTCCCGATATCCGACGGTAGTGTGCAAATGGAAGAGATG	IV:16321510-16321609/16,24/+	0.983645	IV	16321510	16321525	1	GCAAATGGAAGAGATG	16321586	16321609	1	ACGAAGTGTCGTTGTGGAGATCAG	16321526	16321585	GCCGTGAATTGTGGAAACCTCGTCCCCCGGGAAATTATAAACTACAAGACGTGTATAAAA	16321570	16321580	+	0	35
CX11307_V:16498729:A->T_0707	CX11307	AATGTGTTTCGCGTGGCGAACCNNNNNNNNNNCTTCAGCTTCCCGATATCCGACGGTAGTGTACACAGTTACCAAAGTTG	V:16498664-16498763/18,22/+	0.986074	V	16498664	16498681	1	ACACAGTTACCAAAGTTG	16498742	16498763	1	AATGTGTTTCGCGTGGCGAACC	16498682	16498741	CATCTGCAAAAAATCTACAGTAATCTTAAAGGCGCATCCTGAAAAAAAGGAATTAAAAAA	16498724	16498734	+	0	35
DL200_I:14791278:G->A_0113	DL200	TGTGGACTCTTTCCGTACACCTGCNNNNNNNNNNCTTCAGCTTCCCGATATCCGACGGTAGTGTATCACCACCATCAGCAC	I:14791212-14791311/17,24/+	0.981903	I	14791212	14791228	1	ATCACCACCATCAGCAC	14791288	14791311	1	TGTGGACTCTTTCCGTACACCTGC	14791229	14791287	CAGCCACAACAACATTTACATTATATGATTGATAGTCAAGACTCAGATAGTCAGGATTC	14791273	14791283	+	0	34
DL200_II:10684581:C->T_0188	DL200	TAACAGTAGTTTCATCCGCTTTCCNNNNNNNNNNCTTCAGCTTCCCGATATCCGACGGTAGTGTGTGTCCGTTTCGCGGG	II:10684516-10684615/16,24/+	0.981838	II	10684516	10684531	1	GTGTCCGTTTCGCGGG	10684592	10684615	1	TAACAGTAGTTTCATCCGCTTTCC	10684532	10684591	GCTATGAGATTAACGGTTTGCAATGGACGAGAATAATATAATAATCGACCGCCGACCCAG	10684576	10684586	+	0	35
DL200_V:17954136:A->G_0656	DL200	ATCCGGTCAATGTCCGCTCNNNNNNNNNNCTTCAGCTTCCCGATATCCGACGGTAGTGTGGGGGGGGGGGGGGAGCTCGG	V:17954066-17954165/21,19/+	0.999562	V	17954066	17954086	1	GGGGGGGGGGGGGGAGCTCGG	17954147	17954165	1	ATCCGGTCAATGTCCGCTC	17954087	17954146	CGGAAAATTCAAAAAAAGAAAAGAAAAAAATCGTTTAGTCGAGCAGCGAAATTTGGGCGA	17954131	17954141	+	0	30
DL200_X:16129009:C->T_0867	DL200	AGCTGTGTTGGGTGGCAGGNNNNNNNNNNCTTCAGCTTCCCGATATCCGACGGTAGTGTAATTTCATAGACAGAGAGCGG	X:16128939-16129038/21,19/+	0.993879	X	16128939	16128959	1	AATTTCATAGACAGAGAGCGG	16129020	16129038	1	AGCTGTGTTGGGTGGCAGG	16128960	16129019	GCACAAGAAGAGAGAGACAAACGCACAAAAAAGAGGGGAGAAGATGAAGCAAGAGCGGAG	16129004	16129014	+	0	30
DL226_I:15015474:A->T_0374	DL226	GGTTAAGCACCGCCCGCCCNNNNNNNNNNCTTCAGCTTCCCGATATCCGACGGTAGTGTGGAAAAGTGCCAGACTCCTGA	I:15015404-15015503/21,19/+	0.991863	I	15015404	15015424	1	GGAAAAGTGCCAGACTCCTGA	15015485	15015503	1	GGTTAAGCACCGCCCGCCC	15015425	15015484	AATTTGAGGTTTTCTTTTTAATTCTCGAAGCGAAATGCAGAAATATCTAAAAAAAATAAT	15015469	15015479	+	0	30
DL226_II:9596545:G->T_0445	DL226	CGGGTCTCTGTAGCACGCTGNNNNNNNNNNCTTCAGCTTCCCGATATCCGACGGTAGTGTGATGGACATGTCAAAGCGAG	II:9596476-9596575/20,20/+	0.983305	II	9596476	9596495	1	GATGGACATGTCAAAGCGAG	9596556	9596575	1	CGGGTCTCTGTAGCACGCTG	9596496	9596555	CTGACTTGAAGCAGGTTCAATACGGAAGATAAATAAAATCTTTAATTTTGTTTTTTTTTT	9596540	9596550	+	0	31
DL226_IV:13272736:G->A_0890	DL226	GCAGAAGGGGAAAAGCCCTGNNNNNNNNNNCTTCAGCTTCCCGATATCCGACGGTAGTGTGAATAGAAGAGACGCAGAAA	IV:13272667-13272766/20,20/+	0.984973	IV	13272667	13272686	1	GAATAGAAGAGACGCAGAAA	13272747	13272766	1	GCAGAAGGGGAAAAGCCCTG	13272687	13272746	AATGCATTGGGAGAGACGCAGAGATGTGAATATATTGACGAAGAAAAAAGGAAGACGATG	13272730	13272741	+	0	31
DL226_V:16590610:A->T_1043	DL226	TTGATGTACTCGCGGAGCTCNNNNNNNNNNCTTCAGCTTCCCGATATCCGACGGTAGTGTCAGTGACCAGGGTAATCAAA	V:16590541-16590640/20,20/+	0.990778	V	16590541	16590560	1	CAGTGACCAGGGTAATCAAA	16590621	16590640	1	TTGATGTACTCGCGGAGCTC	16590561	16590620	ATGATAAGAGTGAGAAAAAACCCATAAGAATCTGAGGAGAGAACTAGAAAGTCGAAATCT	16590605	16590615	+	0	31
DL238_I:12524422:A->T_2849	DL238	GACAGAGAGACGGAGAGAANNNNNNNNNNCTTCAGCTTCCCGATATCCGACGGTAGTGTAAATGGAGAAAGAGAAGGAGA	I:12524352-12524451/21,19/+	0.992524	I	12524352	12524372	1	AAATGGAGAAAGAGAAGGAGA	12524433	12524451	1	GACAGAGAGACGGAGAGAA	12524373	12524432	GGAAGACGGGGCAAAAAATGCGAAAACGATGGAGAAAATCGAGTAAGAGAGACACAGAAA	12524417	12524427	+	0	30
DL238_II:12072245:G->T_7537	DL238	AAAAAATTATGGCGGGGGGNNNNNNNNNNCTTCAGCTTCCCGATATCCGACGGTAGTGTGGGGGGGGGGGGGCGTATTTA	II:12072175-12072274/21,19/+	0.996461	II	12072175	12072195	1	GGGGGGGGGGGGGCGTATTTA	12072256	12072274	1	AAAAAATTATGGCGGGGGG	12072196	12072255	CAAACAAAGATTTATGAAGAGAAGCGATAGAAATTTGGCTGGAAATGTTGAAAAACAGGA	12072240	12072250	+	0	30
DL238_III:12556120:G->T_11662	DL238	GGGAGCCTGATCGAGTTAAGNNNNNNNNNNCTTCAGCTTCCCGATATCCGACGGTAGTGTTGGGCGCTGTTGTTGATAGG	III:12556051-12556150/20,20/+	0.997737	III	12556051	12556070	1	TGGGCGCTGTTGTTGATAGG	12556131	12556150	1	GGGAGCCTGATCGAGTTAAG	12556071	12556130	GTCGTTTGTGGGGAAAAAAGCAAAAAAAAAAAGAATAAAAAGGGAAAAAGTTGTCCCAAG	12556115	12556125	+	0	31
DL238_IV:807883:A->T_12381	DL238	AAGATTTTGAGGAGGCGGGNNNNNNNNNNCTTCAGCTTCCCGATATCCGACGGTAGTGTGTGGAGCGCAGCAGTACATAC	IV:807813-807912/21,19/+	0.990927	IV	807813	807833	1	GTGGAGCGCAGCAGTACATAC	807894	807912	1	AAGATTTTGAGGAGGCGGG	807834	807893	TCAAAAAAACACAAAAAAAAACAGGGGTAAATATTATGGTCACGGGAAAACAGATCGATA	807878	807888	+	0	30
ECA189_I:11586767:T->A_0519	ECA189	TACGGACCGCCCTACACCGNNNNNNNNNNCTTCAGCTTCCCGATATCCGACGGTAGTGTCGAAAACTTGCTTTGACGTGA	I:11586697-11586796/21,19/+	0.992782	I	11586697	11586717	1	CGAAAACTTGCTTTGACGTGA	11586778	11586796	1	TACGGACCGCCCTACACCG	11586718	11586777	CTCTAAAGACGGTGAGAGCGGCGGCGCCACGCAAAAAAAAAATCAATAATCAAATTTCAG	11586762	11586772	+	0	30
ECA189_III:3209354:T->C_3149	ECA189	CGCCTATCTGTCTGGGCTTGCCGNNNNNNNNNNCTTCAGCTTCCCGATATCCGACGGTAGTGTAATTGCATTTCACACTA	III:3209288-3209387/17,23/+	0.991494	III	3209288	3209304	1	AATTGCATTTCACACTA	3209365	3209387	1	CGCCTATCTGTCTGGGCTTGCCG	3209305	3209364	GTAAAACTTGAGAAAACTACGGCGGAAAAGTGAGAAAAAACACAAAAAATTGAAGAAATT	3209349	3209359	+	0	34
ECA189_IV:16342115:G->A_5404	ECA189	AACGATGCGAGCGCGCTCCNNNNNNNNNNCTTCAGCTTCCCGATATCCGACGGTAGTGTGTGAAAAACCGACACGAATGA	IV:16342045-16342144/21,19/+	0.99704	IV	16342045	16342065	1	GTGAAAAACCGACACGAATGA	16342126	16342144	1	AACGATGCGAGCGCGCTCC	16342066	16342125	GCGAAACTGGTTGAAAAAGCTGAAATGGGAGCAGAAAACAAAAATAAATGAAGAAAATGA	16342110	16342120	+	0	30
ECA189_V:18750651:G->A_7860	ECA189	CCACAATGTTCTGGACATCNNNNNNNNNNCTTCAGCTTCCCGATATCCGACGGTAGTGTGTGAGTAAGTAGTGATGAGGG	V:18750581-18750680/21,19/+	0.997049	V	18750581	18750601	1	GTGAGTAAGTAGTGATGAGGG	18750662	18750680	1	CCACAATGTTCTGGACATC	18750602	18750661	AAGAAATATCTATAAAGCCAAAAAAAATGAACAGCAAAATCTGATGAGAGAAAAAAAAGA	18750646	18750656	+	0	30
ECA191_I:14707170:A->G_5392	ECA191	CGAATTGCGGTGAGCCGTGNNNNNNNNNNCTTCAGCTTCCCGATATCCGACGGTAGTGTCAGGGTGGAAAACGAGAAAAC	I:14707100-14707199/21,19/+	0.998571	I	14707100	14707120	1	CAGGGTGGAAAACGAGAAAAC	14707181	14707199	1	CGAATTGCGGTGAGCCGTG	14707121	14707180	GGGGAAAAATCAACAAAAATTCAAAAAAAAAAACGAGAGAAATTATTACAAGGAGGCGAG	14707165	14707175	+	0	30
ECA191_II:11937699:A->G_9779	ECA191	AAATGCTCGAAGAACGGCACNNNNNNNNNNCTTCAGCTTCCCGATATCCGACGGTAGTGTGTGGCGCATCAGGATCAAAG	II:11937630-11937729/20,20/+	0.990778	II	11937630	11937649	1	GTGGCGCATCAGGATCAAAG	11937710	11937729	1	AAATGCTCGAAGAACGGCAC	11937650	11937709	GGAAAAAAACGCGGGGATTAGAGACGAGAAAAAATCAGAGAAGGAGAGAAAAAAGCGGGG	11937694	11937704	+	0	31
ECA191_III:13349506:G->C_16643	ECA191	GACGACGACGAGATGACGGNNNNNNNNNNCTTCAGCTTCCCGATATCCGACGGTAGTGTCACACACACAATCTTTTCGGC	III:13349436-13349535/21,19/+	0.996345	III	13349436	13349456	1	CACACACACAATCTTTTCGGC	13349517	13349535	1	GACGACGACGAGATGACGG	13349457	13349516	GAAAAAAAAAATGAGCAAGAAACACGGAGAAGGAAGAGCTGATTAAACCGAAAAAAAAAC	13349501	13349511	+	0	30
ECA191_IV:1126414:G->A_17243	ECA191	GTGTTGCAACATGTGTCTGNNNNNNNNNNCTTCAGCTTCCCGATATCCGACGGTAGTGTGTGATGGATTGAGCAGCGAAG	IV:1126344-1126443/21,19/+	0.995051	IV	1126344	1126364	1	GTGATGGATTGAGCAGCGAAG	1126425	1126443	1	GTGTTGCAACATGTGTCTG	1126365	1126424	AAAAAAGAAAATGGAAAAGCTGAAAAAAATAGTCGGTCGAAAAAAAAGTGACCTAAGGAT	1126409	1126419	+	0	30
ECA348_II:1153436:G->A_0106	ECA348	GGCCTAGAATGAGCGCTCTCNNNNNNNNNNCTTCAGCTTCCCGATATCCGACGGTAGTGTGGAAAACAGGTACAGCAACC	II:1153367-1153466/20,20/+	0.991282	II	1153367	1153386	2	GGAAAACAGGTACAGCAACC	1153447	1153466	1	GGCCTAGAATGAGCGCTCTC	1153387	1153446	TAACACAGGAATGGGAAGGAAAAAGGGGAGAAGGGAACGAAAAACGAGTGAATGGGAAAA	1153351	1153441	+	0	31
ECA348_III:1413663:G->T_0380	ECA348	GTTGGCATTGGAGCGCACTNNNNNNNNNNCTTCAGCTTCCCGATATCCGACGGTAGTGTGTTTTTTTGCGGTTTTCCGGC	III:1413630-1413729/21,19/-	0.982981	III	1413709	1413729	1	GTTTTTTTGCGGTTTTCCGGC	1413630	1413648	1	GTTGGCATTGGAGCGCACT	1413649	1413708	ATAAAACTACTGAAATTGATTTTAAAAATTAGGGTGCGGAGCGGTCGCGTCGCGGCTTCA	1413658	1413668	-	0	34
ECA348_IV:1833820:C->T_0459	ECA348	GGGAGTCCCAGTGTTGCCANNNNNNNNNNCTTCAGCTTCCCGATATCCGACGGTAGTGTTGGGGTGAGTTGCGAACGAAA	IV:1833795-1833894/21,19/-	0.981739	IV	1833874	1833894	1	TGGGGTGAGTTGCGAACGAAA	1833795	1833813	1	GGGAGTCCCAGTGTTGCCA	1833814	1833873	AAAACAATTTCAAAAAAAAATCACAGTGGAGCATGTTTGCGCGGCGCGGGTGTGTGGACG	1833815	1833825	-	0	26
ECA348_V:19083280:A->G,C_0727	ECA348	GACCGGGGTTCGAGCCCCCACTNNNNNNNNNNCTTCAGCTTCCCGATATCCGACGGTAGTGTACGGAAACCTCCAAAAAA	V:19083213-19083312/18,22/+	0.982163	V	19083213	19083230	1	ACGGAAACCTCCAAAAAA	19083291	19083312	5	GACCGGGGTTCGAGCCCCCACT	19083231	19083290	AAATTCCAAAAAAGTTGACTTTTTAACACAACTGGTTAGAGGTTTGCCTAGGAATCACAA	19083253	19083285	+	0	33
ECA36_I:14280567:G->A_2727	ECA36	GCCTGAAGGGGGCCAGAATNNNNNNNNNNCTTCAGCTTCCCGATATCCGACGGTAGTGTGAGCTGGGGTGTTTTAGAGGT	I:14280497-14280596/21,19/+	0.996371	I	14280497	14280517	1	GAGCTGGGGTGTTTTAGAGGT	14280578	14280596	1	GCCTGAAGGGGGCCAGAAT	14280518	14280577	ATCCAGGCCCAAAAAAAGGGCTTGGATCCCTGAAAATCTGAAATTTCTAGAAAATATTTG	14280562	14280572	+	0	30
ECA36_II:4106388:G->A_4154	ECA36	GTGTTTGGGGTGGTACTGTNNNNNNNNNNCTTCAGCTTCCCGATATCCGACGGTAGTGTGAGGTCTTGGTGACGTGGGTA	II:4106318-4106417/21,19/+	0.993051	II	4106318	4106338	1	GAGGTCTTGGTGACGTGGGTA	4106399	4106417	1	GTGTTTGGGGTGGTACTGT	4106339	4106398	GAAGAAACATTCTGGAAAACGAGAGAATCTGAAATTGTTTTGTGGTCTTGCGACGAATAA	4106383	4106393	+	0	30
ECA36_III:3384340:A->T_5733	ECA36	AAGCGACGGCGGCGGCACANNNNNNNNNNCTTCAGCTTCCCGATATCCGACGGTAGTGTATGTTAAATGGCGTGGAAAAT	III:3384270-3384369/21,19/+	0.997392	III	3384270	3384290	1	ATGTTAAATGGCGTGGAAAAT	3384351	3384369	1	AAGCGACGGCGGCGGCACA	3384291	3384350	GTGGCCAAAAATGCGAGCCATCACAAAAAAGTCAAGGGAGGAAAACAAAAAAAAACAAAA	3384335	3384345	+	0	30
ECA36_V:11695823:G->A_9401	ECA36	AAGTTGATAAGCCCCGGGGNNNNNNNNNNCTTCAGCTTCCCGATATCCGACGGTAGTGTGAGAAATAAGGAAAATAAGGG	V:11695753-11695852/21,19/+	0.997614	V	11695753	11695773	1	GAGAAATAAGGAAAATAAGGG	11695834	11695852	1	AAGTTGATAAGCCCCGGGG	11695774	11695833	AAATAAGAGAAAATAGAAGAAGAAATAGAAAAAAGAAGAAGACAAATAGGGGACGGCGCA	11695818	11695828	+	0	30
ECA363_I:2855432:G->T_0582	ECA363	GCTTTGTTGTTTGAGCCGCNNNNNNNNNNCTTCAGCTTCCCGATATCCGACGGTAGTGTGGCTGCTTGCGGAGCGGCTCA	I:2855362-2855461/21,19/+	0.992629	I	2855362	2855382	1	GGCTGCTTGCGGAGCGGCTCA	2855443	2855461	1	GCTTTGTTGTTTGAGCCGC	2855383	2855442	AACAAAAAATAATTCATCAATTTCAGAATGCTGGAAAATCAAGCGCTCTGGGCAAGAATA	2855427	2855437	+	0	30
ECA363_II:15266803:A->C_8126	ECA363	AACGAAGCGCCCTGCCAAGNNNNNNNNNNCTTCAGCTTCCCGATATCCGACGGTAGTGTTTGCCGCTAACGGAAATGAAA	II:15266733-15266832/21,19/+	0.998127	II	15266733	15266753	1	TTGCCGCTAACGGAAATGAAA	15266814	15266832	1	AACGAAGCGCCCTGCCAAG	15266754	15266813	TTAAACATTTTTTGGGCAGCAAGAAGAAACAAAAAACAAAAAGAAAGACAAAAGAACAAA	15266798	15266808	+	0	30
ECA363_III:11578112:G->T_11060	ECA363	ACCACGCCCATTTTTCCGTGCGGNNNNNNNNNNCTTCAGCTTCCCGATATCCGACGGTAGTGTAAAGGAGAACAGGTGAA	III:11578046-11578145/17,23/+	0.997289	III	11578046	11578062	12	AAAGGAGAACAGGTGAA	11578123	11578145	6	ACCACGCCCATTTTTCCGTGCGG	11578063	11578122	AAAGGAGAAAAACGAGAAGGAGAATTACGAAAAGGAGAACGACGTAAAGGAGAACACGAA	11578107	11578117	+	0	34
ECA363_IV:16962528:A->T_14602	ECA363	TGAGGAAGCCGATGATGAGNNNNNNNNNNCTTCAGCTTCCCGATATCCGACGGTAGTGTCGATGGGGATGACGTGGTGGA	IV:16962458-16962557/21,19/+	0.99689	IV	16962458	16962478	1	CGATGGGGATGACGTGGTGGA	16962539	16962557	1	TGAGGAAGCCGATGATGAG	16962479	16962538	AAATGATGCGGAAAAAATCGATAAATCTGGAAAAATCGATAAAATCGATAGCGACGACGA	16962523	16962533	+	0	30
ECA369_I:7301895:A->T_2312	ECA369	CCCTCGCACACCAGCCATCNNNNNNNNNNCTTCAGCTTCCCGATATCCGACGGTAGTGTCGTGCAAAACCAGCGCGGGAA	I:7301825-7301924/21,19/+	0.995183	I	7301825	7301845	1	CGTGCAAAACCAGCGCGGGAA	7301906	7301924	1	CCCTCGCACACCAGCCATC	7301846	7301905	GTGTGGAGGTATATTTTTTGTAAAAAAGTAATCAATTTTAGACCAAAAAATTAAAACAAA	7301890	7301900	+	0	30
ECA369_II:11110077:A->C_10550	ECA369	CGAAAAGCACACGGCACACNNNNNNNNNNCTTCAGCTTCCCGATATCCGACGGTAGTGTAGAGCACACATTGGAGCTAGA	II:11110007-11110106/21,19/+	0.994625	II	11110007	11110027	1	AGAGCACACATTGGAGCTAGA	11110088	11110106	1	CGAAAAGCACACGGCACAC	11110028	11110087	TTTGAGTAAATTAGAATATGAATTTAGCCAACAGAAACCAACAACAAAAAAACTATAAAA	11110072	11110082	+	0	30
ECA369_III:9234831:T->C_14531	ECA369	GCAAACACGGCATGCTGCCNNNNNNNNNNCTTCAGCTTCCCGATATCCGACGGTAGTGTACTGTGAAGGGCACGACACTC	III:9234761-9234860/21,19/+	0.99768	III	9234761	9234781	1	ACTGTGAAGGGCACGACACTC	9234842	9234860	1	GCAAACACGGCATGCTGCC	9234782	9234841	ACCAGGAAAATTAAAAAAATAACTACTAATAATAATAAATATTCGACAATAAATAATCAT	9234826	9234836	+	0	30
ECA369_IV:2126314:A->T_17026	ECA369	TTAACTATTCATCGGTGGCNNNNNNNNNNCTTCAGCTTCCCGATATCCGACGGTAGTGTGAGTGATGAGGGGGCGAGATG	IV:2126244-2126343/21,19/+	0.993297	IV	2126244	2126264	1	GAGTGATGAGGGGGCGAGATG	2126325	2126343	1	TTAACTATTCATCGGTGGC	2126265	2126324	AACAACTTAGAGAGTTTGAAGGGACATAGAGGAAGAACAAATTTGAAAAAAAACATGAAA	2126309	2126319	+	0	30
ECA372_I:10364967:A->C_0096	ECA372	ATGGGAAGTCGTTGGGCGGNNNNNNNNNNCTTCAGCTTCCCGATATCCGACGGTAGTGTTCAGATGGAGGACAGAAAGAG	I:10364897-10364996/21,19/+	0.996014	I	10364897	10364917	1	TCAGATGGAGGACAGAAAGAG	10364978	10364996	1	ATGGGAAGTCGTTGGGCGG	10364918	10364977	GAGAACGAACGAGACAAACGAGACAAATTGTGTGTGAACAAAAAATAGGAAAACGAATTT	10364962	10364972	+	0	30
ECA372_II:11316190:A->T_0369	ECA372	TCTCGGTTTGTTCCCGGAATAGNNNNNNNNNNCTTCAGCTTCCCGATATCCGACGGTAGTGTAAAAGGGAAGACGCGACT	II:11316123-11316222/18,22/+	0.997217	II	11316123	11316140	1	AAAAGGGAAGACGCGACT	11316201	11316222	1	TCTCGGTTTGTTCCCGGAATAG	11316141	11316200	AAAAAGTGATGTGAGTTGAGGAAAAGTGGAAGCCGGAAAACCAAAAAATAGAACAAAAAA	11316185	11316195	+	0	33
ECA372_III:11364415:T->A_1258	ECA372	GCAATTTTGGGGGCCAAGTTCNNNNNNNNNNCTTCAGCTTCCCGATATCCGACGGTAGTGTTGCGGCGGCTAATGGAAAT	III:11364347-11364446/19,21/+	0.991481	III	11364347	11364365	1	TGCGGCGGCTAATGGAAAT	11364426	11364446	1	GCAATTTTGGGGGCCAAGTTC	11364366	11364425	TTGAAGGTAGGAAAATCGAATAAAATTGTTTATAGAAAATTCAAAAATTTAAAAAAAATT	11364410	11364420	+	0	32
ECA372_IV:2045158:T->C_1388	ECA372	ACTAAAACGAGCCGCGACGCGACGNNNNNNNNNNCTTCAGCTTCCCGATATCCGACGGTAGTGTGCACACGGGGTTCTGG	IV:2045093-2045192/16,24/+	0.989651	IV	2045093	2045108	6	GCACACGGGGTTCTGG	2045169	2045192	2	ACTAAAACGAGCCGCGACGCGACG	2045109	2045168	CCTTTCTCATTGCATTTTCGAAATTTAAATAATTAAAAAAAAACAAAATTTAGTTTTACA	2045153	2045163	+	0	35
ECA396_I:3015432:A->G_2360	ECA396	AGCGCAAAAACGGGACGCGNNNNNNNNNNCTTCAGCTTCCCGATATCCGACGGTAGTGTTCACGAAAAACACCGAAAAAA	I:3015362-3015461/21,19/+	0.997067	I	3015362	3015382	1	TCACGAAAAACACCGAAAAAA	3015443	3015461	1	AGCGCAAAAACGGGACGCG	3015383	3015442	ACACGAAAAAAGGCCAAAAACTGAAAAAATCATTGCAAATTCGATGAAAACGAGAGAAAA	3015427	3015437	+	0	30
ECA396_II:13495597:A->T_10714	ECA396	TATCCCCGGAAGCCGTCGANNNNNNNNNNCTTCAGCTTCCCGATATCCGACGGTAGTGTGGGGGTTGATGGGGGTAAAAA	II:13495527-13495626/21,19/+	0.998455	II	13495527	13495547	1	GGGGGTTGATGGGGGTAAAAA	13495608	13495626	1	TATCCCCGGAAGCCGTCGA	13495548	13495607	TTTAATAAAAGGATAAACTAACAATTAATTGAACAATTAGAGTAAACCAAAGAATCCCAT	13495592	13495602	+	0	30
ECA396_III:10621403:A->T_15513	ECA396	AGAGGAGTCCGCAGCGCATNNNNNNNNNNCTTCAGCTTCCCGATATCCGACGGTAGTGTGAGAATGCATGCGCCGCGGGA	III:10621333-10621432/21,19/+	0.998932	III	10621333	10621353	1	GAGAATGCATGCGCCGCGGGA	10621414	10621432	1	AGAGGAGTCCGCAGCGCAT	10621354	10621413	AAGAAGGGAAAATGTCAGAAATCACAAAACAAATCAAAATAAAAAATAAAAAATCGTTCG	10621398	10621408	+	0	30
ECA396_IV:1970902:T->G_19550	ECA396	CTTGGCGCTGCCGGAGGTGNNNNNNNNNNCTTCAGCTTCCCGATATCCGACGGTAGTGTGCGGCGGAGGGGGGGCCGGTG	IV:1970832-1970931/21,19/+	0.996398	IV	1970832	1970852	1	GCGGCGGAGGGGGGGCCGGTG	1970913	1970931	1	CTTGGCGCTGCCGGAGGTG	1970853	1970912	GTCTCACTGAAAAATCAATAATTGATTTTTATTCTGAAAAATCGATAATTTACCCTTTTT	1970897	1970907	+	0	30
ED3017_II:7097200:A->G_0150	ED3017	GTAACGTGGAGTGGAAGGAAGNNNNNNNNNNCTTCAGCTTCCCGATATCCGACGGTAGTGTGATGAGACGGCCGATTGTG	II:7097132-7097231/19,21/+	0.986906	II	7097132	7097150	1	GATGAGACGGCCGATTGTG	7097211	7097231	1	GTAACGTGGAGTGGAAGGAAG	7097151	7097210	TTTGCAGTTCCGTACACCGAAAGAATGTTTCCTGATACATTATTATCAGATAAAATATTA	7097195	7097205	+	0	32
ED3017_III:6807400:C->T_0264	ED3017	AAGACGGCGCCGTACGTTTCNNNNNNNNNNCTTCAGCTTCCCGATATCCGACGGTAGTGTGTTGAGAGTGGGGGGGGGGG	III:6807331-6807430/20,20/+	0.992774	III	6807331	6807350	1	GTTGAGAGTGGGGGGGGGGG	6807411	6807430	1	AAGACGGCGCCGTACGTTTC	6807351	6807410	GGGGGGCACCATCCAGCCAGTCGATCGCTCAACTTTTTCGATGTAATCTCTTTTTTGGAA	6807395	6807405	+	0	31
ED3017_V:1262829:A->G_0389	ED3017	GGTTACGACGTGAATTTGGGGNNNNNNNNNNCTTCAGCTTCCCGATATCCGACGGTAGTGTATTTTCGCGGAGAAAAAGC	V:1262761-1262860/19,21/+	0.983333	V	1262761	1262779	1	ATTTTCGCGGAGAAAAAGC	1262840	1262860	1	GGTTACGACGTGAATTTGGGG	1262780	1262839	GTAAAATCGTGGGGATGTACATTCACACAGACACACACATTCAAAAAAGAAAATAATTTA	1262824	1262834	+	0	32
ED3017_X:11778002:A->G_0598	ED3017	GCGGGGTTTGCAGCGGAGACTTNNNNNNNNNNCTTCAGCTTCCCGATATCCGACGGTAGTGTACTGAAAATGAAAACTAA	X:11777935-11778034/18,22/+	0.981513	X	11777935	11777952	1	ACTGAAAATGAAAACTAA	11778013	11778034	1	GCGGGGTTTGCAGCGGAGACTT	11777953	11778012	GTTTAAATTTAACCGAGAGCTGATAAGCGAACGTACCGGAATGAAAACCAGGAAAAATGG	11777997	11778007	+	0	33
ED3049_I:12027316:C->T_0038	ED3049	ATCAGATCCGAATAAGCCAGGACNNNNNNNNNNCTTCAGCTTCCCGATATCCGACGGTAGTGTCCAAATAGGCCAGGACC	I:12027250-12027349/17,23/+	0.984032	I	12027250	12027266	1	CCAAATAGGCCAGGACC	12027327	12027349	11	ATCAGATCCGAATAAGCCAGGAC	12027267	12027326	AAATGGACCAAATGGACCGTTAGATCCAAATAAGCCAGGACCAAATGGACCAAATGGACC	12027280	12027321	+	0	34
ED3049_II:3204961:G->A_0083	ED3049	CTGGCAAATTTCCGGCATTCAANNNNNNNNNNCTTCAGCTTCCCGATATCCGACGGTAGTGTGTGGTCAGTGGGTGTAAT	II:3204925-3205024/18,22/-	0.98227	II	3205007	3205024	1	GTGGTCAGTGGGTGTAAT	3204925	3204946	1	CTGGCAAATTTCCGGCATTCAA	3204947	3205006	TAAAAATTTTCGGCAAATGGGCAATTTTTCAGAATTTAAAATTTCCGGCAAATCGACAAA	3204956	3204966	-	0	37
ED3049_III:11014743:C->T_0123	ED3049	GCATGGATGTGCCTGCCTTNNNNNNNNNNCTTCAGCTTCCCGATATCCGACGGTAGTGTGCTCATGAAAGAGAGCACCAC	III:11014673-11014772/21,19/+	0.983028	III	11014673	11014693	1	GCTCATGAAAGAGAGCACCAC	11014754	11014772	1	GCATGGATGTGCCTGCCTT	11014694	11014753	GATTTTAAGAAAAAATGCCTACCTACGCACCTACATGGCAGGCAGGCAACAAAATTGTAG	11014738	11014748	+	0	30
ED3049_X:16679324:T->A_0225	ED3049	GGGGGGTTTGTCCTCCGCCATNNNNNNNNNNCTTCAGCTTCCCGATATCCGACGGTAGTGTGCACTCAGGAAGAGGCTCT	X:16679257-16679356/19,21/+	0.980932	X	16679257	16679275	1	GCACTCAGGAAGAGGCTCT	16679336	16679356	1	GGGGGGTTTGTCCTCCGCCAT	16679276	16679335	GACTAATGCAAACAACAATACGTCGGTGTGCTCTTTTTTTAATGCTTATCAGTGTTAAAT	16679319	16679329	+	0	33
ED3052_I:7194841:C->T_0050	ED3052	GTGGCTAGGAATGGTTCTTCGAGGNNNNNNNNNNCTTCAGCTTCCCGATATCCGACGGTAGTGTAGCTAGTAAACGGAAC	I:7194776-7194875/16,24/+	0.983984	I	7194776	7194791	1	AGCTAGTAAACGGAAC	7194852	7194875	1	GTGGCTAGGAATGGTTCTTCGAGG	7194792	7194851	AGATTTAGACACAAAAAAAGACGAAAAGAGTGCACTCCCCCCTTCTTAGCGGCTATGCGG	7194836	7194846	+	0	35
ED3052_IV:2165510:T->A_0315	ED3052	CCGTTTTTAGTCACCTGGGACCNNNNNNNNNNCTTCAGCTTCCCGATATCCGACGGTAGTGTAAAGAAAACGTGCCCAAT	IV:2165443-2165542/18,22/+	0.981624	IV	2165443	2165460	1	AAAGAAAACGTGCCCAAT	2165521	2165542	1	CCGTTTTTAGTCACCTGGGACC	2165461	2165520	GTCACCAAAAATAACAAAAAGTCACAAAGTACATGTGGTCAAACCGTGTTACGCAACACC	2165505	2165515	+	0	33
ED3052_V:20525028:C->A_0538	ED3052	GCAGACGAGTTGTGGCTCGNNNNNNNNNNCTTCAGCTTCCCGATATCCGACGGTAGTGTCAACGCAATAACCGGCTGGAA	V:20524958-20525057/21,19/+	0.982472	V	20524958	20524978	1	CAACGCAATAACCGGCTGGAA	20525039	20525057	1	GCAGACGAGTTGTGGCTCG	20524979	20525038	TACAAATAGCGGAAATTGGAATGGCTACTTGTAAGCACATTGCGAAGAACAACTGTTTTT	20525023	20525033	+	0	30
ED3052_X:8969998:A->C_0604	ED3052	CAAGTGACCCGACCCGTCGNNNNNNNNNNCTTCAGCTTCCCGATATCCGACGGTAGTGTTGCGGTAATATTAAACGAAAT	X:8969928-8970027/21,19/+	0.981788	X	8969928	8969948	1	TGCGGTAATATTAAACGAAAT	8970009	8970027	1	CAAGTGACCCGACCCGTCG	8969949	8970008	TGAGAAGAATAGTGACGCATATGCTGAGATAAGAAAAAAAAAATACTTGAGAAAACAATG	8969993	8970003	+	0	30
ED3077_I:2393375:A->T_0027	ED3077	GCGCTGCGACGAGGAAATACNNNNNNNNNNCTTCAGCTTCCCGATATCCGACGGTAGTGTCCGTGGTGACTCGGAGAAGC	I:2393306-2393405/20,20/+	0.991292	I	2393306	2393325	1	CCGTGGTGACTCGGAGAAGC	2393386	2393405	1	GCGCTGCGACGAGGAAATAC	2393326	2393385	GGATGATTTTTTGGAAGAAGAAATTTCCATGGTTTTCGCCAAAAAATCAAAAAATTGGAG	2393370	2393380	+	0	31
ED3077_II:5937487:C->G_0195	ED3077	TCCTTTCCGTGCCACTTCTCNNNNNNNNNNCTTCAGCTTCCCGATATCCGACGGTAGTGTAACGGATTGAACCGGCAGAC	II:5937418-5937517/20,20/+	0.983841	II	5937418	5937437	1	AACGGATTGAACCGGCAGAC	5937498	5937517	1	TCCTTTCCGTGCCACTTCTC	5937438	5937497	AGAAACCGACAAAAGAAGAGAGTAGAAGGTACTACGGGATTAGTAGAGACCATCTTTCCA	5937482	5937492	+	0	31
ED3077_IV:16879562:G->A_0482	ED3077	CGGGATCACATAGTATCAANNNNNNNNNNCTTCAGCTTCCCGATATCCGACGGTAGTGTGAGTGTGGGAAATGGGTGAGG	IV:16879492-16879591/21,19/+	0.98624	IV	16879492	16879512	4	GAGTGTGGGAAATGGGTGAGG	16879573	16879591	4	CGGGATCACATAGTATCAA	16879513	16879572	TAAGAATCATAAAACAAGAAAAATAGAGAATGAAGAATTATAGAGAAAAGAACATGGACT	16879557	16879567	+	0	30
ED3077_X:8913678:T->C_0771	ED3077	TCGTCGTCGTCGATCTTCGNNNNNNNNNNCTTCAGCTTCCCGATATCCGACGGTAGTGTTCAACGTGAACTTGAGCGTCA	X:8913608-8913707/21,19/+	0.991712	X	8913608	8913628	1	TCAACGTGAACTTGAGCGTCA	8913689	8913707	1	TCGTCGTCGTCGATCTTCG	8913629	8913688	AAAACAAGAAGCAGAGCGCGAACTGAAACGGCAGCAGGAGAACGAAGAATCTGGAAATCG	8913673	8913683	+	0	30
EG4724_II:7136618:G->A_0180	EG4724	CTAGTGTTCGTGAATCGAGTGAGCNNNNNNNNNNCTTCAGCTTCCCGATATCCGACGGTAGTGTGAAGAGAAGTCAGCAG	II:7136553-7136652/16,24/+	0.985466	II	7136553	7136568	1	GAAGAGAAGTCAGCAG	7136629	7136652	1	CTAGTGTTCGTGAATCGAGTGAGC	7136569	7136628	AAAATGATACGTCTTCGTTGGGATCTAGACAATACAGAATTGATCCAATGAAGTTAATAG	7136613	7136623	+	0	35
EG4724_III:10636443:T->C_0370	EG4724	CATGCCGTGGCCGGTCGTCNNNNNNNNNNCTTCAGCTTCCCGATATCCGACGGTAGTGTACACCGCGAGAAATTCGCCAG	III:10636373-10636472/21,19/+	0.988001	III	10636373	10636393	1	ACACCGCGAGAAATTCGCCAG	10636454	10636472	1	CATGCCGTGGCCGGTCGTC	10636394	10636453	ATTTTACGCACAAATCTAAAAAAGTTAGTCAAATTTATCAGTTTTTGAATCAGGAAAAAG	10636438	10636448	+	0	30
EG4724_IV:17009681:A->G_0675	EG4724	GGAATAAACCCCGCCCATANNNNNNNNNNCTTCAGCTTCCCGATATCCGACGGTAGTGTCGGTTCACTACGATATAAAAA	IV:17009611-17009710/21,19/+	0.992997	IV	17009611	17009631	1	CGGTTCACTACGATATAAAAA	17009692	17009710	1	GGAATAAACCCCGCCCATA	17009632	17009691	AGACCACAAAAACCGATAAATATAAGCAAAATAGAGAAAAAAAAATCCAAGAAATGGGCA	17009676	17009686	+	0	30
EG4724_X:14548706:A->T_0884	EG4724	CGCCGCGCCATCTCCGATTNNNNNNNNNNCTTCAGCTTCCCGATATCCGACGGTAGTGTATGGTAGAGGGGGAAAGGAGT	X:14548636-14548735/21,19/+	0.986873	X	14548636	14548656	1	ATGGTAGAGGGGGAAAGGAGT	14548717	14548735	1	CGCCGCGCCATCTCCGATT	14548657	14548716	ATTGTGGTTATAATTGAGCAATCATTGGAATATCGTATACATGTCACTCAATCCAAATAC	14548701	14548711	+	0	30
EG4725_I:39226:C->A_0001	EG4725	GATTCCGCGGAATCCGACGNNNNNNNNNNCTTCAGCTTCCCGATATCCGACGGTAGTGTCGGCCACAGCTTGCCCGATAG	I:39156-39255/21,19/+	0.98877	I	39156	39176	1	CGGCCACAGCTTGCCCGATAG	39237	39255	1	GATTCCGCGGAATCCGACG	39177	39236	GAGCACACGGGCATACTGTTTCAACAAAAATTCGAAAAAATTGGAAAATCCCGGAATTTT	39221	39231	+	0	30
EG4725_II:14784049:A->C_0335	EG4725	CACCAAGTTCGTTTGCCTTTTTACNNNNNNNNNNCTTCAGCTTCCCGATATCCGACGGTAGTGTGTGGATATTGCACGCG	II:14783984-14784083/16,24/+	0.992346	II	14783984	14783999	1	GTGGATATTGCACGCG	14784060	14784083	1	CACCAAGTTCGTTTGCCTTTTTAC	14784000	14784059	CAGAAAAAGTGGGAAACGTTTGAACAAAATGTGAAAAAAAAATTGGAAAAGATGCACACA	14784044	14784054	+	0	35
EG4725_III:12433227:C->A_0601	EG4725	ATCTAAAAACCCAACACGCNNNNNNNNNNCTTCAGCTTCCCGATATCCGACGGTAGTGTGCTATGTGCCAACTAAAAAAC	III:12433157-12433256/21,19/+	0.993403	III	12433157	12433177	1	GCTATGTGCCAACTAAAAAAC	12433238	12433256	1	ATCTAAAAACCCAACACGC	12433178	12433237	CAAAAAACCAAAAAACCAAAAAACCAAAAAACCAAAAAACCAAAATAGCCAAAAAAAAAA	12433222	12433232	+	0	30
EG4725_X:13347083:A->T_2067	EG4725	GCAGGAGTAACTGTGGAGACNNNNNNNNNNCTTCAGCTTCCCGATATCCGACGGTAGTGTGGGGTGTAAATCGTATTGGC	X:13347057-13347156/20,20/-	0.985396	X	13347137	13347156	1	GGGGTGTAAATCGTATTGGC	13347057	13347076	1	GCAGGAGTAACTGTGGAGAC	13347077	13347136	TCTAAAAATGGGAAAAGCTATGAATTCTTCTAGAAAGAAGGAACATTTTTTTTTTGGAAT	13347078	13347088	-	0	27
GXW1_II:12402155:A->G_0303	GXW1	AGTCTCCGAAGCACCGCCCNNNNNNNNNNCTTCAGCTTCCCGATATCCGACGGTAGTGTTTGTAGAACGACGAACAGAAC	II:12402085-12402184/21,19/+	0.988293	II	12402085	12402105	1	TTGTAGAACGACGAACAGAAC	12402166	12402184	1	AGTCTCCGAAGCACCGCCC	12402106	12402165	CTGGAAAGTTTTGAAGCCAATAACTATGAAATGAATAATTTTTAAAAAAATTTCCCACTA	12402150	12402160	+	0	30
GXW1_III:2725552:G->A_0397	GXW1	CCGTAACGTCTTAAAGGCACNNNNNNNNNNCTTCAGCTTCCCGATATCCGACGGTAGTGTGCGGTGAAAAGTGGATTTTG	III:2725483-2725582/20,20/+	0.982163	III	2725483	2725502	1	GCGGTGAAAAGTGGATTTTG	2725563	2725582	1	CCGTAACGTCTTAAAGGCAC	2725503	2725562	GACGGGAAAATGCATTTAGTGTGATTTAAAAGCTTTAAAATTAAAAAAAGAGAAGAACTA	2725547	2725557	+	0	31
GXW1_V:18684493:A->G_0830	GXW1	CACTGGCGCATTTCTAGTGCCTNNNNNNNNNNCTTCAGCTTCCCGATATCCGACGGTAGTGTCAAGCCTCCAAATCAAAA	V:18684426-18684525/18,22/+	0.981462	V	18684426	18684443	1	CAAGCCTCCAAATCAAAA	18684504	18684525	1	CACTGGCGCATTTCTAGTGCCT	18684444	18684503	ACAGAGTAAAAATTCGAAATCCTCGAGGTCGAATTACTCGAAAACGGGTATAATGTGCGC	18684488	18684498	+	0	33
GXW1_X:12028861:C->T_0941	GXW1	TCAACGGATCATCATTGCCGNNNNNNNNNNCTTCAGCTTCCCGATATCCGACGGTAGTGTTTCCAACACACATGTCCATC	X:12028792-12028891/20,20/+	0.9828	X	12028792	12028811	1	TTCCAACACACATGTCCATC	12028872	12028891	1	TCAACGGATCATCATTGCCG	12028812	12028871	AATGAGCTCAATTGAAAATCGAAATCTGAAAAAGTCATTGATAAAACAGCATCAGCAACA	12028856	12028866	+	0	31
JU1212_I:11540544:C->G_0174	JU1212	TCCTAAGCCTCAGCCTAAGNNNNNNNNNNCTTCAGCTTCCCGATATCCGACGGTAGTGTTAGGCCTAAGCCTCAGCCTAA	I:11540474-11540573/21,19/+	0.991735	I	11540474	11540494	4	TAGGCCTAAGCCTCAGCCTAA	11540555	11540573	3	TCCTAAGCCTCAGCCTAAG	11540495	11540554	GAACAAGCCAAAGTCTAAGCCAAAGCAAAAGCCAAAGCCAAAACCAAAGCATAAGCTTAA	11540539	11540549	+	0	30
JU1212_II:10563991:T->C_0567	JU1212	ACCCGATCGATAGACGGAGAACNNNNNNNNNNCTTCAGCTTCCCGATATCCGACGGTAGTGTTCAGCGTTTGGGTCTCGA	II:10563924-10564023/18,22/+	0.984582	II	10563924	10563941	1	TCAGCGTTTGGGTCTCGA	10564002	10564023	1	ACCCGATCGATAGACGGAGAAC	10563942	10564001	AACGATATGCCGTTAGTAAATGCAGCACTTTGTAGATCGATAAAAATGATTTGCAGCATC	10563986	10563996	+	0	33
JU1212_III:8737128:A->T_0615	JU1212	CGCCGCACTCTTGCATGTCNNNNNNNNNNCTTCAGCTTCCCGATATCCGACGGTAGTGTAATCAGAAAAACAACCGTTCG	III:8737058-8737157/21,19/+	0.997871	III	8737058	8737078	1	AATCAGAAAAACAACCGTTCG	8737139	8737157	1	CGCCGCACTCTTGCATGTC	8737079	8737138	AAACTGAAAACAAATGAAAAATTACAAAAAATATAACAGGAAAAAAGTCAACAAAAACTG	8737123	8737133	+	0	30
JU1212_V:9120137:A->C_0768	JU1212	CGAATCACGTATTCCGGTTNNNNNNNNNNCTTCAGCTTCCCGATATCCGACGGTAGTGTACATGACACGCAACAATTGAG	V:9120067-9120166/21,19/+	0.990117	V	9120067	9120087	1	ACATGACACGCAACAATTGAG	9120148	9120166	1	CGAATCACGTATTCCGGTT	9120088	9120147	GAACCAGCAACAAGTAGTTACAACAAAAACAGAAGAGGAAAATGATCAAAGAATGAAGAA	9120132	9120142	+	0	30
JU1400_I:2752711:A->G_0030	JU1400	AAACCTCGGCCACCAGGAANNNNNNNNNNCTTCAGCTTCCCGATATCCGACGGTAGTGTTGCACAATGAGTTCAAAAAGC	I:2752641-2752740/21,19/+	0.989155	I	2752641	2752661	1	TGCACAATGAGTTCAAAAAGC	2752722	2752740	1	AAACCTCGGCCACCAGGAA	2752662	2752721	GCCGTAGCCATAATAGCCGAAAAAAAAAACAGAAATCACAGCGTGGCCTAGAAAAATATG	2752706	2752716	+	0	30
JU1400_II:4073439:A->T_0295	JU1400	GGTTGAGCTGGCTCTTCTTNNNNNNNNNNCTTCAGCTTCCCGATATCCGACGGTAGTGTGGGAGGGGGGGGAATGTTTTG	II:4073406-4073505/21,19/-	0.989816	II	4073485	4073505	1	GGGAGGGGGGGGAATGTTTTG	4073406	4073424	1	GGTTGAGCTGGCTCTTCTT	4073425	4073484	AATTTTCACAAAGAGAATGAAGGAAGAGCTAACTCGTGGTGGCGGTGAAGGCAACGCCCG	4073434	4073444	-	0	34
JU1400_III:11372974:C->T_0900	JU1400	TGTGTGGGGATAAATTATGCGNNNNNNNNNNCTTCAGCTTCCCGATATCCGACGGTAGTGTACGGCAAAGAAAAAGGCAG	III:11372906-11373005/19,21/+	0.990274	III	11372906	11372924	1	ACGGCAAAGAAAAAGGCAG	11372985	11373005	1	TGTGTGGGGATAAATTATGCG	11372925	11372984	ACAACTTCATCGAAGGCAACAAGAGAAAAAAGAGAAAACATGTAAGAAACCACCCGGTAG	11372969	11372979	+	0	32
JU1400_X:2853367:T->A_1277	JU1400	CCACACACCACGTGAAGCGCNNNNNNNNNNCTTCAGCTTCCCGATATCCGACGGTAGTGTGGTGAGACGCAGAGTTCTCG	X:2853298-2853397/20,20/+	0.993406	X	2853298	2853317	1	GGTGAGACGCAGAGTTCTCG	2853378	2853397	1	CCACACACCACGTGAAGCGC	2853318	2853377	TCAAATTTTTAAAGGCAAAAAATTCCCGCATTTTTTGTAGATCAAACCCTGATGGCACAG	2853362	2853372	+	0	31
JU1581_I:8999758:C->T_0517	JU1581	GCGCATTACTGCACGGCACNNNNNNNNNNCTTCAGCTTCCCGATATCCGACGGTAGTGTAAAGAAGAGGTTGAGGGAAGA	I:8999688-8999787/21,19/+	0.995374	I	8999688	8999708	1	AAAGAAGAGGTTGAGGGAAGA	8999769	8999787	1	GCGCATTACTGCACGGCAC	8999709	8999768	TGGAAGAAGAGAAAAAGAAAAAGAAGATAACCGGACAGCTACGTAAGCACTCATATAAGA	8999753	8999763	+	0	30
JU1581_II:11292203:G->A_0721	JU1581	TGTCGAGACCGACCTGGCATCNNNNNNNNNNCTTCAGCTTCCCGATATCCGACGGTAGTGTTTATGCGGTGCAGACGCTT	II:11292172-11292271/19,21/-	0.980759	II	11292253	11292271	1	TTATGCGGTGCAGACGCTT	11292172	11292192	1	TGTCGAGACCGACCTGGCATC	11292193	11292252	AATAATGCGACGGCGCAGTGGAAGTGAGTTCTGAAAACCAAGTTTGGCACCGAAAATACG	11292198	11292208	-	0	32
JU1581_V:18309531:C->T_0943	JU1581	CTGCTGGACGATTTGGCCGTTGTGNNNNNNNNNNCTTCAGCTTCCCGATATCCGACGGTAGTGTTTCGAAGCGTATCGGT	V:18309466-18309565/16,24/+	0.982538	V	18309466	18309481	1	TTCGAAGCGTATCGGT	18309542	18309565	1	CTGCTGGACGATTTGGCCGTTGTG	18309482	18309541	TGCAGTGTCAAACTCAATAATGGATTGAAGAAAGTTATCGAAAAGAAGCCTTTGGATGCT	18309526	18309536	+	0	35
JU1581_X:15153830:C->T_1083	JU1581	TCCCAAGGACATGCACGTCNNNNNNNNNNCTTCAGCTTCCCGATATCCGACGGTAGTGTACATTTGCTTTTTCCCAGCGA	X:15153760-15153859/21,19/+	0.991976	X	15153760	15153780	1	ACATTTGCTTTTTCCCAGCGA	15153841	15153859	1	TCCCAAGGACATGCACGTC	15153781	15153840	GCCAAAAAAAAAATGGAAAAAGATCTGAGAGCATTTTTGGAAACACTGCCCAAGAAATAT	15153825	15153835	+	0	30
JU1652_I:8786203:C->G_0049	JU1652	GTTGATGAGGGAAGAAAACNNNNNNNNNNCTTCAGCTTCCCGATATCCGACGGTAGTGTATGGTATGAAGGAGGAAGGGA	I:8786133-8786232/21,19/+	0.98999	I	8786133	8786153	1	ATGGTATGAAGGAGGAAGGGA	8786214	8786232	1	GTTGATGAGGGAAGAAAAC	8786154	8786213	ACAAAAACAAATTGGTGGAATGGAAGAGAGAAGAAAATAAATGAATAAACAAATAAACAT	8786198	8786208	+	0	30
JU1652_III:12677731:C->T,G_1197	JU1652	TCCTCGCGGTTGATTGTTTGNNNNNNNNNNCTTCAGCTTCCCGATATCCGACGGTAGTGTGGATTCCGGCGAAAAGTTAG	III:12677662-12677761/20,20/+	0.982849	III	12677662	12677681	1	GGATTCCGGCGAAAAGTTAG	12677742	12677761	1	TCCTCGCGGTTGATTGTTTG	12677682	12677741	AGTTATTCGAGTTTTGGAGTAAAAAAAAACAAAAAAAAAATCTAAAATTCGGTTTTTGAC	12677726	12677736	+	0	31
JU1652_IV:13210351:G->C_1309	JU1652	CCTTTTCCCAGGGAAGGGTGCTGNNNNNNNNNNCTTCAGCTTCCCGATATCCGACGGTAGTGTGGCGCCTCAGCCAAAAA	IV:13210285-13210384/17,23/+	0.982182	IV	13210285	13210301	1	GGCGCCTCAGCCAAAAA	13210362	13210384	1	CCTTTTCCCAGGGAAGGGTGCTG	13210302	13210361	AGTGCAAAATGGTCAGGAAAAAACTTGGCCACCGATTTTAGACGGCCACGACGCACAAGA	13210346	13210356	+	0	34
JU1652_V:10767051:G->A_1404	JU1652	CATGGATGGTTTCGTCTTGGTTGTGNNNNNNNNNNCTTCAGCTTCCCGATATCCGACGGTAGTGTTCAACAAACTACCTAC	V:10766986-10767085/16,25/+	0.980852	V	10766986	10767001	1	TCAACAAACTACCTAC	10767061	10767085	1	CATGGATGGTTTCGTCTTGGTTGTG	10767002	10767060	AATGGCATGCAATTGATACACAATGTCATTTAATGTATTATTCTGCATGGCCATGGTAT	10767046	10767056	+	0	35
JU1793_II:2945994:C->T_0041	JU1793	ATCTAAACGCCCTGATCGGCCCTGNNNNNNNNNNCTTCAGCTTCCCGATATCCGACGGTAGTGTAACGCCCTGAAAACCC	II:2945933-2946032/16,24/+	0.983878	II	2945933	2945948	1	AACGCCCTGAAAACCC	2946009	2946032	1	ATCTAAACGCCCTGATCGGCCCTG	2945949	2946008	CAAACGGCCAATAAGGCCTAAAAAGCCTATACGCCCCAAAGGACCCACACGGCCTAGAAA	2945989	2945999	+	0	39
JU1793_II:3806941:A->G_0047	JU1793	AAAGAAACCAACCAGAGCCTCCNNNNNNNNNNCTTCAGCTTCCCGATATCCGACGGTAGTGTGACATCGTCTGTTGAGAG	II:3806874-3806973/18,22/+	0.986113	II	3806874	3806891	1	GACATCGTCTGTTGAGAG	3806952	3806973	1	AAAGAAACCAACCAGAGCCTCC	3806892	3806951	CGGCGGCAAGGCGGAAATCTGAATTAAATATTAATTTTTCAGGATATACATAAACTGTAA	3806936	3806946	+	0	33
JU1793_V:1692047:T->C_0236	JU1793	GTGATGGATCGGGATGGGTTGGGNNNNNNNNNNCTTCAGCTTCCCGATATCCGACGGTAGTGTAAACGATGCTTCAGAAA	V:1692017-1692116/17,23/-	0.984272	V	1692100	1692116	1	AAACGATGCTTCAGAAA	1692017	1692039	1	GTGATGGATCGGGATGGGTTGGG	1692040	1692099	ATCTAATTTTTACAGATCGACGCGACGACGAAGATCAGGATAGGTGGATCGGAATGGATC	1692042	1692052	-	0	31
JU1793_V:4157532:G->C,A_0307	JU1793	TAGGGAGGAGAAGCGACAAGTGTTNNNNNNNNNNCTTCAGCTTCCCGATATCCGACGGTAGTGTTGTCAGAGCGAGTTGA	V:4157467-4157566/16,24/+	0.983682	V	4157467	4157482	1	TGTCAGAGCGAGTTGA	4157543	4157566	1	TAGGGAGGAGAAGCGACAAGTGTT	4157483	4157542	GAGAAGTGATAAGAAATGGAAGAATACTGATAAAAAGAAGATAAGAAGGGAATATCTTGT	4157527	4157537	+	0	35
JU1896_I:5502853:G->A_0065	JU1896	GCGAGCTACGATAGCTGGGNNNNNNNNNNCTTCAGCTTCCCGATATCCGACGGTAGTGTACAGGCAGTCGGAAAAAGTGA	I:5502783-5502882/21,19/+	0.990656	I	5502783	5502803	1	ACAGGCAGTCGGAAAAAGTGA	5502864	5502882	1	GCGAGCTACGATAGCTGGG	5502804	5502863	AAATGTTCAAAACAAAGAGATAAAATTAAAATGAAACTAGGTTACGGTAGTATGTGATAT	5502848	5502858	+	0	30
JU1896_II:4600308:A->T_0489	JU1896	TTATTTTCCCTTACCGTTGNNNNNNNNNNCTTCAGCTTCCCGATATCCGACGGTAGTGTCCTTTGGACTGATCGAATTAA	II:4600238-4600337/21,19/+	0.987229	II	4600238	4600258	1	CCTTTGGACTGATCGAATTAA	4600319	4600337	1	TTATTTTCCCTTACCGTTG	4600259	4600318	AAAAAAAGATAGAAAAAAAGATGATTTTGCAGGAAAAAAAAGAACAAAAAGAAGAAGATA	4600303	4600313	+	0	30
JU1896_IV:13794865:A->G_0782	JU1896	TCCATTCTTTCTGTCGGCGNNNNNNNNNNCTTCAGCTTCCCGATATCCGACGGTAGTGTTCGTTGGGCTAATCTTCCAGA	IV:13794795-13794894/21,19/+	0.983544	IV	13794795	13794815	1	TCGTTGGGCTAATCTTCCAGA	13794876	13794894	1	TCCATTCTTTCTGTCGGCG	13794816	13794875	TTTGGCACTTATTAAAGAGCGAAATAAGCCAACTGATGCTGTTAAAAAGATCAAACAAGC	13794860	13794870	+	0	30
JU1896_V:10431734:T->C_0892	JU1896	AAGGGGTAACCCCCGAGCNNNNNNNNNNCTTCAGCTTCCCGATATCCGACGGTAGTGTGGGCATGGGACAAGTGGCATTC	V:10431663-10431762/22,18/+	0.995338	V	10431663	10431684	1	GGGCATGGGACAAGTGGCATTC	10431745	10431762	1	AAGGGGTAACCCCCGAGC	10431685	10431744	GGCAAAATGCCGAAAATATTATTTTGCCGCCAACCCCTGATTGAATCGGTATTTAATTCT	10431729	10431739	+	0	29
JU2001_I:14297638:A->T_0187	JU2001	GGACTGTTCGGTGGGTTGGNNNNNNNNNNCTTCAGCTTCCCGATATCCGACGGTAGTGTAAGCAAACCAGCCGGTATTGC	I:14297568-14297667/21,19/+	0.988903	I	14297568	14297588	1	AAGCAAACCAGCCGGTATTGC	14297649	14297667	1	GGACTGTTCGGTGGGTTGG	14297589	14297648	TACCAATATTGGGAATTAGGTACCCAGACGGACAATATATGCAAAGCTTAGATATGAGGA	14297631	14297643	+	0	30
JU2001_II:308380:T->C_0291	JU2001	CTCACGCCGACGCTCTGTCCACNNNNNNNNNNCTTCAGCTTCCCGATATCCGACGGTAGTGTTCAGTGCAACCGACCCAA	II:308313-308412/18,22/+	0.995063	II	308313	308330	2	TCAGTGCAACCGACCCAA	308391	308412	1	CTCACGCCGACGCTCTGTCCAC	308331	308390	AACAGACACCAACAGATCACAAAGAGTGAGTCAAGTAAAAAAAAGATTTTAAGTGCGAGA	308375	308385	+	0	33
JU2001_V:15526581:G->A_2950	JU2001	CCCGGGAAACAAGAGCCAANNNNNNNNNNCTTCAGCTTCCCGATATCCGACGGTAGTGTATTTAGGGTCGAAGTAGAAGA	V:15526511-15526610/21,19/+	0.998137	V	15526511	15526531	1	ATTTAGGGTCGAAGTAGAAGA	15526592	15526610	1	CCCGGGAAACAAGAGCCAA	15526532	15526591	AGAAGAAGAAGAAGGAGCAGGAAAAAAGAAAGAAGAAGACGAAGAAAAGGAAGACATGAC	15526576	15526586	+	0	30
JU2001_X:9040599:A->T_3337	JU2001	AATTCAGAGCAACCCGCCTAAAACNNNNNNNNNNCTTCAGCTTCCCGATATCCGACGGTAGTGTGCATAGGCTGGCTTGC	X:9040534-9040633/16,24/+	0.99817	X	9040534	9040549	1	GCATAGGCTGGCTTGC	9040610	9040633	1	AATTCAGAGCAACCCGCCTAAAAC	9040550	9040609	AAAAATCCGAAAATTGAATCAACAGGTATACGAAGCATGAAAACATAAAATAAAATGAAT	9040594	9040604	+	0	35
JU2007_I:5430397:C->T_0248	JU2007	CGCAGGTCATGGTGGACACGNNNNNNNNNNCTTCAGCTTCCCGATATCCGACGGTAGTGTGGAAAAGAAGTAGAAGCGGT	I:5430328-5430427/20,20/+	0.986151	I	5430328	5430347	1	GGAAAAGAAGTAGAAGCGGT	5430408	5430427	1	CGCAGGTCATGGTGGACACG	5430348	5430407	TCCTGTGCCCGATGAAAAAGATCAAAATGAACATCATGAACATTCGTCTCATGGATCACA	5430392	5430402	+	0	31
JU2007_II:12372731:C->T_0541	JU2007	CCGCCCAACTAATCCTCTCNNNNNNNNNNCTTCAGCTTCCCGATATCCGACGGTAGTGTTGAAGTGTCTTTTCTACCCCT	II:12372661-12372760/21,19/+	0.990258	II	12372661	12372681	1	TGAAGTGTCTTTTCTACCCCT	12372742	12372760	1	CCGCCCAACTAATCCTCTC	12372682	12372741	CTAGTCTAAAGAATATTGACGTGAGCATGAGCAATTCATCAAAAATTCACAGCGAAAAAG	12372726	12372736	+	0	30
JU2007_III:11370145:T->C_0695	JU2007	CAGTAAGGGGTGGAGGGTCNNNNNNNNNNCTTCAGCTTCCCGATATCCGACGGTAGTGTTAGGAGGACAAGGAAATAAGG	III:11370075-11370174/21,19/+	0.991668	III	11370075	11370095	1	TAGGAGGACAAGGAAATAAGG	11370156	11370174	1	CAGTAAGGGGTGGAGGGTC	11370096	11370155	CCAAATATTTATTTATGAATAAGAAGAAGGGGGGAAACAATAGTGTATATATTAAGGGAT	11370140	11370150	+	0	30
JU2007_IV:1822603:G->C_0728	JU2007	ACTTGTGGAGGGTTCTACTTGNNNNNNNNNNCTTCAGCTTCCCGATATCCGACGGTAGTGTGGAAGATGAGTGATGGGAA	IV:1822535-1822634/19,21/+	0.994034	IV	1822535	1822553	1	GGAAGATGAGTGATGGGAA	1822614	1822634	1	ACTTGTGGAGGGTTCTACTTG	1822554	1822613	GAGGAGGAGGAAGCAAAAAAGAACACTAACAATAATAGAAATGACATATGGAATACTTTT	1822598	1822608	+	0	32
JU2017_I:13367225:T->C_0323	JU2017	TGCGGCGCCGATTTTCTGGNNNNNNNNNNCTTCAGCTTCCCGATATCCGACGGTAGTGTAAAAAATCTGGAAAAAGCCGG	I:13367155-13367254/21,19/+	0.991935	I	13367155	13367175	1	AAAAAATCTGGAAAAAGCCGG	13367236	13367254	1	TGCGGCGCCGATTTTCTGG	13367176	13367235	AAATTATCAAAATTGTTCACTAAAATCGAAAAAAAAAAGAGGAACGTCATTTTGCAAGCT	13367220	13367230	+	0	30
JU2017_II:12879814:C->A_1173	JU2017	GCTATTTGCGCCGGGGGGGNNNNNNNNNNCTTCAGCTTCCCGATATCCGACGGTAGTGTCGGAAAAATGCAAAGAAAAAC	II:12879744-12879843/21,19/+	0.99465	II	12879744	12879764	1	CGGAAAAATGCAAAGAAAAAC	12879825	12879843	1	GCTATTTGCGCCGGGGGGG	12879765	12879824	GAATCAAAGTCAAAGGTTCAACAAAACGCCAAAAATCCTGTTGATTTCACCTCAAAAAAA	12879809	12879819	+	0	30
JU2017_IV:2981713:A->G_1419	JU2017	GGAAGGTAGGTAGGTATGTAGNNNNNNNNNNCTTCAGCTTCCCGATATCCGACGGTAGTGTCAGAGGGTGGCATTGGGGT	IV:2981645-2981744/19,21/+	0.994855	IV	2981645	2981663	1	CAGAGGGTGGCATTGGGGT	2981724	2981744	1	GGAAGGTAGGTAGGTATGTAG	2981664	2981723	ATATACCTAAATAGGCAAAAAAAAATCTAGTAGGTAGGAAGGAAGGTAGATAGGAAGGTA	2981701	2981718	+	0	32
JU2017_V:1425052:C->G_2539	JU2017	GGCCGCCGCTAGCAATCTGGNNNNNNNNNNCTTCAGCTTCCCGATATCCGACGGTAGTGTGAGATGCAGAGCTAAAAGTT	V:1424983-1425082/20,20/+	0.984563	V	1424983	1425002	1	GAGATGCAGAGCTAAAAGTT	1425063	1425082	1	GGCCGCCGCTAGCAATCTGG	1425003	1425062	AAGTTCTCTAATAAAAATTTAATTATAAATATCATAAAATACACCAGCTCAGTCGGTAGT	1425047	1425057	+	0	31
JU2106_II:10765509:T->C_0145	JU2106	GGAGCAAGTAGATTTGAGAGCTGTNNNNNNNNNNCTTCAGCTTCCCGATATCCGACGGTAGTGTCATATGTTTTGGTGGG	II:10765444-10765543/16,24/+	0.984321	II	10765444	10765459	1	CATATGTTTTGGTGGG	10765520	10765543	1	GGAGCAAGTAGATTTGAGAGCTGT	10765460	10765519	ACGAATGAGAATAGAAAACAGGGATGACACATAAATTTGTTAGTGAAACTTGGAGAACAA	10765504	10765514	+	0	35
JU2106_IV:5547022:A->G_0289	JU2106	GATGACGGGCCGTTCCGCGNNNNNNNNNNCTTCAGCTTCCCGATATCCGACGGTAGTGTTCGGGACAATGCTATCACGGC	IV:5546952-5547051/21,19/+	0.987787	IV	5546952	5546972	1	TCGGGACAATGCTATCACGGC	5547033	5547051	1	GATGACGGGCCGTTCCGCG	5546973	5547032	TGGGAAGGAGGTAACGAGATAAAAAAGGAGAATAAAGTATTTATAAAGCATCTTTTTTCA	5547017	5547027	+	0	30
JU2106_V:6225292:G->A_0411	JU2106	TCCGGTGACCGTGACGGAATNNNNNNNNNNCTTCAGCTTCCCGATATCCGACGGTAGTGTTGGAAGATATATCTGCCAAG	V:6225223-6225322/20,20/+	0.983791	V	6225223	6225242	1	TGGAAGATATATCTGCCAAG	6225303	6225322	1	TCCGGTGACCGTGACGGAAT	6225243	6225302	CGGAAGAAGAAAGAAACACTGGTGGAAATTGAAAAAAGAAAGTAGTGGAGTACTGTAGAA	6225287	6225297	+	0	31
JU2106_X:15664829:G->A_0594	JU2106	GGGAGTTCAGAAATCTTGGCAGNNNNNNNNNNCTTCAGCTTCCCGATATCCGACGGTAGTGTAGGGGGGATCGAAAAGAA	X:15664798-15664897/18,22/-	0.98215	X	15664880	15664897	1	AGGGGGGATCGAAAAGAA	15664798	15664819	1	GGGAGTTCAGAAATCTTGGCAG	15664820	15664879	AAATGACAAATCGGTTTGGCCATTCGGTGGGAAACAGGAACCTCCAATGACGTTTCGAAT	15664824	15664834	-	0	32
JU2234_II:9013382:G->A_0205	JU2234	AAAAACGGCTGTTGGTGCTCACNNNNNNNNNNCTTCAGCTTCCCGATATCCGACGGTAGTGTCCGAACGGACAGCGGGGG	II:9013315-9013414/18,22/+	0.982332	II	9013315	9013332	1	CCGAACGGACAGCGGGGG	9013393	9013414	1	AAAAACGGCTGTTGGTGCTCAC	9013333	9013392	TGAATAAATGAAGGAAAATAAGAGGGCGGGAGGAGAAAATAGGGTGTTCGCCCCCCGAAA	9013377	9013387	+	0	33
JU2234_III:6140046:A->C_0341	JU2234	ACTAAGAAGAAGCCGGAGTGNNNNNNNNNNCTTCAGCTTCCCGATATCCGACGGTAGTGTAAACTCGTGGGAGCAACAAA	III:6139977-6140076/20,20/+	0.989337	III	6139977	6139996	1	AAACTCGTGGGAGCAACAAA	6140057	6140076	1	ACTAAGAAGAAGCCGGAGTG	6139997	6140056	ATAAAAGAAAAACGGAGGCCCTTAGAGTAGGCGAAGAAGACGAATAAGAAAAAGAAGACG	6140041	6140051	+	0	31
JU2234_IV:12392257:G->A_0927	JU2234	AGCACTGGCTGTCGGGGTTCNNNNNNNNNNCTTCAGCTTCCCGATATCCGACGGTAGTGTAACAAAAATGAAGGAGTTCA	IV:12392188-12392287/20,20/+	0.992702	IV	12392188	12392207	1	AACAAAAATGAAGGAGTTCA	12392268	12392287	1	AGCACTGGCTGTCGGGGTTC	12392208	12392267	TATGACGTAGTAAAATAAATAGATTCAAAAGAAGAGAGAAACACAACAGGAATTTAATAA	12392252	12392262	+	0	31
JU2234_V:10570139:A->C_1109	JU2234	CCCAGCTCTGTCCTAAACANNNNNNNNNNCTTCAGCTTCCCGATATCCGACGGTAGTGTTCTATCTTTCGGCTGTTCGTT	V:10570069-10570168/21,19/+	0.992932	V	10570069	10570089	1	TCTATCTTTCGGCTGTTCGTT	10570150	10570168	1	CCCAGCTCTGTCCTAAACA	10570090	10570149	CGCTCCGTCGTAAAGTGATTGCAAAAAAAAGAAAAAGTATAACAGAAACAACTGCGACTA	10570134	10570144	+	0	30
JU2316_I:3851925:C->A_0010	JU2316	CAGCCACGTGGATCCTGCTCNNNNNNNNNNCTTCAGCTTCCCGATATCCGACGGTAGTGTACGGTTCCAGTACTGATGTC	I:3851856-3851955/20,20/+	0.989219	I	3851856	3851875	1	ACGGTTCCAGTACTGATGTC	3851936	3851955	2	CAGCCACGTGGATCCTGCTC	3851876	3851935	AATCGTGGAAGCCGAATCACAAGTGAACTAAAGAAGAAAGAAAGCAATGCAGTCAGAGGA	3851920	3851930	+	0	31
JU2316_II:11100616:G->A_0131	JU2316	CGAGGGAAGAGGGGAGAGGNNNNNNNNNNCTTCAGCTTCCCGATATCCGACGGTAGTGTGGGCGAGAGGTATTTTTGGGC	II:11100546-11100645/21,19/+	0.987582	II	11100546	11100566	1	GGGCGAGAGGTATTTTTGGGC	11100627	11100645	1	CGAGGGAAGAGGGGAGAGG	11100567	11100626	GAAACAAATAGAAACGAAGAACCCGCGTAGGTCTCAGGGGGGAGCCGACGATAGTTGATT	11100611	11100621	+	0	30
JU2316_IV:5088773:G->A_0290	JU2316	CCGTCCTCCAGCGGCACATTTNNNNNNNNNNCTTCAGCTTCCCGATATCCGACGGTAGTGTTCTCCTCATCGTTAAGCCC	IV:5088705-5088804/19,21/+	0.985448	IV	5088705	5088723	1	TCTCCTCATCGTTAAGCCC	5088784	5088804	1	CCGTCCTCCAGCGGCACATTT	5088724	5088783	AAACATAGAATCATCAATAGGATATGCTGAAAATTGCCGAACTGCTTGGGACTGAAGAGC	5088768	5088778	+	0	32
JU2316_V:3840034:C->T,A_0362	JU2316	GCGGTTTGAGGCATCCATTTCACGNNNNNNNNNNCTTCAGCTTCCCGATATCCGACGGTAGTGTAGGCGGTTGTCTTCTG	V:3839969-3840068/16,24/+	0.991519	V	3839969	3839984	2	AGGCGGTTGTCTTCTG	3840045	3840068	1	GCGGTTTGAGGCATCCATTTCACG	3839985	3840044	AAATTGCACTTTTTGAAATGAAATTCCCTGAATTAAAATCAACAAAACTCACTCAAAAGT	3840026	3840039	+	0	35
JU2464_I:1598538:G->A_0017	JU2464	GCAGCGGGGGGCTCACATGAGNNNNNNNNNNCTTCAGCTTCCCGATATCCGACGGTAGTGTCGCCGCCGTCGCCACAAAA	I:1598470-1598569/19,21/+	0.991192	I	1598470	1598488	1	CGCCGCCGTCGCCACAAAA	1598549	1598569	1	GCAGCGGGGGGCTCACATGAG	1598489	1598548	AAAGAGCAAATGCACATAGAGCAAAAACACGAAAAGAATGGAAAAAATGGGCGGAGCCTC	1598533	1598543	+	0	32
JU2464_II:12957380:A->C_0289	JU2464	GTGTTGTGCCAGATTTTGGCNNNNNNNNNNCTTCAGCTTCCCGATATCCGACGGTAGTGTGCACACCTGGTTGGTATGCT	II:12957311-12957410/20,20/+	0.985143	II	12957311	12957330	1	GCACACCTGGTTGGTATGCT	12957391	12957410	1	GTGTTGTGCCAGATTTTGGC	12957331	12957390	CAAGTTTCACCCAAAAAATTTGGTAAAGAAACTGGTAAAACTTGGGCAAAAGTGTGTATA	12957375	12957385	+	0	31
JU2464_IV:13198821:G->A_0670	JU2464	CATCTCTCCCCGTGCCGGAANNNNNNNNNNCTTCAGCTTCCCGATATCCGACGGTAGTGTGCCGGGAATCAATTTCGATT	IV:13198789-13198888/20,20/-	0.984385	IV	13198869	13198888	1	GCCGGGAATCAATTTCGATT	13198789	13198808	1	CATCTCTCCCCGTGCCGGAA	13198809	13198868	AATTTTAACCTATTTTTTCGCCACAAAAAATCTAATATTTGAATTAACGAATAGCATTCC	13198816	13198826	-	0	33
JU2464_X:12380030:T->C_1030	JU2464	GGGGGGGGGGGGGTACTTTNNNNNNNNNNCTTCAGCTTCCCGATATCCGACGGTAGTGTTGTGCGGAAAGTGGCTAACAG	X:12379960-12380059/21,19/+	0.992669	X	12379960	12379980	1	TGTGCGGAAAGTGGCTAACAG	12380041	12380059	3	GGGGGGGGGGGGGTACTTT	12379981	12380040	TTTTGTTTAAAAAACTCGAAAATCCGCAACGAAGTGAAAAATCAACTTATATGGGGGGGG	12380025	12380035	+	0	30
JU2519_II:4871040:T->G_0048	JU2519	ATCATTCCTTGCAATCGGCNNNNNNNNNNCTTCAGCTTCCCGATATCCGACGGTAGTGTGGGTTGGCTTGAAGGGAGACG	II:4870970-4871069/21,19/+	0.989586	II	4870970	4870990	1	GGGTTGGCTTGAAGGGAGACG	4871051	4871069	1	ATCATTCCTTGCAATCGGC	4870991	4871050	TAGAAGACCGTTGCCTGGGAAGAAAAAAGAAAACAGAAAAACGAACCGATCTGAACTGTT	4871035	4871045	+	0	30
JU2519_III:2764480:T->A_0077	JU2519	GCCCCGCCCATTTTGTGGGCGTGNNNNNNNNNNCTTCAGCTTCCCGATATCCGACGGTAGTGTTGGGGAATTTTTTTCTG	III:2764420-2764519/17,23/+	0.980986	III	2764420	2764436	1	TGGGGAATTTTTTTCTG	2764497	2764519	1	GCCCCGCCCATTTTGTGGGCGTG	2764437	2764496	CGAAATTTAATTTTTTTTCGAAATATAATGAGATATTTTGCGTTTAAAAAAATACATAAA	2764475	2764485	+	0	40
JU2519_IV:13333113:C->T_0115	JU2519	GTTTGTGTATGGGGGTATGNNNNNNNNNNCTTCAGCTTCCCGATATCCGACGGTAGTGTTTGAGCAAGTGAGGAGGGGGG	IV:13333043-13333142/21,19/+	0.990472	IV	13333043	13333063	1	TTGAGCAAGTGAGGAGGGGGG	13333124	13333142	1	GTTTGTGTATGGGGGTATG	13333064	13333123	AGGCGAACAATGTGTGTTGAGTGACTCTATTCGTTGGTTTTTCAACAGTCTAACGGGTCC	13333108	13333118	+	0	30
JU2519_V:19665014:G->A_0204	JU2519	CCGAAGGGGGCGCTGTTCCNNNNNNNNNNCTTCAGCTTCCCGATATCCGACGGTAGTGTGCCACCAAACCAAAACCCAAC	V:19664944-19665043/21,19/+	0.99024	V	19664944	19664964	1	GCCACCAAACCAAAACCCAAC	19665025	19665043	1	CCGAAGGGGGCGCTGTTCC	19664965	19665024	ATATATAAGATATTTTATAGCTTGAAGCACGACACGACCTCGTTGAAAAGCGATAAATTT	19665009	19665019	+	0	30
JU2526_II:13167927:G->T_0162	JU2526	CAATGCGATTAGGATCAATTGGCNNNNNNNNNNCTTCAGCTTCCCGATATCCGACGGTAGTGTAAAGGAGGCCCGTGTGG	II:13167861-13167960/17,23/+	0.98414	II	13167861	13167877	1	AAAGGAGGCCCGTGTGG	13167938	13167960	1	CAATGCGATTAGGATCAATTGGC	13167878	13167937	AACCGGACTAAATGAAAAGGTTTTGCCGAAAGAAGAAGAAGCAATGCCAGACTATTGCAT	13167922	13167932	+	0	34
JU2526_II:13240732:C->A_0163	JU2526	TGGCTGCCGGGCCGGATATCTNNNNNNNNNNCTTCAGCTTCCCGATATCCGACGGTAGTGTAACTTCACAGCGGCTCAGT	II:13240702-13240801/19,21/-	0.981106	II	13240783	13240801	1	AACTTCACAGCGGCTCAGT	13240702	13240722	1	TGGCTGCCGGGCCGGATATCT	13240723	13240782	TAATCACTATGGAGCAAAATATTGAGGATAAAGTCCGAAAGGGGCCGATTGCAGTGGGAA	13240727	13240737	-	0	31
JU2526_IV:11940715:G->A_0354	JU2526	GTGTCTGAATGTATAGTCGGACNNNNNNNNNNCTTCAGCTTCCCGATATCCGACGGTAGTGTGGGAAAATGCGCTCCCGA	IV:11940686-11940785/18,22/-	0.981099	IV	11940768	11940785	1	GGGAAAATGCGCTCCCGA	11940686	11940707	1	GTGTCTGAATGTATAGTCGGAC	11940708	11940767	GACGCCTCCACTAGAGAAAACGTTATTTATGATAATAAAAATAAAATCTTTTCCAGAAAA	11940710	11940720	-	0	30
JU2526_IV:4688328:T->G_0289	JU2526	ATGACTTGAAGGGGCCGGGGNNNNNNNNNNCTTCAGCTTCCCGATATCCGACGGTAGTGTGGGGTGAAAGTCAAAGTGTT	IV:4688304-4688403/20,20/-	0.974439	IV	4688384	4688403	1	GGGGTGAAAGTCAAAGTGTT	4688304	4688323	1	ATGACTTGAAGGGGCCGGGG	4688324	4688383	TCTTACCTTAAATCGTTCCCTCCATTTCTTCTGAGTATGAACACATATCATCATAAAATC	4688323	4688333	-	0	25
JU2576_I:516916:G->T_0172	JU2576	CGTGTGCCAAAGTTCTCGCNNNNNNNNNNCTTCAGCTTCCCGATATCCGACGGTAGTGTTTTGATTAGTGATTCGGGTGG	I:516846-516945/21,19/+	0.995777	I	516846	516866	1	TTTGATTAGTGATTCGGGTGG	516927	516945	1	CGTGTGCCAAAGTTCTCGC	516867	516926	GCAAAACGAGAGAGATAGAAAGAGAAAAAGCGAAGAGGACAACGAACACGTGTAATCAAC	516911	516921	+	0	30
JU2576_II:756586:T->A_0471	JU2576	TCTTACCATGGGTGGTGCTGNNNNNNNNNNCTTCAGCTTCCCGATATCCGACGGTAGTGTTTGTCAGATGGGCCGGGGCA	II:756517-756616/20,20/+	0.9951	II	756517	756536	1	TTGTCAGATGGGCCGGGGCA	756597	756616	1	TCTTACCATGGGTGGTGCTG	756537	756596	CTTCTTAGAAAACAAACTGGATATCGATTGTTTTTTTATAGCCGGAAATTAAAAAAAAAA	756581	756591	+	0	31
JU2576_IV:7907569:T->A_0781	JU2576	GGATGAAGATGTCGCGGGACNNNNNNNNNNCTTCAGCTTCCCGATATCCGACGGTAGTGTGATGACTGGTTGGATGGGTT	IV:7907500-7907599/20,20/+	0.997281	IV	7907500	7907519	1	GATGACTGGTTGGATGGGTT	7907580	7907599	1	GGATGAAGATGTCGCGGGAC	7907520	7907579	GGAGCCAACTGAAAATAAGGCAAAAAATAAGAAAGAACTAGACGATTCATAAGAGGCACT	7907564	7907574	+	0	31
JU2576_V:779685:A->C_1089	JU2576	GGGAACGAAAAGCAAAACTTCGNNNNNNNNNNCTTCAGCTTCCCGATATCCGACGGTAGTGTCATGGTTGGGTCTAGGCG	V:779618-779717/18,22/+	0.99099	V	779618	779635	1	CATGGTTGGGTCTAGGCG	779696	779717	1	GGGAACGAAAAGCAAAACTTCG	779636	779695	CTAGTTTGAAATGCAAAAAAAAATGCAAAAATATATATTTTTTTTTAAAAACATTTTTAT	779680	779690	+	0	33
JU258_I:3628582:A->G_0312	JU258	TGACACCAAGACAGTGCACCNNNNNNNNNNCTTCAGCTTCCCGATATCCGACGGTAGTGTGCATATACCCACTTTTGCCA	I:3628513-3628612/20,20/+	0.98529	I	3628513	3628532	1	GCATATACCCACTTTTGCCA	3628593	3628612	1	TGACACCAAGACAGTGCACC	3628533	3628592	AAAACAAACTTAATCGTAAGATATGGTGCATCAAAAAAGTGAGCTCATAAAAAAGTTTGC	3628577	3628587	+	0	31
JU258_IV:652672:G->A_1698	JU258	GCGGTATCATCCGGCGGCNNNNNNNNNNCTTCAGCTTCCCGATATCCGACGGTAGTGTGGGGCCGCAAACACGAAACTTC	IV:652601-652700/22,18/+	0.994979	IV	652601	652622	1	GGGGCCGCAAACACGAAACTTC	652683	652700	1	GCGGTATCATCCGGCGGC	652623	652682	CAAATTTTTGAACTATTTTCGCCAATTTTAGCGAAAATTTGCGATTTTTGCTCCAAAAAT	652667	652677	+	0	29
JU258_V:17066639:C->G_2584	JU258	GCTCATTTGTGATGTGTTTTCCNNNNNNNNNNCTTCAGCTTCCCGATATCCGACGGTAGTGTCCTGTCGGAGGAGTTCGC	V:17066605-17066704/18,22/-	0.984293	V	17066687	17066704	1	CCTGTCGGAGGAGTTCGC	17066605	17066626	1	GCTCATTTGTGATGTGTTTTCC	17066627	17066686	AAAACAGATTGTGACGTAAGAAACAATAAAACATTTAAATATTCATTGACAAACGATTTT	17066634	17066644	-	0	35
JU258_X:4359787:C->T_3220	JU258	CAAGAGACAACGGTAGTGGTCTCNNNNNNNNNNCTTCAGCTTCCCGATATCCGACGGTAGTGTTAGGATGTTTGGTTACTG	X:4359722-4359821/18,23/+	0.980624	X	4359722	4359739	1	TAGGATGTTTGGTTACTG	4359799	4359821	1	CAAGAGACAACGGTAGTGGTCTC	4359740	4359798	AGAAACTGACGACGAATTTGCAAAAATTGCTTGATTATTGAGACCTACGGAACAAAATA	4359782	4359792	+	0	35
JU2592_III:8886711:T->A_0192	JU2592	AAGGAGCTCCGGTTTCAGAATGNNNNNNNNNNCTTCAGCTTCCCGATATCCGACGGTAGTGTGGCGGTTTAAACAAACAA	III:8886644-8886743/18,22/+	0.980323	III	8886644	8886661	1	GGCGGTTTAAACAAACAA	8886722	8886743	1	AAGGAGCTCCGGTTTCAGAATG	8886662	8886721	AGAAAAACACAAGGAATATCGGATCGAAAGGATGCTCCGAGGAGCAATATTCGGGAAAAA	8886706	8886716	+	0	33
JU2592_IV:729788:G->A_0217	JU2592	CACACCCAAGTGCTCCCATAGNNNNNNNNNNCTTCAGCTTCCCGATATCCGACGGTAGTGTAGAACACAAGTAGCACAGG	IV:729720-729819/19,21/+	0.982523	IV	729720	729738	1	AGAACACAAGTAGCACAGG	729799	729819	1	CACACCCAAGTGCTCCCATAG	729739	729798	ATCCCATCCAACATCCTGAAATTTTGAATTAAAAACACCAAAAACAGTAGAATTACCGAC	729778	729793	+	0	32
JU2592_V:4412571:A->T_0335	JU2592	AATTTGGTTCGCTTGATTTTTATCNNNNNNNNNNCTTCAGCTTCCCGATATCCGACGGTAGTGTTGGGCTGGGGCGGGAT	V:4412540-4412639/16,24/-	0.98414	V	4412624	4412639	1	TGGGCTGGGGCGGGAT	4412540	4412563	1	AATTTGGTTCGCTTGATTTTTATC	4412564	4412623	AAAGAGGGAAAAAAATCTCAGAAAATTCAAGATTTCAGAAAAAAATACAATTTTTTTTTA	4412566	4412576	-	0	32
JU2592_V:6989882:C->T_0522	JU2592	GCGGAGATTGGTGCGTCTTTTTGGNNNNNNNNNNCTTCAGCTTCCCGATATCCGACGGTAGTGTAAGTGCAGCTTGTTAA	V:6989817-6989916/16,24/+	0.983972	V	6989817	6989832	1	AAGTGCAGCTTGTTAA	6989893	6989916	1	GCGGAGATTGGTGCGTCTTTTTGG	6989833	6989892	AATTTCTCGCATGAAATGAAATAGTGGATAATATTAATGAGAGGTGAAACATCGCAAGCG	6989871	6989887	+	0	35
JU2593_II:12072122:G->A_0087	JU2593	AGAAAAACGGGAACAAAGTGTGTGNNNNNNNNNNCTTCAGCTTCCCGATATCCGACGGTAGTGTCTGGAGATTGTTAGCG	II:12072057-12072156/16,24/+	0.985513	II	12072057	12072072	1	CTGGAGATTGTTAGCG	12072133	12072156	1	AGAAAAACGGGAACAAAGTGTGTG	12072073	12072132	ACCAAAAACTTCATATGTTGTTCAGAAAATAAGATAGAAAAGAAAATAGGAAAGTGAAAG	12072117	12072127	+	0	35
JU2593_IV:8394352:T->A_0197	JU2593	TACACTCCGATGGACTGGANNNNNNNNNNCTTCAGCTTCCCGATATCCGACGGTAGTGTAAAGCGTTTCCGTGAGGAGCA	IV:8394286-8394385/21,19/+	0.990455	IV	8394286	8394306	1	AAAGCGTTTCCGTGAGGAGCA	8394367	8394385	1	TACACTCCGATGGACTGGA	8394307	8394366	AATATAAAAAGAGAAGGAGAAATGGAGCGGAAAATGAGAAGCAAATTTTTGATGAGAAAA	8394306	8394357	+	0	34
JU2593_V:10908195:A->T_0284	JU2593	GTACAGGTTTGGTGAACGTCNNNNNNNNNNCTTCAGCTTCCCGATATCCGACGGTAGTGTAAGTTCACAAGAATCCGAAC	V:10908126-10908225/20,20/+	0.981366	V	10908126	10908145	1	AAGTTCACAAGAATCCGAAC	10908206	10908225	1	GTACAGGTTTGGTGAACGTC	10908146	10908205	TGACATCACGGCTATATAAGCAAATGCGATAAAGACGTCAAAAAGGGAAAGTAGCAAAAG	10908190	10908200	+	0	31
JU2593_X:9373342:G->A_0374	JU2593	ATAAAAAGTTTGCGGTCGATGATGNNNNNNNNNNCTTCAGCTTCCCGATATCCGACGGTAGTGTGTTGGCCGCAACAAGA	X:9373277-9373376/16,24/+	0.982886	X	9373277	9373292	1	GTTGGCCGCAACAAGA	9373353	9373376	1	ATAAAAAGTTTGCGGTCGATGATG	9373293	9373352	AAGAAACAAAAAAGAACGAAACTGCGAGATATAAAAAAGTAACTCACAAGGGGATTGCCT	9373337	9373347	+	0	35
JU2619_I:3268769:G->T_0027	JU2619	CTGATTCTGATGAAGAATAGNNNNNNNNNNCTTCAGCTTCCCGATATCCGACGGTAGTGTCGAAGAGGTTAAGGAGGAAG	I:3268700-3268799/20,20/+	0.984904	I	3268700	3268719	1	CGAAGAGGTTAAGGAGGAAG	3268780	3268799	1	CTGATTCTGATGAAGAATAG	3268720	3268779	ATGAAGCAGAGCCAGAGAAGAAAAAGAAGAAGAAGGAAAAGAAAGCAAAGAAGGCCGATA	3268764	3268774	+	0	31
JU2619_II:4992898:G->A_1067	JU2619	GTAGCGAGTGGCGCCACTCNNNNNNNNNNCTTCAGCTTCCCGATATCCGACGGTAGTGTAAATAAGGGGTTGAGAACTCA	II:4992828-4992927/21,19/+	0.991465	II	4992828	4992848	1	AAATAAGGGGTTGAGAACTCA	4992909	4992927	1	GTAGCGAGTGGCGCCACTC	4992849	4992908	AAGAGAGAATATCTAGAAATTTAATAATAACAGCAATCAAAGCAGGGTGGAAGAATGAAC	4992893	4992903	+	0	30
JU2619_III:1530223:G->A_1147	JU2619	CACCGGGGTGAAAATTTGCNNNNNNNNNNCTTCAGCTTCCCGATATCCGACGGTAGTGTTTCGAGGGGGGTACGGTAGCT	III:1530153-1530252/21,19/+	0.988127	III	1530153	1530173	2	TTCGAGGGGGGTACGGTAGCT	1530234	1530252	1	CACCGGGGTGAAAATTTGC	1530174	1530233	TCGAAAGTACGCAAACACCGAATTTTGCGAAATTTCGCACAATTTGGCTGAAAAAACAGT	1530218	1530228	+	0	30
JU2619_V:11674237:C->T_1448	JU2619	GGAATGGAGGGACGGAAAAGGTGNNNNNNNNNNCTTCAGCTTCCCGATATCCGACGGTAGTGTAGAAAGAAGGAAGCTGG	V:11674210-11674309/17,23/-	0.982408	V	11674293	11674309	1	AGAAAGAAGGAAGCTGG	11674210	11674232	1	GGAATGGAGGGACGGAAAAGGTG	11674233	11674292	CTGAACCAATTTCTCATACGGACCGTTCGACCGTTCGGGCGTGTCAACGATGTGAGTACA	11674232	11674242	-	0	28
JU2811_II:736431:C->A_0044	JU2811	CTCAACTCGATGATCTCCTGNNNNNNNNNNCTTCAGCTTCCCGATATCCGACGGTAGTGTTGCTATCATCGGTTCCGTGG	II:736399-736498/20,20/-	0.988603	II	736479	736498	1	TGCTATCATCGGTTCCGTGG	736399	736418	1	CTCAACTCGATGATCTCCTG	736419	736478	AAATATTGAAGATTCGTCTACCATCAAGAACAAGAAGAGCAGCATCCGGATTAACCAAAG	736426	736436	-	0	33
JU2811_IV:16491929:G->A_1099	JU2811	AGGCGTCTCTGTGCTCTTTCNNNNNNNNNNCTTCAGCTTCCCGATATCCGACGGTAGTGTGGAAACGACAACAACGACGA	IV:16491860-16491959/20,20/+	0.992011	IV	16491860	16491879	1	GGAAACGACAACAACGACGA	16491940	16491959	1	AGGCGTCTCTGTGCTCTTTC	16491880	16491939	CGACGACTACGACGAAGACGACACCAAAATGTGGTCTCGAGAAGAAGAAGAAGAAGAAGA	16491924	16491934	+	0	31
JU2811_V:16588101:A->G_2625	JU2811	CGAATGGGGACCAAAGAGAGGGNNNNNNNNNNCTTCAGCTTCCCGATATCCGACGGTAGTGTCGCGGAGATGGTTGAAGG	V:16588034-16588133/18,22/+	0.985081	V	16588034	16588051	1	CGCGGAGATGGTTGAAGG	16588112	16588133	1	CGAATGGGGACCAAAGAGAGGG	16588052	16588111	GTGTACCCAGGGTGGAGCCTAATTATAAGGGGGACAGGAAAAAGGGATCAATGAAGGTAG	16588083	16588106	+	0	33
JU2811_X:10960240:T->A_2748	JU2811	GCCACTTGGCTTGTGCTGGACTNNNNNNNNNNCTTCAGCTTCCCGATATCCGACGGTAGTGTATTCAAGGGAAGAACCAG	X:10960173-10960272/18,22/+	0.98175	X	10960173	10960190	1	ATTCAAGGGAAGAACCAG	10960251	10960272	1	GCCACTTGGCTTGTGCTGGACT	10960191	10960250	AACTGATACTCCTCCTTCAATGATGCTCATGAAAACTATAACTTTCAAATTTATAGCTTG	10960235	10960245	+	0	33
JU2829_I:2816753:G->A_0006	JU2829	AAGTGGAAACTGTTGAGCCAAAGNNNNNNNNNNCTTCAGCTTCCCGATATCCGACGGTAGTGTGAAGGATAGTGAAGAGA	I:2816687-2816786/17,23/+	0.984488	I	2816687	2816703	1	GAAGGATAGTGAAGAGA	2816764	2816786	1	AAGTGGAAACTGTTGAGCCAAAG	2816704	2816763	TGGGAGAAGTTGAAGAGAAGAAAAACAAGAAAAAGGAAGAGAATAAGAAGGCTGTTGAGA	2816748	2816758	+	0	34
JU2829_II:11708519:A->G_0086	JU2829	GTGTGGTTGGGGAGCTGCTNNNNNNNNNNCTTCAGCTTCCCGATATCCGACGGTAGTGTCGAGAAGGCTCAATACAAGAA	II:11708488-11708587/21,19/-	0.982213	II	11708567	11708587	1	CGAGAAGGCTCAATACAAGAA	11708488	11708506	1	GTGTGGTTGGGGAGCTGCT	11708507	11708566	AATTGATCGTCTCATCGATCAACTCGAGTTGAAGGCCGACGATCACGTCCTGGAAATCGG	11708514	11708524	-	0	32
JU2829_III:7880361:T->C_0132	JU2829	GTTTTTTCTCGATCACCTCNNNNNNNNNNCTTCAGCTTCCCGATATCCGACGGTAGTGTTGCGAAATCCGGTCAGATGTC	III:7880291-7880390/21,19/+	0.984335	III	7880291	7880311	1	TGCGAAATCCGGTCAGATGTC	7880372	7880390	1	GTTTTTTCTCGATCACCTC	7880312	7880371	AGATAAAAAGCAGATCAACCCAAAAAAAAGGTTTGAAATCGAAACCAATTCAAAAACGAT	7880356	7880366	+	0	30
JU2829_IV:10574711:C->T_0188	JU2829	GCCTATGTGTGTGTGTGTGTGGNNNNNNNNNNCTTCAGCTTCCCGATATCCGACGGTAGTGTCGGATGGAGCACATAGGG	IV:10574678-10574777/18,22/-	0.984795	IV	10574760	10574777	1	CGGATGGAGCACATAGGG	10574678	10574699	1	GCCTATGTGTGTGTGTGTGTGG	10574700	10574759	AAGATGTGTATGTATATAAAAAATGTGTAATGGAAACTTTGGGGAGCAGGGAGACGGGGG	10574706	10574716	-	0	34
JU2838_I:6421:A->T_0001	JU2838	ACGACAATTTGCCGGTTCGNNNNNNNNNNCTTCAGCTTCCCGATATCCGACGGTAGTGTAAGTTGGCCCAGGGGTGACCG	I:6351-6450/21,19/+	0.985711	I	6351	6371	1	AAGTTGGCCCAGGGGTGACCG	6432	6450	1	ACGACAATTTGCCGGTTCG	6372	6431	GCAATTTCAAGCAAATCGGCAAATTGTCAATTTTCTGAATTTGCCGAAAATTTGACAAAA	6415	6426	+	0	30
JU2838_III:12688816:G->A_0999	JU2838	TAAGACAGTCTGAGCCCACNNNNNNNNNNCTTCAGCTTCCCGATATCCGACGGTAGTGTGCATCGTCTTTTTGTGGGGAA	III:12688746-12688845/21,19/+	0.994029	III	12688746	12688766	1	GCATCGTCTTTTTGTGGGGAA	12688827	12688845	1	TAAGACAGTCTGAGCCCAC	12688767	12688826	GGGGTAAGGGAAAAGGGAAAAAAACGATAATAGAAAGGAAATAATGTTGGAATAAATTAC	12688810	12688821	+	0	30
JU2838_IV:16927896:A->T_1391	JU2838	AACAGCCCCGGTCCCGATGNNNNNNNNNNCTTCAGCTTCCCGATATCCGACGGTAGTGTAACGGAAATTTTTCTTGAAAT	IV:16927826-16927925/21,19/+	0.993111	IV	16927826	16927846	2	AACGGAAATTTTTCTTGAAAT	16927907	16927925	1	AACAGCCCCGGTCCCGATG	16927847	16927906	ATTTGTTCCCAAAAACCAAAAAAAAAAAACAAAAAAAAAACAAAAACCAAAAAAAAAATC	16927891	16927901	+	0	30
JU2838_V:8999057:A->C_1466	JU2838	GCCCCGGTCAAGATTCAGNNNNNNNNNNCTTCAGCTTCCCGATATCCGACGGTAGTGTGAGGGGGTCCGTAGATTTGGGG	V:8998986-8999085/22,18/+	0.986406	V	8998986	8999007	40	GAGGGGGTCCGTAGATTTGGGG	8999068	8999085	1	GCCCCGGTCAAGATTCAG	8999008	8999067	TTCTCATATTGAAATTCCGATAGAAGAGTGTTAGTTATGATCTCTCCAAAAAATTTAGCT	8999039	8999062	+	0	29
JU2841_II:13971639:C->T_0963	JU2841	CGGTGTGCCGATTGGCCGNNNNNNNNNNCTTCAGCTTCCCGATATCCGACGGTAGTGTGCCGGTTTTGCCGATTTGCCGG	II:13971568-13971667/22,18/+	0.998464	II	13971568	13971589	11	GCCGGTTTTGCCGATTTGCCGG	13971650	13971667	1	CGGTGTGCCGATTGGCCG	13971590	13971649	AAATTTTTATTTTCGCTAAATTGACGGTTTTGCCGGAAATTTAAAATTTCGGCATATTGC	13971634	13971644	+	0	29
JU2841_III:11161992:T->C_1488	JU2841	ACAAATTTCTGCGCCTTTANNNNNNNNNNCTTCAGCTTCCCGATATCCGACGGTAGTGTGCGCGTGCGAACGGCTGGTTA	III:11161922-11162021/21,19/+	0.999539	III	11161922	11161942	9	GCGCGTGCGAACGGCTGGTTA	11162003	11162021	1	ACAAATTTCTGCGCCTTTA	11161943	11162002	AAAAAAAAAAAATTAAAAAAAAAAAACAAAAAAAAAAAATTTAAAAATTTAAAAAAATCC	11161987	11161997	+	0	30
JU2841_V:8629430:G->A_2371	JU2841	GTGAATAACGTATGCACACNNNNNNNNNNCTTCAGCTTCCCGATATCCGACGGTAGTGTGGGGGGTTTTAGAGGTGTGAG	V:8629360-8629459/21,19/+	0.993041	V	8629360	8629380	1	GGGGGGTTTTAGAGGTGTGAG	8629441	8629459	1	GTGAATAACGTATGCACAC	8629381	8629440	GCGAGTTTACAAAACAAGAAAAGTATTCAGGAAAAATGTGATAAAAATTGTTTAAATAAC	8629425	8629435	+	0	30
JU2841_X:15842559:A->G_2642	JU2841	AACTAGACAAAGACAGCTGCTTGGNNNNNNNNNNCTTCAGCTTCCCGATATCCGACGGTAGTGTGTGTGCGGAAAGAACG	X:15842494-15842593/16,24/+	0.985185	X	15842494	15842509	1	GTGTGCGGAAAGAACG	15842570	15842593	1	AACTAGACAAAGACAGCTGCTTGG	15842510	15842569	GCAATGGTTGAAGCTGAGAATAGAAGGACTTGGAGGAAATAGAGGAAAGATAATAATAAA	15842554	15842564	+	0	35
JU2878_I:11925872:C->T_0511	JU2878	GGGGTTTTAAGCTTGGAAATTGNNNNNNNNNNCTTCAGCTTCCCGATATCCGACGGTAGTGTAGAAAGAAGCGGAAAGTG	I:11925805-11925904/18,22/+	0.988638	I	11925805	11925822	1	AGAAAGAAGCGGAAAGTG	11925883	11925904	1	GGGGTTTTAAGCTTGGAAATTG	11925823	11925882	GACAACAATGAGGGAAACACAAAAATGGACAAAAATTGCAAATTTTTAACTGAAAAATTC	11925867	11925877	+	0	33
JU2878_II:2250295:C->T_0729	JU2878	TCGGATTCCCCGCAAAATTNNNNNNNNNNCTTCAGCTTCCCGATATCCGACGGTAGTGTTCTGGCTCCCTGGCCCGTTTG	II:2250225-2250324/21,19/+	0.983439	II	2250225	2250245	1	TCTGGCTCCCTGGCCCGTTTG	2250306	2250324	1	TCGGATTCCCCGCAAAATT	2250246	2250305	ATCAGAAATGGGATCATCTGGAACATAACAATTGAAAATTTCGGATTTTCAATGCCAAAT	2250269	2250300	+	0	30
JU2878_III:12666999:A->G_1095	JU2878	CGGCAAATTCGGCAAGTCGGCGNNNNNNNNNNCTTCAGCTTCCCGATATCCGACGGTAGTGTTTGGCGGTTTGCCGATTT	III:12666932-12667031/18,22/+	0.991699	III	12666932	12666949	18	TTGGCGGTTTGCCGATTT	12667010	12667031	1	CGGCAAATTCGGCAAGTCGGCG	12666950	12667009	GCCGGAAACTTTTAATTTCGGTAAATTGACGGTTTTCCATATTGCCGGAATTTTTAATTC	12666994	12667004	+	0	33
JU2878_V:175914:C->A_1628	JU2878	ATCGACACAAGCGCTACAGTAGCANNNNNNNNNNCTTCAGCTTCCCGATATCCGACGGTAGTGTTATGCAGGCGCGGAGG	V:175849-175948/16,24/+	0.995212	V	175849	175864	1	TATGCAGGCGCGGAGG	175925	175948	2	ATCGACACAAGCGCTACAGTAGCA	175865	175924	AAAATAAAATATCGATATCACTATTCGGAAACAAATTCATTTCAAAAATCGAGCACGTAA	175909	175919	+	0	35
JU2879_I:7951960:G->A_0080	JU2879	GAGACATTGAAAAAAGCCCCGCNNNNNNNNNNCTTCAGCTTCCCGATATCCGACGGTAGTGTGTCGCTTGACTGCTCCCT	I:7951893-7951992/18,22/+	0.984847	I	7951893	7951910	1	GTCGCTTGACTGCTCCCT	7951971	7951992	1	GAGACATTGAAAAAAGCCCCGC	7951911	7951970	CTCTTCTTCTTTTTTTGCTATCGAAGAAAAAGAAGAAGAAGCAGAAGAAGAAAAAAGAAG	7951955	7951965	+	0	33
JU2879_II:6620354:G->A_0258	JU2879	ATGCGTGCGTCAAACATTCNNNNNNNNNNCTTCAGCTTCCCGATATCCGACGGTAGTGTGTTGCCCACCGGACGAGATAT	II:6620284-6620383/21,19/+	0.987732	II	6620284	6620304	1	GTTGCCCACCGGACGAGATAT	6620365	6620383	1	ATGCGTGCGTCAAACATTC	6620305	6620364	CCGTTTTGATAAAATGCGCGAAACAATACAAAAAACCGGGAAACAAAAAGGCTAAGGGAT	6620349	6620359	+	0	30
JU2879_III:12810613:G->T_0511	JU2879	GATTCCCTGACTCTGATGCCNNNNNNNNNNCTTCAGCTTCCCGATATCCGACGGTAGTGTGAATCGTCTTGTCGCTTGCC	III:12810544-12810643/20,20/+	0.983403	III	12810544	12810563	1	GAATCGTCTTGTCGCTTGCC	12810624	12810643	1	GATTCCCTGACTCTGATGCC	12810564	12810623	GATTCGTCGCAATCAAATTTAGCAGTAATTGATAAATATATAAATTCAAGAATTTCATGT	12810608	12810618	+	0	31
JU2879_V:3349200:G->A_0703	JU2879	CGGAGACATGTGGGGAAGACGNNNNNNNNNNCTTCAGCTTCCCGATATCCGACGGTAGTGTGAGAAGAAGAAGAAAGAAA	V:3349132-3349231/19,21/+	0.991366	V	3349132	3349150	3	GAGAAGAAGAAGAAAGAAA	3349211	3349231	2	CGGAGACATGTGGGGAAGACG	3349151	3349210	TGCTTCAAGAGAACTGCAAAGATTACTTCGGAAAGGACAACTGTATGAAGAAGGAGATCA	3349180	3349205	+	0	32
JU3137_I:926958:G->A_0007	JU3137	CACCTGCCGGGTTCCCGCANNNNNNNNNNCTTCAGCTTCCCGATATCCGACGGTAGTGTCTAGGTGGCTCTCAAGTACTG	I:926888-926987/21,19/+	0.991223	I	926888	926908	1	CTAGGTGGCTCTCAAGTACTG	926969	926987	1	CACCTGCCGGGTTCCCGCA	926909	926968	CTGGACCTGAAAAACTGCAAATTTAATTTGAAATTTGGGATGCAAAAAAGTAGCAGCCGA	926953	926963	+	0	30
JU3137_II:4312381:T->C_0164	JU3137	CTGAGCCTAGGCCTGAGCCNNNNNNNNNNCTTCAGCTTCCCGATATCCGACGGTAGTGTGCCGAGAAAGAGGAAGCTGTA	II:4312311-4312410/21,19/+	0.984392	II	4312311	4312331	1	GCCGAGAAAGAGGAAGCTGTA	4312392	4312410	1	CTGAGCCTAGGCCTGAGCC	4312332	4312391	GTAGGACCAAGATTAAGCCTAAGGTTAAGCCTAAGCCTAAGCCTTAGCCTAAGCCTAAGC	4312376	4312386	+	0	30
JU3137_IV:11788808:A->C_0676	JU3137	GCGATAATTCAATTCTCAGTGCNNNNNNNNNNCTTCAGCTTCCCGATATCCGACGGTAGTGTTTCCAACATTGAATCAAA	IV:11788741-11788840/18,22/+	0.987976	IV	11788741	11788758	1	TTCCAACATTGAATCAAA	11788819	11788840	1	GCGATAATTCAATTCTCAGTGC	11788759	11788818	AAAGGAAAAAAGAAAGAAAAAAGAAGACGGCGAAGAAGAAAAAAGAAAAAAGAAGAGGAT	11788803	11788813	+	0	33
JU3137_V:7226702:G->A_0831	JU3137	GTTGAGGTGGCATAGGACGNNNNNNNNNNCTTCAGCTTCCCGATATCCGACGGTAGTGTGTGGAGGTTGCGGCGGGGAAA	V:7226632-7226731/21,19/+	0.988283	V	7226632	7226652	1	GTGGAGGTTGCGGCGGGGAAA	7226713	7226731	1	GTTGAGGTGGCATAGGACG	7226653	7226712	AATCACGTGGTTGTGGTGGATAGAAGCCGTTTCCAGGAGCATTATTAAAGAACGGAGATT	7226697	7226707	+	0	30
JU561_I:8259121:C->T_0045	JU561	GTGGTCGGGCTTAATGAAAATTGNNNNNNNNNNCTTCAGCTTCCCGATATCCGACGGTAGTGTAAAGGAAATGAGGGAAG	I:8259094-8259193/17,23/-	0.983505	I	8259177	8259193	1	AAAGGAAATGAGGGAAG	8259094	8259116	1	GTGGTCGGGCTTAATGAAAATTG	8259117	8259176	AGAATCTTGATGAGATCACGAATGACCTCATTTTTAATTTCAGATTCAATGAAAAGCCAC	8259116	8259126	-	0	28
JU561_III:7999832:G->A_0248	JU561	CACAGCACAAACTCCAGACGNNNNNNNNNNCTTCAGCTTCCCGATATCCGACGGTAGTGTTAGTTCTTGTGAATTGTTGC	III:7999763-7999862/20,20/+	0.982706	III	7999763	7999782	1	TAGTTCTTGTGAATTGTTGC	7999843	7999862	1	CACAGCACAAACTCCAGACG	7999783	7999842	CCAAAAAAAAAGAAGCTGATCTACATTCATTTAAAAATAAATATAGGTAGATTGTCGAGA	7999827	7999837	+	0	31
JU561_IV:7559511:G->A_0348	JU561	GGATGAGATAATTGACAATCGATTGNNNNNNNNNNCTTCAGCTTCCCGATATCCGACGGTAGTGTAAAAAGATGGTGGATG	IV:7559446-7559545/16,25/+	0.981235	IV	7559446	7559461	1	AAAAAGATGGTGGATG	7559521	7559545	1	GGATGAGATAATTGACAATCGATTG	7559462	7559520	AAAAAGTGAAATGTTAATCAAATCACTGATGGTACAGAAACAACGAAGAGATAAAGAAA	7559506	7559516	+	0	35
JU561_X:17631003:C->T_0627	JU561	TTCCTCCTGTCGCCGCCGTCNNNNNNNNNNCTTCAGCTTCCCGATATCCGACGGTAGTGTCCTTACACCCCAGAAAACGG	X:17630934-17631033/20,20/+	0.995205	X	17630934	17630953	1	CCTTACACCCCAGAAAACGG	17631014	17631033	1	TTCCTCCTGTCGCCGCCGTC	17630954	17631013	CCAGGTAACCAAAAAGCGCAACAATGGCTGATAAAAATTATCAATCATACGGTTTCGGTT	17630998	17631008	+	0	31
JU774_II:2390215:T->A_0137	JU774	CGCGTTTTTGGACTCGACGNNNNNNNNNNCTTCAGCTTCCCGATATCCGACGGTAGTGTGTACCCAGAAAAAAACCCCCA	II:2390145-2390244/21,19/+	0.99123	II	2390145	2390165	1	GTACCCAGAAAAAAACCCCCA	2390226	2390244	1	CGCGTTTTTGGACTCGACG	2390166	2390225	CTAAAACATTAAGAAACTTTAAATCACGACCCAAAAACTCTAAAAAAAATAGTCTAAAAT	2390201	2390220	+	0	30
JU774_III:6970441:G->T_0272	JU774	CTTAAGCTCGTTGAACTTGCAGGCNNNNNNNNNNCTTCAGCTTCCCGATATCCGACGGTAGTGTCTTACCGGTACGACGG	III:6970376-6970475/16,24/+	0.983547	III	6970376	6970391	1	CTTACCGGTACGACGG	6970452	6970475	2	CTTAAGCTCGTTGAACTTGCAGGC	6970392	6970451	TCAACCTGAAAAACAAATTGGTACATAAACGAAACAATAAGACAAATAAGTTACCTTCTC	6970436	6970446	+	0	35
JU774_IV:7090536:C->T_0393	JU774	CGAGCGTCAGCGGTAAGGAGGCGNNNNNNNNNNCTTCAGCTTCCCGATATCCGACGGTAGTGTTGAAATGAAGCGTGGAT	IV:7090470-7090569/17,23/+	0.983357	IV	7090470	7090486	1	TGAAATGAAGCGTGGAT	7090547	7090569	1	CGAGCGTCAGCGGTAAGGAGGCG	7090487	7090546	ATTTGATAAAAAAGAGAAGAAATGTACCTGTCTTGTGGGTTCAAACGATCAGCTAATTTG	7090531	7090541	+	0	34
JU774_V:12647774:C->T_0618	JU774	AAGGGGACGACCGCTCAGANNNNNNNNNNCTTCAGCTTCCCGATATCCGACGGTAGTGTTCCCAATGCCCGTGATTGCCG	V:12647704-12647803/21,19/+	0.99371	V	12647704	12647724	1	TCCCAATGCCCGTGATTGCCG	12647785	12647803	1	AAGGGGACGACCGCTCAGA	12647725	12647784	ATGCAATCAATACTTCGGAGAGAAAACAACTAAATATCAATTAATAAAACGGAAAAGGTA	12647769	12647779	+	0	30
JU775_II:12829294:T->C_0060	JU775	GCAGAGGTGGGCGAGATGGNNNNNNNNNNCTTCAGCTTCCCGATATCCGACGGTAGTGTCACTGGTGATGATGAGAGATG	II:12829261-12829360/21,19/-	0.983301	II	12829340	12829360	1	CACTGGTGATGATGAGAGATG	12829261	12829279	1	GCAGAGGTGGGCGAGATGG	12829280	12829339	TTTCAAAAAGCTTAAACTTGATCGTTCAACAGATGGCCTTGGTGGAGCTGGCGGTTTCAG	12829289	12829299	-	0	34
JU775_III:6003176:G->T_0093	JU775	GCAATGTATCGACATTCTGGAGGNNNNNNNNNNCTTCAGCTTCCCGATATCCGACGGTAGTGTAAGCAAAAGGAAAACCAAA	III:6003108-6003207/19,23/+	0.985663	III	6003108	6003126	1	AAGCAAAAGGAAAACCAAA	6003185	6003207	1	GCAATGTATCGACATTCTGGAGG	6003127	6003184	CAAATATAAGATTAACATTTACAGCACAACTAGATGATATTGGATTCGAGTTTGTGCA	6003171	6003181	+	0	32
JU775_IV:11996296:A->T_0168	JU775	CTCTACAGTACTCGACTCANNNNNNNNNNCTTCAGCTTCCCGATATCCGACGGTAGTGTGTTTTGCGAAGTTTTGTCTTT	IV:11996226-11996325/21,19/+	0.987807	IV	11996226	11996246	1	GTTTTGCGAAGTTTTGTCTTT	11996307	11996325	1	CTCTACAGTACTCGACTCA	11996247	11996306	TCCTGAAATGGGACATCGGACATGGGAAAAAGGAAAGAAAAAAAAACAAAAAGTTCACAC	11996291	11996301	+	0	30
JU775_X:14768501:G->A_0257	JU775	GTTTATGTTAATTTCTCCGGCACTGAGNNNNNNNNNNCTTCAGCTTCCCGATATCCGACGGTAGTGTGAACATGGGCAAACAC	X:14768436-14768535/16,27/+	0.983618	X	14768436	14768451	1	GAACATGGGCAAACAC	14768509	14768535	1	GTTTATGTTAATTTCTCCGGCACTGAG	14768452	14768508	TGACAAAGAAATAAATAAAATTCTCGCTCCAACTATGAAAATCAGCCTTGCCTTAAA	14768496	14768506	+	0	35
JU782_II:9260290:G->A_0071	JU782	TATTACCCCTTTAGCCCCCNNNNNNNNNNCTTCAGCTTCCCGATATCCGACGGTAGTGTTACGGTGAGCGTCGATCATTC	II:9260220-9260319/21,19/+	0.985088	II	9260220	9260240	1	TACGGTGAGCGTCGATCATTC	9260301	9260319	1	TATTACCCCTTTAGCCCCC	9260241	9260300	GGATGAAAAGGCAGAGAAGAGACATCAGAGAGAAAGGGAATGTGACCGCGAAAATGAGTT	9260285	9260295	+	0	30
JU782_III:10628882:G->A_0153	JU782	TTTGGACAGAGAGGAGAGACGAACNNNNNNNNNNCTTCAGCTTCCCGATATCCGACGGTAGTGTATGGCCGCGAAAAGAG	III:10628817-10628916/16,24/+	0.983787	III	10628817	10628832	1	ATGGCCGCGAAAAGAG	10628893	10628916	1	TTTGGACAGAGAGGAGAGACGAAC	10628833	10628892	AAAACTCGGCCACTGATATTTTTGGCGTCAAATAAGTAAGGTAAATGAGGTAAATGCAAA	10628876	10628887	+	0	35
JU782_III:8881243:C->T_0148	JU782	ACTGGGAACGACGAAAAACNNNNNNNNNNCTTCAGCTTCCCGATATCCGACGGTAGTGTTGAGCCTCCCGAGCACAAAAT	III:8881173-8881272/21,19/+	0.992214	III	8881173	8881193	1	TGAGCCTCCCGAGCACAAAAT	8881254	8881272	1	ACTGGGAACGACGAAAAAC	8881194	8881253	AGGAAAAAGAGAGAGGAGAAAGCGAAGAAGAAAATGAAACCACCGAACACAGAAGAGATA	8881238	8881248	+	0	30
JU782_V:781340:G->A_0221	JU782	CGGAGAAACAGCAATTGCCNNNNNNNNNNCTTCAGCTTCCCGATATCCGACGGTAGTGTATAGGGGTGGGAGGCAAACGA	V:781306-781405/21,19/-	0.988971	V	781385	781405	1	ATAGGGGTGGGAGGCAAACGA	781306	781324	1	CGGAGAAACAGCAATTGCC	781325	781384	TTATTATCGGCAAATCGGCGAATTGCCGGAATTGAAATTTCCGGCAAACCGGCAAATCGC	781335	781345	-	0	35
KR314_I:13876048:A->G_0207	KR314	GGAGAAGTTACTGCAGAAGNNNNNNNNNNCTTCAGCTTCCCGATATCCGACGGTAGTGTGAGGAAAAAGAGCGAGAAGAT	I:13875978-13876077/21,19/+	0.988647	I	13875978	13875998	1	GAGGAAAAAGAGCGAGAAGAT	13876059	13876077	1	GGAGAAGTTACTGCAGAAG	13875999	13876058	CTGAAACGAATGATTCATGGAACAACGAATCAAGTGGAGAAAGGAGAGAAAAAAGAAGAA	13876043	13876053	+	0	30
KR314_II:9695138:G->A_0499	KR314	AAGAGTGGTGGCTGGTACCNNNNNNNNNNCTTCAGCTTCCCGATATCCGACGGTAGTGTCGAGATTTGTTGACGTTGGTC	II:9695068-9695167/21,19/+	0.991566	II	9695068	9695088	1	CGAGATTTGTTGACGTTGGTC	9695149	9695167	1	AAGAGTGGTGGCTGGTACC	9695089	9695148	ATTTGATACTCCATAAAAACAAAAAATGAGCTTTTTAGACAAAGAAAAAGCAGAAAATGG	9695133	9695143	+	0	30
KR314_IV:1816421:A->G_0840	KR314	CCGGGCGTAAGGAGAGTGGNNNNNNNNNNCTTCAGCTTCCCGATATCCGACGGTAGTGTTTCTGCGTCGAAAAAAGGGGA	IV:1816351-1816450/21,19/+	0.99212	IV	1816351	1816371	1	TTCTGCGTCGAAAAAAGGGGA	1816432	1816450	1	CCGGGCGTAAGGAGAGTGG	1816372	1816431	GAAGCCGCATCCAAAATGCACATGGAGACGGAGAGAAACATGAAACAAAATCAAATGGAG	1816416	1816426	+	0	30
KR314_X:16497991:C->G_1311	KR314	ACAACCAAGGTGTTATTTGGGGGNNNNNNNNNNCTTCAGCTTCCCGATATCCGACGGTAGTGTGCGAGAACGTGAGTGAC	X:16497925-16498024/17,23/+	0.986911	X	16497925	16497941	1	GCGAGAACGTGAGTGAC	16498002	16498024	1	ACAACCAAGGTGTTATTTGGGGG	16497942	16498001	ATTAAGAAAAGTTTTTATGTAAAAGCACGGTAATTTTGTAGTCAATGGCCAAAATCAAAG	16497986	16497996	+	0	34
LKC34_II:3120049:A->G_0172	LKC34	GCATCAGTCGCCGAGCAAGCNNNNNNNNNNCTTCAGCTTCCCGATATCCGACGGTAGTGTGAGTATTACTAGGGTTTACC	II:3119980-3120079/20,20/+	0.991539	II	3119980	3119999	1	GAGTATTACTAGGGTTTACC	3120060	3120079	1	GCATCAGTCGCCGAGCAAGC	3120000	3120059	GAAAAAAAAGAATAACAATTTCAGAAAAGTGCCACTGGAAACAAATCCGAGAAGCCTCAA	3120044	3120054	+	0	31
LKC34_III:9930207:C->T_0699	LKC34	TTGCCAACGTCAACTCCGTGNNNNNNNNNNCTTCAGCTTCCCGATATCCGACGGTAGTGTGCGTATTATAGGGTCGTGGA	III:9930138-9930237/20,20/+	0.988131	III	9930138	9930157	1	GCGTATTATAGGGTCGTGGA	9930218	9930237	1	TTGCCAACGTCAACTCCGTG	9930158	9930217	ATTTGGAAAATTAATTTAAATTGAACTTCTATAACCCCAAAAATTTCAACAATTGCAGCC	9930202	9930212	+	0	31
LKC34_IV:16717503:T->C_0926	LKC34	CGGGTCTTCCCGCGCCCCGNNNNNNNNNNCTTCAGCTTCCCGATATCCGACGGTAGTGTGTGGGCGGGGAACAGGAAGAG	IV:16717433-16717532/21,19/+	0.989701	IV	16717433	16717453	1	GTGGGCGGGGAACAGGAAGAG	16717514	16717532	1	CGGGTCTTCCCGCGCCCCG	16717454	16717513	CCAATTTGTGTCGATTTACAGAAAGCTTGTAAAGATAAAAAGACGTAAGTCAACATAGAT	16717498	16717508	+	0	30
LKC34_X:9974623:C->T_1226	LKC34	TTTTGCGGCGGCGACGTGTGNNNNNNNNNNCTTCAGCTTCCCGATATCCGACGGTAGTGTGCCGCCGATGTGTAGGAAAA	X:9974554-9974653/20,20/+	0.992017	X	9974554	9974573	1	GCCGCCGATGTGTAGGAAAA	9974634	9974653	1	TTTTGCGGCGGCGACGTGTG	9974574	9974633	AAGTTGAAGAAACGAAAAATGAAAGGAAGATTCTATGCCACCGCCACCCCTATTACGTAT	9974618	9974628	+	0	31
MY10_I:2148947:G->A_0126	MY10	CAGTGATTGGAGCAGCGTCNNNNNNNNNNCTTCAGCTTCCCGATATCCGACGGTAGTGTAACAAACAAACAAAAATCAGA	I:2148877-2148976/21,19/+	0.993405	I	2148877	2148897	1	AACAAACAAACAAAAATCAGA	2148958	2148976	1	CAGTGATTGGAGCAGCGTC	2148898	2148957	AAAAACAAAAAAACAGAAGAAAACAACAAGAATAGGGTGATCAATCCTCGGTGGCAGCGG	2148942	2148952	+	0	30
MY10_II:2879299:C->T_2231	MY10	GGTGTGTGGGCGGAGCTTGNNNNNNNNNNCTTCAGCTTCCCGATATCCGACGGTAGTGTGAAGGTCATGAGGGTTAACTG	II:2879229-2879328/21,19/+	0.992143	II	2879229	2879249	1	GAAGGTCATGAGGGTTAACTG	2879310	2879328	1	GGTGTGTGGGCGGAGCTTG	2879250	2879309	AAAGAAGAAGAAGGAATTTTACATCAAAAAGTGCTCTCACAACGATGCTCCGTTATTCCG	2879294	2879304	+	0	30
MY10_IV:4179751:G->A_2677	MY10	CTGAAGGTCGAGAAGGAGCNNNNNNNNNNCTTCAGCTTCCCGATATCCGACGGTAGTGTGGAACACGTCAGAAAGTAGTG	IV:4179681-4179780/21,19/+	0.990304	IV	4179681	4179701	1	GGAACACGTCAGAAAGTAGTG	4179762	4179780	1	CTGAAGGTCGAGAAGGAGC	4179702	4179761	GAAAAATCTGCCAAGCAAAAGCAAATGCACGATTTTTTGAATAGAAAACGGAAAATGGAC	4179746	4179756	+	0	30
MY10_X:5146613:G->T_3235	MY10	CTCAGACACGAGGAATTGACNNNNNNNNNNCTTCAGCTTCCCGATATCCGACGGTAGTGTGGAGTTGGAATGAGCTTCTG	X:5146586-5146685/20,20/-	0.989026	X	5146666	5146685	1	GGAGTTGGAATGAGCTTCTG	5146586	5146605	1	CTCAGACACGAGGAATTGAC	5146606	5146665	ATTACAATTTTGTGCAACATAAAATAGCAAAAAATAAACAATTGCCGTAGCACTAAAACT	5146608	5146618	-	0	28
MY16_II:1895575:A->G_0061	MY16	TCATCCTCTACCTGCTCGTCNNNNNNNNNNCTTCAGCTTCCCGATATCCGACGGTAGTGTTTGGACATCTCTTTTGTCAGT	II:1895505-1895604/21,20/+	0.985287	II	1895505	1895525	1	TTGGACATCTCTTTTGTCAGT	1895585	1895604	1	TCATCCTCTACCTGCTCGTC	1895526	1895584	GCTCCATATAAAAAGGGGTTATGTAGAAAAGTACAATCACAACTCACTCAACATGAATT	1895570	1895580	+	0	30
MY16_V:13037037:A->T_0241	MY16	TGATGTACTTACAAGGGAAGTCTNNNNNNNNNNCTTCAGCTTCCCGATATCCGACGGTAGTGTTGGAAGCGAAGGAAATG	V:13036971-13037070/17,23/+	0.98137	V	13036971	13036987	1	TGGAAGCGAAGGAAATG	13037048	13037070	1	TGATGTACTTACAAGGGAAGTCT	13036988	13037047	AGAAAAAGAAAGAAAAACATGAATAGAATACGTTAATGGATAGAATCACAGGAAATTGTT	13037032	13037042	+	0	34
MY16_V:19311433:G->T_0296	MY16	GCGGAATGGGTTTGACGTGNNNNNNNNNNCTTCAGCTTCCCGATATCCGACGGTAGTGTAAGCCCTACCCATAGCAAGCG	V:19311363-19311462/21,19/+	0.980984	V	19311363	19311383	1	AAGCCCTACCCATAGCAAGCG	19311444	19311462	1	GCGGAATGGGTTTGACGTG	19311384	19311443	CGCGCACTGTGCAGTGCATTTTTTTTCCACTTCTACGGCTTTAAAGGGAGGCGCTTTTAT	19311428	19311438	+	0	30
MY16_V:20214591:G->A_0329	MY16	CCGTCACAACTTCGCTGTACGGNNNNNNNNNNCTTCAGCTTCCCGATATCCGACGGTAGTGTTGAGCACAGTGAGATCTG	V:20214529-20214628/18,22/+	0.980522	V	20214529	20214546	1	TGAGCACAGTGAGATCTG	20214607	20214628	1	CCGTCACAACTTCGCTGTACGG	20214547	20214606	GGAAATTGAGTTACCTGAAATAATTTTTTAGAATTTTTTCTGAGGAAATAAACAAAATTA	20214586	20214596	+	0	38
MY18_I:1222705:A->T_0006	MY18	GGACCGAGGTTTGGGCTGAAAAAGNNNNNNNNNNCTTCAGCTTCCCGATATCCGACGGTAGTGTTGGGTGAGGAGTACGG	I:1222668-1222767/16,24/-	0.983926	I	1222752	1222767	1	TGGGTGAGGAGTACGG	1222668	1222691	1	GGACCGAGGTTTGGGCTGAAAAAG	1222692	1222751	TATGATTATCACCGCAGGCCGCCTCAACAACGCCTAGGCCGTCCATTTGGTGAACATGTT	1222700	1222710	-	0	38
MY18_II:1787275:A->G_0044	MY18	TACATCTAAAACCAACGACTTGGNNNNNNNNNNCTTCAGCTTCCCGATATCCGACGGTAGTGTCAGGAATTCAGACACGT	II:1787209-1787308/17,23/+	0.980459	II	1787209	1787225	1	CAGGAATTCAGACACGT	1787286	1787308	1	TACATCTAAAACCAACGACTTGG	1787226	1787285	AAAAACATTTATTAAAAAGTCACAGTAATTCAAAACCAGTAAGAAACAGAAAAAAAGTTA	1787270	1787280	+	0	34
MY18_II:2428802:A->G_0046	MY18	GCAAGTCGGCAAACCGGCAAANNNNNNNNNNCTTCAGCTTCCCGATATCCGACGGTAGTGTCATTCCGGCAAATCAGCAA	II:2428734-2428833/19,21/+	0.982281	II	2428734	2428752	1	CATTCCGGCAAATCAGCAA	2428813	2428833	9	GCAAGTCGGCAAACCGGCAAA	2428753	2428812	GCCGGCAATTTGCCGATTTGCCAAATTTGCCGGAAAAAAGGCAATTGCCAAAAATTTTCG	2428797	2428807	+	0	32
MY18_II:2622330:A->C_0049	MY18	TAGATAGGCAGGGCAGGCAGGCAGNNNNNNNNNNCTTCAGCTTCCCGATATCCGACGGTAGTGTAGGCAAGTAATAGGCG	II:2622294-2622393/16,24/-	0.980622	II	2622378	2622393	1	AGGCAAGTAATAGGCG	2622294	2622317	1	TAGATAGGCAGGGCAGGCAGGCAG	2622318	2622377	TTTTAAACAAAAAGTCAGGCATGAGATAGGCATGTAGACAGCGAGCGTGGAGTAGGCACG	2622325	2622335	-	0	37
MY2147_I:7395710:G->A_0058	MY2147	GGCAGGGGACACCTTCCAANNNNNNNNNNCTTCAGCTTCCCGATATCCGACGGTAGTGTCGGGGTTGGCGGCAATTTTAT	I:7395640-7395739/21,19/+	0.994692	I	7395640	7395660	1	CGGGGTTGGCGGCAATTTTAT	7395721	7395739	1	GGCAGGGGACACCTTCCAA	7395661	7395720	TATATCTTCTTTTATACTAAACAAATTCAAATTAAAACAAAACCTGAAAGTGATAAAAAA	7395705	7395715	+	0	30
MY2147_II:7858153:A->G_0136	MY2147	GCCTTACTTCGATCATCTCGNNNNNNNNNNCTTCAGCTTCCCGATATCCGACGGTAGTGTCATGTTGTGCTGTAGCTGCT	II:7858084-7858183/20,20/+	0.98772	II	7858084	7858103	1	CATGTTGTGCTGTAGCTGCT	7858164	7858183	1	GCCTTACTTCGATCATCTCG	7858104	7858163	GTAACGCTTTATCCAAAATATCATCATGATTATTATAAAAACGCACAAAAAGAGGAACGG	7858148	7858158	+	0	31
MY2147_IV:8817919:A->T_0350	MY2147	GGTCGCGGTGGACAACAAGNNNNNNNNNNCTTCAGCTTCCCGATATCCGACGGTAGTGTTGGATGGGGTAACCAAGGAGG	IV:8817849-8817948/21,19/+	0.990849	IV	8817849	8817869	1	TGGATGGGGTAACCAAGGAGG	8817930	8817948	1	GGTCGCGGTGGACAACAAG	8817870	8817929	TCAACAAGGAGGTTAGTGTTATCTTTTAATATATGTATAAAAACATTTCAACATTTAGGA	8817914	8817924	+	0	30
MY2147_V:20500817:C->T_0825	MY2147	GGTTGGCCAACACTCTGAGNNNNNNNNNNCTTCAGCTTCCCGATATCCGACGGTAGTGTAATAATAAGAGGACACGGGGT	V:20500747-20500846/21,19/+	0.991639	V	20500747	20500767	1	AATAATAAGAGGACACGGGGT	20500828	20500846	1	GGTTGGCCAACACTCTGAG	20500768	20500827	TCAAAATAAAAATTGGAAAGTAGAAAAATTTGAAAAAAAATTGATCAAGCGACAATTCTA	20500812	20500822	+	0	30
MY23_I:2830426:G->A_0275	MY23	GAGAGGGGAAAGACGCGGGNNNNNNNNNNCTTCAGCTTCCCGATATCCGACGGTAGTGTCGGAAAAATGGAGGGAAAAGA	I:2830356-2830455/21,19/+	0.992899	I	2830356	2830376	1	CGGAAAAATGGAGGGAAAAGA	2830437	2830455	1	GAGAGGGGAAAGACGCGGG	2830377	2830436	AGCACGGAACCATTTAAAACAAGAAAAAAGGGGGACTAGGTCCGCGGAAGTTAGGCCATG	2830421	2830431	+	0	30
MY23_II:13379927:A->G,T_0536	MY23	GTTAGGGCAATTCGGACGGNNNNNNNNNNCTTCAGCTTCCCGATATCCGACGGTAGTGTAAAGCAATATCCACACACAAA	II:13379857-13379956/21,19/+	0.982817	II	13379857	13379877	1	AAAGCAATATCCACACACAAA	13379938	13379956	2	GTTAGGGCAATTCGGACGG	13379878	13379937	CCTCAGTTGAAACCTGAAAAGAAGCGAGATCTGAAAAATGCCTGAAAAAATTGGCTCCGA	13379922	13379932	+	0	30
MY23_III:6291822:A->T_1070	MY23	TGCAAGAGGGGAGGAGCCANNNNNNNNNNCTTCAGCTTCCCGATATCCGACGGTAGTGTAACTGAGATGAAAGGAAAAAG	III:6291752-6291851/21,19/+	0.994349	III	6291752	6291772	1	AACTGAGATGAAAGGAAAAAG	6291833	6291851	1	TGCAAGAGGGGAGGAGCCA	6291773	6291832	CAAGAAAAGAAAAAAGCAAAAAGGCGTGAGGCATTGTGCAAAATTTGTGAACCAAAAAAG	6291817	6291827	+	0	30
MY23_V:20322393:G->A_1540	MY23	CAAGAAGGATAAAGAGGACGCNNNNNNNNNNCTTCAGCTTCCCGATATCCGACGGTAGTGTGAGCCAAGAAAGACGAAGA	V:20322325-20322424/19,21/+	0.985138	V	20322325	20322343	1	GAGCCAAGAAAGACGAAGA	20322404	20322424	1	CAAGAAGGATAAAGAGGACGC	20322344	20322403	AAGAGCCAAGAAAGATAAGCGTGATGCGGAGGAAAGACGGAAGAAGGACGAAGAAAGAGC	20322388	20322398	+	0	32
MY2453_I:1768407:A->T_0018	MY2453	TTTGAAGGCGTGCTCCGGCNNNNNNNNNNCTTCAGCTTCCCGATATCCGACGGTAGTGTCTTTTCGGCGCTGATTGATGG	I:1768337-1768436/21,19/+	0.983892	I	1768337	1768357	1	CTTTTCGGCGCTGATTGATGG	1768418	1768436	1	TTTGAAGGCGTGCTCCGGC	1768358	1768417	AAAAAGTCTCGACACGAGTGTTAATGTATCATTTGAACAAATGAATTTGAGCCGACAGAT	1768402	1768412	+	0	30
MY2453_II:681909:A->G_0119	MY2453	GCCGGTTTGCCGGAATTTTTCAGNNNNNNNNNNCTTCAGCTTCCCGATATCCGACGGTAGTGTAAAAGGGCAAAATCACA	II:681843-681942/17,23/+	0.980995	II	681843	681859	1	AAAAGGGCAAAATCACA	681920	681942	8	GCCGGTTTGCCGGAATTTTTCAG	681860	681919	ATTCGCCGAACACTTTTGGCAATTGTGGTTTTTCCGGCAAATTTGGAAAATTGACAATTT	681904	681914	+	0	34
MY2453_III:1068285:A->G_0364	MY2453	CCGCGCGCCGGCACGGCTTNNNNNNNNNNCTTCAGCTTCCCGATATCCGACGGTAGTGTCGGGGAGGCAGTGTGGCTGGT	III:1068215-1068314/21,19/+	0.988591	III	1068215	1068235	1	CGGGGAGGCAGTGTGGCTGGT	1068296	1068314	1	CCGCGCGCCGGCACGGCTT	1068236	1068295	GGACAGCAGGAGTGTGCTGAAACACACTCAAAATTAGACAATTTTTTTTAGACCAAAAGC	1068280	1068290	+	0	30
MY2453_X:6949735:G->A_0822	MY2453	AACTCGAAAGGTTTCCCTGTGNNNNNNNNNNCTTCAGCTTCCCGATATCCGACGGTAGTGTATGCAAAAGTACGCAGTAG	X:6949667-6949766/19,21/+	0.988639	X	6949667	6949685	1	ATGCAAAAGTACGCAGTAG	6949746	6949766	1	AACTCGAAAGGTTTCCCTGTG	6949686	6949745	AAGCGGAAGAAAAATAGAGCTAGAAAAAAACAAATATGTTAAACAGACAGAGGTGGATGA	6949730	6949740	+	0	32
MY2741_I:1388481:C->A_0002	MY2741	GCCATGGCCTAGATGCAACNNNNNNNNNNCTTCAGCTTCCCGATATCCGACGGTAGTGTGGGAAAAGGCTGTGAAAAACG	I:1388454-1388553/21,19/-	0.98086	I	1388533	1388553	5	GGGAAAAGGCTGTGAAAAACG	1388454	1388472	1	GCCATGGCCTAGATGCAAC	1388473	1388532	AAAGAAAACAGGCGGAAAACAAAGCAAGATAAATGGCCGCTGAAACTTGTCGGCCCCTCG	1388476	1388486	-	0	28
MY2741_II:3362289:G->A_0067	MY2741	GGGAGATGATTCCTGTGTCGNNNNNNNNNNCTTCAGCTTCCCGATATCCGACGGTAGTGTCGGGGTAGTGGTGATGGAGA	II:3362220-3362319/20,20/+	0.981877	II	3362220	3362239	1	CGGGGTAGTGGTGATGGAGA	3362300	3362319	1	GGGAGATGATTCCTGTGTCG	3362240	3362299	CGGCTGAAGAAGAATCCAGGAGGTGGATTGTCTGAAAATTGAAGATTTAGAGATTGGTCT	3362284	3362294	+	0	31
MY2741_V:11214926:A->G_0175	MY2741	TTTCAGATGAGCTCCCCAAGCNNNNNNNNNNCTTCAGCTTCCCGATATCCGACGGTAGTGTAACGCTAGCGATTTCCAGC	V:11214858-11214957/19,21/+	0.981471	V	11214858	11214876	1	AACGCTAGCGATTTCCAGC	11214937	11214957	1	TTTCAGATGAGCTCCCCAAGC	11214877	11214936	AGCGAAAGCGAAAAGAAAAATACATCACATCGTTTGGTTTAATTTAATGACACTCTCGAA	11214921	11214931	+	0	32
MY2741_X:12245473:C->T_0220	MY2741	AGTGCAGGCTGCACTAATTGGCNNNNNNNNNNCTTCAGCTTCCCGATATCCGACGGTAGTGTGAAAAGGTGGAAACATGG	X:12245406-12245505/18,22/+	0.986269	X	12245406	12245423	1	GAAAAGGTGGAAACATGG	12245484	12245505	1	AGTGCAGGCTGCACTAATTGGC	12245424	12245483	AAACACATAAAATCAGAAGAAAAAAATAAAATTTTATTCGTTTCTTCAGCTTAGTGTTGA	12245468	12245478	+	0	33
N2_I:12042548:G->C_0004	N2	CTTTTTTTCACTGAAAATTGAAAAAAAAGNNNNNNNNNNCTTCAGCTTCCCGATATCCGACGGTAGTGTGTCGATTTCAAGGTGA	I:12042520-12042569/16,29/-	0.946771	I	12042554	12042569	2	GTCGATTTCAAGGTGA	12042520	12042548	1	CTTTTTTTCACTGAAAATTGAAAAAAAAG	12042549	12042553	AAATG	12042543	12042553	-	0	29
N2_III:2770134:T->G_0007	N2	GGGGGTATGGGAATTTTGCTTTAAAAANNNNNNNNNNCTTCAGCTTCCCGATATCCGACGGTAGTGTTTAAGGAGAGGGGGGGGG	III:2770112-2770161/18,27/+	9.66e-05	III	2770112	2770129	2	TTAAGGAGAGGGGGGGGG	2770135	2770161	1	GGGGGTATGGGAATTTTGCTTTAAAAA	2770130	2770134	GGGGT	2770129	2770139	+	0	28
N2_III:7447025:C->G_0007	N2	GAGTAAAATATGGTGAGAAGCNNNNNNNNNNCTTCAGCTTCCCGATATCCGACGGTAGTGTGTGAGTAAAATATGGTGGG	III:7447000-7447049/19,21/+	0.980053	III	7447000	7447018	2	GTGAGTAAAATATGGTGGG	7447029	7447049	2	GAGTAAAATATGGTGAGAAGC	7447019	7447028	AAGCCACAGA	7447020	7447030	+	0	25
N2_V:12775675:A->T_0012	N2	AAATTATTTTTCTAATTATTTATTTANNNNNNNNNNCTTCAGCTTCCCGATATCCGACGGTAGTGTGAAAGTAATCTTTAATAA	V:12775651-12775700/18,26/+	0.0189906	V	12775651	12775668	1	GAAAGTAATCTTTAATAA	12775675	12775700	1	AAATTATTTTTCTAATTATTTATTTA	12775669	12775674	TTTCCT	12775670	12775680	+	0	26
NIC195_I:9787695:T->C_0093	NIC195	TGCTAGCTCTCAAGAGTATTGCGNNNNNNNNNNCTTCAGCTTCCCGATATCCGACGGTAGTGTTAACGAGATGGAGAAGG	I:9787629-9787728/17,23/+	0.984237	I	9787629	9787645	1	TAACGAGATGGAGAAGG	9787706	9787728	1	TGCTAGCTCTCAAGAGTATTGCG	9787646	9787705	TTTGGGATATAAAATTTATGAGCCTCCAAATGAAACAAACCCAATTGCATACATATGAAA	9787690	9787700	+	0	34
NIC195_III:12677731:C->G,T_0554	NIC195	TCCTCGCGGTTGATTGTTTGNNNNNNNNNNCTTCAGCTTCCCGATATCCGACGGTAGTGTGGATTCCGGCGAAAAGTTAG	III:12677662-12677761/20,20/+	0.982849	III	12677662	12677681	1	GGATTCCGGCGAAAAGTTAG	12677742	12677761	1	TCCTCGCGGTTGATTGTTTG	12677682	12677741	AGTTATTCGAGTTTTGGAGTAAAAAAAAACAAAAAAAAAATCTAAAATTCGGTTTTTGAC	12677726	12677736	+	0	31
NIC195_IV:2651378:G->T_0593	NIC195	AGTTCAATGGAGCGCGTTTGCGNNNNNNNNNNCTTCAGCTTCCCGATATCCGACGGTAGTGTCGGTAGAGCGCAGTTGCC	IV:2651311-2651410/18,22/+	0.983675	IV	2651311	2651328	1	CGGTAGAGCGCAGTTGCC	2651389	2651410	1	AGTTCAATGGAGCGCGTTTGCG	2651329	2651388	CAATAAAGTTTTTTTTTTAAATTCAGTAATATTCAACAGTTTCAGCCAAGTAATGATAAA	2651372	2651383	+	0	33
NIC195_V:1868780:G->A_0746	NIC195	TGCGTCAGTGACGGGGTTGNNNNNNNNNNCTTCAGCTTCCCGATATCCGACGGTAGTGTGAAAAACTCTTCAAAAACGCC	V:1868710-1868809/21,19/+	0.99391	V	1868710	1868730	1	GAAAAACTCTTCAAAAACGCC	1868791	1868809	1	TGCGTCAGTGACGGGGTTG	1868731	1868790	TGGAAATAAGGAAAATAAAGATTAAAAATTTTGCACCGCAAACGCGCAAGCGACGAGAAA	1868775	1868785	+	0	30
NIC199_I:849042:T->A_0006	NIC199	TCCTATTCCCTTCGTGGCCNNNNNNNNNNCTTCAGCTTCCCGATATCCGACGGTAGTGTTTTCTACGTGGCGTGGCCGTG	I:848972-849071/21,19/+	0.98642	I	848972	848992	1	TTTCTACGTGGCGTGGCCGTG	849053	849071	1	TCCTATTCCCTTCGTGGCC	848993	849052	TACGAGAAAATTCGGCCACCAAATTCTTTTTTAAGGCCAAACCTCCAAATCCTTCAGAGC	849037	849047	+	0	30
NIC199_II:14732413:C->T_0217	NIC199	TGGTTCCGCGGGATTTTTGNNNNNNNNNNCTTCAGCTTCCCGATATCCGACGGTAGTGTGTGAAGTTGACTTCTGGCGAA	II:14732343-14732442/21,19/+	0.981984	II	14732343	14732363	1	GTGAAGTTGACTTCTGGCGAA	14732424	14732442	1	TGGTTCCGCGGGATTTTTG	14732364	14732423	GACCACAAGATATAAAAAGTGTCGGTTACTAAACACAATCGGCGGGCGACCACATTTTAA	14732408	14732418	+	0	30
NIC199_III:3799559:A->T_0280	NIC199	CGAGGCGCAGAAATAGAGGNNNNNNNNNNCTTCAGCTTCCCGATATCCGACGGTAGTGTGAAACGAGCGTGGCGGCGACG	III:3799489-3799588/21,19/+	0.991786	III	3799489	3799509	1	GAAACGAGCGTGGCGGCGACG	3799570	3799588	1	CGAGGCGCAGAAATAGAGG	3799510	3799569	ACAGAAACGATGAAAACTATGAAATTAAACAATCGATCTGTGAATTTTGAAAAAAAGCAG	3799554	3799564	+	0	30
NIC199_IV:49034:A->C_0379	NIC199	GGCGGAATGGGAAATGGTTNNNNNNNNNNCTTCAGCTTCCCGATATCCGACGGTAGTGTGTGGTTTGTGTAGGGTGGGGA	IV:48964-49063/21,19/+	0.995681	IV	48964	48984	1	GTGGTTTGTGTAGGGTGGGGA	49045	49063	1	GGCGGAATGGGAAATGGTT	48985	49044	GGTGCGCAATAAAGACGAACGAACGAAAATTCGAATAGATTTGACGGTAAGATATGCGGG	49029	49039	+	0	30
NIC251_II:11260257:A->G_1138	NIC251	GAGTTGACGGATTGTGGGAATGTGNNNNNNNNNNCTTCAGCTTCCCGATATCCGACGGTAGTGTTGGGGGGTGCATTCAC	II:11260192-11260291/16,24/+	0.997192	II	11260192	11260207	1	TGGGGGGTGCATTCAC	11260268	11260291	1	GAGTTGACGGATTGTGGGAATGTG	11260208	11260267	ACTTCAAGTTATACAAAAAATCCTATCAATAAAAGGAAAAAGAAACGGGAAAGGTGAATT	11260252	11260262	+	0	35
NIC251_III:11187641:A->T_1453	NIC251	GTGTTTGAGAGAAAAGTTCAGGGGNNNNNNNNNNCTTCAGCTTCCCGATATCCGACGGTAGTGTGTGAAAAAAAAGCCGA	III:11187576-11187675/16,24/+	0.984461	III	11187576	11187591	1	GTGAAAAAAAAGCCGA	11187652	11187675	1	GTGTTTGAGAGAAAAGTTCAGGGG	11187592	11187651	AAAGAGAAAAGTACAAGCTGACCACTACAATTATGTTCAACTGTCTGCTATCGCATTGAC	11187636	11187646	+	0	35
NIC251_V:7051301:G->T_2385	NIC251	CTCCATCGTTACGCGGCGCNNNNNNNNNNCTTCAGCTTCCCGATATCCGACGGTAGTGTTCAATGACCAGGCACGGAAGA	V:7051231-7051330/21,19/+	0.997123	V	7051231	7051251	1	TCAATGACCAGGCACGGAAGA	7051312	7051330	1	CTCCATCGTTACGCGGCGC	7051252	7051311	GTTGAAATTTTAATTACGAAAATTAAAAAAAAATTATCTCGCGAAAAATGCACAACGATG	7051296	7051306	+	0	30
NIC251_X:12457598:G->A_3782	NIC251	CGAGCTCTAAACGGTCCAAAGNNNNNNNNNNCTTCAGCTTCCCGATATCCGACGGTAGTGTAAGGAGCGTCAGGAGAGAA	X:12457530-12457629/19,21/+	0.990313	X	12457530	12457548	1	AAGGAGCGTCAGGAGAGAA	12457609	12457629	1	CGAGCTCTAAACGGTCCAAAG	12457549	12457608	AAGAGAAGGAACACGATGAGCAAAAGAAAAGACACCGCGACAATGAAGAGGGAGCTGGAT	12457593	12457603	+	0	32
NIC252_I:11562711:A->G_0313	NIC252	GGGCAGTTTGTCGGTTTGCNNNNNNNNNNCTTCAGCTTCCCGATATCCGACGGTAGTGTTAGTCGTTGAGGGTGGCTTCC	I:11562641-11562740/21,19/+	0.990198	I	11562641	11562661	1	TAGTCGTTGAGGGTGGCTTCC	11562722	11562740	1	GGGCAGTTTGTCGGTTTGC	11562662	11562721	TGGAAATAGAGGCATAGATTTTGATTGCCGATTTGCCGGTTTGCCGGAAATTTTCAATTC	11562706	11562716	+	0	30
NIC252_II:12805383:C->A_1095	NIC252	GGCTGCGGCGGGGGCCTGGNNNNNNNNNNCTTCAGCTTCCCGATATCCGACGGTAGTGTAAGAATTTCGGGGCAAAAATG	II:12805313-12805412/21,19/+	0.98626	II	12805313	12805333	1	AAGAATTTCGGGGCAAAAATG	12805394	12805412	1	GGCTGCGGCGGGGGCCTGG	12805334	12805393	ATGAAAATCGCCCTAAAATGCCACGATGGGGGGAAAAATCGATAAATGTCGGTCATTCAT	12805378	12805388	+	0	30
NIC252_III:11662725:A->T_1204	NIC252	CGTCAGCACGTGCCTAACCNNNNNNNNNNCTTCAGCTTCCCGATATCCGACGGTAGTGTGAATACACACGTGGTGCCAGG	III:11662655-11662754/21,19/+	0.983972	III	11662655	11662675	1	GAATACACACGTGGTGCCAGG	11662736	11662754	1	CGTCAGCACGTGCCTAACC	11662676	11662735	CTGTCCCATCACGGCTTGATCTACAAAAAATGCGGGAATTTTTTGCCCAAAATAATATGA	11662720	11662730	+	0	30
NIC252_IV:11069611:C->T_1322	NIC252	TGCACCAAAGATGCAACATTTGNNNNNNNNNNCTTCAGCTTCCCGATATCCGACGGTAGTGTCCAGCTGAAGATGGTAGC	IV:11069544-11069643/18,22/+	0.9924	IV	11069544	11069561	1	CCAGCTGAAGATGGTAGC	11069622	11069643	1	TGCACCAAAGATGCAACATTTG	11069562	11069621	AAGGAAAAATCAAAGAGTAAAAGTAACGAATCAAAAGACTCAAAAAATTCGAAAAACTTG	11069606	11069616	+	0	33
NIC256_II:14311740:A->G_0076	NIC256	GAACAACAAAAACACATTTGCGGNNNNNNNNNNCTTCAGCTTCCCGATATCCGACGGTAGTGTCTCTTAGAGACCATAGA	II:14311674-14311773/17,23/+	0.983996	II	14311674	14311690	1	CTCTTAGAGACCATAGA	14311751	14311773	1	GAACAACAAAAACACATTTGCGG	14311691	14311750	TCACCATAAAAACAACATGCAAACAGCTGAGAGAGAGAGAGTGGAAAAAAAAAGAAAAGT	14311735	14311745	+	0	34
NIC256_II:910005:G->A_0039	NIC256	ATCAACAAAACCTCCTACACCNNNNNNNNNNCTTCAGCTTCCCGATATCCGACGGTAGTGTATGCCCATCACTCCAGCTT	II:909937-910036/19,21/+	0.984679	II	909937	909955	1	ATGCCCATCACTCCAGCTT	910016	910036	1	ATCAACAAAACCTCCTACACC	909956	910015	CTAGAAAAACATGCTCCTCTGAAAATCAAAAAATTGAAAATCAACGAATGCAGTGTGACT	910000	910010	+	0	32
NIC256_III:617398:G->A_0082	NIC256	TTTCTCGTGTGTGTAGTGGCGTCNNNNNNNNNNCTTCAGCTTCCCGATATCCGACGGTAGTGTCAAAACCAAAAATCTTA	III:617332-617431/17,23/+	0.985738	III	617332	617348	1	CAAAACCAAAAATCTTA	617409	617431	1	TTTCTCGTGTGTGTAGTGGCGTC	617349	617408	CCTGAATATAGTACAAAACCAACGAGAAAAACGGTGAAAATCGCAAAATGCCTGGTCATT	617393	617403	+	0	34
NIC256_X:10575306:G->A_0205	NIC256	CGGTGTGAGGTTGCTAGAGNNNNNNNNNNCTTCAGCTTCCCGATATCCGACGGTAGTGTGTGGGACCCTTGGAATTCAAA	X:10575273-10575372/21,19/-	0.987113	X	10575352	10575372	1	GTGGGACCCTTGGAATTCAAA	10575273	10575291	1	CGGTGTGAGGTTGCTAGAG	10575292	10575351	CAAATAAGTTAAACAAACAATTAATAATTAAATTTGGCATAAGATCAGGGGATTGGGGAT	10575301	10575311	-	0	34
NIC258_I:3170723:G->T,A_0026	NIC258	CCGGCAAACCGCTAATTTGCCGNNNNNNNNNNCTTCAGCTTCCCGATATCCGACGGTAGTGTAAATTTTTCCGACAAACCGAC	I:3170653-3170752/21,22/+	0.98513	I	3170653	3170673	1	AAATTTTTCCGACAAACCGAC	3170731	3170752	1	CCGGCAAACCGCTAATTTGCCG	3170674	3170730	AAATCGCCGGAAATTAAGTTTTCCGGAAAACCAACAAATTGGTGGAAATGAAATTTT	3170718	3170728	+	0	30
NIC258_II:1729029:G->A_0091	NIC258	AGCATGATGGTGTGCTGGTGGTGNNNNNNNNNNCTTCAGCTTCCCGATATCCGACGGTAGTGTTGATTGGTGTTGTGCGA	II:1728963-1729062/17,23/+	0.980733	II	1728963	1728979	1	TGATTGGTGTTGTGCGA	1729040	1729062	1	AGCATGATGGTGTGCTGGTGGTG	1728980	1729039	CGTACGAATGCGAACTTACGCCGTTTCGATTATACGGGAATATGTTCGGGGCTTCGACGA	1729024	1729034	+	0	34
NIC258_IV:8734202:A->T_0229	NIC258	ATGGCCATCGTATAATGGATCTGGNNNNNNNNNNCTTCAGCTTCCCGATATCCGACGGTAGTGTTTGGTGGTGCAATGGG	IV:8734137-8734236/16,24/+	0.980624	IV	8734137	8734152	1	TTGGTGGTGCAATGGG	8734213	8734236	1	ATGGCCATCGTATAATGGATCTGG	8734153	8734212	AACTGGTTATGCTCATCCATTCCATCTTCATGGACATCATTTTTATGTGATGAAAGTTGG	8734197	8734207	+	0	35
NIC258_V:11639247:G->A_0322	NIC258	GAAAGCATTTTCGTTCTGCNNNNNNNNNNCTTCAGCTTCCCGATATCCGACGGTAGTGTAGGCGGCTCGGCTTAATTGAA	V:11639177-11639276/21,19/+	0.992204	V	11639177	11639197	1	AGGCGGCTCGGCTTAATTGAA	11639258	11639276	1	GAAAGCATTTTCGTTCTGC	11639198	11639257	ATGAGCAACAGAAAAGACAGAAAGCAGTAGAAGAACATAAATGAGCGGGGAAAAAAAAAA	11639242	11639252	+	0	30
NIC260_II:12935467:A->T_0102	NIC260	GCCTGCCTGCCTGCAAGGAAACCNNNNNNNNNNCTTCAGCTTCCCGATATCCGACGGTAGTGTGCGAAAAATTGAATGCA	II:12935401-12935500/17,23/+	0.983942	II	12935401	12935417	1	GCGAAAAATTGAATGCA	12935478	12935500	1	GCCTGCCTGCCTGCAAGGAAACC	12935418	12935477	AGTAGGTTTTCAAAGATTCCAGAGCTAAAATAGGATTGAATTGAAATTTAAAAAAAAAAC	12935462	12935472	+	0	34
NIC260_IV:3955433:A->G_0189	NIC260	CGCATTTTGTGGGACTGAGAAGNNNNNNNNNNCTTCAGCTTCCCGATATCCGACGGTAGTGTGTTAATCTCGGCGGGGGT	IV:3955366-3955465/18,22/+	0.982299	IV	3955366	3955383	1	GTTAATCTCGGCGGGGGT	3955444	3955465	1	CGCATTTTGTGGGACTGAGAAG	3955384	3955443	GATTGCAGGCTTGTATTGGCAGAGAGCTTGCAACTCCACTTTTCCATTAATCTTGATCAT	3955428	3955438	+	0	33
NIC260_V:4630618:A->G_0253	NIC260	TCGGAGGCGATTTTCGGGCNNNNNNNNNNCTTCAGCTTCCCGATATCCGACGGTAGTGTCGTGAAAGGGGCAAGTGGTCA	V:4630548-4630647/21,19/+	0.99494	V	4630548	4630568	1	CGTGAAAGGGGCAAGTGGTCA	4630629	4630647	1	TCGGAGGCGATTTTCGGGC	4630569	4630628	AAACTTGGAAATTAACAAGAAAATGATGGGAGGAAAAATAAGGCGAGTCAGGGGCGCCTA	4630613	4630623	+	0	30
NIC260_X:6160622:C->G_0381	NIC260	AGCAGAATTCAGAAGAAGGAGCGNNNNNNNNNNCTTCAGCTTCCCGATATCCGACGGTAGTGTGGTCGCAAAAATAGCGG	X:6160556-6160655/17,23/+	0.981999	X	6160556	6160572	1	GGTCGCAAAAATAGCGG	6160633	6160655	1	AGCAGAATTCAGAAGAAGGAGCG	6160573	6160632	AACGAGCAAATACGATTTGAAAAGAGGGAAAAATGATGATACCGTTGGGCAATGTAAGAG	6160617	6160627	+	0	34
NIC261_II:14640296:T->C_0101	NIC261	TGGTTCTAAGAGTTTTGTTCTGACNNNNNNNNNNCTTCAGCTTCCCGATATCCGACGGTAGTGTGCACCATTGTTGACAG	II:14640232-14640331/16,24/+	0.982965	II	14640232	14640247	1	GCACCATTGTTGACAG	14640308	14640331	1	TGGTTCTAAGAGTTTTGTTCTGAC	14640248	14640307	GGAAAACGAAAGCAATCGGGGGCCGAGGTAACATAGAAAAATTGAAAATTACAAAAAAAT	14640291	14640301	+	0	36
NIC261_V:19431092:T->C_0303	NIC261	GTAGTGATTTTGGTGGGCGGNNNNNNNNNNCTTCAGCTTCCCGATATCCGACGGTAGTGTAAGAAACATCCCTAAATAGG	V:19431031-19431130/20,20/+	0.981344	V	19431031	19431050	1	AAGAAACATCCCTAAATAGG	19431111	19431130	2	GTAGTGATTTTGGTGGGCGG	19431051	19431110	CTGAAACTCTCTGGAAAATGTCTCTGATGGCTTGAAGGAATTGAGTCCAGTAGACTAGAA	19431050	19431097	+	0	39
NIC261_X:4756862:G->C_0339	NIC261	AAAACCCTCGCCACTACGCNNNNNNNNNNCTTCAGCTTCCCGATATCCGACGGTAGTGTACCACCGCTTGCTACAAACGG	X:4756792-4756891/21,19/+	0.993867	X	4756792	4756812	1	ACCACCGCTTGCTACAAACGG	4756873	4756891	1	AAAACCCTCGCCACTACGC	4756813	4756872	CAAAAAATTTGAAAACTGACTAGAACGCGAATTGGTACCAACACATAAGGTCAGCAAACA	4756857	4756867	+	0	30
NIC261_X:6698363:C->T_0352	NIC261	GTCATTCGCTGCGGGCTGTGNNNNNNNNNNCTTCAGCTTCCCGATATCCGACGGTAGTGTACAAAAAGAATACAGCAGAG	X:6698294-6698393/20,20/+	0.991752	X	6698294	6698313	1	ACAAAAAGAATACAGCAGAG	6698374	6698393	1	GTCATTCGCTGCGGGCTGTG	6698314	6698373	TAAAATCAAAATTGATAGCCGCATAGTTCAATTATTTGAATACAAATTTCGCTCAAAATG	6698358	6698368	+	0	31
NIC262_I:13467502:T->A_0073	NIC262	GTGGTTTTGTAGTTTGTAGTGTGNNNNNNNNNNCTTCAGCTTCCCGATATCCGACGGTAGTGTGCGAAAATCACACAAAA	I:13467436-13467535/17,23/+	0.987641	I	13467436	13467452	1	GCGAAAATCACACAAAA	13467513	13467535	1	GTGGTTTTGTAGTTTGTAGTGTG	13467453	13467512	TTTGTGGAAAAATGGTGTATTTTACAGACTACAAACTACAGAACCTGCATTTACAGGGCT	13467497	13467507	+	0	34
NIC262_III:12674518:A->G_0306	NIC262	TCAGGAAAAACCGTGCCGCAGGNNNNNNNNNNCTTCAGCTTCCCGATATCCGACGGTAGTGTAAATAACAAAAATGGCCG	III:12674451-12674550/18,22/+	0.982774	III	12674451	12674468	1	AAATAACAAAAATGGCCG	12674529	12674550	1	TCAGGAAAAACCGTGCCGCAGG	12674469	12674528	AAATTTGAGTTTTTCTTTCGAAAAATCAAAAATTTTCAGCCGAAAAAAAACCACAAAAAA	12674513	12674523	+	0	33
NIC262_V:1331964:A->T_0421	NIC262	GCATATGCCGTTATGCCGTTNNNNNNNNNNCTTCAGCTTCCCGATATCCGACGGTAGTGTGCCGAAAATGACGTTATGCC	V:1331895-1331994/20,20/+	0.984645	V	1331895	1331914	6	GCCGAAAATGACGTTATGCC	1331975	1331994	11	GCATATGCCGTTATGCCGTT	1331915	1331974	GAAAAGAAAAATGGACGGCATATCGGCATATGCCGATATGCCGAAAAAAAATTTTAGGCG	1331959	1331969	+	0	31
NIC262_X:7728993:G->A_0578	NIC262	CAGAGACCTCCCACTTCCTTGCGNNNNNNNNNNCTTCAGCTTCCCGATATCCGACGGTAGTGTGAAGTTCCCACTTGACA	X:7728927-7729026/17,23/+	0.984013	X	7728927	7728943	1	GAAGTTCCCACTTGACA	7729004	7729026	1	CAGAGACCTCCCACTTCCTTGCG	7728944	7729003	AGAAGATGCACTTGATCAAGACTATCACTGAGCAAATACAAGAAGTCGAGAACAACATCC	7728988	7728998	+	0	34
NIC265_I:2798111:G->A_0034	NIC265	CTTTTTGGGGTAAACTGTTTCCNNNNNNNNNNCTTCAGCTTCCCGATATCCGACGGTAGTGTTGGTGTGGGTTCGCCTTT	I:2798044-2798143/18,22/+	0.986127	I	2798044	2798061	1	TGGTGTGGGTTCGCCTTT	2798122	2798143	1	CTTTTTGGGGTAAACTGTTTCC	2798062	2798121	TTTATCGAAGTTTTAAATTCAACTCCAAAAATGAACACGTAAGATGTCGGCCACTAAAAA	2798106	2798116	+	0	33
NIC265_III:4655272:A->T_0908	NIC265	GTAAGGGGCACATTCTGCCNNNNNNNNNNCTTCAGCTTCCCGATATCCGACGGTAGTGTGCACAGAATGCATCAGTGGGC	III:4655202-4655301/21,19/+	0.987297	III	4655202	4655222	1	GCACAGAATGCATCAGTGGGC	4655283	4655301	1	GTAAGGGGCACATTCTGCC	4655223	4655282	ACAATAAACCCGAACCATCGAAGACAGGGCACAATGCCTAAATTACGAAAACGATAATTC	4655267	4655277	+	0	30
NIC265_IV:9592319:T->C_1022	NIC265	CCAGCCCGTCGTTTTGCCTGCAGNNNNNNNNNNCTTCAGCTTCCCGATATCCGACGGTAGTGTGAGCACAAATAACAACC	IV:9592253-9592352/17,23/+	0.983657	IV	9592253	9592269	1	GAGCACAAATAACAACC	9592330	9592352	1	CCAGCCCGTCGTTTTGCCTGCAG	9592270	9592329	GAATGAACCATATCAAATCCAGTTTTCAACTGAATTTTCACATCACAAGTGCTAAAATCT	9592314	9592324	+	0	34
NIC265_V:18883251:C->A_1202	NIC265	GCAGCGACCAAAAATTAGCAGCGCNNNNNNNNNNCTTCAGCTTCCCGATATCCGACGGTAGTGTAATTAGCAGCGCCCAG	V:18883187-18883286/16,24/+	0.995539	V	18883187	18883202	13	AATTAGCAGCGCCCAG	18883263	18883286	4	GCAGCGACCAAAAATTAGCAGCGC	18883203	18883262	AAAATTAGCAGCGCCCATAAAATTAGCAGCGCCCAAAAATTAGCAGCGCCCAAAAAATTA	18883246	18883256	+	0	36
NIC266_I:1355756:G->A_0019	NIC266	TCCCGTGCGGCAGTGTTGCNNNNNNNNNNCTTCAGCTTCCCGATATCCGACGGTAGTGTATAAAAAAAAAAAGACAAGTA	I:1355686-1355785/21,19/+	0.988914	I	1355686	1355706	1	ATAAAAAAAAAAAGACAAGTA	1355767	1355785	2	TCCCGTGCGGCAGTGTTGC	1355707	1355766	AAATCGAAACTTTATTGAAAAAATCCACAAGAAAAGCAGTTGAAAAGGGGCGGAGGCAAA	1355751	1355761	+	0	30
NIC266_III:6805834:G->A_0403	NIC266	ACAAGGACAGAAACAGACGNNNNNNNNNNCTTCAGCTTCCCGATATCCGACGGTAGTGTAGGCGGCGACGAAATGGCTGA	III:6805764-6805863/21,19/+	0.985223	III	6805764	6805784	1	AGGCGGCGACGAAATGGCTGA	6805845	6805863	1	ACAAGGACAGAAACAGACG	6805785	6805844	ATCTGCGAAAAGCACACTACAAATGGCTCAACAACAGAAAGCTCAACGAGAAAAAATGTT	6805829	6805839	+	0	30
NIC266_V:5816119:A->G_0572	NIC266	TTGATCTGCTACGTCAAATAGNNNNNNNNNNCTTCAGCTTCCCGATATCCGACGGTAGTGTCCGCGATCTACTTGGATTT	V:5816051-5816150/19,21/+	0.986472	V	5816051	5816069	1	CCGCGATCTACTTGGATTT	5816130	5816150	1	TTGATCTGCTACGTCAAATAG	5816070	5816129	AAGGTCAGTCACAAAATAATGAAAAACACATGACAACACAGAATCAGAAAACACGAAAAC	5816114	5816124	+	0	32
NIC266_X:1837854:T->G_0687	NIC266	AGCGCCAGGCGCGCTCGCCNNNNNNNNNNCTTCAGCTTCCCGATATCCGACGGTAGTGTCCAAAATGCCTTGAGCGTGTC	X:1837784-1837883/21,19/+	0.995785	X	1837784	1837804	1	CCAAAATGCCTTGAGCGTGTC	1837865	1837883	1	AGCGCCAGGCGCGCTCGCC	1837805	1837864	AAGCAAAAGAAATAAAAATTATTATCCCGAAGAAAAAATCGAACCACGGTCTTGTGAGGG	1837849	1837859	+	0	30
NIC268_I:3173368:G->T_0310	NIC268	GAGCCGCCTCAACAAGTGGNNNNNNNNNNCTTCAGCTTCCCGATATCCGACGGTAGTGTAACAATTGGGTAACACAACAA	I:3173298-3173397/21,19/+	0.994687	I	3173298	3173318	1	AACAATTGGGTAACACAACAA	3173379	3173397	1	GAGCCGCCTCAACAAGTGG	3173319	3173378	AAAACAACGAACGAGGAAAAAAAAAACCAAAAAAAAAAAATTATTCGATGGCATTCTCCG	3173360	3173373	+	0	30
NIC268_III:981275:G->T_1672	NIC268	GACGGAAAATGAGACATTCNNNNNNNNNNCTTCAGCTTCCCGATATCCGACGGTAGTGTTAGGCTTAGGCTGGGCGGGGG	III:981246-981345/21,19/-	0.998955	III	981325	981345	1	TAGGCTTAGGCTGGGCGGGGG	981246	981264	1	GACGGAAAATGAGACATTC	981265	981324	AGAGAAAAAAAAAATGTAAATCCCAAAAAATTCAAGAATTCAGAAAAAGCAGAAAAAAAA	981270	981280	-	0	30
NIC268_IV:2243367:G->A_2925	NIC268	AAAAGCAACAGCAACCACTGGTGNNNNNNNNNNCTTCAGCTTCCCGATATCCGACGGTAGTGTGAGTTGGTCAAGTCGGA	IV:2243301-2243400/17,23/+	0.997351	IV	2243301	2243317	2	GAGTTGGTCAAGTCGGA	2243378	2243400	1	AAAAGCAACAGCAACCACTGGTG	2243318	2243377	GAATCGGGAGAAAGCCAAAAGTACAAAGAAGAAAGAAAAGGTCAAGTCAGAGAAAATGAA	2243362	2243372	+	0	34
NIC268_V:16272328:A->G_6101	NIC268	GGAGGAAATCGTGCCACAAGNNNNNNNNNNCTTCAGCTTCCCGATATCCGACGGTAGTGTGAAAAGAAGGAAGATGATGA	V:16272259-16272358/20,20/+	0.998028	V	16272259	16272278	1	GAAAAGAAGGAAGATGATGA	16272339	16272358	1	GGAGGAAATCGTGCCACAAG	16272279	16272338	AAACAAAGAGGATAATGAAAAGAAAAAAGAAGAGAAGAAGGAGGACGAGAAGCCCAAGAA	16272323	16272333	+	0	31
NIC271_II:2168874:T->G_0096	NIC271	GGGTGAGCAACCCTGGATCTAGNNNNNNNNNNCTTCAGCTTCCCGATATCCGACGGTAGTGTGATGGAGCAAAGGGGAGA	II:2168807-2168906/18,22/+	0.98339	II	2168807	2168824	1	GATGGAGCAAAGGGGAGA	2168885	2168906	1	GGGTGAGCAACCCTGGATCTAG	2168825	2168884	GAAAAGAGTTTCAGACAAAGAGGGCTAGGACTGAAAGAGGTCAGATCTATTGAGCAGGTG	2168865	2168879	+	0	33
NIC271_IV:1057576:G->T_0177	NIC271	GCTAGAAATAGGGGGAAATAGGANNNNNNNNNNCTTCAGCTTCCCGATATCCGACGGTAGTGTTGCGGCAAAAAGATTGT	IV:1057543-1057642/17,23/-	0.980436	IV	1057626	1057642	1	TGCGGCAAAAAGATTGT	1057543	1057565	1	GCTAGAAATAGGGGGAAATAGGA	1057566	1057625	AAAACTGAAAAAAAAAATCGTTTTTTCAACAAAAAACAAGGAAGATCGACACAAAAACTA	1057571	1057581	-	0	34
NIC271_V:15537258:A->T_0278	NIC271	CGTAAATCGACATCCGTGCNNNNNNNNNNCTTCAGCTTCCCGATATCCGACGGTAGTGTACTGTAGCGCTGGTCCGATTC	V:15537188-15537287/21,19/+	0.993609	V	15537188	15537208	1	ACTGTAGCGCTGGTCCGATTC	15537269	15537287	1	CGTAAATCGACATCCGTGC	15537209	15537268	TGAAAATCAAAAAAAACTTCCGAATTTTCCGAGAAATGTTTCCGAAAATAAAAAAAAGCC	15537253	15537263	+	0	30
NIC271_X:11104026:T->C_0355	NIC271	TCCGGCGCAATTCGCGTATCNNNNNNNNNNCTTCAGCTTCCCGATATCCGACGGTAGTGTTCAAAGCTAAGAGGAAAGGA	X:11103957-11104056/20,20/+	0.984654	X	11103957	11103976	1	TCAAAGCTAAGAGGAAAGGA	11104037	11104056	1	TCCGGCGCAATTCGCGTATC	11103977	11104036	AACATTTGTCGTCAAATATTTAAAAATGATAGTCAGAAGTCAAAAAAAGTAACTGATTCA	11104021	11104031	+	0	31
NIC3_I:10683375:G->A_0071	NIC3	ATCGGACCTTTGGTGGAACCNNNNNNNNNNCTTCAGCTTCCCGATATCCGACGGTAGTGTAAATTTCACACAAAAGAAAA	I:10683306-10683405/20,20/+	0.980963	I	10683306	10683325	1	AAATTTCACACAAAAGAAAA	10683386	10683405	1	ATCGGACCTTTGGTGGAACC	10683326	10683385	AAACATACAGCTCGAACACAATTATGTGAACAAAGAAGAACAAAACAACGAATTAATACG	10683370	10683380	+	0	31
NIC3_II:4040840:T->C_0649	NIC3	ATCCGTCGGTTCCACACGCNNNNNNNNNNCTTCAGCTTCCCGATATCCGACGGTAGTGTCGTAAATCGACACAAGGTCAA	II:4040770-4040869/21,19/+	0.985375	II	4040770	4040790	1	CGTAAATCGACACAAGGTCAA	4040851	4040869	1	ATCCGTCGGTTCCACACGC	4040791	4040850	AAAATATAAATATTCCAGCAAAGCTATTTCCAGATGCGATAAAAGCCTATCAGGCGGCGT	4040835	4040845	+	0	30
NIC3_III:4243615:A->G_0884	NIC3	CAGAGACTCGAACTCTTTTNNNNNNNNNNCTTCAGCTTCCCGATATCCGACGGTAGTGTCAGCGACTGGAGAGCATCTGG	III:4243545-4243644/21,19/+	0.986782	III	4243545	4243565	1	CAGCGACTGGAGAGCATCTGG	4243626	4243644	1	CAGAGACTCGAACTCTTTT	4243566	4243625	AAATGGTAAAAAAATAAAACCAAACTGGGAAATTCTAATAGAAACACATATAAAATATTA	4243610	4243620	+	0	30
NIC3_IV:7130827:G->A_1075	NIC3	TACCGCCTCCTCCTCCACCNNNNNNNNNNCTTCAGCTTCCCGATATCCGACGGTAGTGTCCGCCTCCTCCTCCTGAAATT	IV:7130757-7130856/21,19/+	0.986921	IV	7130757	7130777	1	CCGCCTCCTCCTCCTGAAATT	7130838	7130856	1	TACCGCCTCCTCCTCCACC	7130778	7130837	AGAATAGTTTAGCCAAAGTTCTGTGGATGAAATTCTTAAACAAACCTCCGCCTCCACCTC	7130822	7130832	+	0	30
NIC501_I:996739:G->A_0013	NIC501	TTTTCTAGGCCAGGGGCCCCCNNNNNNNNNNCTTCAGCTTCCCGATATCCGACGGTAGTGTGGGTTTACGGAGTGGCCGA	I:996671-996770/19,21/+	0.98289	I	996671	996689	1	GGGTTTACGGAGTGGCCGA	996750	996770	1	TTTTCTAGGCCAGGGGCCCCC	996690	996749	AAATTTACAGAGACATTGCCCTGACTATCTGACTGTTTTTTTAGCGAAAGAACTTTCATA	996734	996744	+	0	32
NIC501_II:771763:C->T_0067	NIC501	GTGTGCTCCGCGAGCGAAANNNNNNNNNNCTTCAGCTTCCCGATATCCGACGGTAGTGTTTCTCTACCCTGCAAGCTTGT	II:771693-771792/21,19/+	0.984954	II	771693	771713	1	TTCTCTACCCTGCAAGCTTGT	771774	771792	1	GTGTGCTCCGCGAGCGAAA	771714	771773	GCTCCGCGAGCAAACTATTAAATTTTTCAAAAACAGGCTTTAAAAAAATCTCAAAAAAGT	771758	771768	+	0	30
NIC501_IV:5751338:G->T_0240	NIC501	ATTTCGCATAGAGCTCAGGAGGNNNNNNNNNNCTTCAGCTTCCCGATATCCGACGGTAGTGTGCTGACAAAAGGTCAAAA	IV:5751271-5751370/18,22/+	0.981807	IV	5751271	5751288	1	GCTGACAAAAGGTCAAAA	5751349	5751370	1	ATTTCGCATAGAGCTCAGGAGG	5751289	5751348	AGAAGCGATGCAAAATAAAGGACAGAGAGCAAGAAGAAGAAGAGCTTATGTTGTTCTCAA	5751333	5751343	+	0	33
NIC501_V:7186913:T->A_0640	NIC501	AAAGCGCTCTATGGCGAAANNNNNNNNNNCTTCAGCTTCCCGATATCCGACGGTAGTGTATTTGTGAACTTGGGGGGGAG	V:7186843-7186942/21,19/+	0.981184	V	7186843	7186863	1	ATTTGTGAACTTGGGGGGGAG	7186924	7186942	1	AAAGCGCTCTATGGCGAAA	7186864	7186923	GTGCTGATTATCGATAACCTCTAATAATTAAACACTCCCAAATGAAAAATTACTATTTAG	7186908	7186918	+	0	30
NIC523_I:9329936:G->A_0079	NIC523	GTTCTTTGGTAAGCAGTTTCTGAGNNNNNNNNNNCTTCAGCTTCCCGATATCCGACGGTAGTGTGTGATTGCTGGAGTTG	I:9329871-9329970/16,24/+	0.98565	I	9329871	9329886	1	GTGATTGCTGGAGTTG	9329947	9329970	1	GTTCTTTGGTAAGCAGTTTCTGAG	9329887	9329946	TTACAGTATCATCTTATGATAATTGGAAAAAACTTAAACTTCAACAATTGACGACTGGAA	9329931	9329941	+	0	35
NIC523_II:3632053:A->T,C_0353	NIC523	AGGACGACAAACTCAAGGAATTGNNNNNNNNNNCTTCAGCTTCCCGATATCCGACGGTAGTGTAACCGACGAAGCAGCGA	II:3631987-3632086/17,23/+	0.984713	II	3631987	3632003	1	AACCGACGAAGCAGCGA	3632064	3632086	1	AGGACGACAAACTCAAGGAATTG	3632004	3632063	AACAAAGTGCAGCAGCACAGGAAGAACAAATTGAGAAGCTCGCGGAGCAAGGAAGGAAAA	3632048	3632058	+	0	34
NIC523_III:6373316:C->T_0465	NIC523	GAAAAGAGAAACGGTTGGAGNNNNNNNNNNCTTCAGCTTCCCGATATCCGACGGTAGTGTGAAAGAATCTCCGAAGGACA	III:6373247-6373346/20,20/+	0.987359	III	6373247	6373266	1	GAAAGAATCTCCGAAGGACA	6373327	6373346	1	GAAAAGAGAAACGGTTGGAG	6373267	6373326	CAGAATCTGAAAAAGGAGAAGGTAAGAAAAGAAGAGAACGATCGAAAGACAAAGAAACAG	6373311	6373321	+	0	31
NIC523_IV:1672445:A->T_0546	NIC523	GCTCTCTTTTTCCACTCTCNNNNNNNNNNCTTCAGCTTCCCGATATCCGACGGTAGTGTCCCCTTTTCCTTCTCTCTTCT	IV:1672375-1672474/21,19/+	0.986072	IV	1672375	1672395	1	CCCCTTTTCCTTCTCTCTTCT	1672456	1672474	1	GCTCTCTTTTTCCACTCTC	1672396	1672455	ATTGGCTTCTGCTCGTGCTTTTTGCTCTTCTGTCTGTCTTTTAAAGCCAATTCCTCTTTT	1672440	1672450	+	0	30
NIC526_I:10925254:T->A_0094	NIC526	TTGTGAATACTACAAAAGCTCCGNNNNNNNNNNCTTCAGCTTCCCGATATCCGACGGTAGTGTTGGTGTTTTTCAGGGGG	I:10925188-10925287/17,23/+	0.986495	I	10925188	10925204	1	TGGTGTTTTTCAGGGGG	10925265	10925287	1	TTGTGAATACTACAAAAGCTCCG	10925205	10925264	ATGAGTAAATCTTGAAGAAACTCTGTAAATCTACAAAAGGCTCCGTAAATCTACAATAAA	10925249	10925259	+	0	34
NIC526_III:6091436:G->A_0324	NIC526	AGGGGAGAGACTGCTTTGTNNNNNNNNNNCTTCAGCTTCCCGATATCCGACGGTAGTGTAAAGAAAGGACGAGAGGAAGA	III:6091366-6091465/21,19/+	0.994638	III	6091366	6091386	1	AAAGAAAGGACGAGAGGAAGA	6091447	6091465	1	AGGGGAGAGACTGCTTTGT	6091387	6091446	AGAAGGTGGAAAAAGAAAAGAAGACAAATAATAAAAACGATTCTTGAAAGACGATGTTGA	6091431	6091441	+	0	30
NIC526_IV:4015508:C->T_0953	NIC526	CGCAGGGGGGTCGTGTCCCNNNNNNNNNNCTTCAGCTTCCCGATATCCGACGGTAGTGTAGGAAAAAAAATCAGATTTTA	IV:4015438-4015537/21,19/+	0.985658	IV	4015438	4015458	1	AGGAAAAAAAATCAGATTTTA	4015519	4015537	1	CGCAGGGGGGTCGTGTCCC	4015459	4015518	TACACAAACAGAAAAAAAAGAAAAGAAGAAGAATCGAATTGAGTGGAGACATCTAGACGC	4015503	4015513	+	0	30
NIC526_V:15578221:C->A_1167	NIC526	TGGCTCATCAAATTCCTCGGCNNNNNNNNNNCTTCAGCTTCCCGATATCCGACGGTAGTGTCGGCACTGCAAATTGACTG	V:15578153-15578252/19,21/+	0.98271	V	15578153	15578171	1	CGGCACTGCAAATTGACTG	15578232	15578252	1	TGGCTCATCAAATTCCTCGGC	15578172	15578231	AAAAATATGTAAAAAATAGAAAAAAACTGTTGAAAAATAAATTCTTACTCTCTTTCTGCA	15578216	15578226	+	0	32
NIC527_I:1958596:G->T_0060	NIC527	CAAGGCCGCCGCACACCGTTGCGNNNNNNNNNNCTTCAGCTTCCCGATATCCGACGGTAGTGTCCGACGAAAAATCGAGA	I:1958560-1958659/17,23/-	0.982282	I	1958643	1958659	1	CCGACGAAAAATCGAGA	1958560	1958582	1	CAAGGCCGCCGCACACCGTTGCG	1958583	1958642	AAATCAATTTAAAAGCGCTAAAATCGATGAGATTTTTTCTCCAGGCCCCGCCCCCAACTG	1958591	1958601	-	0	37
NIC527_II:15130732:G->A_0346	NIC527	AGCTGTTGTTCAAGAGCTATGAGNNNNNNNNNNCTTCAGCTTCCCGATATCCGACGGTAGTGTGTGGGAAAGTGGAGGTC	II:15130666-15130765/17,23/+	0.982279	II	15130666	15130682	1	GTGGGAAAGTGGAGGTC	15130743	15130765	1	AGCTGTTGTTCAAGAGCTATGAG	15130683	15130742	AAAAGTGCTGCAAAACGGGACAGATGTAGTTGTAGTCTATCGTTTATAAGGAAACAGTAC	15130727	15130737	+	0	34
NIC527_III:12663742:A->G_0503	NIC527	AAGCGAGAAAAAGCAGAGGCNNNNNNNNNNCTTCAGCTTCCCGATATCCGACGGTAGTGTACTTGATGAGACGCTTGATG	III:12663673-12663772/20,20/+	0.986898	III	12663673	12663692	1	ACTTGATGAGACGCTTGATG	12663753	12663772	1	AAGCGAGAAAAAGCAGAGGC	12663693	12663752	AAATGGAAAAAAAAGTATTTCTAGTGAGCAAAAAAAAAAGGAAAAAAGCACATCCTTGTA	12663737	12663747	+	0	31
NIC527_X:13209174:A->G_0927	NIC527	GAGAGTATGCAAAATTCCGCAACNNNNNNNNNNCTTCAGCTTCCCGATATCCGACGGTAGTGTGGAAAACGGGGGAGAAA	X:13209108-13209207/17,23/+	0.987117	X	13209108	13209124	1	GGAAAACGGGGGAGAAA	13209185	13209207	1	GAGAGTATGCAAAATTCCGCAAC	13209125	13209184	ACTCCACAGCTCAGTGAGAAAACTGGAAAAAAGCGTAAGAAATTGAGAGAGGAAGGGAGA	13209169	13209179	+	0	34
NIC528_I:2704295:G->A_0039	NIC528	GATAATAGACTCCGCCCCTATCNNNNNNNNNNCTTCAGCTTCCCGATATCCGACGGTAGTGTTAGGCCACCTAGCAAGTT	I:2704228-2704327/18,22/+	0.985238	I	2704228	2704245	1	TAGGCCACCTAGCAAGTT	2704306	2704327	1	GATAATAGACTCCGCCCCTATC	2704246	2704305	TCTGTGACAGTCCAAACAGTCCAAATCAAAGAAAATTTAAAGTAAATTTGAAAAAAAATC	2704290	2704300	+	0	33
NIC528_II:3724861:A->T_0162	NIC528	AAGCAGGCATAGTCACGTCTGTAGNNNNNNNNNNCTTCAGCTTCCCGATATCCGACGGTAGTGTGAGACAGACGTAGGCA	II:3724796-3724895/16,24/+	0.981959	II	3724796	3724811	1	GAGACAGACGTAGGCA	3724872	3724895	1	AAGCAGGCATAGTCACGTCTGTAG	3724812	3724871	CGCATTAGCCAATACTCACATATACAAGTGTATAGGTAGATTAGTAAGGAGAGAGGCAAG	3724856	3724866	+	0	35
NIC528_III:12090503:A->T_0412	NIC528	GTCGTGTCGTCAAGTGTGCNNNNNNNNNNCTTCAGCTTCCCGATATCCGACGGTAGTGTCGGTAGTTGTTGGAGAGCAAG	III:12090433-12090532/21,19/+	0.99165	III	12090433	12090453	1	CGGTAGTTGTTGGAGAGCAAG	12090514	12090532	1	GTCGTGTCGTCAAGTGTGC	12090454	12090513	CACACACACATGACATTGTCGAAAAGGTAAGAGAATGAAGAAGAGAAGGAAAGGTTTATT	12090498	12090508	+	0	30
NIC528_IV:875241:A->T_0433	NIC528	GTTCAGGCAAAACCGGCGCNNNNNNNNNNCTTCAGCTTCCCGATATCCGACGGTAGTGTGGAGGAGCCGATGCACTAATT	IV:875171-875270/21,19/+	0.988765	IV	875171	875191	1	GGAGGAGCCGATGCACTAATT	875252	875270	1	GTTCAGGCAAAACCGGCGC	875192	875251	GTAAAGCGAAAAATCTTTGAAAATCCTAAAATTTCGTTAATTTCCAGGCAGCCGAGACGG	875236	875246	+	0	30
PB306_I:12851348:G->C_0291	PB306	GAACCTGTCATGTTGAAACCGGCNNNNNNNNNNCTTCAGCTTCCCGATATCCGACGGTAGTGTCGAGTGCCGAGGAGCGT	I:12851282-12851381/17,23/+	0.984969	I	12851282	12851298	1	CGAGTGCCGAGGAGCGT	12851359	12851381	1	GAACCTGTCATGTTGAAACCGGC	12851299	12851358	GAAAAGAAAAAGGAAAGACGTAAATCGATGCCCCTTCAACAGACCGCCCGTGATCAACAG	12851343	12851353	+	0	34
PB306_III:728665:T->A_0392	PB306	CCTGAGGTGACGCGGTATNNNNNNNNNNCTTCAGCTTCCCGATATCCGACGGTAGTGTGCACGAAACCATGGAAATTCAA	III:728632-728731/22,18/-	0.991609	III	728710	728731	1	GCACGAAACCATGGAAATTCAA	728632	728649	1	CCTGAGGTGACGCGGTAT	728650	728709	AAAATAAATACGTTTTATAGAAGTGAAAATAAACAAATTTACTTAAAAAAAAAAAAAGCG	728660	728670	-	0	34
PB306_V:215642:T->A_0783	PB306	ATGGGTCATTCCAAAGTCGNNNNNNNNNNCTTCAGCTTCCCGATATCCGACGGTAGTGTTTGGGCGGGGCTAGGAAGAAA	V:215572-215671/21,19/+	0.998194	V	215572	215592	1	TTGGGCGGGGCTAGGAAGAAA	215653	215671	1	ATGGGTCATTCCAAAGTCG	215593	215652	AAAAAAGAAAAAGAGAAATTTCAAAAAAATCCAGAATAATAAACAAGAATAATCAATAAA	215637	215647	+	0	30
PB306_X:7292254:G->A_3184	PB306	CAGAGCTGACGGCTGCTCANNNNNNNNNNCTTCAGCTTCCCGATATCCGACGGTAGTGTCTTTCGCGTATAATCCAGTCA	X:7292184-7292283/21,19/+	0.993425	X	7292184	7292204	1	CTTTCGCGTATAATCCAGTCA	7292265	7292283	1	CAGAGCTGACGGCTGCTCA	7292205	7292264	AATCAAACGATAAGGATAAAGCTCTAGCCGACAATAGCAAAAAAGTAAAGGTCAAAAAGG	7292249	7292259	+	0	30
PS2025_I:5273967:C->T_0025	PS2025	GCCGGGGCGGATGTATCAGNNNNNNNNNNCTTCAGCTTCCCGATATCCGACGGTAGTGTCGGCTGGCGCAGTAGGAACTG	I:5273897-5273996/21,19/+	0.991575	I	5273897	5273917	1	CGGCTGGCGCAGTAGGAACTG	5273978	5273996	1	GCCGGGGCGGATGTATCAG	5273918	5273977	AAAATTCGTCATTAAAATTTTATTTGTATCATGGTTTCAGACAACTAACCATGGAAGATA	5273962	5273972	+	0	30
PS2025_II:14240702:A->T_0102	PS2025	CGTGTCCTCTAAAATTGTGCCCAGNNNNNNNNNNCTTCAGCTTCCCGATATCCGACGGTAGTGTCGGCGTGCCAGGGAAA	II:14240638-14240737/16,24/+	0.980433	II	14240638	14240653	1	CGGCGTGCCAGGGAAA	14240714	14240737	1	CGTGTCCTCTAAAATTGTGCCCAG	14240654	14240713	AGTGGTTTTATACATTCCAAAATATAGATATACTGTATTAACACCCTTAATCTCGTAATT	14240697	14240707	+	0	36
PS2025_V:470556:C->T_0189	PS2025	GGGGGAGGTGGGTGTGTGTNNNNNNNNNNCTTCAGCTTCCCGATATCCGACGGTAGTGTAGTTTGAAAAAAGAGCAAGAC	V:470486-470585/21,19/+	0.991569	V	470486	470506	1	AGTTTGAAAAAAGAGCAAGAC	470567	470585	5	GGGGGAGGTGGGTGTGTGT	470507	470566	TGACGGAGATTTGACCGAAACAATGGTGAAAAACTGACCGAAAACACTCCAAATGTGAAA	470551	470561	+	0	30
PS2025_X:3374865:G->A_0334	PS2025	AGGAGCACGGAGAGTGCGAGTNNNNNNNNNNCTTCAGCTTCCCGATATCCGACGGTAGTGTATTCAGAAAAGAACAAGGT	X:3374797-3374896/19,21/+	0.983352	X	3374797	3374815	1	ATTCAGAAAAGAACAAGGT	3374876	3374896	1	AGGAGCACGGAGAGTGCGAGT	3374816	3374875	AGCGTAATTAAACTAAAAGAAGCAGAAGTGCAGTGAATATAAAAGAAGGGGAGGATAAGG	3374860	3374870	+	0	32
QG2075_II:13023115:C->T_0341	QG2075	CGCCTCCTGCTGCGCTGAAGNNNNNNNNNNCTTCAGCTTCCCGATATCCGACGGTAGTGTAAACACAAATCAGTGAACAC	II:13023046-13023145/20,20/+	0.993801	II	13023046	13023065	1	AAACACAAATCAGTGAACAC	13023126	13023145	1	CGCCTCCTGCTGCGCTGAAG	13023066	13023125	TCACGAAAAGAGATAACTGAAGTCTGCAAAAAAGAGAAAAAAGAAGAAGCTTATTTGCAT	13023110	13023120	+	0	31
QG2075_III:3339861:G->A_0603	QG2075	CCGCTGACGGCCGCGCAAANNNNNNNNNNCTTCAGCTTCCCGATATCCGACGGTAGTGTAGGGACAGAGACAGAGAGAGA	III:3339791-3339890/21,19/+	0.995134	III	3339791	3339811	1	AGGGACAGAGACAGAGAGAGA	3339872	3339890	1	CCGCTGACGGCCGCGCAAA	3339812	3339871	ACGGAAACAAATCTGATAAGATAAGCGACTGAACAAATAGCATGGAAATGTTACGCGCGC	3339856	3339866	+	0	30
QG2075_V:9402546:G->C_1072	QG2075	ACGGTACTCGGTCTCGAAACGGNNNNNNNNNNCTTCAGCTTCCCGATATCCGACGGTAGTGTGTATTTTCGTAGCCCGGT	V:9402479-9402578/18,22/+	0.99529	V	9402479	9402496	1	GTATTTTCGTAGCCCGGT	9402557	9402578	1	ACGGTACTCGGTCTCGAAACGG	9402497	9402556	AGCAAGATATGAATTTATTAACATTACACAAACACGAAAAAATACGGTTGCGAAAAAAAT	9402541	9402551	+	0	33
QG2075_X:11406264:G->T_1683	QG2075	CCACATTTTTTGGCTTGGTNNNNNNNNNNCTTCAGCTTCCCGATATCCGACGGTAGTGTTGGCAGAAAAGCGCAAGAAAA	X:11406194-11406293/21,19/+	0.995759	X	11406194	11406214	1	TGGCAGAAAAGCGCAAGAAAA	11406275	11406293	1	CCACATTTTTTGGCTTGGT	11406215	11406274	GATAAAGAAAAAGAAAGCAAAAAAAAATGAACAGAAAATGACAAATTGAGAAAAACGACA	11406259	11406269	+	0	30
QG556_I:9482067:G->A_0167	QG556	CTGTCAAGAAGTCGTCCAAGNNNNNNNNNNCTTCAGCTTCCCGATATCCGACGGTAGTGTGAAAAAGGATGAAAAGGAAG	I:9481998-9482097/20,20/+	0.993865	I	9481998	9482017	2	GAAAAAGGATGAAAAGGAAG	9482078	9482097	1	CTGTCAAGAAGTCGTCCAAG	9482018	9482077	AAGAAAAGAAGGATGAAAAAAAGGAAACTTCAAAAAAATCGAAAAAGGCGTCGAAGAAGT	9482062	9482072	+	0	31
QG556_II:1831610:A->G_0478	QG556	GACTGGATTTGAAGAGCGGCNNNNNNNNNNCTTCAGCTTCCCGATATCCGACGGTAGTGTATCAGATGGGATGACATGGA	II:1831541-1831640/20,20/+	0.985914	II	1831541	1831560	1	ATCAGATGGGATGACATGGA	1831621	1831640	1	GACTGGATTTGAAGAGCGGC	1831561	1831620	GAGAAAGTATGCGATCAACGACAGTATCATAATTGAAGCTCGAGTCAAAATTATAAAAAT	1831583	1831615	+	0	31
QG556_III:5846768:G->A_0765	QG556	AAGAGGAGCCGTCGCCGTGNNNNNNNNNNCTTCAGCTTCCCGATATCCGACGGTAGTGTTAGCCTGAATTTGCTCGAAAT	III:5846698-5846797/21,19/+	0.983367	III	5846698	5846718	1	TAGCCTGAATTTGCTCGAAAT	5846779	5846797	1	AAGAGGAGCCGTCGCCGTG	5846719	5846778	GTGGAGGGGAAACGGGAAAAAAGAAGAAGCTGAAGAAAGAGGCCAACCAGGAGGAAAAAG	5846763	5846773	+	0	30
QG556_V:14482460:C->A_1014	QG556	TGCTCGGCGAGCCCATCTTNNNNNNNNNNCTTCAGCTTCCCGATATCCGACGGTAGTGTGGAAAGATAGTTGAGCAGGAG	V:14482390-14482489/21,19/+	0.997341	V	14482390	14482410	1	GGAAAGATAGTTGAGCAGGAG	14482471	14482489	1	TGCTCGGCGAGCCCATCTT	14482411	14482470	GAGCAAGAAGAAAATGAAAATAAGCAGAGAAATGAGGAAGGCACTGAAACAACTACTTCA	14482455	14482465	+	0	30
QW947_I:2764624:A->G_0031	QW947	TTATCGCTGTCACACAGCTCNNNNNNNNNNCTTCAGCTTCCCGATATCCGACGGTAGTGTCTTTTCGAGCTGTGACAGTG	I:2764555-2764654/20,20/+	0.994286	I	2764555	2764574	1	CTTTTCGAGCTGTGACAGTG	2764635	2764654	1	TTATCGCTGTCACACAGCTC	2764575	2764634	GTAATCCATTTAGAATATTAAAATTAAGCAAAACCTGAGAAAATAATGAAGAAAAATGGA	2764619	2764629	+	0	31
QW947_II:10076961:G->A_0179	QW947	TGGAGGTCTTTGGAAAGCANNNNNNNNNNCTTCAGCTTCCCGATATCCGACGGTAGTGTAGGGGCGGCGATGTGGGTTTT	II:10076891-10076990/21,19/+	0.988737	II	10076891	10076911	1	AGGGGCGGCGATGTGGGTTTT	10076972	10076990	1	TGGAGGTCTTTGGAAAGCA	10076912	10076971	TGAAATTTTGAAAACGAGTGAGAATGAATACCTACACAATTTTGAAAAGGTTTATAAAAT	10076956	10076966	+	0	30
QW947_III:8588601:A->T_0344	QW947	ACATTGTGAATGTGTCAGATTGGGNNNNNNNNNNCTTCAGCTTCCCGATATCCGACGGTAGTGTGGATATGGTTGAACTA	III:8588536-8588635/16,24/+	0.983259	III	8588536	8588551	1	GGATATGGTTGAACTA	8588612	8588635	1	ACATTGTGAATGTGTCAGATTGGG	8588552	8588611	CAGTTAAGTTGAAAACAGTGAATAGAACACCGAACATGTTCAAAAAAGAAAACGAAGAAA	8588596	8588606	+	0	35
QW947_V:20143320:C->A_0914	QW947	CTACACAGTGCGTTTTGTTTAGCGNNNNNNNNNNCTTCAGCTTCCCGATATCCGACGGTAGTGTAGAAAAACGGCGAAAA	V:20143255-20143354/16,24/+	0.983772	V	20143255	20143270	1	AGAAAAACGGCGAAAA	20143331	20143354	1	CTACACAGTGCGTTTTGTTTAGCG	20143271	20143330	ACCGTGAAATCGGAAGGAAATTAAATAATTAAATCCTGGCAAAAGATATCTCCCGTAAAT	20143314	20143325	+	0	35
QX1211_I:1493658:G->T_0246	QX1211	GCAACGTGCCCACTGAAACNNNNNNNNNNCTTCAGCTTCCCGATATCCGACGGTAGTGTTCATGTAATGTGGGGTGACGG	I:1493588-1493687/21,19/+	0.997097	I	1493588	1493608	1	TCATGTAATGTGGGGTGACGG	1493669	1493687	1	GCAACGTGCCCACTGAAAC	1493609	1493668	CCGATGTAGAAAAATGCGGAAAAATATCAAAAAAAAATGCAGAAAAAGTGATTGCCCACT	1493653	1493663	+	0	30
QX1211_II:12688383:G->A_7945	QX1211	CTTCTCCCCTTTTTTGCTCNNNNNNNNNNCTTCAGCTTCCCGATATCCGACGGTAGTGTTCCTTATCTCCCCTGTTTTCC	II:12688313-12688412/21,19/+	0.996076	II	12688313	12688333	1	TCCTTATCTCCCCTGTTTTCC	12688394	12688412	1	CTTCTCCCCTTTTTTGCTC	12688334	12688393	AAGTAAAAACTTGGAGAAAAGTTGCTCTAAACGAGAGAAATAGAGGGAAGAAGCGAAGAG	12688378	12688388	+	0	30
QX1211_III:7161291:G->A_8933	QX1211	AGCGATCCTCGGTTTCAGATNNNNNNNNNNCTTCAGCTTCCCGATATCCGACGGTAGTGTAATAGTATGGAATGGGAAGA	III:7161222-7161321/20,20/+	0.996447	III	7161222	7161241	1	AATAGTATGGAATGGGAAGA	7161302	7161321	1	AGCGATCCTCGGTTTCAGAT	7161242	7161301	TGAAGAACAAAACAAAAGAAGAAAAAAAGTTGAAAAAATGTCTGAAAAAGAAAATAAAAA	7161286	7161296	+	0	31
QX1211_V:972161:C->T_10484	QX1211	TCAGTTTGCTCTCTCGATTTTTTCNNNNNNNNNNCTTCAGCTTCCCGATATCCGACGGTAGTGTCTTACACCGGGGCGCA	V:972096-972195/16,24/+	0.998211	V	972096	972111	1	CTTACACCGGGGCGCA	972172	972195	1	TCAGTTTGCTCTCTCGATTTTTTC	972112	972171	GAAAAAAAGAAAAAAAAAAGAAAGAAACGAGAGGAAAAAATATAAAGAGCCACTGATTTA	972156	972166	+	0	35
QX1212_I:13367217:G->A_0090	QX1212	TGCAAGCTTGCGGCGCCGANNNNNNNNNNCTTCAGCTTCCCGATATCCGACGGTAGTGTTTTCTGGGAAAAAATCTGGAA	I:13367147-13367246/21,19/+	0.987648	I	13367147	13367167	1	TTTCTGGGAAAAAATCTGGAA	13367228	13367246	1	TGCAAGCTTGCGGCGCCGA	13367168	13367227	AAAGCCGGAAATTATCAAAATTGTTCACTAAAATCGAAAAAAAAAAGAGGAACGTCATTT	13367212	13367222	+	0	30
QX1212_III:13757437:C->T_0418	QX1212	GCATTCTCAAGGAAAAGGAGGCGGNNNNNNNNNNCTTCAGCTTCCCGATATCCGACGGTAGTGTGATTCTGCCGACGGAA	III:13757372-13757471/16,24/+	0.982721	III	13757372	13757387	1	GATTCTGCCGACGGAA	13757448	13757471	1	GCATTCTCAAGGAAAAGGAGGCGG	13757388	13757447	GTGGAGGAAAATTGCTGAAAAGCAGCCCTAGCAAGAATCGAATAATTCGCAATTTTCTGG	13757432	13757442	+	0	35
QX1212_V:3230994:G->T_0503	QX1212	AGATTTCGCATGCGTTTGACNNNNNNNNNNCTTCAGCTTCCCGATATCCGACGGTAGTGTTGGTCGAGGGGATCGGTCTG	V:3230925-3231024/20,20/+	0.99467	V	3230925	3230944	1	TGGTCGAGGGGATCGGTCTG	3231005	3231024	1	AGATTTCGCATGCGTTTGAC	3230945	3231004	TCCACTATTTTTGAAAAGATAAATAATTAGAAGAGCAGCAAAAATTAGAGGAAAACCCAA	3230989	3230999	+	0	31
QX1212_X:8724308:G->T_3126	QX1212	ATCCAGGGACTTGGATTACACTCNNNNNNNNNNCTTCAGCTTCCCGATATCCGACGGTAGTGTCGGTGAGAGACAGAAAA	X:8724242-8724341/17,23/+	0.985583	X	8724242	8724258	1	CGGTGAGAGACAGAAAA	8724319	8724341	1	ATCCAGGGACTTGGATTACACTC	8724259	8724318	CAAAAAATGAGAAAAAGTTTAAGAACAGCGAGTTGTGTTCTAAGCAAGGGCTGACAGAAA	8724302	8724313	+	0	34
QX1791_I:4539333:A->G_0704	QX1791	TAGCGGCTCCTGGGGCTTCNNNNNNNNNNCTTCAGCTTCCCGATATCCGACGGTAGTGTGAGTGCGCGGAAATTGCCAGA	I:4539263-4539362/21,19/+	0.992004	I	4539263	4539283	1	GAGTGCGCGGAAATTGCCAGA	4539344	4539362	1	TAGCGGCTCCTGGGGCTTC	4539284	4539343	ATGCCCAAACCCTTAAGTTAAACATTTTAGTAAAAAATATGTAGTTAGGATTTTTGATAG	4539328	4539338	+	0	30
QX1791_II:2298913:A->C_2923	QX1791	ACAAGTGGCGCCTCTCGCTNNNNNNNNNNCTTCAGCTTCCCGATATCCGACGGTAGTGTCTGGACAATATTAGAAACGGT	II:2298843-2298942/21,19/+	0.998442	II	2298843	2298863	1	CTGGACAATATTAGAAACGGT	2298924	2298942	1	ACAAGTGGCGCCTCTCGCT	2298864	2298923	TTCACAGGAAAAAAAGAAAAAAGAAAAAATAAACGAACTGAAAGAAATAAAAATGCAACC	2298906	2298918	+	0	30
QX1791_III:1745381:C->T_6106	QX1791	GCACGGCTTCTTGGTGGTTNNNNNNNNNNCTTCAGCTTCCCGATATCCGACGGTAGTGTGAGAAACAAAGGGGGAGGGCG	III:1745311-1745410/21,19/+	0.998362	III	1745311	1745331	1	GAGAAACAAAGGGGGAGGGCG	1745392	1745410	1	GCACGGCTTCTTGGTGGTT	1745332	1745391	ACAAAAAACACAGAAAAGATGAGCAAAATGGGCGAAAAATGAAAAATTGCACCGACTTAC	1745376	1745386	+	0	30
QX1791_IV:418983:A->T_7248	QX1791	GAGCCGAAACCCCAGAGGANNNNNNNNNNCTTCAGCTTCCCGATATCCGACGGTAGTGTTAGGATGACGAAACGTTTGTC	IV:418913-419012/21,19/+	0.993096	IV	418913	418933	1	TAGGATGACGAAACGTTTGTC	418994	419012	1	GAGCCGAAACCCCAGAGGA	418934	418993	ACCTTTTCCCGGAAAAAATGATTTTCTTGCGGGAAAACACGAAAAAAAAAAATAAAATTC	418978	418988	+	0	30
QX1792_I:8420710:T->A_0096	QX1792	ATCGGCGATCGCCGATCGCCGTNNNNNNNNNNCTTCAGCTTCCCGATATCCGACGGTAGTGTGGAGTAGCGTAAATGGGG	I:8420643-8420742/18,22/+	0.997615	I	8420643	8420660	2	GGAGTAGCGTAAATGGGG	8420721	8420742	1	ATCGGCGATCGCCGATCGCCGT	8420661	8420720	ATTTCGATTCAAAATCCAAATTTGTCAATAAAATCGCCGAAGACAAAAATATTAACGGTA	8420705	8420715	+	0	33
QX1792_II:4322013:A->G_1082	QX1792	TCAGATGACACCCCAAAGCNNNNNNNNNNCTTCAGCTTCCCGATATCCGACGGTAGTGTAAGAAGCTGTCAAGGGCGAGG	II:4321943-4322042/21,19/+	0.992654	II	4321943	4321963	1	AAGAAGCTGTCAAGGGCGAGG	4322024	4322042	2	TCAGATGACACCCCAAAGC	4321964	4322023	AAAAACTAAGTTTCAGATAAAGAAAAATCCGATGGAGAAGAAGGCGATGAATTCAAGTCA	4321959	4322018	+	0	30
QX1792_III:1890559:C->T_2917	QX1792	CAAAATGGCGTTGCGGCGGNNNNNNNNNNCTTCAGCTTCCCGATATCCGACGGTAGTGTAAAACTCCAGAAAAATGCTGA	III:1890489-1890588/21,19/+	0.990683	III	1890489	1890509	1	AAAACTCCAGAAAAATGCTGA	1890570	1890588	1	CAAAATGGCGTTGCGGCGG	1890510	1890569	AAATCAAGAAGAAAAATTGAAAAAAGCAAAGGAAATATTGGCAAAACATCAGGTTTTAAC	1890554	1890564	+	0	30
QX1792_IV:16954874:G->A_5327	QX1792	CGCTCCGCCCATTTCCTGGNNNNNNNNNNCTTCAGCTTCCCGATATCCGACGGTAGTGTACCAGGAAATGGGCGGAGCCT	IV:16954804-16954903/21,19/+	0.995987	IV	16954804	16954824	5	ACCAGGAAATGGGCGGAGCCT	16954885	16954903	1	CGCTCCGCCCATTTCCTGG	16954825	16954884	AAATTTTCAAAAAAAAATGCCGAGAAACGGGCGGAGCCTAAATTTTGAAGAACAAATCTA	16954869	16954879	+	0	30
QX1793_I:2317202:T->A_0058	QX1793	AGATGCCAAGATGAAGCTCAATGNNNNNNNNNNCTTCAGCTTCCCGATATCCGACGGTAGTGTGCTGTGATGAGGTGGAG	I:2317136-2317235/17,23/+	0.990939	I	2317136	2317152	1	GCTGTGATGAGGTGGAG	2317213	2317235	1	AGATGCCAAGATGAAGCTCAATG	2317153	2317212	AAGCCGCCGGGTCACACGTATGTAAAAAATGTTCATAAATTTTAAAAAATTTTTTATTTC	2317197	2317207	+	0	34
QX1793_II:14427804:T->C_2011	QX1793	GTATTTCATGCTCTCCGGGNNNNNNNNNNCTTCAGCTTCCCGATATCCGACGGTAGTGTGTGGTCTTGAAACATGGTGAT	II:14427734-14427833/21,19/+	0.997998	II	14427734	14427754	1	GTGGTCTTGAAACATGGTGAT	14427815	14427833	1	GTATTTCATGCTCTCCGGG	14427755	14427814	CTAAATGGGAAAAAAAGCAAAAAAGGAAAAAAAGACAAGAGGAGAAAAGTCAAAAAGTGA	14427799	14427809	+	0	30
QX1793_III:3898860:A->G_2193	QX1793	TGGCTCGTTGCCAACAACTTATNNNNNNNNNNCTTCAGCTTCCCGATATCCGACGGTAGTGTGCTAGTGATTAAAACTTG	III:3898793-3898892/18,22/+	0.992845	III	3898793	3898810	1	GCTAGTGATTAAAACTTG	3898871	3898892	1	TGGCTCGTTGCCAACAACTTAT	3898811	3898870	AGAGAACAAAGAGTAAAAGAATCAGAAGTGAAAAAACAAAAATAAAAATAAAGAAAGTGT	3898855	3898865	+	0	33
QX1793_IV:14317301:A->T_3565	QX1793	TCGGCGATCGGCGATAGCCNNNNNNNNNNCTTCAGCTTCCCGATATCCGACGGTAGTGTAGATTTTCCGGTCGCCGATCG	IV:14317231-14317330/21,19/+	0.993208	IV	14317231	14317251	3	AGATTTTCCGGTCGCCGATCG	14317312	14317330	1	TCGGCGATCGGCGATAGCC	14317252	14317311	CCGAAGACAAAAATATTAACGGCAATCGGCATTCGCCGATCGCCGTGTTAAAAATTATTA	14317296	14317306	+	0	30
QX1794_II:3609977:A->C_1056	QX1794	GCAAGTGCCTGTCGGGACCCNNNNNNNNNNCTTCAGCTTCCCGATATCCGACGGTAGTGTAAAAAAATATCCGATAAAAA	II:3609908-3610007/20,20/+	0.991252	II	3609908	3609927	1	AAAAAAATATCCGATAAAAA	3609988	3610007	1	GCAAGTGCCTGTCGGGACCC	3609928	3609987	CATGGAAACGAAAAATAAAGAAGGACGCAGAGAACGCAAGAATCATAAAAATAAAAGTGA	3609972	3609982	+	0	31
QX1794_III:6442022:C->G_2147	QX1794	CGAGATTGGGCGCATCCCGNNNNNNNNNNCTTCAGCTTCCCGATATCCGACGGTAGTGTTATGCATGGGAAAGTGTGGAG	III:6441952-6442051/21,19/+	0.989605	III	6441952	6441972	1	TATGCATGGGAAAGTGTGGAG	6442033	6442051	1	CGAGATTGGGCGCATCCCG	6441973	6442032	AAAATAAGAATAAAACTGGATTCGCGGTAGGCTATGATGATATCTGAACCGGGAAGTTTT	6442017	6442027	+	0	30
QX1794_IV:14531808:C->T_3155	QX1794	CAGGGGGAGATGGCCGGATNNNNNNNNNNCTTCAGCTTCCCGATATCCGACGGTAGTGTTGCAGATTGTAAACGCTGAAG	IV:14531738-14531837/21,19/+	0.989675	IV	14531738	14531758	1	TGCAGATTGTAAACGCTGAAG	14531819	14531837	1	CAGGGGGAGATGGCCGGAT	14531759	14531818	AAAGAGAATCGAGAGAGAGAGCGACAGAAAGAAAGAAGGGAAGAAAGGACTGTAAACATG	14531803	14531813	+	0	30
QX1794_X:10377801:A->C_3903	QX1794	AAGAAGACTGCTGGCGCGTTTCNNNNNNNNNNCTTCAGCTTCCCGATATCCGACGGTAGTGTTGAAAACTGCTGGGCGGC	X:10377734-10377833/18,22/+	0.996009	X	10377734	10377751	1	TGAAAACTGCTGGGCGGC	10377812	10377833	1	AAGAAGACTGCTGGCGCGTTTC	10377752	10377811	GACAGCAGGAAACACTTGCAATATTACAATAAAAAGAACGGAAAACGAAAACTGCGTTAA	10377796	10377806	+	0	33
WN2001_II:1915462:G->C_0106	WN2001	CCGCCACGCACCCAAAAACNNNNNNNNNNCTTCAGCTTCCCGATATCCGACGGTAGTGTGACGGGGAATTCGAATTTTAT	II:1915433-1915532/21,19/-	0.987024	II	1915512	1915532	1	GACGGGGAATTCGAATTTTAT	1915433	1915451	1	CCGCCACGCACCCAAAAAC	1915452	1915511	AAAGAAAATGGTGAAAAACGATTGCGAGTACCGAAATTTAGAACTTGACCCGCGACGCGA	1915457	1915467	-	0	30
WN2001_III:1714868:A->C_0280	WN2001	AACTGGCGAAGGAAAAGCAGNNNNNNNNNNCTTCAGCTTCCCGATATCCGACGGTAGTGTAAACTTCCCTAAGGCGAAAG	III:1714799-1714898/20,20/+	0.982031	III	1714799	1714818	1	AAACTTCCCTAAGGCGAAAG	1714879	1714898	1	AACTGGCGAAGGAAAAGCAG	1714819	1714878	CAGTTTTGAAAATGGCTCGAATGAAGTCAGAAAAGGCAAAAAAGAAAGCAAAAAAGGCGA	1714863	1714873	+	0	31
WN2001_V:5142850:T->A_1227	WN2001	CTGTCTACCCGGGAGTTTGNNNNNNNNNNCTTCAGCTTCCCGATATCCGACGGTAGTGTGGGAAGAGTCTGTCAAATGGG	V:5142780-5142879/21,19/+	0.992709	V	5142780	5142800	1	GGGAAGAGTCTGTCAAATGGG	5142861	5142879	1	CTGTCTACCCGGGAGTTTG	5142801	5142860	GAAATTGGAAAACTAATTTAAAAAAATTAAACCTACCAAAATGGTATAATTCTCACTCTC	5142845	5142855	+	0	30
WN2001_X:9413829:A->C_1732	WN2001	CAAAGACGCAACCCCTTGTTGNNNNNNNNNNCTTCAGCTTCCCGATATCCGACGGTAGTGTACAAAGTTTCATAAACAAA	X:9413761-9413860/19,21/+	0.989011	X	9413761	9413779	1	ACAAAGTTTCATAAACAAA	9413840	9413860	1	CAAAGACGCAACCCCTTGTTG	9413780	9413839	ACAAAACAGAACAAAATCGTACAATCAAGAAAAATTAACAAAAAAAAACAAAAAAAACCA	9413824	9413834	+	0	32
XZ1513_I:1658407:T->A_0017	XZ1513	CCCAAAACCGGCAATCGCCNNNNNNNNNNCTTCAGCTTCCCGATATCCGACGGTAGTGTATTCCCAAAACCAGCAATTGC	I:1658337-1658436/21,19/+	0.98814	I	1658337	1658357	4	ATTCCCAAAACCAGCAATTGC	1658418	1658436	1	CCCAAAACCGGCAATCGCC	1658358	1658417	CGAAAATTCCCAAAACCGGCAATTGCCGAAAACTTCCAAAACCGGCAATTGCCGAAAATT	1658402	1658412	+	0	30
XZ1513_II:3924448:T->A_0587	XZ1513	ACAGTCGCTGATTCGCCGGANNNNNNNNNNCTTCAGCTTCCCGATATCCGACGGTAGTGTGGTGGTAGTAGTAGTAGTAG	II:3924379-3924478/20,20/+	0.990765	II	3924379	3924398	1	GGTGGTAGTAGTAGTAGTAG	3924459	3924478	1	ACAGTCGCTGATTCGCCGGA	3924399	3924458	TAGTAGGCTGCCGGCGGAGAATTTTTTGACTTTTTCAAACAAAAAAAAATTTAAAAACTT	3924443	3924453	+	0	31
XZ1513_V:19369709:C->G_2258	XZ1513	GCCTTTTGGCTGGAAGGGGGTTCNNNNNNNNNNCTTCAGCTTCCCGATATCCGACGGTAGTGTTTCACAGAAGTCTAAAT	V:19369643-19369742/17,23/+	0.985692	V	19369643	19369659	1	TTCACAGAAGTCTAAAT	19369720	19369742	1	GCCTTTTGGCTGGAAGGGGGTTC	19369660	19369719	AAAAAAATCAAAAAAAAAAACGAAAAAAATGTTCCTACCACAGCACGGACTCGAACCCCG	19369704	19369714	+	0	34
XZ1513_X:11024830:G->A_2766	XZ1513	ACCACTAGAACCACCCAAGNNNNNNNNNNCTTCAGCTTCCCGATATCCGACGGTAGTGTCCGCTCTTGAACCCTTTTCCT	X:11024760-11024859/21,19/+	0.994778	X	11024760	11024780	1	CCGCTCTTGAACCCTTTTCCT	11024841	11024859	1	ACCACTAGAACCACCCAAG	11024781	11024840	CCATCTTTTTTCCTGAAATTTCAAAAAAAAAAAAACGAAAAGAAAAGACGAGCCACCACA	11024825	11024835	+	0	30
XZ1514_I:2833139:C->T_1997	XZ1514	GCAATCGTCGCGCGGAGAGNNNNNNNNNNCTTCAGCTTCCCGATATCCGACGGTAGTGTTAGGGGGAGGTGGTGGCTCTG	I:2833069-2833168/21,19/+	0.998025	I	2833069	2833089	1	TAGGGGGAGGTGGTGGCTCTG	2833150	2833168	1	GCAATCGTCGCGCGGAGAG	2833090	2833149	GCGATGAGCTGGAAAAAGAAGGTCATTAAGCGAGAAATTTGAATAAAACCTAATCAGACC	2833134	2833144	+	0	30
XZ1514_II:2134220:A->C_7608	XZ1514	CCGCAGCACGTCCAATTCCNNNNNNNNNNCTTCAGCTTCCCGATATCCGACGGTAGTGTTCGTTTGGTAGGCGAGCTCGG	II:2134150-2134249/21,19/+	0.994555	II	2134150	2134170	1	TCGTTTGGTAGGCGAGCTCGG	2134231	2134249	1	CCGCAGCACGTCCAATTCC	2134171	2134230	TGACTGGAGTTTTGAAATTAAAATTGATAACTAGATCTTACAAAATCTTACAAGCAAACG	2134215	2134225	+	0	30
XZ1514_III:11917940:T->A_17136	XZ1514	TCTCTGCCACCACAGGAATCNNNNNNNNNNCTTCAGCTTCCCGATATCCGACGGTAGTGTACATAACAACTCAAATCAAC	III:11917871-11917970/20,20/+	0.994695	III	11917871	11917890	1	ACATAACAACTCAAATCAAC	11917951	11917970	1	TCTCTGCCACCACAGGAATC	11917891	11917950	AGAGAGAGATGTAAAAACAAAACAAAACAAAAAAAGAAAGTATTTCCAGTATTGCTCAAG	11917935	11917945	+	0	31
XZ1514_IV:4851047:A->G_20618	XZ1514	GTGGCCACCTTGCCAGACACNNNNNNNNNNCTTCAGCTTCCCGATATCCGACGGTAGTGTTGGAATCCCTCCCGAGAATG	IV:4850978-4851077/20,20/+	0.999118	IV	4850978	4850997	1	TGGAATCCCTCCCGAGAATG	4851058	4851077	1	GTGGCCACCTTGCCAGACAC	4850998	4851057	AAAAAAAAGAGAGAGAAAGGAAATTTGAAAAAAAAGAAAATATAAGGTGAAGAAAGCAGC	4851042	4851052	+	0	31
XZ1515_I:14784181:T->A_2548	XZ1515	TGCCGGCCCCTGAACATAACNNNNNNNNNNCTTCAGCTTCCCGATATCCGACGGTAGTGTGGATGTTCAGGGGCCGGCAA	I:14784112-14784211/20,20/+	0.993949	I	14784112	14784131	1	GGATGTTCAGGGGCCGGCAA	14784192	14784211	1	TGCCGGCCCCTGAACATAAC	14784132	14784191	ACATTCAGAATCTTTTTTTAAAAAAATTTTCTAAATTTTCAAAAAAAAATGCTAGATTTT	14784145	14784186	+	0	31
XZ1515_II:2854786:C->A_2956	XZ1515	ATAAAAACCACCGCCACCTCCNNNNNNNNNNCTTCAGCTTCCCGATATCCGACGGTAGTGTAAAAAGTACCCGGTACAGT	II:2854718-2854817/19,21/+	0.989572	II	2854718	2854736	1	AAAAAGTACCCGGTACAGT	2854797	2854817	1	ATAAAAACCACCGCCACCTCC	2854737	2854796	ATGAAAACTGGTAGATCAGGAAATAAAAGCTGAAACTAATAATAATAAACGTCATATAGT	2854781	2854791	+	0	32
XZ1515_IV:5669898:G->T_3597	XZ1515	TAGTGACCGCCGGGAGGCTNNNNNNNNNNCTTCAGCTTCCCGATATCCGACGGTAGTGTAAAATAAAAGAATGAGGCAAA	IV:5669828-5669927/21,19/+	0.987716	IV	5669828	5669848	1	AAAATAAAAGAATGAGGCAAA	5669909	5669927	1	TAGTGACCGCCGGGAGGCT	5669849	5669908	AAGAAGAACCCATTGTAAAAATATTTTGAAACAAAAGTGAATGAGATAGGATCGGAATAA	5669892	5669903	+	0	30
XZ1515_X:2664105:A->T_7071	XZ1515	TTGACTGACCTCCTCATCGNNNNNNNNNNCTTCAGCTTCCCGATATCCGACGGTAGTGTTGGTAGAAGCGTTTTTGCGGC	X:2664035-2664134/21,19/+	0.999425	X	2664035	2664055	1	TGGTAGAAGCGTTTTTGCGGC	2664116	2664134	1	TTGACTGACCTCCTCATCG	2664056	2664115	GCCGCCGCCCTAGTTGAGATTTATCAAAATAAAAAAAATAAAAAAATAAAAAAACAAAAA	2664090	2664110	+	0	30
XZ1516_I:13002705:A->T_13072	XZ1516	TCCTATCTCCTCCCTCACTAACCNNNNNNNNNNCTTCAGCTTCCCGATATCCGACGGTAGTGTAGGCGCATGGCTTGAAA	I:13002639-13002738/17,23/+	0.997004	I	13002639	13002655	2	AGGCGCATGGCTTGAAA	13002716	13002738	1	TCCTATCTCCTCCCTCACTAACC	13002656	13002715	AGTATGAAGTTTAGAAATTTTACAGAAAAAACGAAAAAAAAATCCGAAAAAACCAGAATT	13002700	13002710	+	0	34
XZ1516_II:10948783:G->A_30535	XZ1516	CACGAGAAGTACACACGCGNNNNNNNNNNCTTCAGCTTCCCGATATCCGACGGTAGTGTGATGCGAGAGGAATAGAAACG	II:10948713-10948812/21,19/+	0.998213	II	10948713	10948733	1	GATGCGAGAGGAATAGAAACG	10948794	10948812	1	CACGAGAAGTACACACGCG	10948734	10948793	GTAAAAATTAAAGAAAAAACCAATAAAACTAAAAAAGAAGCGAAACAAAGCACACTTGTC	10948778	10948788	+	0	30
XZ1516_III:13107706:A->C_52533	XZ1516	TGCCAGCTGCCATCGCTTGNNNNNNNNNNCTTCAGCTTCCCGATATCCGACGGTAGTGTGGGCTGCTTGGTGTTGGGGGT	III:13107636-13107735/21,19/+	0.997893	III	13107636	13107656	1	GGGCTGCTTGGTGTTGGGGGT	13107717	13107735	1	TGCCAGCTGCCATCGCTTG	13107657	13107716	TCCCACGTCACAAATATACCTATCAGAATAAAATCATGTGTAAACGGATATCAGCATTAT	13107698	13107711	+	0	30
XZ1516_IV:535476:T->A_53684	XZ1516	CCAAACGCTGCTTCAGGTATCNNNNNNNNNNCTTCAGCTTCCCGATATCCGACGGTAGTGTGATCGCCCGGATCAGCTCC	IV:535408-535507/19,21/+	0.99896	IV	535408	535426	1	GATCGCCCGGATCAGCTCC	535487	535507	1	CCAAACGCTGCTTCAGGTATC	535427	535486	CCGAAAAAGTGAAAAAGGTATTTCCGATTTTAAAATCTAAATTAAAAAATAAAAAAAAAA	535465	535481	+	0	32

## Sheet: MIPFilter_pilot
mip_name	mip_name_filter	strain_name	concordance	singleton	MAF_variants	goodmips_strain	chromosome	chromosome.1	ref	alt	ref_read_count	alt_read_count	other1_read_count2	other2_read_count2	otherread_total	other1_read_count	other2_read_count	ref_read_freq	alt_read_freq	other1_read_freq	other2_read_freq	ref_umi_count	alt_umi_count	other1_umi_count	other2_umi_count	ref_umi_freq	alt_umi_freq	other1_umi_freq	other2_umi_freq	alt_to_refandalt	totalreads_altandref	include_ratio	include_altandref_reads between 20K and 2000000	include_otherreads_lessthan20K	include_final
CB4854_I:1341686:T->C,A_0099	yes.CB4854_I:1341686:T->C,A_0099	CB4854	0.93515	1412	8742	3	CB4854_I	I	T	C	496069	5314	7155	38	7193	A:7155	G:38	0.00200848	2.15e-05	A:0.00002897	G:0.00000015	267666	3221	A:4322	G:37	0.00222453	2.68e-05	A:0.00003592	G:0.00000031	0.0105987	501383	yes	yes	yes	yes
CB4854_II:14776068:G->A_1044	yes.CB4854_II:14776068:G->A_1044	CB4854	0.93515	1412	8742		CB4854_II	II	G	A	181980	3317	16	38	54	C:16	T:38	0.0007368	1.34e-05	C:0.00000006	T:0.00000015	112026	2224	C:16	T:38	0.00093103	1.85e-05	C:0.00000013	T:0.00000032	0.017901	185297	yes	yes	yes	yes
CB4854_IV:13844144:T->C_1393	no.CB4854_IV:13844144:T->C_1393	CB4854	0.93515	1412	8742		CB4854_IV	IV	T	C	3	2	0	2	2	A:0	G:2	1e-08	1e-08	A:0	G:0.00000001	2	2	A:0	G:2	2e-08	2e-08	A:0	G:0.00000002	0.4	5	no	no	yes	no
CB4854_X:15144403:A->T_1770	yes.CB4854_X:15144403:A->T_1770	CB4854	0.93515	1412	8742		CB4854_X	X	A	T	501802	5117	248	309	557	C:248	G:309	0.0020317	2.07e-05	C:0.00000100	G:0.00000125	287709	3441	C:248	G:307	0.0023911	2.86e-05	C:0.00000206	G:0.00000255	0.0100943	506919	yes	yes	yes	yes
CB4856_I:9767293:G->A_2812	yes.CB4856_I:9767293:G->A_2812	CB4856	0.891067	18210	43705	4	CB4856_I	I	G	A	776981	11285	9	99	108	C:9	T:99	0.00314584	4.57e-05	C:0.00000004	T:0.00000040	378697	6625	C:9	T:97	0.00314729	5.51e-05	C:0.00000007	T:0.00000081	0.0143162	788266	yes	yes	yes	yes
CB4856_III:1209062:A->G_9612	yes.CB4856_III:1209062:A->G_9612	CB4856	0.891067	18210	43705		CB4856_III	III	A	G	210876	2942	6	9	15	C:6	T:9	0.00085379	1.19e-05	C:0.00000002	T:0.00000004	124644	1867	C:6	T:9	0.0010359	1.55e-05	C:0.00000005	T:0.00000007	0.0137594	213818	yes	yes	yes	yes
CB4856_IV:1607284:A->C_12264	yes.CB4856_IV:1607284:A->C_12264	CB4856	0.891067	18210	43705		CB4856_IV	IV	A	C	404514	9440	165	156	321	G:165	T:156	0.0016378	3.82e-05	G:0.00000067	T:0.00000063	233112	6179	G:165	T:155	0.00193736	5.14e-05	G:0.00000137	T:0.00000129	0.0228045	413954	yes	yes	yes	yes
CB4856_X:13967551:G->A_23167	yes.CB4856_X:13967551:G->A_23167	CB4856	0.891067	18210	43705		CB4856_X	X	G	A	618718	8971	35	81	116	C:35	T:81	0.00250506	3.63e-05	C:0.00000014	T:0.00000033	316992	5464	C:35	T:81	0.00263447	4.54e-05	C:0.00000029	T:0.00000067	0.0142921	627689	yes	yes	yes	yes
CX11254_II:12788569:T->A_0182	no.CX11254_II:12788569:T->A_0182	CX11254	0.923244	329	8812	2	CX11254_II	II	T	A	256403	33	25	23	48	C:25	G:23	0.00103812	1.3e-07	C:0.00000010	G:0.00000009	145760	33	C:25	G:23	0.00121139	2.7e-07	C:0.00000021	G:0.00000019	0.000128687	256436	no	yes	yes	no
CX11254_III:10578934:G->A_0248	yes.CX11254_III:10578934:G->A_0248	CX11254	0.923244	329	8812		CX11254_III	III	G	A	825001	4302	159	445	604	C:159	T:445	0.00334026	1.74e-05	C:0.00000064	T:0.00000180	423474	2704	C:158	T:442	0.00351942	2.25e-05	C:0.00000131	T:0.00000367	0.00518749	829303	yes	yes	yes	yes
CX11254_V:13687742:A->C_0333	no.CX11254_V:13687742:A->C_0333	CX11254	0.923244	329	8812		CX11254_V	V	A	C	920248	16	62	21	83	G:62	T:21	0.0037259	6e-08	G:0.00000025	T:0.00000009	471454	16	G:61	T:21	0.00391818	1.3e-07	G:0.00000051	T:0.00000017	1.74e-05	920264	no	yes	yes	no
CX11254_V:238621:A->G_0301	yes.CX11254_V:238621:A->G_0301	CX11254	0.923244	329	8812		CX11254_V	V	A	G	768419	4136	5	200	205	C:5	T:200	0.00311117	1.68e-05	C:0.00000002	T:0.00000081	381833	2473	C:5	T:192	0.00317335	2.06e-05	C:0.00000004	T:0.00000160	0.00535366	772555	yes	yes	yes	yes
CX11262_I:12073209:C->A_0057	no.CX11262_I:12073209:C->A_0057	CX11262	0.918366	407	13849	0	CX11262_I	I	C	A	110937	62	5	12	17	G:5	T:12	0.00044916	2.5e-07	G:0.00000002	T:0.00000005	64777	45	G:5	T:12	0.00053835	3.7e-07	G:0.00000004	T:0.00000010	0.000558564	110999	no	yes	yes	no
CX11262_III:12331372:T->A_0209	no.CX11262_III:12331372:T->A_0209	CX11262	0.918366	407	13849		CX11262_III	III	T	A	110074	271	13	5168	5181	C:13	G:5168	0.00044567	1.1e-06	C:0.00000005	G:0.00002092	58575	152	C:13	G:2227	0.00048681	1.26e-06	C:0.00000011	G:0.00001851	0.00245593	110345	no	yes	yes	no
CX11262_V:19829399:C->T_0424	no.CX11262_V:19829399:C->T_0424	CX11262	0.918366	407	13849		CX11262_V	V	C	T	359554	22030	868	214	1082	A:868	G:214	0.00145576	8.92e-05	A:0.00000351	G:0.00000087	188277	9986	A:495	G:142	0.00156474	8.3e-05	A:0.00000411	G:0.00000118	0.057733	381584	no	yes	yes	no
CX11264_IV:11244600:G->A_0125	yes.CX11264_IV:11244600:G->A_0125	CX11264	0.915553	896	14417	4	CX11264_IV	IV	G	A	1066222	12647	397	1404	1801	C:397	T:1404	0.00431692	5.12e-05	C:0.00000161	T:0.00000568	457804	8692	C:397	T:1397	0.00380474	7.22e-05	C:0.00000330	T:0.00001161	0.0117225	1078869	yes	yes	yes	yes
CX11264_V:17198338:C->G_0165	yes.CX11264_V:17198338:C->G_0165	CX11264	0.915553	896	14417		CX11264_V	V	C	G	549589	6658	177	49	226	A:177	T:49	0.00222518	2.7e-05	A:0.00000072	T:0.00000020	286724	4171	A:160	T:49	0.00238292	3.47e-05	A:0.00000133	T:0.00000041	0.0119695	556247	yes	yes	yes	yes
CX11264_X:2275255:G->C_0412	yes.CX11264_X:2275255:G->C_0412	CX11264	0.915553	896	14417		CX11264_X	X	G	C	949406	8287	123	80	203	A:123	T:80	0.00384395	3.36e-05	A:0.00000050	T:0.00000032	464886	5226	A:116	T:80	0.00386359	4.34e-05	A:0.00000096	T:0.00000066	0.00865309	957693	yes	yes	yes	yes
CX11264_X:6426986:A->C_0583	yes.CX11264_X:6426986:A->C_0583	CX11264	0.915553	896	14417		CX11264_X	X	A	C	714828	6209	207	207	414	G:207	T:207	0.00289419	2.51e-05	G:0.00000084	T:0.00000084	337634	3854	G:207	T:207	0.00280602	3.2e-05	G:0.00000172	T:0.00000172	0.00861121	721037	yes	yes	yes	yes
CX11271_I:10356319:G->A_0062	yes.CX11271_I:10356319:G->A_0062	CX11271	0.937059	910	2679	4	CX11271_I	I	G	A	947613	8854	34	125	159	C:34	T:125	0.00383669	3.59e-05	C:0.00000014	T:0.00000051	432415	4950	C:34	T:125	0.00359373	4.11e-05	C:0.00000028	T:0.00000104	0.00925698	956467	yes	yes	yes	yes
CX11271_II:12842575:T->A_0147	yes.CX11271_II:12842575:T->A_0147	CX11271	0.937059	910	2679		CX11271_II	II	T	A	61663	280	7	6	13	C:7	G:6	0.00024966	1.13e-06	C:0.00000003	G:0.00000002	43524	205	C:7	G:6	0.00036172	1.7e-06	C:0.00000006	G:0.00000005	0.00452028	61943	yes	yes	yes	yes
CX11271_III:2697403:C->G_0218	yes.CX11271_III:2697403:C->G_0218	CX11271	0.937059	910	2679		CX11271_III	III	C	G	250445	2109	146	15	161	A:146	T:15	0.001014	8.54e-06	A:0.00000059	T:0.00000006	161659	1435	A:123	T:15	0.00134352	1.19e-05	A:0.00000102	T:0.00000012	0.00835069	252554	yes	yes	yes	yes
CX11271_IV:1231923:C->T_0690	yes.CX11271_IV:1231923:C->T_0690	CX11271	0.937059	910	2679		CX11271_IV	IV	C	T	335544	3020	156	10	166	A:156	G:10	0.00135855	1.22e-05	A:0.00000063	G:0.00000004	194914	1864	A:112	G:10	0.0016199	1.55e-05	A:0.00000093	G:0.00000008	0.00892003	338564	yes	yes	yes	yes
CX11276_I:11281245:C->T_0361	yes.CX11276_I:11281245:C->T_0361	CX11276	0.929753	1807	6972	4	CX11276_I	I	C	T	677483	4540	316	7	323	A:316	G:7	0.00274299	1.84e-05	A:0.00000128	G:0.00000003	358799	2906	A:238	G:7	0.00298192	2.42e-05	A:0.00000198	G:0.00000006	0.00665667	682023	yes	yes	yes	yes
CX11276_III:359396:G->A_1022	yes.CX11276_III:359396:G->A_1022	CX11276	0.929753	1807	6972		CX11276_III	III	G	A	333791	2258	10	31	41	C:10	T:31	0.00135145	9.14e-06	C:0.00000004	T:0.00000013	168430	1297	C:10	T:31	0.00139979	1.08e-05	C:0.00000008	T:0.00000026	0.00671926	336049	yes	yes	yes	yes
CX11276_V:20320751:A->G_1810	yes.CX11276_V:20320751:A->G_1810	CX11276	0.929753	1807	6972		CX11276_V	V	A	G	440761	3643	157	215	372	C:157	T:215	0.00178455	1.48e-05	C:0.00000064	T:0.00000087	250729	2431	C:157	T:215	0.00208377	2.02e-05	C:0.00000130	T:0.00000179	0.0081975	444404	yes	yes	yes	yes
CX11276_X:15381676:C->T_2053	yes.CX11276_X:15381676:C->T_2053	CX11276	0.929753	1807	6972		CX11276_X	X	C	T	67243	516	388	134	522	A:388	G:134	0.00027225	2.09e-06	A:0.00000157	G:0.00000054	58823	473	A:385	G:133	0.00048887	3.93e-06	A:0.00000320	G:0.00000111	0.00761522	67759	yes	yes	yes	yes
CX11285_II:9262194:G->A_0142	yes.CX11285_II:9262194:G->A_0142	CX11285	0.920591	655	12615	3	CX11285_II	II	G	A	581379	10165	42	223	265	C:42	T:223	0.00235389	4.12e-05	C:0.00000017	T:0.00000090	340589	6631	C:42	T:220	0.00283058	5.51e-05	C:0.00000035	T:0.00000183	0.0171838	591544	yes	yes	yes	yes
CX11285_III:12362318:G->C_0276	no.CX11285_III:12362318:G->C_0276	CX11285	0.920591	655	12615		CX11285_III	III	G	C	181450	10	23	22	45	A:23	T:22	0.00073465	4e-08	A:0.00000009	T:0.00000009	110536	10	A:22	T:19	0.00091865	8e-08	A:0.00000018	T:0.00000016	5.51e-05	181460	no	yes	yes	no
CX11285_IV:4747802:C->A_0343	yes.CX11285_IV:4747802:C->A_0343	CX11285	0.920591	655	12615		CX11285_IV	IV	C	A	782132	9300	25	105	130	G:25	T:105	0.0031667	3.77e-05	G:0.00000010	T:0.00000043	381477	5623	G:25	T:105	0.00317039	4.67e-05	G:0.00000021	T:0.00000087	0.0117509	791432	yes	yes	yes	yes
CX11285_X:7864359:A->C_0624	yes.CX11285_X:7864359:A->C_0624	CX11285	0.920591	655	12615		CX11285_X	X	A	C	144823	2274	26	19	45	G:26	T:19	0.00058636	9.21e-06	G:0.00000011	T:0.00000008	98242	1656	G:26	T:19	0.00081647	1.38e-05	G:0.00000022	T:0.00000016	0.0154592	147097	yes	yes	yes	yes
CX11307_I:11966814:T->G_0086	yes.CX11307_I:11966814:T->G_0086	CX11307	0.917543	896	13627	3	CX11307_I	I	T	G	429979	5115	90	60	150	A:90	C:60	0.0017409	2.07e-05	A:0.00000036	C:0.00000024	249837	3379	A:90	C:60	0.00207636	2.81e-05	A:0.00000075	C:0.00000050	0.0117561	435094	yes	yes	yes	yes
CX11307_II:11271250:G->A_0349	yes.CX11307_II:11271250:G->A_0349	CX11307	0.917543	896	13627		CX11307_II	II	G	A	734548	8362	29	69	98	C:29	T:69	0.00297404	3.39e-05	C:0.00000012	T:0.00000028	377478	5011	C:29	T:69	0.00313716	4.17e-05	C:0.00000024	T:0.00000057	0.0112557	742910	yes	yes	yes	yes
CX11307_IV:16321575:C->T_0502	yes.CX11307_IV:16321575:C->T_0502	CX11307	0.917543	896	13627		CX11307_IV	IV	C	T	168445	2367	138	3	141	A:138	G:3	0.000682	9.58e-06	A:0.00000056	G:0.00000001	99665	1521	A:99	G:3	0.0008283	1.26e-05	A:0.00000082	G:0.00000002	0.0138573	170812	yes	yes	yes	yes
CX11307_V:16498729:A->T_0707	no.CX11307_V:16498729:A->T_0707	CX11307	0.917543	896	13627		CX11307_V	V	A	T	149061	6	6	39	45	C:6	G:39	0.00060352	2e-08	C:0.00000002	G:0.00000016	90482	6	C:6	G:39	0.00075198	5e-08	C:0.00000005	G:0.00000032	4.03e-05	149067	no	yes	yes	no
DL200_I:14791278:G->A_0113	yes.DL200_I:14791278:G->A_0113	DL200	0.932107	673	2594	3	DL200_I	I	G	A	786633	5665	156	155	311	C:156	T:155	0.00318492	2.29e-05	C:0.00000063	T:0.00000063	422998	3623	C:156	T:150	0.00351547	3.01e-05	C:0.00000130	T:0.00000125	0.00715009	792298	yes	yes	yes	yes
DL200_II:10684581:C->T_0188	no.DL200_II:10684581:C->T_0188	DL200	0.932107	673	2594		DL200_II	II	C	T	268528	136585	149	40	189	A:149	G:40	0.00108722	0.00055301	A:0.00000060	G:0.00000016	152738	83039	A:132	G:40	0.00126938	0.00069012	A:0.00000110	G:0.00000033	0.337153	405113	no	yes	yes	no
DL200_V:17954136:A->G_0656	yes.DL200_V:17954136:A->G_0656	DL200	0.932107	673	2594		DL200_V	V	A	G	498106	2990	25	24	49	C:25	T:24	0.00201673	1.21e-05	C:0.00000010	T:0.00000010	282753	1976	C:25	T:24	0.00234991	1.64e-05	C:0.00000021	T:0.00000020	0.00596692	501096	yes	yes	yes	yes
DL200_X:16129009:C->T_0867	yes.DL200_X:16129009:C->T_0867	DL200	0.932107	673	2594		DL200_X	X	C	T	223622	1397	237	100	337	A:237	G:100	0.0009054	5.66e-06	A:0.00000096	G:0.00000040	144826	1020	A:219	G:99	0.00120363	8.48e-06	A:0.00000182	G:0.00000082	0.00620837	225019	yes	yes	yes	yes
DL226_I:15015474:A->T_0374	yes.DL226_I:15015474:A->T_0374	DL226	0.926598	1389	8462	3	DL226_I	I	A	T	1092579	6361	46	123	169	C:46	G:123	0.00442363	2.58e-05	C:0.00000019	G:0.00000050	525135	3890	C:46	G:123	0.00436431	3.23e-05	C:0.00000038	G:0.00000102	0.0057883	1098940	yes	yes	yes	yes
DL226_II:9596545:G->T_0445	no.DL226_II:9596545:G->T_0445	DL226	0.926598	1389	8462		DL226_II	II	G	T	646598	393871	222	70	292	A:222	C:70	0.00261795	0.0015947	A:0.00000090	C:0.00000028	367094	237040	A:215	C:70	0.00305086	0.00197	A:0.00000179	C:0.00000058	0.378551	1040469	no	yes	yes	no
DL226_IV:13272736:G->A_0890	yes.DL226_IV:13272736:G->A_0890	DL226	0.926598	1389	8462		DL226_IV	IV	G	A	525694	3107	12	40	52	C:12	T:40	0.00212843	1.26e-05	C:0.00000005	T:0.00000016	305778	2063	C:12	T:35	0.00254127	1.72e-05	C:0.00000010	T:0.00000029	0.00587556	528801	yes	yes	yes	yes
DL226_V:16590610:A->T_1043	yes.DL226_V:16590610:A->T_1043	DL226	0.926598	1389	8462		DL226_V	V	A	T	477652	5334	177	231	408	C:177	G:231	0.00193392	2.16e-05	C:0.00000072	G:0.00000094	244184	3080	C:175	G:231	0.00202937	2.56e-05	C:0.00000145	G:0.00000192	0.0110438	482986	yes	yes	yes	yes
DL238_I:12524422:A->T_2849	yes.DL238_I:12524422:A->T_2849	DL238	0.883085	27851	51477	3	DL238_I	I	A	T	53933	790	3	8	11	C:3	G:8	0.00021836	3.2e-06	C:0.00000001	G:0.00000003	34004	501	C:3	G:8	0.0002826	4.16e-06	C:0.00000002	G:0.00000007	0.0144363	54723	yes	yes	yes	yes
DL238_II:12072245:G->T_7537	no.DL238_II:12072245:G->T_7537	DL238	0.883085	27851	51477		DL238_II	II	G	T	168	3	0	0	0	A:0	C:0	6.8e-07	1e-08	A:0	C:0	135	3	A:0	C:0	1.12e-06	2e-08	A:0	C:0	0.0175439	171	yes	no	yes	no
DL238_III:12556120:G->T_11662	yes.DL238_III:12556120:G->T_11662	DL238	0.883085	27851	51477		DL238_III	III	G	T	529593	4823	68	16	84	A:68	C:16	0.00214422	1.95e-05	A:0.00000028	C:0.00000006	242406	2558	A:68	C:16	0.0020146	2.13e-05	A:0.00000057	C:0.00000013	0.00902481	534416	yes	yes	yes	yes
DL238_IV:807883:A->T_12381	yes.DL238_IV:807883:A->T_12381	DL238	0.883085	27851	51477		DL238_IV	IV	A	T	569071	7408	222	214	436	C:222	G:214	0.00230405	3e-05	C:0.00000090	G:0.00000087	280589	4278	C:222	G:213	0.00233193	3.56e-05	C:0.00000185	G:0.00000177	0.0128504	576479	yes	yes	yes	yes
ECA189_I:11586767:T->A_0519	yes.ECA189_I:11586767:T->A_0519	ECA189	0.889659	10144	36440	4	ECA189_I	I	T	A	518566	6573	144	270	414	C:144	G:270	0.00209957	2.66e-05	C:0.00000058	G:0.00000109	280871	4217	C:143	G:270	0.00233427	3.51e-05	C:0.00000119	G:0.00000224	0.0125167	525139	yes	yes	yes	yes
ECA189_III:3209354:T->C_3149	yes.ECA189_III:3209354:T->C_3149	ECA189	0.889659	10144	36440		ECA189_III	III	T	C	312123	3684	119	114	233	A:119	G:114	0.00126372	1.49e-05	A:0.00000048	G:0.00000046	176733	2310	A:119	G:114	0.0014688	1.92e-05	A:0.00000099	G:0.00000095	0.0116654	315807	yes	yes	yes	yes
ECA189_IV:16342115:G->A_5404	yes.ECA189_IV:16342115:G->A_5404	ECA189	0.889659	10144	36440		ECA189_IV	IV	G	A	171031	2434	8	15	23	C:8	T:15	0.00069247	9.85e-06	C:0.00000003	T:0.00000006	100705	1447	C:8	T:14	0.00083694	1.2e-05	C:0.00000007	T:0.00000012	0.0140316	173465	yes	yes	yes	yes
ECA189_V:18750651:G->A_7860	yes.ECA189_V:18750651:G->A_7860	ECA189	0.889659	10144	36440		ECA189_V	V	G	A	265879	1653	17	47	64	C:17	T:47	0.00107649	6.69e-06	C:0.00000007	T:0.00000019	141953	1540	C:17	T:44	0.00117975	1.28e-05	C:0.00000014	T:0.00000037	0.0061787	267532	yes	yes	yes	yes
ECA191_I:14707170:A->G_5392	no.ECA191_I:14707170:A->G_5392	ECA191	0.804345	33526	164279	2	ECA191_I	I	A	G	999171	513	340	248	588	C:340	T:248	0.00404544	2.08e-06	C:0.00000138	T:0.00000100	447537	509	C:340	T:239	0.00371941	4.23e-06	C:0.00000283	T:0.00000199	0.000513162	999684	no	yes	yes	no
ECA191_II:11937699:A->G_9779	yes.ECA191_II:11937699:A->G_9779	ECA191	0.804345	33526	164279		ECA191_II	II	A	G	698051	7857	302	381	683	C:302	T:381	0.00282627	3.18e-05	C:0.00000122	T:0.00000154	359582	5415	C:302	T:381	0.00298843	4.5e-05	C:0.00000251	T:0.00000317	0.0111303	705908	yes	yes	yes	yes
ECA191_III:13349506:G->C_16643	no.ECA191_III:13349506:G->C_16643	ECA191	0.804345	33526	164279		ECA191_III	III	G	C	828675	13441	21759	352	22111	A:21759	T:352	0.00335514	5.44e-05	A:0.00008810	T:0.00000143	395946	7938	A:20446	T:348	0.00329064	6.6e-05	A:0.00016992	T:0.00000289	0.015961	842116	yes	yes	no	no
ECA191_IV:1126414:G->A_17243	yes.ECA191_IV:1126414:G->A_17243	ECA191	0.804345	33526	164279		ECA191_IV	IV	G	A	701990	11010	17	81	98	C:17	T:81	0.00284222	4.46e-05	C:0.00000007	T:0.00000033	347456	6253	C:16	T:77	0.00288765	5.2e-05	C:0.00000013	T:0.00000064	0.0154418	713000	yes	yes	yes	yes
ECA348_II:1153436:G->A_0106	no.ECA348_II:1153436:G->A_0106	ECA348	0.920349	515	12975	0	ECA348_II	II	G	A	701854	292386	193	665	858	C:193	T:665	0.00284167	0.00118381	C:0.00000078	T:0.00000269	374311	166353	C:193	T:661	0.00311084	0.00138253	C:0.00000160	T:0.00000549	0.29408	994240	no	yes	yes	no
ECA348_III:1413663:G->T_0380	no.ECA348_III:1413663:G->T_0380	ECA348	0.920349	515	12975		ECA348_III	III	G	T	118453	89	41	18	59	A:41	C:18	0.00047959	3.6e-07	A:0.00000017	C:0.00000007	80932	79	A:41	C:18	0.00067261	6.6e-07	A:0.00000034	C:0.00000015	0.000750789	118542	no	yes	yes	no
ECA348_IV:1833820:C->T_0459	no.ECA348_IV:1833820:C->T_0459	ECA348	0.920349	515	12975		ECA348_IV	IV	C	T	814262	87	58	23	81	A:58	G:23	0.00329678	3.5e-07	A:0.00000023	G:0.00000009	413059	83	A:58	G:23	0.00343287	6.9e-07	A:0.00000048	G:0.00000019	0.000106834	814349	no	yes	yes	no
ECA348_V:19083280:A->G,C_0727	no.ECA348_V:19083280:A->G,C_0727	ECA348	0.920349	515	12975		ECA348_V	V	A	G	549573	686600	169	180	349	C:169	T:180	0.00222511	0.00277991	C:0.00000068	T:0.00000073	306778	232826	C:123	T:170	0.00254958	0.00193498	C:0.00000102	T:0.00000141	0.555424	1236173	no	yes	yes	no
ECA36_I:14280567:G->A_2727	yes.ECA36_I:14280567:G->A_2727	ECA36	0.78448	13751	187219	4	ECA36_I	I	G	A	204200	2780	4	13	17	C:4	T:13	0.00082676	1.13e-05	C:0.00000002	T:0.00000005	123517	1817	C:4	T:13	0.00102653	1.51e-05	C:0.00000003	T:0.00000011	0.0134312	206980	yes	yes	yes	yes
ECA36_II:4106388:G->A_4154	yes.ECA36_II:4106388:G->A_4154	ECA36	0.78448	13751	187219		ECA36_II	II	G	A	703651	11584	17	62	79	C:17	T:62	0.00284894	4.69e-05	C:0.00000007	T:0.00000025	359157	6941	C:17	T:57	0.0029849	5.77e-05	C:0.00000014	T:0.00000047	0.0161961	715235	yes	yes	yes	yes
ECA36_III:3384340:A->T_5733	yes.ECA36_III:3384340:A->T_5733	ECA36	0.78448	13751	187219		ECA36_III	III	A	T	509962	5580	23	61	84	C:23	G:61	0.00206473	2.26e-05	C:0.00000009	G:0.00000025	273517	3553	C:23	G:61	0.00227316	2.95e-05	C:0.00000019	G:0.00000051	0.0108236	515542	yes	yes	yes	yes
ECA36_V:11695823:G->A_9401	yes.ECA36_V:11695823:G->A_9401	ECA36	0.78448	13751	187219		ECA36_V	V	G	A	1530313	29353	842	1996	2838	C:842	T:1996	0.00619593	0.00011884	C:0.00000341	T:0.00000808	606480	17844	C:836	T:1972	0.00504036	0.0001483	C:0.00000695	T:0.00001639	0.0188201	1559666	yes	yes	yes	yes
ECA363_I:2855432:G->T_0582	yes.ECA363_I:2855432:G->T_0582	ECA363	0.789919	25178	186105	4	ECA363_I	I	G	T	25202	267	5	0	5	A:5	C:0	0.00010204	1.08e-06	A:0.00000002	C:0	16041	173	A:5	C:0	0.00013331	1.44e-06	A:0.00000004	C:0	0.0104833	25469	yes	yes	yes	yes
ECA363_II:15266803:A->C_8126	yes.ECA363_II:15266803:A->C_8126	ECA363	0.789919	25178	186105		ECA363_II	II	A	C	1300434	14414	463	249	712	G:463	T:249	0.0052652	5.84e-05	G:0.00000187	T:0.00000101	582377	8473	G:460	T:249	0.00484004	7.04e-05	G:0.00000382	T:0.00000207	0.0109625	1314848	yes	yes	yes	yes
ECA363_III:11578112:G->T_11060	yes.ECA363_III:11578112:G->T_11060	ECA363	0.789919	25178	186105		ECA363_III	III	G	T	41888	395	24	5	29	A:24	C:5	0.0001696	1.6e-06	A:0.00000010	C:0.00000002	26343	268	A:24	C:5	0.00021893	2.23e-06	A:0.00000020	C:0.00000004	0.00934182	42283	yes	yes	yes	yes
ECA363_IV:16962528:A->T_14602	yes.ECA363_IV:16962528:A->T_14602	ECA363	0.789919	25178	186105		ECA363_IV	IV	A	T	458299	4049	8	74	82	C:8	G:74	0.00185556	1.64e-05	C:0.00000003	G:0.00000030	243855	2507	C:8	G:74	0.00202664	2.08e-05	C:0.00000007	G:0.00000062	0.00875747	462348	yes	yes	yes	yes
ECA369_I:7301895:A->T_2312	yes.ECA369_I:7301895:A->T_2312	ECA369	0.817567	53087	142573	4	ECA369_I	I	A	T	1159361	13076	16	106	122	C:16	G:106	0.00469402	5.29e-05	C:0.00000006	G:0.00000043	541287	7540	C:16	G:106	0.00449855	6.27e-05	C:0.00000013	G:0.00000088	0.0111528	1172437	yes	yes	yes	yes
ECA369_II:11110077:A->C_10550	yes.ECA369_II:11110077:A->C_10550	ECA369	0.817567	53087	142573		ECA369_II	II	A	C	702970	7715	235	102	337	G:235	T:102	0.00284618	3.12e-05	G:0.00000095	T:0.00000041	376724	4904	G:234	T:102	0.00313089	4.08e-05	G:0.00000194	T:0.00000085	0.0108557	710685	yes	yes	yes	yes
ECA369_III:9234831:T->C_14531	yes.ECA369_III:9234831:T->C_14531	ECA369	0.817567	53087	142573		ECA369_III	III	T	C	628329	7682	180	112	292	A:180	G:112	0.00254398	3.11e-05	A:0.00000073	G:0.00000045	341805	4733	A:180	G:112	0.00284069	3.93e-05	A:0.00000150	G:0.00000093	0.0120784	636011	yes	yes	yes	yes
ECA369_IV:2126314:A->T_17026	yes.ECA369_IV:2126314:A->T_17026	ECA369	0.817567	53087	142573		ECA369_IV	IV	A	T	77449	712	8	12	20	C:8	G:12	0.00031358	2.88e-06	C:0.00000003	G:0.00000005	48718	448	C:8	G:12	0.00040489	3.72e-06	C:0.00000007	G:0.00000010	0.0091094	78161	yes	yes	yes	yes
ECA372_I:10364967:A->C_0096	yes.ECA372_I:10364967:A->C_0096	ECA372	0.902226	2955	26549	3	ECA372_I	I	A	C	809349	9125	247	107	354	G:247	T:107	0.00327689	3.7e-05	G:0.00000100	T:0.00000043	416746	5502	G:247	T:106	0.00346351	4.57e-05	G:0.00000205	T:0.00000088	0.0111488	818474	yes	yes	yes	yes
ECA372_II:11316190:A->T_0369	yes.ECA372_II:11316190:A->T_0369	ECA372	0.902226	2955	26549		ECA372_II	II	A	T	347144	4077	10	36	46	C:10	G:36	0.00140552	1.65e-05	C:0.00000004	G:0.00000015	216724	2755	C:10	G:36	0.00180116	2.29e-05	C:0.00000008	G:0.00000030	0.0116081	351221	yes	yes	yes	yes
ECA372_III:11364415:T->A_1258	yes.ECA372_III:11364415:T->A_1258	ECA372	0.902226	2955	26549		ECA372_III	III	T	A	726752	10560	77	55	132	C:77	G:55	0.00294247	4.28e-05	C:0.00000031	G:0.00000022	346212	6232	C:77	G:55	0.00287731	5.18e-05	C:0.00000064	G:0.00000046	0.0143223	737312	yes	yes	yes	yes
ECA372_IV:2045158:T->C_1388	no.ECA372_IV:2045158:T->C_1388	ECA372	0.902226	2955	26549		ECA372_IV	IV	T	C	6783023	709705	7130	21398	28528	A:7130	G:21398	0.0274631	0.00287345	A:0.00002887	G:0.00008664	1465272	260201	A:4086	G:10600	0.0121776	0.00216249	A:0.00003396	G:0.00008809	0.0947192	7492728	no	no	no	no
ECA396_I:3015432:A->G_2360	yes.ECA396_I:3015432:A->G_2360	ECA396	0.791834	46537	183135	4	ECA396_I	I	A	G	896497	9911	291	207	498	C:291	T:207	0.00362974	4.01e-05	C:0.00000118	T:0.00000084	430112	5931	C:291	T:207	0.00357459	4.93e-05	C:0.00000242	T:0.00000172	0.0109344	906408	yes	yes	yes	yes
ECA396_II:13495597:A->T_10714	yes.ECA396_II:13495597:A->T_10714	ECA396	0.791834	46537	183135		ECA396_II	II	A	T	102779	1342	2	11	13	C:2	G:11	0.00041613	5.43e-06	C:0.00000001	G:0.00000004	64747	885	C:2	G:11	0.0005381	7.36e-06	C:0.00000002	G:0.00000009	0.0128889	104121	yes	yes	yes	yes
ECA396_III:10621403:A->T_15513	yes.ECA396_III:10621403:A->T_15513	ECA396	0.791834	46537	183135		ECA396_III	III	A	T	325800	2945	19	47	66	C:19	G:47	0.0013191	1.19e-05	C:0.00000008	G:0.00000019	186935	1872	C:19	G:47	0.00155359	1.56e-05	C:0.00000016	G:0.00000039	0.00895831	328745	yes	yes	yes	yes
ECA396_IV:1970902:T->G_19550	yes.ECA396_IV:1970902:T->G_19550	ECA396	0.791834	46537	183135		ECA396_IV	IV	T	G	279852	3052	29	23	52	A:29	C:23	0.00113306	1.24e-05	A:0.00000012	C:0.00000009	158283	1853	A:29	C:23	0.00131546	1.54e-05	A:0.00000024	C:0.00000019	0.0107881	282904	yes	yes	yes	yes
ED3017_II:7097200:A->G_0150	yes.ED3017_II:7097200:A->G_0150	ED3017	0.94225	294	451	4	ED3017_II	II	A	G	59826	366	4	1	5	C:4	T:1	0.00024222	1.48e-06	C:0.00000002	T:0.00000000	48782	314	C:4	T:1	0.00040542	2.61e-06	C:0.00000003	T:0.00000001	0.00608054	60192	yes	yes	yes	yes
ED3017_III:6807400:C->T_0264	yes.ED3017_III:6807400:C->T_0264	ED3017	0.94225	294	451		ED3017_III	III	C	T	104414	548	50	2	52	A:50	G:2	0.00042275	2.22e-06	A:0.00000020	G:0.00000001	75275	422	A:44	G:2	0.0006256	3.51e-06	A:0.00000037	G:0.00000002	0.00522094	104962	yes	yes	yes	yes
ED3017_V:1262829:A->G_0389	yes.ED3017_V:1262829:A->G_0389	ED3017	0.94225	294	451		ED3017_V	V	A	G	271927	2537	29	29	58	C:29	T:29	0.00110098	1.03e-05	C:0.00000012	T:0.00000012	172683	1779	C:29	T:28	0.00143514	1.48e-05	C:0.00000024	T:0.00000023	0.00924347	274464	yes	yes	yes	yes
ED3017_X:11778002:A->G_0598	yes.ED3017_X:11778002:A->G_0598	ED3017	0.94225	294	451		ED3017_X	X	A	G	474091	4588	23	21	44	C:23	T:21	0.0019195	1.86e-05	C:0.00000009	T:0.00000009	274526	2997	C:23	T:19	0.00228154	2.49e-05	C:0.00000019	T:0.00000016	0.00958471	478679	yes	yes	yes	yes
ED3049_I:12027316:C->T_0038	yes.ED3049_I:12027316:C->T_0038	ED3049	0.926391	119	9715	3	ED3049_I	I	C	T	1194683	33232	902	214	1116	A:902	G:214	0.00483703	0.00013455	A:0.00000365	G:0.00000087	450266	14131	A:761	G:212	0.00374209	0.00011744	A:0.00000632	G:0.00000176	0.0270638	1227915	yes	yes	yes	yes
ED3049_II:3204961:G->A_0083	no.ED3049_II:3204961:G->A_0083	ED3049	0.926391	119	9715		ED3049_II	II	G	A	65322	51	13	44	57	C:13	T:44	0.00026448	2.1e-07	C:0.00000005	T:0.00000018	37852	45	C:13	T:42	0.00031458	3.7e-07	C:0.00000011	T:0.00000035	0.000780139	65373	no	yes	yes	no
ED3049_III:11014743:C->T_0123	yes.ED3049_III:11014743:C->T_0123	ED3049	0.926391	119	9715		ED3049_III	III	C	T	83291	991	63	4	67	A:63	G:4	0.00033723	4.01e-06	A:0.00000026	G:0.00000002	53000	662	A:56	G:4	0.00044047	5.5e-06	A:0.00000047	G:0.00000003	0.0117581	84282	yes	yes	yes	yes
ED3049_X:16679324:T->A_0225	yes.ED3049_X:16679324:T->A_0225	ED3049	0.926391	119	9715		ED3049_X	X	T	A	1153732	14305	118	119	237	C:118	G:119	0.00467123	5.79e-05	C:0.00000048	G:0.00000048	530971	8246	C:116	G:119	0.00441281	6.85e-05	C:0.00000096	G:0.00000099	0.012247	1168037	yes	yes	yes	yes
ED3052_I:7194841:C->T_0050	yes.ED3052_I:7194841:C->T_0050	ED3052	0.932782	636	1899	4	ED3052_I	I	C	T	979138	4471	693	78	771	A:693	G:78	0.00396433	1.81e-05	A:0.00000281	G:0.00000032	477615	2784	A:503	G:78	0.00396938	2.31e-05	A:0.00000418	G:0.00000065	0.00454551	983609	yes	yes	yes	yes
ED3052_IV:2165510:T->A_0315	yes.ED3052_IV:2165510:T->A_0315	ED3052	0.932782	636	1899		ED3052_IV	IV	T	A	588011	3037	49	28	77	C:49	G:28	0.00238074	1.23e-05	C:0.00000020	G:0.00000011	347238	2067	C:49	G:28	0.00288584	1.72e-05	C:0.00000041	G:0.00000023	0.00513833	591048	yes	yes	yes	yes
ED3052_V:20525028:C->A_0538	yes.ED3052_V:20525028:C->A_0538	ED3052	0.932782	636	1899		ED3052_V	V	C	A	842804	5256	24	96	120	G:24	T:96	0.00341234	2.13e-05	G:0.00000010	T:0.00000039	414235	3224	G:24	T:96	0.00344264	2.68e-05	G:0.00000020	T:0.00000080	0.00619767	848060	yes	yes	yes	yes
ED3052_X:8969998:A->C_0604	yes.ED3052_X:8969998:A->C_0604	ED3052	0.932782	636	1899		ED3052_X	X	A	C	1091122	5272	355	211	566	G:355	T:211	0.00441773	2.14e-05	G:0.00000144	T:0.00000085	491546	3045	G:355	T:211	0.00408516	2.53e-05	G:0.00000295	T:0.00000175	0.00480849	1096394	yes	yes	yes	yes
ED3077_I:2393375:A->T_0027	yes.ED3077_I:2393375:A->T_0027	ED3077	0.9305	746	2403	3	ED3077_I	I	A	T	371577	1996	2	42	44	C:2	G:42	0.00150444	8.08e-06	C:0.00000001	G:0.00000017	203584	1219	C:2	G:42	0.00169195	1.01e-05	C:0.00000002	G:0.00000035	0.005343	373573	yes	yes	yes	yes
ED3077_II:5937487:C->G_0195	yes.ED3077_II:5937487:C->G_0195	ED3077	0.9305	746	2403		ED3077_II	II	C	G	377049	1480	206	49	255	A:206	T:49	0.0015266	5.99e-06	A:0.00000083	T:0.00000020	227463	993	A:174	T:48	0.00189041	8.25e-06	A:0.00000145	T:0.00000040	0.00390987	378529	yes	yes	yes	yes
ED3077_IV:16879562:G->A_0482	no.ED3077_IV:16879562:G->A_0482	ED3077	0.9305	746	2403		ED3077_IV	IV	G	A	2086505	15398	603	1527	2130	C:603	T:1527	0.00844784	6.23e-05	C:0.00000244	T:0.00000618	705039	9689	C:603	T:1504	0.00585947	8.05e-05	C:0.00000501	T:0.00001250	0.00732574	2101903	yes	no	yes	no
ED3077_X:8913678:T->C_0771	yes.ED3077_X:8913678:T->C_0771	ED3077	0.9305	746	2403		ED3077_X	X	T	C	355034	1553	131	115	246	A:131	G:115	0.00143746	6.29e-06	A:0.00000053	G:0.00000047	193192	935	A:131	G:114	0.00160559	7.77e-06	A:0.00000109	G:0.00000095	0.00435518	356587	yes	yes	yes	yes
EG4724_II:7136618:G->A_0180	yes.EG4724_II:7136618:G->A_0180	EG4724	0.920312	923	6082	4	EG4724_II	II	G	A	1048907	9924	20	80	100	C:20	T:80	0.00424681	4.02e-05	C:0.00000008	T:0.00000032	459723	5647	C:20	T:76	0.00382068	4.69e-05	C:0.00000017	T:0.00000063	0.0093726	1058831	yes	yes	yes	yes
EG4724_III:10636443:T->C_0370	yes.EG4724_III:10636443:T->C_0370	EG4724	0.920312	923	6082		EG4724_III	III	T	C	862472	8053	199	97	296	A:199	G:97	0.00349198	3.26e-05	A:0.00000081	G:0.00000039	399057	4848	A:194	G:96	0.0033165	4.03e-05	A:0.00000161	G:0.00000080	0.00925074	870525	yes	yes	yes	yes
EG4724_IV:17009681:A->G_0675	yes.EG4724_IV:17009681:A->G_0675	EG4724	0.920312	923	6082		EG4724_IV	IV	A	G	535403	5549	98	55	153	C:98	T:55	0.00216774	2.25e-05	C:0.00000040	T:0.00000022	274318	3113	C:98	T:55	0.00227981	2.59e-05	C:0.00000081	T:0.00000046	0.0102578	540952	yes	yes	yes	yes
EG4724_X:14548706:A->T_0884	yes.EG4724_X:14548706:A->T_0884	EG4724	0.920312	923	6082		EG4724_X	X	A	T	881268	7605	71	129	200	C:71	G:129	0.00356808	3.08e-05	C:0.00000029	G:0.00000052	448671	5032	C:71	G:129	0.00372883	4.18e-05	C:0.00000059	G:0.00000107	0.00855578	888873	yes	yes	yes	yes
EG4725_I:39226:C->A_0001	yes.EG4725_I:39226:C->A_0001	EG4725	0.906716	2194	12202	3	EG4725_I	I	C	A	295067	2437	6	17	23	G:6	T:17	0.00119467	9.87e-06	G:0.00000002	T:0.00000007	167513	1522	G:6	T:17	0.00139217	1.27e-05	G:0.00000005	T:0.00000014	0.00819149	297504	yes	yes	yes	yes
EG4725_II:14784049:A->C_0335	yes.EG4725_II:14784049:A->C_0335	EG4725	0.906716	2194	12202		EG4725_II	II	A	C	204422	1611	81	38	119	G:81	T:38	0.00082766	6.52e-06	G:0.00000033	T:0.00000015	123130	1032	G:81	T:36	0.00102331	8.58e-06	G:0.00000067	T:0.00000030	0.00781914	206033	yes	yes	yes	yes
EG4725_III:12433227:C->A_0601	no.EG4725_III:12433227:C->A_0601	EG4725	0.906716	2194	12202		EG4725_III	III	C	A	369286	65523	105	76	181	G:105	T:76	0.00149516	0.00026529	G:0.00000043	T:0.00000031	178540	39226	G:105	T:76	0.00148382	0.000326	G:0.00000087	T:0.00000063	0.150694	434809	no	yes	yes	no
EG4725_X:13347083:A->T_2067	yes.EG4725_X:13347083:A->T_2067	EG4725	0.906716	2194	12202		EG4725_X	X	A	T	825891	9970	52	84	136	C:52	G:84	0.00334387	4.04e-05	C:0.00000021	G:0.00000034	407479	5923	C:52	G:80	0.00338649	4.92e-05	C:0.00000043	G:0.00000066	0.0119278	835861	yes	yes	yes	yes
GXW1_II:12402155:A->G_0303	yes.GXW1_II:12402155:A->G_0303	GXW1	0.931756	950	4444	4	GXW1_II	II	A	G	653288	3762	18	40	58	C:18	T:40	0.00264503	1.52e-05	C:0.00000007	T:0.00000016	373300	2425	C:18	T:37	0.00310244	2.02e-05	C:0.00000015	T:0.00000031	0.00572559	657050	yes	yes	yes	yes
GXW1_III:2725552:G->A_0397	yes.GXW1_III:2725552:G->A_0397	GXW1	0.931756	950	4444		GXW1_III	III	G	A	1018059	4873	21	109	130	C:21	T:109	0.00412192	1.97e-05	C:0.00000009	T:0.00000044	507576	2943	C:21	T:108	0.00421838	2.45e-05	C:0.00000017	T:0.00000090	0.00476376	1022932	yes	yes	yes	yes
GXW1_V:18684493:A->G_0830	yes.GXW1_V:18684493:A->G_0830	GXW1	0.931756	950	4444		GXW1_V	V	A	G	683753	3853	49	67	116	C:49	T:67	0.00276838	1.56e-05	C:0.00000020	T:0.00000027	352673	2298	C:49	T:67	0.00293101	1.91e-05	C:0.00000041	T:0.00000056	0.0056035	687606	yes	yes	yes	yes
GXW1_X:12028861:C->T_0941	yes.GXW1_X:12028861:C->T_0941	GXW1	0.931756	950	4444		GXW1_X	X	C	T	662632	2870	357	20	377	A:357	G:20	0.00268286	1.16e-05	A:0.00000145	G:0.00000008	356007	1845	A:276	G:20	0.00295872	1.53e-05	A:0.00000229	G:0.00000017	0.00431253	665502	yes	yes	yes	yes
JU1212_I:11540544:C->G_0174	yes.JU1212_I:11540544:C->G_0174	JU1212	0.917488	685	5965	4	JU1212_I	I	C	G	137717	572	43	12	55	A:43	T:12	0.00055759	2.32e-06	A:0.00000017	T:0.00000005	85971	386	A:39	T:12	0.00071449	3.21e-06	A:0.00000032	T:0.00000010	0.00413627	138289	yes	yes	yes	yes
JU1212_II:10563991:T->C_0567	yes.JU1212_II:10563991:T->C_0567	JU1212	0.917488	685	5965		JU1212_II	II	T	C	691378	4642	117	52	169	A:117	G:52	0.00279925	1.88e-05	A:0.00000047	G:0.00000021	391143	2830	A:117	G:52	0.00325073	2.35e-05	A:0.00000097	G:0.00000043	0.00666935	696020	yes	yes	yes	yes
JU1212_III:8737128:A->T_0615	yes.JU1212_III:8737128:A->T_0615	JU1212	0.917488	685	5965		JU1212_III	III	A	T	607064	3976	118	218	336	C:118	G:218	0.00245788	1.61e-05	C:0.00000048	G:0.00000088	339230	2557	C:118	G:217	0.00281929	2.13e-05	C:0.00000098	G:0.00000180	0.00650694	611040	yes	yes	yes	yes
JU1212_V:9120137:A->C_0768	yes.JU1212_V:9120137:A->C_0768	JU1212	0.917488	685	5965		JU1212_V	V	A	C	964800	5822	267	143	410	G:267	T:143	0.00390628	2.36e-05	G:0.00000108	T:0.00000058	484019	3596	G:266	T:142	0.0040226	2.99e-05	G:0.00000221	T:0.00000118	0.00599822	970622	yes	yes	yes	yes
JU1400_I:2752711:A->G_0030	yes.JU1400_I:2752711:A->G_0030	JU1400	0.916768	1335	10292	4	JU1400_I	I	A	G	449912	2663	5	15	20	C:5	T:15	0.0018216	1.08e-05	C:0.00000002	T:0.00000006	220717	1484	C:5	T:15	0.00183434	1.23e-05	C:0.00000004	T:0.00000012	0.00588411	452575	yes	yes	yes	yes
JU1400_II:4073439:A->T_0295	yes.JU1400_II:4073439:A->T_0295	JU1400	0.916768	1335	10292		JU1400_II	II	A	T	648359	3165	112	213	325	C:112	G:213	0.00262508	1.28e-05	C:0.00000045	G:0.00000086	326459	2010	C:112	G:209	0.00271315	1.67e-05	C:0.00000093	G:0.00000174	0.00485784	651524	yes	yes	yes	yes
JU1400_III:11372974:C->T_0900	yes.JU1400_III:11372974:C->T_0900	JU1400	0.916768	1335	10292		JU1400_III	III	C	T	842289	4103	519	42	561	A:519	G:42	0.00341026	1.66e-05	A:0.00000210	G:0.00000017	382206	2297	A:398	G:40	0.00317645	1.91e-05	A:0.00000331	G:0.00000033	0.00484764	846392	yes	yes	yes	yes
JU1400_X:2853367:T->A_1277	yes.JU1400_X:2853367:T->A_1277	JU1400	0.916768	1335	10292		JU1400_X	X	T	A	265290	2575	53	63	116	C:53	G:63	0.00107411	1.04e-05	C:0.00000021	G:0.00000026	157355	1632	C:52	G:63	0.00130775	1.36e-05	C:0.00000043	G:0.00000052	0.00961305	267865	yes	yes	yes	yes
JU1581_I:8999758:C->T_0517	yes.JU1581_I:8999758:C->T_0517	JU1581	0.925906	1239	8350	4	JU1581_I	I	C	T	260043	2578	212	15	227	A:212	G:15	0.00105286	1.04e-05	A:0.00000086	G:0.00000006	172145	1814	A:185	G:15	0.00143067	1.51e-05	A:0.00000154	G:0.00000012	0.00981643	262621	yes	yes	yes	yes
JU1581_II:11292203:G->A_0721	yes.JU1581_II:11292203:G->A_0721	JU1581	0.925906	1239	8350		JU1581_II	II	G	A	285352	2545	25	216	241	C:25	T:216	0.00115533	1.03e-05	C:0.00000010	T:0.00000087	175013	1663	C:25	T:192	0.0014545	1.38e-05	C:0.00000021	T:0.00000160	0.00883997	287897	yes	yes	yes	yes
JU1581_V:18309531:C->T_0943	yes.JU1581_V:18309531:C->T_0943	JU1581	0.925906	1239	8350		JU1581_V	V	C	T	722125	8109	335	20	355	A:335	G:20	0.00292374	3.28e-05	A:0.00000136	G:0.00000008	385149	4951	A:278	G:20	0.00320091	4.12e-05	A:0.00000231	G:0.00000017	0.0111047	730234	yes	yes	yes	yes
JU1581_X:15153830:C->T_1083	yes.JU1581_X:15153830:C->T_1083	JU1581	0.925906	1239	8350		JU1581_X	X	C	T	254580	1871	126	21	147	A:126	G:21	0.00103074	7.58e-06	A:0.00000051	G:0.00000009	156043	1235	A:121	G:18	0.00129685	1.03e-05	A:0.00000101	G:0.00000015	0.00729574	256451	yes	yes	yes	yes
JU1652_I:8786203:C->G_0049	yes.JU1652_I:8786203:C->G_0049	JU1652	0.927945	844	6065	3	JU1652_I	I	C	G	212038	1316	83	17	100	A:83	T:17	0.0008585	5.33e-06	A:0.00000034	T:0.00000007	131263	888	A:79	T:17	0.00109091	7.38e-06	A:0.00000066	T:0.00000014	0.00616815	213354	yes	yes	yes	yes
JU1652_III:12677731:C->T,G_1197	no.JU1652_III:12677731:C->T,G_1197	JU1652	0.927945	844	6065		JU1652_III	III	C	T	498012	21030	168	15	183	A:168	G:15	0.00201635	8.52e-05	A:0.00000068	G:0.00000006	256144	12288	A:133	G:15	0.00212877	0.00010212	A:0.00000111	G:0.00000012	0.040517	519042	no	yes	yes	no
JU1652_IV:13210351:G->C_1309	yes.JU1652_IV:13210351:G->C_1309	JU1652	0.927945	844	6065		JU1652_IV	IV	G	C	399392	3154	144	152	296	A:144	T:152	0.00161706	1.28e-05	A:0.00000058	T:0.00000062	216847	1863	A:132	T:147	0.00180218	1.55e-05	A:0.00000110	T:0.00000122	0.00783513	402546	yes	yes	yes	yes
JU1652_V:10767051:G->A_1404	yes.JU1652_V:10767051:G->A_1404	JU1652	0.927945	844	6065		JU1652_V	V	G	A	778681	6522	52	89	141	C:52	T:89	0.00315272	2.64e-05	C:0.00000021	T:0.00000036	385157	3741	C:44	T:81	0.00320098	3.11e-05	C:0.00000037	T:0.00000067	0.00830613	785203	yes	yes	yes	yes
JU1793_II:2945994:C->T_0041	yes.JU1793_II:2945994:C->T_0041	JU1793	0.904338	926	10733	2	JU1793_II	II	C	T	471738	5421	242	22	264	A:242	G:22	0.00190997	2.2e-05	A:0.00000098	G:0.00000009	262082	3384	A:183	G:22	0.00217812	2.81e-05	A:0.00000152	G:0.00000018	0.011361	477159	yes	yes	yes	yes
JU1793_II:3806941:A->G_0047	yes.JU1793_II:3806941:A->G_0047	JU1793	0.904338	926	10733		JU1793_II	II	A	G	467575	5453	56	48	104	C:56	T:48	0.00189312	2.21e-05	C:0.00000023	T:0.00000019	264474	3511	C:56	T:48	0.002198	2.92e-05	C:0.00000047	T:0.00000040	0.0115279	473028	yes	yes	yes	yes
JU1793_V:1692047:T->C_0236	no.JU1793_V:1692047:T->C_0236	JU1793	0.904338	926	10733		JU1793_V	V	T	C	188784	278	19	4	23	A:19	G:4	0.00076435	1.13e-06	A:0.00000008	G:0.00000002	113234	137	A:19	G:4	0.00094107	1.14e-06	A:0.00000016	G:0.00000003	0.00147042	189062	no	yes	yes	no
JU1793_V:4157532:G->C,A_0307	no.JU1793_V:4157532:G->C,A_0307	JU1793	0.904338	926	10733		JU1793_V	V	G	C	196194	136	370	398	768	A:370	T:398	0.00079435	5.5e-07	A:0.00000150	T:0.00000161	125154	136	A:366	T:397	0.00104013	1.13e-06	A:0.00000304	T:0.00000330	0.000692711	196330	no	yes	yes	no
JU1896_I:5502853:G->A_0065	yes.JU1896_I:5502853:G->A_0065	JU1896	0.920033	1277	10545	3	JU1896_I	I	G	A	646616	3155	7	45	52	C:7	T:45	0.00261802	1.28e-05	C:0.00000003	T:0.00000018	342499	2031	C:7	T:45	0.00284645	1.69e-05	C:0.00000006	T:0.00000037	0.00485556	649771	yes	yes	yes	yes
JU1896_II:4600308:A->T_0489	yes.JU1896_II:4600308:A->T_0489	JU1896	0.920033	1277	10545		JU1896_II	II	A	T	205951	1045	66	76	142	C:66	G:76	0.00083385	4.23e-06	C:0.00000027	G:0.00000031	116602	624	C:66	G:76	0.00096906	5.19e-06	C:0.00000055	G:0.00000063	0.00504841	206996	yes	yes	yes	yes
JU1896_IV:13794865:A->G_0782	yes.JU1896_IV:13794865:A->G_0782	JU1896	0.920033	1277	10545		JU1896_IV	IV	A	G	813681	3401	56	75	131	C:56	T:75	0.00329443	1.38e-05	C:0.00000023	T:0.00000030	435156	2185	C:56	T:75	0.00361651	1.82e-05	C:0.00000047	T:0.00000062	0.00416237	817082	yes	yes	yes	yes
JU1896_V:10431734:T->C_0892	no.JU1896_V:10431734:T->C_0892	JU1896	0.920033	1277	10545		JU1896_V	V	T	C	220506	50	21	15	36	A:21	G:15	0.00089278	2e-07	A:0.00000009	G:0.00000006	128865	47	A:21	G:15	0.00107098	3.9e-07	A:0.00000017	G:0.00000012	0.0002267	220556	no	yes	yes	no
JU2001_I:14297638:A->T_0187	yes.JU2001_I:14297638:A->T_0187	JU2001	0.915508	4212	11624	4	JU2001_I	I	A	T	466462	4428	36	68	104	C:36	G:68	0.00188861	1.79e-05	C:0.00000015	G:0.00000028	264008	2825	C:36	G:68	0.00219413	2.35e-05	C:0.00000030	G:0.00000057	0.00940347	470890	yes	yes	yes	yes
JU2001_II:308380:T->C_0291	yes.JU2001_II:308380:T->C_0291	JU2001	0.915508	4212	11624		JU2001_II	II	T	C	1185500	6576	163	78	241	A:163	G:78	0.00479985	2.66e-05	A:0.00000066	G:0.00000032	570667	3991	A:163	G:78	0.00474272	3.32e-05	A:0.00000135	G:0.00000065	0.00551643	1192076	yes	yes	yes	yes
JU2001_V:15526581:G->A_2950	yes.JU2001_V:15526581:G->A_2950	JU2001	0.915508	4212	11624		JU2001_V	V	G	A	312702	3723	61	129	190	C:61	T:129	0.00126607	1.51e-05	C:0.00000025	T:0.00000052	181072	2319	C:61	T:129	0.00150486	1.93e-05	C:0.00000051	T:0.00000107	0.0117658	316425	yes	yes	yes	yes
JU2001_X:9040599:A->T_3337	yes.JU2001_X:9040599:A->T_3337	JU2001	0.915508	4212	11624		JU2001_X	X	A	T	1094160	7899	56	121	177	C:56	G:121	0.00443003	3.2e-05	C:0.00000023	G:0.00000049	542845	4901	C:56	G:121	0.0045115	4.07e-05	C:0.00000047	G:0.00000101	0.00716749	1102059	yes	yes	yes	yes
JU2007_I:5430397:C->T_0248	yes.JU2007_I:5430397:C->T_0248	JU2007	0.93324	1131	4419	4	JU2007_I	I	C	T	893060	2875	544	41	585	A:544	G:41	0.00361582	1.16e-05	A:0.00000220	G:0.00000017	456351	1842	A:447	G:41	0.00379266	1.53e-05	A:0.00000371	G:0.00000034	0.00320894	895935	yes	yes	yes	yes
JU2007_II:12372731:C->T_0541	yes.JU2007_II:12372731:C->T_0541	JU2007	0.93324	1131	4419		JU2007_II	II	C	T	606426	2297	261	27	288	A:261	G:27	0.0024553	9.3e-06	A:0.00000106	G:0.00000011	346973	1527	A:219	G:22	0.00288364	1.27e-05	A:0.00000182	G:0.00000018	0.00377347	608723	yes	yes	yes	yes
JU2007_III:11370145:T->C_0695	yes.JU2007_III:11370145:T->C_0695	JU2007	0.93324	1131	4419		JU2007_III	III	T	C	287850	1249	104	69	173	A:104	G:69	0.00116545	5.06e-06	A:0.00000042	G:0.00000028	169638	805	A:103	G:69	0.00140983	6.69e-06	A:0.00000086	G:0.00000057	0.00432032	289099	yes	yes	yes	yes
JU2007_IV:1822603:G->C_0728	yes.JU2007_IV:1822603:G->C_0728	JU2007	0.93324	1131	4419		JU2007_IV	IV	G	C	231756	952	571	497	1068	A:571	T:497	0.00093833	3.85e-06	A:0.00000231	T:0.00000201	142686	677	A:568	T:495	0.00118584	5.63e-06	A:0.00000472	T:0.00000411	0.00409096	232708	yes	yes	yes	yes
JU2017_I:13367225:T->C_0323	yes.JU2017_I:13367225:T->C_0323	JU2017	0.924224	2730	12103	3	JU2017_I	I	T	C	261550	2559	49	30	79	A:49	G:30	0.00105896	1.04e-05	A:0.00000020	G:0.00000012	165004	1781	A:48	G:30	0.00137132	1.48e-05	A:0.00000040	G:0.00000025	0.00968918	264109	yes	yes	yes	yes
JU2017_II:12879814:C->A_1173	yes.JU2017_II:12879814:C->A_1173	JU2017	0.924224	2730	12103		JU2017_II	II	C	A	716646	7906	35	105	140	G:35	T:105	0.00290156	3.2e-05	G:0.00000014	T:0.00000043	359846	4907	G:33	T:94	0.00299062	4.08e-05	G:0.00000027	T:0.00000078	0.0109116	724552	yes	yes	yes	yes
JU2017_IV:2981713:A->G_1419	no.JU2017_IV:2981713:A->G_1419	JU2017	0.924224	2730	12103		JU2017_IV	IV	A	G	341920	254	13	58	71	C:13	T:58	0.00138437	1.03e-06	C:0.00000005	T:0.00000023	204391	205	C:13	T:58	0.00169866	1.7e-06	C:0.00000011	T:0.00000048	0.000742312	342174	no	yes	yes	no
JU2017_V:1425052:C->G_2539	yes.JU2017_V:1425052:C->G_2539	JU2017	0.924224	2730	12103		JU2017_V	V	C	G	771323	6920	394	117	511	A:394	T:117	0.00312293	2.8e-05	A:0.00000160	T:0.00000047	372634	4126	A:327	T:117	0.0030969	3.43e-05	A:0.00000272	T:0.00000097	0.00889182	778243	yes	yes	yes	yes
JU2106_II:10765509:T->C_0145	yes.JU2106_II:10765509:T->C_0145	JU2106	0.910957	544	5693	4	JU2106_II	II	T	C	1043954	11951	121	153	274	A:121	G:153	0.00422676	4.84e-05	A:0.00000049	G:0.00000062	530787	7671	A:121	G:152	0.00441129	6.38e-05	A:0.00000101	G:0.00000126	0.0113183	1055905	yes	yes	yes	yes
JU2106_IV:5547022:A->G_0289	yes.JU2106_IV:5547022:A->G_0289	JU2106	0.910957	544	5693		JU2106_IV	IV	A	G	621689	7457	130	124	254	C:130	T:124	0.00251709	3.02e-05	C:0.00000053	T:0.00000050	328881	4619	C:130	T:124	0.00273328	3.84e-05	C:0.00000108	T:0.00000103	0.0118526	629146	yes	yes	yes	yes
JU2106_V:6225292:G->A_0411	yes.JU2106_V:6225292:G->A_0411	JU2106	0.910957	544	5693		JU2106_V	V	G	A	900882	10624	32	161	193	C:32	T:161	0.00364749	4.3e-05	C:0.00000013	T:0.00000065	461530	6541	C:32	T:157	0.0038357	5.44e-05	C:0.00000027	T:0.00000130	0.0116554	911506	yes	yes	yes	yes
JU2106_X:15664829:G->A_0594	yes.JU2106_X:15664829:G->A_0594	JU2106	0.910957	544	5693		JU2106_X	X	G	A	612370	7087	44	513	557	C:44	T:513	0.00247936	2.87e-05	C:0.00000018	T:0.00000208	330353	4545	C:42	T:394	0.00274551	3.78e-05	C:0.00000035	T:0.00000327	0.0114407	619457	yes	yes	yes	yes
JU2234_II:9013382:G->A_0205	yes.JU2234_II:9013382:G->A_0205	JU2234	0.925111	1254	7651	4	JU2234_II	II	G	A	801813	10183	546	372	918	C:546	T:372	0.00324638	4.12e-05	C:0.00000221	T:0.00000151	427893	6481	C:543	T:369	0.00355615	5.39e-05	C:0.00000451	T:0.00000307	0.0125407	811996	yes	yes	yes	yes
JU2234_III:6140046:A->C_0341	yes.JU2234_III:6140046:A->C_0341	JU2234	0.925111	1254	7651		JU2234_III	III	A	C	386622	4619	64	23	87	G:64	T:23	0.00156535	1.87e-05	G:0.00000026	T:0.00000009	212298	2783	G:64	T:23	0.00176437	2.31e-05	G:0.00000053	T:0.00000019	0.011806	391241	yes	yes	yes	yes
JU2234_IV:12392257:G->A_0927	yes.JU2234_IV:12392257:G->A_0927	JU2234	0.925111	1254	7651		JU2234_IV	IV	G	A	634161	7427	38	139	177	C:38	T:139	0.00256759	3.01e-05	C:0.00000015	T:0.00000056	351490	4694	C:38	T:138	0.00292118	3.9e-05	C:0.00000032	T:0.00000115	0.011576	641588	yes	yes	yes	yes
JU2234_V:10570139:A->C_1109	yes.JU2234_V:10570139:A->C_1109	JU2234	0.925111	1254	7651		JU2234_V	V	A	C	932857	10460	361	240	601	G:361	T:240	0.00377695	4.24e-05	G:0.00000146	T:0.00000097	506863	6910	G:360	T:239	0.00421246	5.74e-05	G:0.00000299	T:0.00000199	0.0110885	943317	yes	yes	yes	yes
JU2316_I:3851925:C->A_0010	no.JU2316_I:3851925:C->A_0010	JU2316	0.885068	944	33010	2	JU2316_I	I	C	A	2434600	9174	139	387	526	G:139	T:387	0.00985721	3.71e-05	G:0.00000056	T:0.00000157	970689	5939	G:134	T:364	0.00806724	4.94e-05	G:0.00000111	T:0.00000303	0.00375403	2443774	yes	no	yes	no
JU2316_II:11100616:G->A_0131	yes.JU2316_II:11100616:G->A_0131	JU2316	0.885068	944	33010		JU2316_II	II	G	A	154826	2072	1	5	6	C:1	T:5	0.00062686	8.39e-06	C:0.00000000	T:0.00000002	106423	1612	C:1	T:5	0.00088446	1.34e-05	C:0.00000001	T:0.00000004	0.013206	156898	yes	yes	yes	yes
JU2316_IV:5088773:G->A_0290	yes.JU2316_IV:5088773:G->A_0290	JU2316	0.885068	944	33010		JU2316_IV	IV	G	A	997257	12878	41	139	180	C:41	T:139	0.00403769	5.21e-05	C:0.00000017	T:0.00000056	510220	8007	C:37	T:129	0.00424036	6.65e-05	C:0.00000031	T:0.00000107	0.0127488	1010135	yes	yes	yes	yes
JU2316_V:3840034:C->T,A_0362	no.JU2316_V:3840034:C->T,A_0362	JU2316	0.885068	944	33010		JU2316_V	V	C	T	667232	47	330	22	352	A:330	G:22	0.00270149	1.9e-07	A:0.00000134	G:0.00000009	370078	47	A:259	G:22	0.00307566	3.9e-07	A:0.00000215	G:0.00000018	7.04e-05	667279	no	yes	yes	no
JU2464_I:1598538:G->A_0017	yes.JU2464_I:1598538:G->A_0017	JU2464	0.93042	1062	6832	3	JU2464_I	I	G	A	508317	8739	15	36	51	C:15	T:36	0.00205807	3.54e-05	C:0.00000006	T:0.00000015	280940	5568	C:15	T:33	0.00233485	4.63e-05	C:0.00000012	T:0.00000027	0.0169015	517056	yes	yes	yes	yes
JU2464_II:12957380:A->C_0289	yes.JU2464_II:12957380:A->C_0289	JU2464	0.93042	1062	6832		JU2464_II	II	A	C	811021	16366	91	51	142	G:91	T:51	0.00328366	6.63e-05	G:0.00000037	T:0.00000021	398776	9566	G:87	T:51	0.00331416	7.95e-05	G:0.00000072	T:0.00000042	0.0197803	827387	yes	yes	yes	yes
JU2464_IV:13198821:G->A_0670	yes.JU2464_IV:13198821:G->A_0670	JU2464	0.93042	1062	6832		JU2464_IV	IV	G	A	248604	6074	4	117	121	C:4	T:117	0.00100655	2.46e-05	C:0.00000002	T:0.00000047	141971	3621	C:4	T:85	0.0011799	3.01e-05	C:0.00000003	T:0.00000071	0.0238497	254678	yes	yes	yes	yes
JU2464_X:12380030:T->C_1030	no.JU2464_X:12380030:T->C_1030	JU2464	0.93042	1062	6832		JU2464_X	X	T	C	15	3	40	14	54	A:40	G:14	6e-08	1e-08	A:0.00000016	G:0.00000006	15	3	A:40	G:14	1.2e-07	2e-08	A:0.00000033	G:0.00000012	0.166667	18	no	no	yes	no
JU2519_II:4871040:T->G_0048	yes.JU2519_II:4871040:T->G_0048	JU2519	0.907521	286	14677	3	JU2519_II	II	T	G	550219	9259	256	121	377	A:256	C:121	0.00222773	3.75e-05	A:0.00000104	C:0.00000049	302226	5753	A:256	C:119	0.00251175	4.78e-05	A:0.00000213	C:0.00000099	0.0165494	559478	yes	yes	yes	yes
JU2519_III:2764480:T->A_0077	no.JU2519_III:2764480:T->A_0077	JU2519	0.907521	286	14677		JU2519_III	III	T	A	151576	53	44	27	71	C:44	G:27	0.0006137	2.1e-07	C:0.00000018	G:0.00000011	87141	53	C:44	G:27	0.00072421	4.4e-07	C:0.00000037	G:0.00000022	0.000349537	151629	no	yes	yes	no
JU2519_IV:13333113:C->T_0115	yes.JU2519_IV:13333113:C->T_0115	JU2519	0.907521	286	14677		JU2519_IV	IV	C	T	451239	12021	197	28	225	A:197	G:28	0.00182698	4.87e-05	A:0.00000080	G:0.00000011	240975	7268	A:196	G:28	0.0020027	6.04e-05	A:0.00000163	G:0.00000023	0.0259487	463260	yes	yes	yes	yes
JU2519_V:19665014:G->A_0204	yes.JU2519_V:19665014:G->A_0204	JU2519	0.907521	286	14677		JU2519_V	V	G	A	405986	12352	11	58	69	C:11	T:58	0.00164376	5e-05	C:0.00000004	T:0.00000023	213366	7111	C:11	T:56	0.00177325	5.91e-05	C:0.00000009	T:0.00000047	0.0295264	418338	yes	yes	yes	yes
JU2526_II:13167927:G->T_0162	yes.JU2526_II:13167927:G->T_0162	JU2526	0.881556	465	35170	4	JU2526_II	II	G	T	358339	11106	75	77	152	A:75	C:77	0.00145084	4.5e-05	A:0.00000030	C:0.00000031	221252	7521	A:70	C:77	0.00183879	6.25e-05	A:0.00000058	C:0.00000064	0.0300613	369445	yes	yes	yes	yes
JU2526_II:13240732:C->A_0163	yes.JU2526_II:13240732:C->A_0163	JU2526	0.881556	465	35170		JU2526_II	II	C	A	569566	16699	14	70	84	G:14	T:70	0.00230606	6.76e-05	G:0.00000006	T:0.00000028	322375	10814	G:14	T:70	0.00267921	8.99e-05	G:0.00000012	T:0.00000058	0.0284837	586265	yes	yes	yes	yes
JU2526_IV:11940715:G->A_0354	yes.JU2526_IV:11940715:G->A_0354	JU2526	0.881556	465	35170		JU2526_IV	IV	G	A	1004915	21677	51	513	564	C:51	T:513	0.0040687	8.78e-05	C:0.00000021	T:0.00000208	516635	13598	C:51	T:421	0.00429367	0.00011301	C:0.00000042	T:0.00000350	0.0211155	1026592	yes	yes	yes	yes
JU2526_IV:4688328:T->G_0289	yes.JU2526_IV:4688328:T->G_0289	JU2526	0.881556	465	35170		JU2526_IV	IV	T	G	681726	16418	140	206	346	A:140	C:206	0.00276017	6.65e-05	A:0.00000057	C:0.00000083	353791	10295	A:140	C:206	0.0029403	8.56e-05	A:0.00000116	C:0.00000171	0.0235166	698144	yes	yes	yes	yes
JU2576_I:516916:G->T_0172	yes.JU2576_I:516916:G->T_0172	JU2576	0.924478	1530	11256	3	JU2576_I	I	G	T	347674	4669	92	7	99	A:92	C:7	0.00140766	1.89e-05	A:0.00000037	C:0.00000003	213303	3073	A:89	C:7	0.00177273	2.55e-05	A:0.00000074	C:0.00000006	0.0132513	352343	yes	yes	yes	yes
JU2576_II:756586:T->A_0471	yes.JU2576_II:756586:T->A_0471	JU2576	0.924478	1530	11256		JU2576_II	II	T	A	165953	5049	22	26	48	C:22	G:26	0.00067191	2.04e-05	C:0.00000009	G:0.00000011	100222	3567	C:22	G:26	0.00083293	2.96e-05	C:0.00000018	G:0.00000022	0.029526	171002	yes	yes	yes	yes
JU2576_IV:7907569:T->A_0781	yes.JU2576_IV:7907569:T->A_0781	JU2576	0.924478	1530	11256		JU2576_IV	IV	T	A	794061	11643	89	105	194	C:89	G:105	0.00321499	4.71e-05	C:0.00000036	G:0.00000043	414420	7365	C:89	G:105	0.00344418	6.12e-05	C:0.00000074	G:0.00000087	0.0144507	805704	yes	yes	yes	yes
JU2576_V:779685:A->C_1089	no.JU2576_V:779685:A->C_1089	JU2576	0.924478	1530	11256		JU2576_V	V	A	C	1007881	91	188	105	293	G:188	T:105	0.00408071	3.7e-07	G:0.00000076	T:0.00000043	505690	91	G:188	T:105	0.00420271	7.6e-07	G:0.00000156	T:0.00000087	9.03e-05	1007972	no	yes	yes	no
JU258_I:3628582:A->G_0312	yes.JU258_I:3628582:A->G_0312	JU258	0.906521	2236	16382	4	JU258_I	I	A	G	470712	4655	29	47	76	C:29	T:47	0.00190582	1.89e-05	C:0.00000012	T:0.00000019	247549	2876	C:27	T:47	0.00205734	2.39e-05	C:0.00000022	T:0.00000039	0.00979243	475367	yes	yes	yes	yes
JU258_IV:652672:G->A_1698	yes.JU258_IV:652672:G->A_1698	JU258	0.906521	2236	16382		JU258_IV	IV	G	A	472675	5066	16	70	86	C:16	T:70	0.00191377	2.05e-05	C:0.00000006	T:0.00000028	261731	3066	C:16	T:69	0.0021752	2.55e-05	C:0.00000013	T:0.00000057	0.0106041	477741	yes	yes	yes	yes
JU258_V:17066639:C->G_2584	yes.JU258_V:17066639:C->G_2584	JU258	0.906521	2236	16382		JU258_V	V	C	G	290957	3678	33	34	67	A:33	T:34	0.00117803	1.49e-05	A:0.00000013	T:0.00000014	155191	2193	A:31	T:34	0.00128977	1.82e-05	A:0.00000026	T:0.00000028	0.0124832	294635	yes	yes	yes	yes
JU258_X:4359787:C->T_3220	yes.JU258_X:4359787:C->T_3220	JU258	0.906521	2236	16382		JU258_X	X	C	T	206797	2902	70	7	77	A:70	G:7	0.00083728	1.18e-05	A:0.00000028	G:0.00000003	126760	1904	A:60	G:7	0.00105348	1.58e-05	A:0.00000050	G:0.00000006	0.0138389	209699	yes	yes	yes	yes
JU2592_III:8886711:T->A_0192	yes.JU2592_III:8886711:T->A_0192	JU2592	0.930055	1007	2925	4	JU2592_III	III	T	A	949789	11964	90	122	212	C:90	G:122	0.0038455	4.84e-05	C:0.00000036	G:0.00000049	468541	7455	C:90	G:122	0.00389397	6.2e-05	C:0.00000075	G:0.00000101	0.0124398	961753	yes	yes	yes	yes
JU2592_IV:729788:G->A_0217	yes.JU2592_IV:729788:G->A_0217	JU2592	0.930055	1007	2925		JU2592_IV	IV	G	A	795205	9414	37	112	149	C:37	T:112	0.00321962	3.81e-05	C:0.00000015	T:0.00000045	425805	5991	C:37	T:110	0.0035388	4.98e-05	C:0.00000031	T:0.00000091	0.0116999	804619	yes	yes	yes	yes
JU2592_V:4412571:A->T_0335	yes.JU2592_V:4412571:A->T_0335	JU2592	0.930055	1007	2925		JU2592_V	V	A	T	497364	7212	109	73	182	C:109	G:73	0.00201373	2.92e-05	C:0.00000044	G:0.00000030	257830	4318	C:109	G:73	0.00214278	3.59e-05	C:0.00000091	G:0.00000061	0.0142932	504576	yes	yes	yes	yes
JU2592_V:6989882:C->T_0522	yes.JU2592_V:6989882:C->T_0522	JU2592	0.930055	1007	2925		JU2592_V	V	C	T	917125	12630	1546	40	1586	A:1546	G:40	0.00371325	5.11e-05	A:0.00000626	G:0.00000016	416408	7239	A:1319	G:39	0.0034607	6.02e-05	A:0.00001096	G:0.00000032	0.0135842	929755	yes	yes	yes	yes
JU2593_II:12072122:G->A_0087	yes.JU2593_II:12072122:G->A_0087	JU2593	0.924567	351	9356	3	JU2593_II	II	G	A	644586	10073	15	61	76	C:15	T:61	0.0026098	4.08e-05	C:0.00000006	T:0.00000025	337310	6216	C:15	T:61	0.00280333	5.17e-05	C:0.00000012	T:0.00000051	0.0153866	654659	yes	yes	yes	yes
JU2593_IV:8394352:T->A_0197	no.JU2593_IV:8394352:T->A_0197	JU2593	0.924567	351	9356		JU2593_IV	IV	T	A	196929	9315	89	101	190	C:89	G:101	0.00079733	3.77e-05	C:0.00000036	G:0.00000041	130333	6553	C:89	G:101	0.00108318	5.45e-05	C:0.00000074	G:0.00000084	0.045165	206244	no	yes	yes	no
JU2593_V:10908195:A->T_0284	yes.JU2593_V:10908195:A->T_0284	JU2593	0.924567	351	9356		JU2593_V	V	A	T	973240	12739	134	194	328	C:134	G:194	0.00394045	5.16e-05	C:0.00000054	G:0.00000079	517157	8172	C:134	G:193	0.00429801	6.79e-05	C:0.00000111	G:0.00000160	0.0129202	985979	yes	yes	yes	yes
JU2593_X:9373342:G->A_0374	yes.JU2593_X:9373342:G->A_0374	JU2593	0.924567	351	9356		JU2593_X	X	G	A	834335	12210	25	117	142	C:25	T:117	0.00337805	4.94e-05	C:0.00000010	T:0.00000047	407077	7305	C:25	T:109	0.00338315	6.07e-05	C:0.00000021	T:0.00000091	0.0144233	846545	yes	yes	yes	yes
JU2619_I:3268769:G->T_0027	yes.JU2619_I:3268769:G->T_0027	JU2619	0.929477	1443	5627	4	JU2619_I	I	G	T	191099	2354	570	246	816	A:570	C:246	0.00077372	9.53e-06	A:0.00000231	C:0.00000100	111766	1722	A:568	C:246	0.00092887	1.43e-05	A:0.00000472	C:0.00000204	0.0121683	193453	yes	yes	yes	yes
JU2619_II:4992898:G->A_1067	yes.JU2619_II:4992898:G->A_1067	JU2619	0.929477	1443	5627		JU2619_II	II	G	A	461283	3982	11	52	63	C:11	T:52	0.00186764	1.61e-05	C:0.00000004	T:0.00000021	279808	2669	C:11	T:52	0.00232544	2.22e-05	C:0.00000009	T:0.00000043	0.00855856	465265	yes	yes	yes	yes
JU2619_III:1530223:G->A_1147	yes.JU2619_III:1530223:G->A_1147	JU2619	0.929477	1443	5627		JU2619_III	III	G	A	139431	1186	6	28	34	C:6	T:28	0.00056453	4.8e-06	C:0.00000002	T:0.00000011	84144	780	C:6	T:28	0.00069931	6.48e-06	C:0.00000005	T:0.00000023	0.00843426	140617	yes	yes	yes	yes
JU2619_V:11674237:C->T_1448	yes.JU2619_V:11674237:C->T_1448	JU2619	0.929477	1443	5627		JU2619_V	V	C	T	211238	1434	26	10	36	A:26	G:10	0.00085526	5.81e-06	A:0.00000011	G:0.00000004	138273	1058	A:26	G:10	0.00114916	8.79e-06	A:0.00000022	G:0.00000008	0.00674278	212672	yes	yes	yes	yes
JU2811_II:736431:C->A_0044	yes.JU2811_II:736431:C->A_0044	JU2811	0.920053	3340	12434	3	JU2811_II	II	C	A	862463	5277	63	353	416	G:63	T:353	0.00349194	2.14e-05	G:0.00000026	T:0.00000143	424819	3134	G:60	T:314	0.0035306	2.61e-05	G:0.00000050	T:0.00000261	0.00608132	867740	yes	yes	yes	yes
JU2811_IV:16491929:G->A_1099	yes.JU2811_IV:16491929:G->A_1099	JU2811	0.920053	3340	12434		JU2811_IV	IV	G	A	750004	5857	81	252	333	C:81	T:252	0.00303662	2.37e-05	C:0.00000033	T:0.00000102	382690	3590	C:81	T:249	0.00318048	2.98e-05	C:0.00000067	T:0.00000207	0.00774878	755861	yes	yes	yes	yes
JU2811_V:16588101:A->G_2625	no.JU2811_V:16588101:A->G_2625	JU2811	0.920053	3340	12434		JU2811_V	V	A	G	527430	177	78	53	131	C:78	T:53	0.00213546	7.2e-07	C:0.00000032	T:0.00000021	291934	175	C:78	T:53	0.00242622	1.45e-06	C:0.00000065	T:0.00000044	0.000335477	527607	no	yes	yes	no
JU2811_X:10960240:T->A_2748	yes.JU2811_X:10960240:T->A_2748	JU2811	0.920053	3340	12434		JU2811_X	X	T	A	947580	6841	54	448	502	C:54	G:448	0.00383656	2.77e-05	C:0.00000022	G:0.00000181	505631	4467	C:54	G:448	0.00420222	3.71e-05	C:0.00000045	G:0.00000372	0.0071677	954421	yes	yes	yes	yes
JU2829_I:2816753:G->A_0006	yes.JU2829_I:2816753:G->A_0006	JU2829	0.921487	457	9038	3	JU2829_I	I	G	A	509464	5467	955	2141	3096	C:955	T:2141	0.00206272	2.21e-05	C:0.00000387	T:0.00000867	286389	4122	C:953	T:2129	0.00238013	3.43e-05	C:0.00000792	T:0.00001769	0.010617	514931	yes	yes	yes	yes
JU2829_II:11708519:A->G_0086	yes.JU2829_II:11708519:A->G_0086	JU2829	0.921487	457	9038		JU2829_II	II	A	G	407776	3203	138	103	241	C:138	T:103	0.001651	1.3e-05	C:0.00000056	T:0.00000042	227455	1886	C:137	T:103	0.00189034	1.57e-05	C:0.00000114	T:0.00000086	0.00779359	410979	yes	yes	yes	yes
JU2829_III:7880361:T->C_0132	no.JU2829_III:7880361:T->C_0132	JU2829	0.921487	457	9038		JU2829_III	III	T	C	359861	59	108	46	154	A:108	G:46	0.001457	2.4e-07	A:0.00000044	G:0.00000019	185701	57	A:108	G:46	0.00154333	4.7e-07	A:0.00000090	G:0.00000038	0.000163925	359920	no	yes	yes	no
JU2829_IV:10574711:C->T_0188	yes.JU2829_IV:10574711:C->T_0188	JU2829	0.921487	457	9038		JU2829_IV	IV	C	T	391259	3050	180	114	294	A:180	G:114	0.00158413	1.24e-05	A:0.00000073	G:0.00000046	215413	2005	A:174	G:113	0.00179026	1.67e-05	A:0.00000145	G:0.00000094	0.00773505	394309	yes	yes	yes	yes
JU2838_I:6421:A->T_0001	yes.JU2838_I:6421:A->T_0001	JU2838	0.921366	1783	14262	3	JU2838_I	I	A	T	224443	1531	9	23	32	C:9	G:23	0.00090872	6.2e-06	C:0.00000004	G:0.00000009	146639	1058	C:9	G:23	0.00121869	8.79e-06	C:0.00000007	G:0.00000019	0.00677512	225974	yes	yes	yes	yes
JU2838_III:12688816:G->A_0999	yes.JU2838_III:12688816:G->A_0999	JU2838	0.921366	1783	14262		JU2838_III	III	G	A	166846	1946	12	60	72	C:12	T:60	0.00067553	7.88e-06	C:0.00000005	T:0.00000024	99630	1267	C:12	T:59	0.00082801	1.05e-05	C:0.00000010	T:0.00000049	0.011529	168792	yes	yes	yes	yes
JU2838_IV:16927896:A->T_1391	yes.JU2838_IV:16927896:A->T_1391	JU2838	0.921366	1783	14262		JU2838_IV	IV	A	T	764654	5842	951	408	1359	C:951	G:408	0.00309593	2.37e-05	C:0.00000385	G:0.00000165	358404	3315	C:937	G:408	0.00297864	2.76e-05	C:0.00000779	G:0.00000339	0.00758213	770496	yes	yes	yes	yes
JU2838_V:8999057:A->C_1466	no.JU2838_V:8999057:A->C_1466	JU2838	0.921366	1783	14262		JU2838_V	V	A	C	2899862	78809	302	108	410	G:302	T:108	0.011741	0.00031908	G:0.00000122	T:0.00000044	1056563	50383	G:296	T:106	0.00878093	0.00041873	G:0.00000246	T:0.00000088	0.0264578	2978671	yes	no	yes	no
JU2841_II:13971639:C->T_0963	yes.JU2841_II:13971639:C->T_0963	JU2841	0.922917	2369	9967	4	JU2841_II	II	C	T	62610	966	28	5	33	A:28	G:5	0.0002535	3.91e-06	A:0.00000011	G:0.00000002	37363	440	A:24	G:5	0.00031052	3.66e-06	A:0.00000020	G:0.00000004	0.0151944	63576	yes	yes	yes	yes
JU2841_III:11161992:T->C_1488	yes.JU2841_III:11161992:T->C_1488	JU2841	0.922917	2369	9967		JU2841_III	III	T	C	669845	6608	311	86	397	A:311	G:86	0.00271207	2.68e-05	A:0.00000126	G:0.00000035	288375	3117	A:308	G:86	0.00239664	2.59e-05	A:0.00000256	G:0.00000071	0.0097686	676453	yes	yes	yes	yes
JU2841_V:8629430:G->A_2371	yes.JU2841_V:8629430:G->A_2371	JU2841	0.922917	2369	9967		JU2841_V	V	G	A	236927	1447	5	19	24	C:5	T:19	0.00095927	5.86e-06	C:0.00000002	T:0.00000008	143208	941	C:5	T:17	0.00119018	7.82e-06	C:0.00000004	T:0.00000014	0.00607029	238374	yes	yes	yes	yes
JU2841_X:15842559:A->G_2642	yes.JU2841_X:15842559:A->G_2642	JU2841	0.922917	2369	9967		JU2841_X	X	A	G	477640	3562	469	727	1196	C:469	T:727	0.00193387	1.44e-05	C:0.00000190	T:0.00000294	252005	2292	C:469	T:725	0.00209437	1.91e-05	C:0.00000390	T:0.00000603	0.0074023	481202	yes	yes	yes	yes
JU2878_I:11925872:C->T_0511	yes.JU2878_I:11925872:C->T_0511	JU2878	0.924011	3812	11441	2	JU2878_I	I	C	T	426233	3581	287	20	307	A:287	G:20	0.00172573	1.45e-05	A:0.00000116	G:0.00000008	248498	2348	A:246	G:19	0.00206523	1.95e-05	A:0.00000204	G:0.00000016	0.00833151	429814	yes	yes	yes	yes
JU2878_II:2250295:C->T_0729	no.JU2878_II:2250295:C->T_0729	JU2878	0.924011	3812	11441		JU2878_II	II	C	T	12376	0	5	2	7	A:5	G:2	5.01e-05	0	A:0.00000002	G:0.00000001	8422	0	A:5	G:2	7e-05	0	A:0.00000004	G:0.00000002	0	12376	no	no	yes	no
JU2878_III:12666999:A->G_1095	no.JU2878_III:12666999:A->G_1095	JU2878	0.924011	3812	11441		JU2878_III	III	A	G	5254	34	0	0	0	C:0	T:0	2.13e-05	1.4e-07	C:0	T:0	3382	23	C:0	T:0	2.81e-05	1.9e-07	C:0	T:0	0.00642965	5288	yes	no	yes	no
JU2878_V:175914:C->A_1628	yes.JU2878_V:175914:C->A_1628	JU2878	0.924011	3812	11441		JU2878_V	V	C	A	22369	169	1	1	2	G:1	T:1	9.06e-05	6.8e-07	G:0.00000000	T:0.00000000	13974	107	G:1	T:1	0.00011614	8.9e-07	G:0.00000001	T:0.00000001	0.00749845	22538	yes	yes	yes	yes
JU2879_I:7951960:G->A_0080	yes.JU2879_I:7951960:G->A_0080	JU2879	0.91082	1590	19936	3	JU2879_I	I	G	A	838743	7960	19	110	129	C:19	T:110	0.0033959	3.22e-05	C:0.00000008	T:0.00000045	437806	5166	C:19	T:107	0.00363854	4.29e-05	C:0.00000016	T:0.00000089	0.00940117	846703	yes	yes	yes	yes
JU2879_II:6620354:G->A_0258	yes.JU2879_II:6620354:G->A_0258	JU2879	0.91082	1590	19936		JU2879_II	II	G	A	525490	5112	44	123	167	C:44	T:123	0.0021276	2.07e-05	C:0.00000018	T:0.00000050	281211	3239	C:44	T:123	0.0023371	2.69e-05	C:0.00000037	T:0.00000102	0.00963434	530602	yes	yes	yes	yes
JU2879_III:12810613:G->T_0511	yes.JU2879_III:12810613:G->T_0511	JU2879	0.91082	1590	19936		JU2879_III	III	G	T	461812	4582	65	19	84	A:65	C:19	0.00186978	1.86e-05	A:0.00000026	C:0.00000008	273277	3037	A:65	C:19	0.00227116	2.52e-05	A:0.00000054	C:0.00000016	0.00982431	466394	yes	yes	yes	yes
JU2879_V:3349200:G->A_0703	no.JU2879_V:3349200:G->A_0703	JU2879	0.91082	1590	19936		JU2879_V	V	G	A	364999	447	12	39	51	C:12	T:39	0.00147781	1.81e-06	C:0.00000005	T:0.00000016	194872	267	C:12	T:39	0.00161955	2.22e-06	C:0.00000010	T:0.00000032	0.00122316	365446	no	yes	yes	no
JU3137_I:926958:G->A_0007	yes.JU3137_I:926958:G->A_0007	JU3137	0.929542	1057	7213	3	JU3137_I	I	G	A	205803	2342	2	23	25	C:2	T:23	0.00083325	9.48e-06	C:0.00000001	T:0.00000009	124894	1474	C:2	T:21	0.00103797	1.23e-05	C:0.00000002	T:0.00000017	0.0112518	208145	yes	yes	yes	yes
JU3137_II:4312381:T->C_0164	no.JU3137_II:4312381:T->C_0164	JU3137	0.929542	1057	7213		JU3137_II	II	T	C	41546	2198	12	6	18	A:12	G:6	0.00016821	8.9e-06	A:0.00000005	G:0.00000002	26448	1524	A:12	G:6	0.00021981	1.27e-05	A:0.00000010	G:0.00000005	0.0502469	43744	no	yes	yes	no
JU3137_IV:11788808:A->C_0676	yes.JU3137_IV:11788808:A->C_0676	JU3137	0.929542	1057	7213		JU3137_IV	IV	A	C	1157414	11539	195	65	260	G:195	T:65	0.00468614	4.67e-05	G:0.00000079	T:0.00000026	486065	5933	G:191	T:59	0.00403961	4.93e-05	G:0.00000159	T:0.00000049	0.00987123	1168953	yes	yes	yes	yes
JU3137_V:7226702:G->A_0831	yes.JU3137_V:7226702:G->A_0831	JU3137	0.929542	1057	7213		JU3137_V	V	G	A	495293	5445	16	56	72	C:16	T:56	0.00200534	2.21e-05	C:0.00000006	T:0.00000023	259391	3262	C:16	T:55	0.00215576	2.71e-05	C:0.00000013	T:0.00000046	0.010874	500738	yes	yes	yes	yes
JU561_I:8259121:C->T_0045	yes.JU561_I:8259121:C->T_0045	JU561	0.934427	473	2250	4	JU561_I	I	C	T	336581	2601	17	6	23	A:17	G:6	0.00136275	1.05e-05	A:0.00000007	G:0.00000002	213161	1810	A:16	G:6	0.00177155	1.5e-05	A:0.00000013	G:0.00000005	0.00766845	339182	yes	yes	yes	yes
JU561_III:7999832:G->A_0248	yes.JU561_III:7999832:G->A_0248	JU561	0.934427	473	2250		JU561_III	III	G	A	801990	4918	10	90	100	C:10	T:90	0.0032471	1.99e-05	C:0.00000004	T:0.00000036	426220	3130	C:10	T:82	0.00354225	2.6e-05	C:0.00000008	T:0.00000068	0.00609487	806908	yes	yes	yes	yes
JU561_IV:7559511:G->A_0348	yes.JU561_IV:7559511:G->A_0348	JU561	0.934427	473	2250		JU561_IV	IV	G	A	461794	2884	13	47	60	C:13	T:47	0.00186971	1.17e-05	C:0.00000005	T:0.00000019	264577	1952	C:11	T:45	0.00219886	1.62e-05	C:0.00000009	T:0.00000037	0.00620645	464678	yes	yes	yes	yes
JU561_X:17631003:C->T_0627	yes.JU561_X:17631003:C->T_0627	JU561	0.934427	473	2250		JU561_X	X	C	T	719556	4287	362	16	378	A:362	G:16	0.00291334	1.74e-05	A:0.00000147	G:0.00000006	370865	2661	A:283	G:16	0.0030822	2.21e-05	A:0.00000235	G:0.00000013	0.00592256	723843	yes	yes	yes	yes
JU774_II:2390215:T->A_0137	yes.JU774_II:2390215:T->A_0137	JU774	0.925615	942	10660	3	JU774_II	II	T	A	274612	5553	33	26	59	C:33	G:26	0.00111185	2.25e-05	C:0.00000013	G:0.00000011	152778	3160	C:32	G:26	0.00126971	2.63e-05	C:0.00000027	G:0.00000022	0.0198205	280165	yes	yes	yes	yes
JU774_III:6970441:G->T_0272	no.JU774_III:6970441:G->T_0272	JU774	0.925615	942	10660		JU774_III	III	G	T	1013976	5270	649	1148947	1149596	A:649	C:1148947	0.00410538	2.13e-05	A:0.00000263	C:0.00465186	516142	3368	A:512	C:568103	0.00428957	2.8e-05	A:0.00000426	C:0.00472141	0.00517049	1019246	yes	yes	no	no
JU774_IV:7090536:C->T_0393	yes.JU774_IV:7090536:C->T_0393	JU774	0.925615	942	10660		JU774_IV	IV	C	T	729850	4165	459	95	554	A:459	G:95	0.00295502	1.69e-05	A:0.00000186	G:0.00000038	389513	2619	A:381	G:95	0.00323718	2.18e-05	A:0.00000317	G:0.00000079	0.00567427	734015	yes	yes	yes	yes
JU774_V:12647774:C->T_0618	yes.JU774_V:12647774:C->T_0618	JU774	0.925615	942	10660		JU774_V	V	C	T	444596	2574	297	5	302	A:297	G:5	0.00180008	1.04e-05	A:0.00000120	G:0.00000002	239752	1578	A:219	G:5	0.00199254	1.31e-05	A:0.00000182	G:0.00000004	0.0057562	447170	yes	yes	yes	yes
JU775_II:12829294:T->C_0060	no.JU775_II:12829294:T->C_0060	JU775	0.904027	216	23552	3	JU775_II	II	T	C	560238	1048	203	161	364	A:203	G:161	0.00226829	4.24e-06	A:0.00000082	G:0.00000065	297039	723	A:199	G:160	0.00246864	6.01e-06	A:0.00000165	G:0.00000133	0.00186714	561286	no	yes	yes	no
JU775_III:6003176:G->T_0093	yes.JU775_III:6003176:G->T_0093	JU775	0.904027	216	23552		JU775_III	III	G	T	564619	6534	91	11	102	A:91	C:11	0.00228603	2.65e-05	A:0.00000037	C:0.00000004	283455	4023	A:87	C:10	0.00235575	3.34e-05	A:0.00000072	C:0.00000008	0.01144	571153	yes	yes	yes	yes
JU775_IV:11996296:A->T_0168	yes.JU775_IV:11996296:A->T_0168	JU775	0.904027	216	23552		JU775_IV	IV	A	T	460816	6001	43	72	115	C:43	G:72	0.00186575	2.43e-05	C:0.00000017	G:0.00000029	270335	3837	C:43	G:72	0.00224671	3.19e-05	C:0.00000036	G:0.00000060	0.0128551	466817	yes	yes	yes	yes
JU775_X:14768501:G->A_0257	yes.JU775_X:14768501:G->A_0257	JU775	0.904027	216	23552		JU775_X	X	G	A	814873	8658	34	95	129	C:34	T:95	0.00329926	3.51e-05	C:0.00000014	T:0.00000038	393789	5369	C:34	T:94	0.00327272	4.46e-05	C:0.00000028	T:0.00000078	0.0105133	823531	yes	yes	yes	yes
JU782_II:9260290:G->A_0071	yes.JU782_II:9260290:G->A_0071	JU782	0.915536	366	10850	4	JU782_II	II	G	A	380293	4411	17	43	60	C:17	T:43	0.00153973	1.79e-05	C:0.00000007	T:0.00000017	214267	2719	C:17	T:43	0.00178074	2.26e-05	C:0.00000014	T:0.00000036	0.011466	384704	yes	yes	yes	yes
JU782_III:10628882:G->A_0153	yes.JU782_III:10628882:G->A_0153	JU782	0.915536	366	10850		JU782_III	III	G	A	788085	9995	53	172	225	C:53	T:172	0.0031908	4.05e-05	C:0.00000021	T:0.00000070	435532	6788	C:53	T:159	0.00361964	5.64e-05	C:0.00000044	T:0.00000132	0.0125238	798080	yes	yes	yes	yes
JU782_III:8881243:C->T_0148	yes.JU782_III:8881243:C->T_0148	JU782	0.915536	366	10850		JU782_III	III	C	T	984916	11499	513	23	536	A:513	G:23	0.00398773	4.66e-05	A:0.00000208	G:0.00000009	459507	6562	A:414	G:23	0.00381889	5.45e-05	A:0.00000344	G:0.00000019	0.0115404	996415	yes	yes	yes	yes
JU782_V:781340:G->A_0221	yes.JU782_V:781340:G->A_0221	JU782	0.915536	366	10850		JU782_V	V	G	A	167173	2610	15	183	198	C:15	T:183	0.00067685	1.06e-05	C:0.00000006	T:0.00000074	108702	1824	C:14	T:153	0.0009034	1.52e-05	C:0.00000012	T:0.00000127	0.0153726	169783	yes	yes	yes	yes
KR314_I:13876048:A->G_0207	yes.KR314_I:13876048:A->G_0207	KR314	0.933208	1195	5075	3	KR314_I	I	A	G	658337	4658	22	22	44	C:22	T:22	0.00266547	1.89e-05	C:0.00000009	T:0.00000009	341811	3103	C:22	T:18	0.00284074	2.58e-05	C:0.00000018	T:0.00000015	0.00702569	662995	yes	yes	yes	yes
KR314_II:9695138:G->A_0499	yes.KR314_II:9695138:G->A_0499	KR314	0.933208	1195	5075		KR314_II	II	G	A	807788	8829	16	83	99	C:16	T:83	0.00327057	3.58e-05	C:0.00000006	T:0.00000034	415970	5460	C:16	T:79	0.00345706	4.54e-05	C:0.00000013	T:0.00000066	0.0108117	816617	yes	yes	yes	yes
KR314_IV:1816421:A->G_0840	no.KR314_IV:1816421:A->G_0840	KR314	0.933208	1195	5075		KR314_IV	IV	A	G	372632	142	151	154	305	C:151	T:154	0.00150871	5.7e-07	C:0.00000061	T:0.00000062	211904	142	C:151	T:154	0.0017611	1.18e-06	C:0.00000125	T:0.00000128	0.000380928	372774	no	yes	yes	no
KR314_X:16497991:C->G_1311	yes.KR314_X:16497991:C->G_1311	KR314	0.933208	1195	5075		KR314_X	X	C	G	1025784	9043	796	410	1206	A:796	T:410	0.00415319	3.66e-05	A:0.00000322	T:0.00000166	481740	5277	A:682	T:410	0.00400366	4.39e-05	A:0.00000567	T:0.00000341	0.00873866	1034827	yes	yes	yes	yes
LKC34_II:3120049:A->G_0172	yes.LKC34_II:3120049:A->G_0172	LKC34	0.934468	1274	3606	4	LKC34_II	II	A	G	606907	2725	118	131	249	C:118	T:131	0.00245724	1.1e-05	C:0.00000048	T:0.00000053	307894	1811	C:118	T:130	0.00255886	1.51e-05	C:0.00000098	T:0.00000108	0.00446991	609632	yes	yes	yes	yes
LKC34_III:9930207:C->T_0699	yes.LKC34_III:9930207:C->T_0699	LKC34	0.934468	1274	3606		LKC34_III	III	C	T	1167465	8106	789	35	824	A:789	G:35	0.00472683	3.28e-05	A:0.00000319	G:0.00000014	507940	4744	A:547	G:34	0.00422141	3.94e-05	A:0.00000455	G:0.00000028	0.00689537	1175571	yes	yes	yes	yes
LKC34_IV:16717503:T->C_0926	yes.LKC34_IV:16717503:T->C_0926	LKC34	0.934468	1274	3606		LKC34_IV	IV	T	C	99021	835	28	19	47	A:28	G:19	0.00040092	3.38e-06	A:0.00000011	G:0.00000008	59940	492	A:28	G:19	0.00049815	4.09e-06	A:0.00000023	G:0.00000016	0.00836204	99856	yes	yes	yes	yes
LKC34_X:9974623:C->T_1226	yes.LKC34_X:9974623:C->T_1226	LKC34	0.934468	1274	3606		LKC34_X	X	C	T	341547	2332	191	12	203	A:191	G:12	0.00138286	9.44e-06	A:0.00000077	G:0.00000005	192032	1420	A:150	G:12	0.00159595	1.18e-05	A:0.00000125	G:0.00000010	0.00678145	343879	yes	yes	yes	yes
MY10_I:2148947:G->A_0126	yes.MY10_I:2148947:G->A_0126	MY10	0.911782	4809	20113	4	MY10_I	I	G	A	664500	4230	31	55	86	C:31	T:55	0.00269043	1.71e-05	C:0.00000013	T:0.00000022	319666	2522	C:26	T:55	0.00265669	2.1e-05	C:0.00000022	T:0.00000046	0.00632542	668730	yes	yes	yes	yes
MY10_II:2879299:C->T_2231	yes.MY10_II:2879299:C->T_2231	MY10	0.911782	4809	20113		MY10_II	II	C	T	204406	2125	110	14	124	A:110	G:14	0.0008276	8.6e-06	A:0.00000045	G:0.00000006	125536	1407	A:93	G:14	0.00104331	1.17e-05	A:0.00000077	G:0.00000012	0.010289	206531	yes	yes	yes	yes
MY10_IV:4179751:G->A_2677	yes.MY10_IV:4179751:G->A_2677	MY10	0.911782	4809	20113		MY10_IV	IV	G	A	315867	2010	16	43	59	C:16	T:43	0.00127888	8.14e-06	C:0.00000006	T:0.00000017	181734	1257	C:16	T:41	0.00151036	1.05e-05	C:0.00000013	T:0.00000034	0.0063232	317877	yes	yes	yes	yes
MY10_X:5146613:G->T_3235	yes.MY10_X:5146613:G->T_3235	MY10	0.911782	4809	20113		MY10_X	X	G	T	699144	3512	49	15	64	A:49	C:15	0.00283069	1.42e-05	A:0.00000020	C:0.00000006	372916	2243	A:49	C:15	0.00309924	1.86e-05	A:0.00000041	C:0.00000012	0.00499818	702656	yes	yes	yes	yes
MY16_II:1895575:A->G_0061	no.MY16_II:1895575:A->G_0061	MY16	0.906511	357	24718	1	MY16_II	II	A	G	169623	128	34	27	61	C:34	T:27	0.00068677	5.2e-07	C:0.00000014	T:0.00000011	107605	103	C:34	T:27	0.00089429	8.6e-07	C:0.00000028	T:0.00000022	0.000754046	169751	no	yes	yes	no
MY16_V:13037037:A->T_0241	yes.MY16_V:13037037:A->T_0241	MY16	0.906511	357	24718		MY16_V	V	A	T	181189	2559	56	39	95	C:56	G:39	0.0007336	1.04e-05	C:0.00000023	G:0.00000016	105099	1571	C:56	G:39	0.00087346	1.31e-05	C:0.00000047	G:0.00000032	0.0139267	183748	yes	yes	yes	yes
MY16_V:19311433:G->T_0296	no.MY16_V:19311433:G->T_0296	MY16	0.906511	357	24718		MY16_V	V	G	T	29368	4	5	0	5	A:5	C:0	0.00011891	2e-08	A:0.00000002	C:0	18756	4	A:5	C:0	0.00015588	3e-08	A:0.00000004	C:0	0.000136184	29372	no	yes	yes	no
MY16_V:20214591:G->A_0329	no.MY16_V:20214591:G->A_0329	MY16	0.906511	357	24718		MY16_V	V	G	A	330730	56	8	60	68	C:8	T:60	0.00133906	2.3e-07	C:0.00000003	T:0.00000024	184206	56	C:8	T:60	0.00153091	4.7e-07	C:0.00000007	T:0.00000050	0.000169294	330786	no	yes	yes	no
MY18_I:1222705:A->T_0006	yes.MY18_I:1222705:A->T_0006	MY18	0.921761	138	5234	2	MY18_I	I	A	T	399493	2242	62	60	122	C:62	G:60	0.00161747	9.08e-06	C:0.00000025	G:0.00000024	218010	1454	C:62	G:60	0.00181185	1.21e-05	C:0.00000052	G:0.00000050	0.00558079	401735	yes	yes	yes	yes
MY18_II:1787275:A->G_0044	yes.MY18_II:1787275:A->G_0044	MY18	0.921761	138	5234		MY18_II	II	A	G	184739	3583	64	58	122	C:64	T:58	0.00074797	1.45e-05	C:0.00000026	T:0.00000023	106286	2228	C:64	T:58	0.00088333	1.85e-05	C:0.00000053	T:0.00000048	0.0190259	188322	yes	yes	yes	yes
MY18_II:2428802:A->G_0046	no.MY18_II:2428802:A->G_0046	MY18	0.921761	138	5234		MY18_II	II	A	G	15049	208277	4803	74201	79004	C:4803	T:74201	6.09e-05	0.00084327	C:0.00001945	T:0.00030042	9439	73394	C:1965	T:27016	7.85e-05	0.00060997	C:0.00001633	T:0.00022453	0.932614	223326	no	yes	no	no
MY18_II:2622330:A->C_0049	no.MY18_II:2622330:A->C_0049	MY18	0.921761	138	5234		MY18_II	II	A	C	368074	312	203	137	340	G:203	T:137	0.00149026	1.26e-06	G:0.00000082	T:0.00000055	186985	284	G:190	T:137	0.001554	2.36e-06	G:0.00000158	T:0.00000114	0.000846938	368386	no	yes	yes	no
MY2147_I:7395710:G->A_0058	yes.MY2147_I:7395710:G->A_0058	MY2147	0.928867	912	6408	4	MY2147_I	I	G	A	968525	12553	45	152	197	C:45	T:152	0.00392136	5.08e-05	C:0.00000018	T:0.00000062	486225	7911	C:45	T:141	0.00404094	6.58e-05	C:0.00000037	T:0.00000117	0.0127951	981078	yes	yes	yes	yes
MY2147_II:7858153:A->G_0136	yes.MY2147_II:7858153:A->G_0136	MY2147	0.928867	912	6408		MY2147_II	II	A	G	1410103	17277	113	112	225	C:113	T:112	0.00570922	7e-05	C:0.00000046	T:0.00000045	654295	10449	C:113	T:112	0.00543774	8.68e-05	C:0.00000094	T:0.00000093	0.012104	1427380	yes	yes	yes	yes
MY2147_IV:8817919:A->T_0350	yes.MY2147_IV:8817919:A->T_0350	MY2147	0.928867	912	6408		MY2147_IV	IV	A	T	860832	11810	178	203	381	C:178	G:203	0.00348534	4.78e-05	C:0.00000072	G:0.00000082	423704	6786	C:178	G:199	0.00352134	5.64e-05	C:0.00000148	G:0.00000165	0.0135336	872642	yes	yes	yes	yes
MY2147_V:20500817:C->T_0825	yes.MY2147_V:20500817:C->T_0825	MY2147	0.928867	912	6408		MY2147_V	V	C	T	461731	6877	179	21	200	A:179	G:21	0.00186946	2.78e-05	A:0.00000072	G:0.00000009	277081	4588	A:156	G:21	0.00230278	3.81e-05	A:0.00000130	G:0.00000017	0.0146754	468608	yes	yes	yes	yes
MY23_I:2830426:G->A_0275	yes.MY23_I:2830426:G->A_0275	MY23	0.893021	1703	36370	2	MY23_I	I	G	A	406216	4668	3	17	20	C:3	T:17	0.00164469	1.89e-05	C:0.00000001	T:0.00000007	231495	3054	C:3	T:16	0.00192392	2.54e-05	C:0.00000002	T:0.00000013	0.0113609	410884	yes	yes	yes	yes
MY23_II:13379927:A->G,T_0536	no.MY23_II:13379927:A->G,T_0536	MY23	0.893021	1703	36370		MY23_II	II	A	G	543520	75	33	24613	24646	C:33	T:24613	0.0022006	3e-07	C:0.00000013	T:0.00009965	295616	75	C:30	T:15704	0.00245682	6.2e-07	C:0.00000025	T:0.00013051	0.00013797	543595	no	yes	no	no
MY23_III:6291822:A->T_1070	yes.MY23_III:6291822:A->T_1070	MY23	0.893021	1703	36370		MY23_III	III	A	T	259986	4001	22	97	119	C:22	G:97	0.00105263	1.62e-05	C:0.00000009	G:0.00000039	179411	3007	C:22	G:96	0.00149106	2.5e-05	C:0.00000018	G:0.00000080	0.015156	263987	yes	yes	yes	yes
MY23_V:20322393:G->A_1540	no.MY23_V:20322393:G->A_1540	MY23	0.893021	1703	36370		MY23_V	V	G	A	370889	319	49	125	174	C:49	T:125	0.00150165	1.29e-06	C:0.00000020	T:0.00000051	188325	309	C:48	T:123	0.00156514	2.57e-06	C:0.00000040	T:0.00000102	0.000859356	371208	no	yes	yes	no
MY2453_I:1768407:A->T_0018	yes.MY2453_I:1768407:A->T_0018	MY2453	0.925639	1250	2598	3	MY2453_I	I	A	T	214129	3283	56	172	228	C:56	G:172	0.00086697	1.33e-05	C:0.00000023	G:0.00000070	129176	2091	C:56	G:165	0.00107356	1.74e-05	C:0.00000047	G:0.00000137	0.0151004	217412	yes	yes	yes	yes
MY2453_II:681909:A->G_0119	yes.MY2453_II:681909:A->G_0119	MY2453	0.925639	1250	2598		MY2453_II	II	A	G	96356	1548	27	288	315	C:27	T:288	0.00039013	6.27e-06	C:0.00000011	T:0.00000117	64002	1068	C:27	T:177	0.00053191	8.88e-06	C:0.00000022	T:0.00000147	0.0158114	97904	yes	yes	yes	yes
MY2453_III:1068285:A->G_0364	no.MY2453_III:1068285:A->G_0364	MY2453	0.925639	1250	2598		MY2453_III	III	A	G	289890	32	14	15	29	C:14	T:15	0.00117371	1.3e-07	C:0.00000006	T:0.00000006	156400	29	C:14	T:12	0.00129982	2.4e-07	C:0.00000012	T:0.00000010	0.000110375	289922	no	yes	yes	no
MY2453_X:6949735:G->A_0822	yes.MY2453_X:6949735:G->A_0822	MY2453	0.925639	1250	2598		MY2453_X	X	G	A	829591	12139	31	80	111	C:31	T:80	0.00335885	4.92e-05	C:0.00000013	T:0.00000032	403443	7131	C:31	T:78	0.00335295	5.93e-05	C:0.00000026	T:0.00000065	0.0144215	841730	yes	yes	yes	yes
MY2741_I:1388481:C->A_0002	no.MY2741_I:1388481:C->A_0002	MY2741	0.920804	152	4988	2	MY2741_I	I	C	A	113524	139	39	287	326	G:39	T:287	0.00045964	5.6e-07	G:0.00000016	T:0.00000116	66661	83	G:21	T:208	0.00055401	6.9e-07	G:0.00000017	T:0.00000173	0.00122291	113663	no	yes	yes	no
MY2741_II:3362289:G->A_0067	no.MY2741_II:3362289:G->A_0067	MY2741	0.920804	152	4988		MY2741_II	II	G	A	325793	20	7	30	37	C:7	T:30	0.00131907	8e-08	C:0.00000003	T:0.00000012	177637	20	C:7	T:29	0.00147631	1.7e-07	C:0.00000006	T:0.00000024	6.14e-05	325813	no	yes	yes	no
MY2741_V:11214926:A->G_0175	yes.MY2741_V:11214926:A->G_0175	MY2741	0.920804	152	4988		MY2741_V	V	A	G	616738	6505	140	172	312	C:140	T:172	0.00249705	2.63e-05	C:0.00000057	T:0.00000070	345851	4183	C:140	T:172	0.00287431	3.48e-05	C:0.00000116	T:0.00000143	0.0104373	623243	yes	yes	yes	yes
MY2741_X:12245473:C->T_0220	yes.MY2741_X:12245473:C->T_0220	MY2741	0.920804	152	4988		MY2741_X	X	C	T	817233	8723	473	62	535	A:473	G:62	0.00330881	3.53e-05	A:0.00000192	G:0.00000025	426474	5395	A:358	G:60	0.00354436	4.48e-05	A:0.00000298	G:0.00000050	0.0105611	825956	yes	yes	yes	yes
N2_I:12042548:G->C_0004	yes.N2_I:12042548:G->C_0004	N2	0.938962	0	297	4	N2_I	I	G	C	7096	238924	2737	3771	6508	A:2737	T:3771	2.87e-05	0.00096736	A:0.00001108	T:0.00001527	3838	169657	A:1639	T:1786	3.19e-05	0.00140999	A:0.00001362	T:0.00001484	0.971157	246020	no	yes	yes	yes
N2_III:2770134:T->G_0007	yes.N2_III:2770134:T->G_0007	N2	0.938962	0	297		N2_III	III	T	G	7060	2498	81	49	130	A:81	C:49	2.86e-05	1.01e-05	A:0.00000033	C:0.00000020	6344	2394	A:69	C:49	5.27e-05	1.99e-05	A:0.00000057	C:0.00000041	0.261352	9558	no	no	yes	yes
N2_III:7447025:C->G_0007	yes.N2_III:7447025:C->G_0007	N2	0.938962	0	297		N2_III	III	C	G	3835900	469879	22307	46355	68662	A:22307	T:46355	0.0155308	0.00190245	A:0.00009032	T:0.00018768	877996	178840	A:10087	T:19416	0.00729688	0.00148631	A:0.00008383	T:0.00016136	0.109128	4305779	no	no	no	yes
N2_V:12775675:A->T_0012	yes.N2_V:12775675:A->T_0012	N2	0.938962	0	297		N2_V	V	A	T	566	37902	13	36	49	C:13	G:36	2.29e-06	0.00015346	C:0.00000005	G:0.00000015	477	20569	C:10	G:28	3.96e-06	0.00017095	C:0.00000008	G:0.00000023	0.985286	38468	no	yes	yes	yes
NIC195_I:9787695:T->C_0093	yes.NIC195_I:9787695:T->C_0093	NIC195	0.897821	1459	24239	3	NIC195_I	I	T	C	337006	3312	63	68	131	A:63	G:68	0.00136447	1.34e-05	A:0.00000026	G:0.00000028	198879	2152	A:63	G:68	0.00165285	1.79e-05	A:0.00000052	G:0.00000057	0.00973207	340318	yes	yes	yes	yes
NIC195_III:12677731:C->G,T_0554	no.NIC195_III:12677731:C->G,T_0554	NIC195	0.897821	1459	24239		NIC195_III	III	C	G	0	0	0	0	0	A:0	T:0	0	0	A:0	T:0	0	0	A:0	T:0	0	0	A:0	T:0			no	no	yes	no
NIC195_IV:2651378:G->T_0593	yes.NIC195_IV:2651378:G->T_0593	NIC195	0.897821	1459	24239		NIC195_IV	IV	G	T	660540	8336	241	14	255	A:241	C:14	0.00267439	3.38e-05	A:0.00000098	C:0.00000006	316293	4997	A:241	C:13	0.00262866	4.15e-05	A:0.00000200	C:0.00000011	0.0124627	668876	yes	yes	yes	yes
NIC195_V:1868780:G->A_0746	yes.NIC195_V:1868780:G->A_0746	NIC195	0.897821	1459	24239		NIC195_V	V	G	A	432650	4953	12	75	87	C:12	T:75	0.00175171	2.01e-05	C:0.00000005	T:0.00000030	251064	3198	C:12	T:75	0.00208655	2.66e-05	C:0.00000010	T:0.00000062	0.0113185	437603	yes	yes	yes	yes
NIC199_I:849042:T->A_0006	yes.NIC199_I:849042:T->A_0006	NIC199	0.902904	3048	21295	4	NIC199_I	I	T	A	169714	1599	74	104	178	C:74	G:104	0.00068714	6.47e-06	C:0.00000030	G:0.00000042	109631	1124	C:74	G:104	0.00091113	9.34e-06	C:0.00000062	G:0.00000086	0.00933379	171313	yes	yes	yes	yes
NIC199_II:14732413:C->T_0217	yes.NIC199_II:14732413:C->T_0217	NIC199	0.902904	3048	21295		NIC199_II	II	C	T	310676	3217	210	22	232	A:210	G:22	0.00125786	1.3e-05	A:0.00000085	G:0.00000009	184994	2095	A:188	G:22	0.00153746	1.74e-05	A:0.00000156	G:0.00000018	0.0102487	313893	yes	yes	yes	yes
NIC199_III:3799559:A->T_0280	yes.NIC199_III:3799559:A->T_0280	NIC199	0.902904	3048	21295		NIC199_III	III	A	T	827986	8646	71	1157	1228	C:71	G:1157	0.00335235	3.5e-05	C:0.00000029	G:0.00000468	434280	5263	C:71	G:1073	0.00360923	4.37e-05	C:0.00000059	G:0.00000892	0.0103343	836632	yes	yes	yes	yes
NIC199_IV:49034:A->C_0379	yes.NIC199_IV:49034:A->C_0379	NIC199	0.902904	3048	21295		NIC199_IV	IV	A	C	746314	6638	92	62	154	G:92	T:62	0.00302168	2.69e-05	G:0.00000037	T:0.00000025	402999	4312	G:92	T:62	0.00334926	3.58e-05	G:0.00000076	T:0.00000052	0.00881597	752952	yes	yes	yes	yes
NIC251_II:11260257:A->G_1138	yes.NIC251_II:11260257:A->G_1138	NIC251	0.875753	3808	51588	3	NIC251_II	II	A	G	618477	7897	195	143	338	C:195	T:143	0.00250409	3.2e-05	C:0.00000079	T:0.00000058	327838	5050	C:195	T:140	0.00272461	4.2e-05	C:0.00000162	T:0.00000116	0.0126075	626374	yes	yes	yes	yes
NIC251_III:11187641:A->T_1453	yes.NIC251_III:11187641:A->T_1453	NIC251	0.875753	3808	51588		NIC251_III	III	A	T	975956	13629	23	115	138	C:23	G:115	0.00395145	5.52e-05	C:0.00000009	G:0.00000047	493827	8163	C:23	G:113	0.00410412	6.78e-05	C:0.00000019	G:0.00000094	0.0137724	989585	yes	yes	yes	yes
NIC251_V:7051301:G->T_2385	yes.NIC251_V:7051301:G->T_2385	NIC251	0.875753	3808	51588		NIC251_V	V	G	T	860969	14629	193	30	223	A:193	C:30	0.00348589	5.92e-05	A:0.00000078	C:0.00000012	437663	8818	A:175	C:29	0.00363735	7.33e-05	A:0.00000145	C:0.00000024	0.0167074	875598	yes	yes	yes	yes
NIC251_X:12457598:G->A_3782	no.NIC251_X:12457598:G->A_3782	NIC251	0.875753	3808	51588		NIC251_X	X	G	A	517298	18819	2310	4651	6961	C:2310	T:4651	0.00209444	7.62e-05	C:0.00000935	T:0.00001883	279818	13627	C:2301	T:4616	0.00232552	0.00011325	C:0.00001912	T:0.00003836	0.0351024	536117	no	yes	yes	no
NIC252_I:11562711:A->G_0313	yes.NIC252_I:11562711:A->G_0313	NIC252	0.914547	1645	10194	4	NIC252_I	I	A	G	317373	3312	486	1340	1826	C:486	T:1340	0.00128498	1.34e-05	C:0.00000197	T:0.00000543	182673	2035	C:266	T:839	0.00151817	1.69e-05	C:0.00000221	T:0.00000697	0.0103279	320685	yes	yes	yes	yes
NIC252_II:12805383:C->A_1095	yes.NIC252_II:12805383:C->A_1095	NIC252	0.914547	1645	10194		NIC252_II	II	C	A	254540	3076	12	52	64	G:12	T:52	0.00103058	1.25e-05	G:0.00000005	T:0.00000021	169194	2187	G:12	T:51	0.00140614	1.82e-05	G:0.00000010	T:0.00000042	0.0119403	257616	yes	yes	yes	yes
NIC252_III:11662725:A->T_1204	yes.NIC252_III:11662725:A->T_1204	NIC252	0.914547	1645	10194		NIC252_III	III	A	T	133885	1359	26	23	49	C:26	G:23	0.00054207	5.5e-06	C:0.00000011	G:0.00000009	84191	897	C:26	G:23	0.0006997	7.45e-06	C:0.00000022	G:0.00000019	0.0100485	135244	yes	yes	yes	yes
NIC252_IV:11069611:C->T_1322	yes.NIC252_IV:11069611:C->T_1322	NIC252	0.914547	1645	10194		NIC252_IV	IV	C	T	390592	3189	149	20	169	A:149	G:20	0.00158143	1.29e-05	A:0.00000060	G:0.00000008	215522	1909	A:127	G:20	0.00179117	1.59e-05	A:0.00000106	G:0.00000017	0.00809841	393781	yes	yes	yes	yes
NIC256_II:14311740:A->G_0076	no.NIC256_II:14311740:A->G_0076	NIC256	0.912714	98	8364	1	NIC256_II	II	A	G	509529	940	110	153	263	C:110	T:153	0.00206298	3.81e-06	C:0.00000045	T:0.00000062	268530	934	C:110	T:150	0.00223171	7.76e-06	C:0.00000091	T:0.00000125	0.00184144	510469	no	yes	yes	no
NIC256_II:910005:G->A_0039	yes.NIC256_II:910005:G->A_0039	NIC256	0.912714	98	8364		NIC256_II	II	G	A	854757	11687	27	87	114	C:27	T:87	0.00346074	4.73e-05	C:0.00000011	T:0.00000035	446733	7130	C:26	T:82	0.00371273	5.93e-05	C:0.00000022	T:0.00000068	0.0134885	866444	yes	yes	yes	yes
NIC256_III:617398:G->A_0082	no.NIC256_III:617398:G->A_0082	NIC256	0.912714	98	8364		NIC256_III	III	G	A	363679	114	66	113	179	C:66	T:113	0.00147246	4.6e-07	C:0.00000027	T:0.00000046	200764	114	C:66	T:112	0.00166852	9.5e-07	C:0.00000055	T:0.00000093	0.000313365	363793	no	yes	yes	no
NIC256_X:10575306:G->A_0205	no.NIC256_X:10575306:G->A_0205	NIC256	0.912714	98	8364		NIC256_X	X	G	A	592749	169	94	331	425	C:94	T:331	0.00239992	6.8e-07	C:0.00000038	T:0.00000134	315286	168	C:94	T:276	0.00262029	1.4e-06	C:0.00000078	T:0.00000229	0.000285031	592918	no	yes	yes	no
NIC258_I:3170723:G->T,A_0026	no.NIC258_I:3170723:G->T,A_0026	NIC258	0.895343	268	24849	1	NIC258_I	I	G	T	114503	10936	1641	4	1645	A:1641	C:4	0.0004636	4.43e-05	A:0.00000664	C:0.00000002	74880	4988	A:1173	C:4	0.00062232	4.15e-05	A:0.00000975	C:0.00000003	0.0871818	125439	no	yes	yes	no
NIC258_II:1729029:G->A_0091	no.NIC258_II:1729029:G->A_0091	NIC258	0.895343	268	24849		NIC258_II	II	G	A	730958	30327	198	316	514	C:198	T:316	0.0029595	0.00012279	C:0.00000080	T:0.00000128	370275	18135	C:198	T:313	0.0030773	0.00015072	C:0.00000165	T:0.00000260	0.0398366	761285	no	yes	yes	no
NIC258_IV:8734202:A->T_0229	yes.NIC258_IV:8734202:A->T_0229	NIC258	0.895343	268	24849		NIC258_IV	IV	A	T	1006008	17840	64	164	228	C:64	G:164	0.00407312	7.22e-05	C:0.00000026	G:0.00000066	487593	10715	C:64	G:157	0.00405231	8.91e-05	C:0.00000053	G:0.00000130	0.0174245	1023848	yes	yes	yes	yes
NIC258_V:11639247:G->A_0322	no.NIC258_V:11639247:G->A_0322	NIC258	0.895343	268	24849		NIC258_V	V	G	A	527328	20488	87	229	316	C:87	T:229	0.00213504	8.3e-05	C:0.00000035	T:0.00000093	289593	18866	C:87	T:222	0.00240676	0.00015679	C:0.00000072	T:0.00000185	0.0373994	547816	no	yes	yes	no
NIC260_II:12935467:A->T_0102	no.NIC260_II:12935467:A->T_0102	NIC260	0.908624	433	15301	0	NIC260_II	II	A	T	132471	274003	129	68	197	C:129	G:68	0.00053635	0.00110938	C:0.00000052	G:0.00000028	76820	157286	C:125	G:68	0.00063844	0.00130718	C:0.00000104	G:0.00000057	0.674097	406474	no	yes	yes	no
NIC260_IV:3955433:A->G_0189	no.NIC260_IV:3955433:A->G_0189	NIC260	0.908624	433	15301		NIC260_IV	IV	A	G	362817	588	120	128	248	C:120	T:128	0.00146897	2.38e-06	C:0.00000049	T:0.00000052	217826	445	C:120	T:128	0.00181032	3.7e-06	C:0.00000100	T:0.00000106	0.00161803	363405	no	yes	yes	no
NIC260_V:4630618:A->G_0253	no.NIC260_V:4630618:A->G_0253	NIC260	0.908624	433	15301		NIC260_V	V	A	G	1032975	1521	188	148	336	C:188	T:148	0.00418231	6.16e-06	C:0.00000076	T:0.00000060	475542	1065	C:188	T:148	0.00395215	8.85e-06	C:0.00000156	T:0.00000123	0.00147028	1034496	no	yes	yes	no
NIC260_X:6160622:C->G_0381	no.NIC260_X:6160622:C->G_0381	NIC260	0.908624	433	15301		NIC260_X	X	C	G	1433482	167097	1711	718	2429	A:1711	T:718	0.00580388	0.00067654	A:0.00000693	T:0.00000291	605220	88125	A:1408	T:702	0.00502989	0.00073239	A:0.00001170	T:0.00000583	0.104398	1600579	no	yes	yes	no
NIC261_II:14640296:T->C_0101	no.NIC261_II:14640296:T->C_0101	NIC261	0.906022	289	16675	1	NIC261_II	II	T	C	263746	43	102	74	176	A:102	G:74	0.00106785	1.7e-07	A:0.00000041	G:0.00000030	151326	43	A:102	G:74	0.00125765	3.6e-07	A:0.00000085	G:0.00000062	0.000163009	263789	no	yes	yes	no
NIC261_V:19431092:T->C_0303	no.NIC261_V:19431092:T->C_0303	NIC261	0.906022	289	16675		NIC261_V	V	T	C	1152252	63365	127	103	230	A:127	G:103	0.00466524	0.00025655	A:0.00000051	G:0.00000042	583912	41589	A:122	G:103	0.0048528	0.00034564	A:0.00000101	G:0.00000086	0.0521258	1215617	no	yes	yes	no
NIC261_X:4756862:G->C_0339	no.NIC261_X:4756862:G->C_0339	NIC261	0.906022	289	16675		NIC261_X	X	G	C	941389	139893	378	211	589	A:378	T:211	0.00381149	0.0005664	A:0.00000153	T:0.00000085	490541	79842	A:357	T:207	0.00407681	0.00066355	A:0.00000297	T:0.00000172	0.129377	1081282	no	yes	yes	no
NIC261_X:6698363:C->T_0352	yes.NIC261_X:6698363:C->T_0352	NIC261	0.906022	289	16675		NIC261_X	X	C	T	704001	10365	334	31	365	A:334	G:31	0.00285036	4.2e-05	A:0.00000135	G:0.00000013	362095	6237	A:251	G:30	0.00300931	5.18e-05	A:0.00000209	G:0.00000025	0.0145094	714366	yes	yes	yes	yes
NIC262_I:13467502:T->A_0073	yes.NIC262_I:13467502:T->A_0073	NIC262	0.910259	236	11355	3	NIC262_I	I	T	A	978355	10252	289	215	504	C:289	G:215	0.00396116	4.15e-05	C:0.00000117	G:0.00000087	471150	6219	C:288	G:215	0.00391565	5.17e-05	C:0.00000239	G:0.00000179	0.0103701	988607	yes	yes	yes	yes
NIC262_III:12674518:A->G_0306	yes.NIC262_III:12674518:A->G_0306	NIC262	0.910259	236	11355		NIC262_III	III	A	G	557466	5998	508	438	946	C:508	T:438	0.00225707	2.43e-05	C:0.00000206	T:0.00000177	312227	4021	C:506	T:438	0.00259487	3.34e-05	C:0.00000421	T:0.00000364	0.0106449	563464	yes	yes	yes	yes
NIC262_V:1331964:A->T_0421	no.NIC262_V:1331964:A->T_0421	NIC262	0.910259	236	11355		NIC262_V	V	A	T	328037	84	48	62	110	C:48	G:62	0.00132816	3.4e-07	C:0.00000019	G:0.00000025	176113	84	C:48	G:62	0.00146365	7e-07	C:0.00000040	G:0.00000052	0.000256003	328121	no	yes	yes	no
NIC262_X:7728993:G->A_0578	yes.NIC262_X:7728993:G->A_0578	NIC262	0.910259	236	11355		NIC262_X	X	G	A	940662	15449	192	315	507	C:192	T:315	0.00380855	6.26e-05	C:0.00000078	T:0.00000128	498609	9911	C:192	T:315	0.00414386	8.24e-05	C:0.00000160	T:0.00000262	0.0161582	956111	yes	yes	yes	yes
NIC265_I:2798111:G->A_0034	yes.NIC265_I:2798111:G->A_0034	NIC265	0.888841	1266	27611	3	NIC265_I	I	G	A	836228	9430	39	77	116	C:39	T:77	0.00338572	3.82e-05	C:0.00000016	T:0.00000031	403909	5378	C:38	T:74	0.00335682	4.47e-05	C:0.00000032	T:0.00000062	0.0111511	845658	yes	yes	yes	yes
NIC265_III:4655272:A->T_0908	yes.NIC265_III:4655272:A->T_0908	NIC265	0.888841	1266	27611		NIC265_III	III	A	T	510049	6447	176	220	396	C:176	G:220	0.00206509	2.61e-05	C:0.00000071	G:0.00000089	288743	4369	C:176	G:219	0.0023997	3.63e-05	C:0.00000146	G:0.00000182	0.0124822	516496	yes	yes	yes	yes
NIC265_IV:9592319:T->C_1022	yes.NIC265_IV:9592319:T->C_1022	NIC265	0.888841	1266	27611		NIC265_IV	IV	T	C	648306	8383	289	160	449	A:289	G:160	0.00262486	3.39e-05	A:0.00000117	G:0.00000065	333900	5148	A:288	G:160	0.00277499	4.28e-05	A:0.00000239	G:0.00000133	0.0127656	656689	yes	yes	yes	yes
NIC265_V:18883251:C->A_1202	no.NIC265_V:18883251:C->A_1202	NIC265	0.888841	1266	27611		NIC265_V	V	C	A	4358529	2357980	466141	18550	484691	G:466141	T:18550	0.0176468	0.00954699	G:0.00188731	T:0.00007511	1188937	793382	G:204210	T:9929	0.00988106	0.00659367	G:0.00169716	T:0.00008252	0.351072	6716509	no	no	no	no
NIC266_I:1355756:G->A_0019	no.NIC266_I:1355756:G->A_0019	NIC266	0.914802	601	8045	3	NIC266_I	I	G	A	7964	1942	1	2	3	C:1	T:2	3.22e-05	7.86e-06	C:0.00000000	T:0.00000001	4925	1220	C:1	T:2	4.09e-05	1.01e-05	C:0.00000001	T:0.00000002	0.196043	9906	no	no	yes	no
NIC266_III:6805834:G->A_0403	yes.NIC266_III:6805834:G->A_0403	NIC266	0.914802	601	8045		NIC266_III	III	G	A	249179	3864	9	32	41	C:9	T:32	0.00100888	1.56e-05	C:0.00000004	T:0.00000013	142791	2382	C:9	T:32	0.00118671	1.98e-05	C:0.00000007	T:0.00000027	0.0152701	253043	yes	yes	yes	yes
NIC266_V:5816119:A->G_0572	yes.NIC266_V:5816119:A->G_0572	NIC266	0.914802	601	8045		NIC266_V	V	A	G	537834	7592	70	56	126	C:70	T:56	0.00217758	3.07e-05	C:0.00000028	T:0.00000023	286510	4593	C:70	T:56	0.00238114	3.82e-05	C:0.00000058	T:0.00000047	0.0139194	545426	yes	yes	yes	yes
NIC266_X:1837854:T->G_0687	yes.NIC266_X:1837854:T->G_0687	NIC266	0.914802	601	8045		NIC266_X	X	T	G	505401	6351	94	91	185	A:94	C:91	0.00204627	2.57e-05	A:0.00000038	C:0.00000037	264749	3810	A:94	C:88	0.00220029	3.17e-05	A:0.00000078	C:0.00000073	0.0124103	511752	yes	yes	yes	yes
NIC268_I:3173368:G->T_0310	yes.NIC268_I:3173368:G->T_0310	NIC268	0.913477	5869	22853	3	NIC268_I	I	G	T	638517	10673	285	29	314	A:285	C:29	0.00258523	4.32e-05	A:0.00000115	C:0.00000012	313048	5886	A:281	C:29	0.00260169	4.89e-05	A:0.00000234	C:0.00000024	0.0164405	649190	yes	yes	yes	yes
NIC268_III:981275:G->T_1672	no.NIC268_III:981275:G->T_1672	NIC268	0.913477	5869	22853		NIC268_III	III	G	T	82226	113	6	9	15	A:6	C:9	0.00033292	4.6e-07	A:0.00000002	C:0.00000004	47536	112	A:5	C:9	0.00039506	9.3e-07	A:0.00000004	C:0.00000007	0.00137237	82339	no	yes	yes	no
NIC268_IV:2243367:G->A_2925	yes.NIC268_IV:2243367:G->A_2925	NIC268	0.913477	5869	22853		NIC268_IV	IV	G	A	397138	3636	88	163	251	C:88	T:163	0.00160793	1.47e-05	C:0.00000036	T:0.00000066	227397	2382	C:88	T:157	0.00188986	1.98e-05	C:0.00000073	T:0.00000130	0.00907245	400774	yes	yes	yes	yes
NIC268_V:16272328:A->G_6101	yes.NIC268_V:16272328:A->G_6101	NIC268	0.913477	5869	22853		NIC268_V	V	A	G	497766	7760	227	246	473	C:227	T:246	0.00201535	3.14e-05	C:0.00000092	T:0.00000100	284340	5270	C:227	T:243	0.0023631	4.38e-05	C:0.00000189	T:0.00000202	0.0153503	505526	yes	yes	yes	yes
NIC271_II:2168874:T->G_0096	yes.NIC271_II:2168874:T->G_0096	NIC271	0.915084	226	7107	4	NIC271_II	II	T	G	751795	2249	130	77	207	A:130	C:77	0.00304387	9.11e-06	A:0.00000053	C:0.00000031	370330	1409	A:130	C:77	0.00307775	1.17e-05	A:0.00000108	C:0.00000064	0.00298258	754044	yes	yes	yes	yes
NIC271_IV:1057576:G->T_0177	yes.NIC271_IV:1057576:G->T_0177	NIC271	0.915084	226	7107		NIC271_IV	IV	G	T	589375	7049	185	117	302	A:185	C:117	0.00238626	2.85e-05	A:0.00000075	C:0.00000047	282467	4088	A:180	C:114	0.00234754	3.4e-05	A:0.00000150	C:0.00000095	0.0118188	596424	yes	yes	yes	yes
NIC271_V:15537258:A->T_0278	yes.NIC271_V:15537258:A->T_0278	NIC271	0.915084	226	7107		NIC271_V	V	A	T	808058	24267	7	60	67	C:7	G:60	0.00327166	9.83e-05	C:0.00000003	G:0.00000024	406385	14876	C:7	G:60	0.0033774	0.00012363	C:0.00000006	G:0.00000050	0.0291557	832325	yes	yes	yes	yes
NIC271_X:11104026:T->C_0355	yes.NIC271_X:11104026:T->C_0355	NIC271	0.915084	226	7107		NIC271_X	X	T	C	413131	3503	66	51	117	A:66	G:51	0.00167268	1.42e-05	A:0.00000027	G:0.00000021	231455	2214	A:66	G:51	0.00192359	1.84e-05	A:0.00000055	G:0.00000042	0.00840786	416634	yes	yes	yes	yes
NIC3_I:10683375:G->A_0071	yes.NIC3_I:10683375:G->A_0071	NIC3	0.929202	1328	6791	4	NIC3_I	I	G	A	448730	4344	16	94	110	C:16	T:94	0.00181682	1.76e-05	C:0.00000006	T:0.00000038	264152	2859	C:16	T:93	0.00219532	2.38e-05	C:0.00000013	T:0.00000077	0.00958784	453074	yes	yes	yes	yes
NIC3_II:4040840:T->C_0649	yes.NIC3_II:4040840:T->C_0649	NIC3	0.929202	1328	6791		NIC3_II	II	T	C	375766	1585	148	89	237	A:148	G:89	0.0015214	6.42e-06	A:0.00000060	G:0.00000036	218548	1012	A:148	G:89	0.00181632	8.41e-06	A:0.00000123	G:0.00000074	0.00420033	377351	yes	yes	yes	yes
NIC3_III:4243615:A->G_0884	yes.NIC3_III:4243615:A->G_0884	NIC3	0.929202	1328	6791		NIC3_III	III	A	G	219065	1578	18	16	34	C:18	T:16	0.00088695	6.39e-06	C:0.00000007	T:0.00000006	124396	953	C:18	T:16	0.00103384	7.92e-06	C:0.00000015	T:0.00000013	0.00715182	220643	yes	yes	yes	yes
NIC3_IV:7130827:G->A_1075	yes.NIC3_IV:7130827:G->A_1075	NIC3	0.929202	1328	6791		NIC3_IV	IV	G	A	218673	1993	16	59	75	C:16	T:59	0.00088536	8.07e-06	C:0.00000006	T:0.00000024	139737	1286	C:16	T:50	0.00116133	1.07e-05	C:0.00000013	T:0.00000042	0.00903175	220666	yes	yes	yes	yes
NIC501_I:996739:G->A_0013	yes.NIC501_I:996739:G->A_0013	NIC501	0.920145	786	7085	4	NIC501_I	I	G	A	186038	2331	3	9	12	C:3	T:9	0.00075323	9.44e-06	C:0.00000001	T:0.00000004	109613	1459	C:3	T:9	0.00091098	1.21e-05	C:0.00000002	T:0.00000007	0.0123746	188369	yes	yes	yes	yes
NIC501_II:771763:C->T_0067	yes.NIC501_II:771763:C->T_0067	NIC501	0.920145	786	7085		NIC501_II	II	C	T	772696	7989	342	18	360	A:342	G:18	0.00312849	3.24e-05	A:0.00000138	G:0.00000007	415446	5225	A:271	G:18	0.0034527	4.34e-05	A:0.00000225	G:0.00000015	0.0102333	780685	yes	yes	yes	yes
NIC501_IV:5751338:G->T_0240	yes.NIC501_IV:5751338:G->T_0240	NIC501	0.920145	786	7085		NIC501_IV	IV	G	T	1105490	10837	131	19	150	A:131	C:19	0.00447591	4.39e-05	A:0.00000053	C:0.00000008	492435	6440	A:120	C:19	0.00409255	5.35e-05	A:0.00000100	C:0.00000016	0.00970773	1116327	yes	yes	yes	yes
NIC501_V:7186913:T->A_0640	yes.NIC501_V:7186913:T->A_0640	NIC501	0.920145	786	7085		NIC501_V	V	T	A	271846	2614	25	27	52	C:25	G:27	0.00110065	1.06e-05	C:0.00000010	G:0.00000011	180010	1967	C:25	G:27	0.00149603	1.64e-05	C:0.00000021	G:0.00000022	0.00952416	274460	yes	yes	yes	yes
NIC523_I:9329936:G->A_0079	yes.NIC523_I:9329936:G->A_0079	NIC523	0.922159	900	10660	3	NIC523_I	I	G	A	933880	11766	37	162	199	C:37	T:162	0.00378109	4.76e-05	C:0.00000015	T:0.00000066	437430	6843	C:37	T:158	0.00363541	5.69e-05	C:0.00000031	T:0.00000131	0.0124423	945646	yes	yes	yes	yes
NIC523_II:3632053:A->T,C_0353	no.NIC523_II:3632053:A->T,C_0353	NIC523	0.922159	900	10660		NIC523_II	II	A	T	788761	10994	77963	155	78118	C:77963	G:155	0.00319353	4.45e-05	C:0.00031566	G:0.00000063	402447	6619	C:40304	G:155	0.00334467	5.5e-05	C:0.00033496	G:0.00000129	0.0137467	799755	yes	yes	no	no
NIC523_III:6373316:C->T_0465	yes.NIC523_III:6373316:C->T_0465	NIC523	0.922159	900	10660		NIC523_III	III	C	T	481450	5784	297	34	331	A:297	G:34	0.00194929	2.34e-05	A:0.00000120	G:0.00000014	295902	3962	A:277	G:34	0.00245919	3.29e-05	A:0.00000230	G:0.00000028	0.0118711	487234	yes	yes	yes	yes
NIC523_IV:1672445:A->T_0546	yes.NIC523_IV:1672445:A->T_0546	NIC523	0.922159	900	10660		NIC523_IV	IV	A	T	799820	10529	50	91	141	C:50	G:91	0.00323831	4.26e-05	C:0.00000020	G:0.00000037	393621	5907	C:50	G:91	0.00327132	4.91e-05	C:0.00000042	G:0.00000076	0.0129932	810349	yes	yes	yes	yes
NIC526_I:10925254:T->A_0094	yes.NIC526_I:10925254:T->A_0094	NIC526	0.929856	1269	6069	3	NIC526_I	I	T	A	163578	2048	25	42	67	C:25	G:42	0.00066229	8.29e-06	C:0.00000010	G:0.00000017	99106	1320	C:25	G:42	0.00082365	1.1e-05	C:0.00000021	G:0.00000035	0.0123652	165626	yes	yes	yes	yes
NIC526_III:6091436:G->A_0324	yes.NIC526_III:6091436:G->A_0324	NIC526	0.929856	1269	6069		NIC526_III	III	G	A	665540	7042	12	36	48	C:12	T:36	0.00269464	2.85e-05	C:0.00000005	T:0.00000015	369863	4569	C:12	T:35	0.00307387	3.8e-05	C:0.00000010	T:0.00000029	0.0104701	672582	yes	yes	yes	yes
NIC526_IV:4015508:C->T_0953	yes.NIC526_IV:4015508:C->T_0953	NIC526	0.929856	1269	6069		NIC526_IV	IV	C	T	640656	7198	712	82	794	A:712	G:82	0.00259389	2.91e-05	A:0.00000288	G:0.00000033	343064	4421	A:629	G:82	0.00285115	3.67e-05	A:0.00000523	G:0.00000068	0.0111105	647854	yes	yes	yes	yes
NIC526_V:15578221:C->A_1167	no.NIC526_V:15578221:C->A_1167	NIC526	0.929856	1269	6069		NIC526_V	V	C	A	1323650	487149	157	191	348	G:157	T:191	0.00535919	0.00197237	G:0.00000064	T:0.00000077	582999	256346	G:156	T:191	0.00484521	0.00213045	G:0.00000130	T:0.00000159	0.269024	1810799	no	yes	yes	no
NIC527_I:1958596:G->T_0060	yes.NIC527_I:1958596:G->T_0060	NIC527	0.927649	1087	4659	4	NIC527_I	I	G	T	594505	8555	320	209	529	A:320	C:209	0.00240703	3.46e-05	A:0.00000130	C:0.00000085	313109	5311	A:320	C:200	0.0026022	4.41e-05	A:0.00000266	C:0.00000166	0.014186	603060	yes	yes	yes	yes
NIC527_II:15130732:G->A_0346	yes.NIC527_II:15130732:G->A_0346	NIC527	0.927649	1087	4659		NIC527_II	II	G	A	407815	6179	85	134	219	C:85	T:134	0.00165116	2.5e-05	C:0.00000034	T:0.00000054	230130	3838	C:85	T:133	0.00191257	3.19e-05	C:0.00000071	T:0.00000111	0.0149253	413994	yes	yes	yes	yes
NIC527_III:12663742:A->G_0503	yes.NIC527_III:12663742:A->G_0503	NIC527	0.927649	1087	4659		NIC527_III	III	A	G	700448	8241	364	418	782	C:364	T:418	0.00283597	3.34e-05	C:0.00000147	T:0.00000169	357063	5062	C:364	T:418	0.00296749	4.21e-05	C:0.00000303	T:0.00000347	0.0116285	708689	yes	yes	yes	yes
NIC527_X:13209174:A->G_0927	yes.NIC527_X:13209174:A->G_0927	NIC527	0.927649	1087	4659		NIC527_X	X	A	G	564132	6420	107	118	225	C:107	T:118	0.00228406	2.6e-05	C:0.00000043	T:0.00000048	363162	4881	C:107	T:118	0.00301818	4.06e-05	C:0.00000089	T:0.00000098	0.0112523	570552	yes	yes	yes	yes
NIC528_I:2704295:G->A_0039	yes.NIC528_I:2704295:G->A_0039	NIC528	0.926598	971	7801	3	NIC528_I	I	G	A	364587	11020	9	151	160	C:9	T:151	0.00147614	4.46e-05	C:0.00000004	T:0.00000061	205942	7387	C:9	T:151	0.00171155	6.14e-05	C:0.00000007	T:0.00000125	0.0293392	375607	yes	yes	yes	yes
NIC528_II:3724861:A->T_0162	no.NIC528_II:3724861:A->T_0162	NIC528	0.926598	971	7801		NIC528_II	II	A	T	79920	12	9	16	25	C:9	G:16	0.00032358	5e-08	C:0.00000004	G:0.00000006	49048	12	C:9	G:16	0.00040763	1e-07	C:0.00000007	G:0.00000013	0.000150128	79932	no	yes	yes	no
NIC528_III:12090503:A->T_0412	yes.NIC528_III:12090503:A->T_0412	NIC528	0.926598	971	7801		NIC528_III	III	A	T	259251	7029	73	228	301	C:73	G:228	0.00104966	2.85e-05	C:0.00000030	G:0.00000092	161389	4436	C:73	G:228	0.00134128	3.69e-05	C:0.00000061	G:0.00000189	0.026397	266280	yes	yes	yes	yes
NIC528_IV:875241:A->T_0433	yes.NIC528_IV:875241:A->T_0433	NIC528	0.926598	971	7801		NIC528_IV	IV	A	T	944730	21644	191	400	591	C:191	G:400	0.00382502	8.76e-05	C:0.00000077	G:0.00000162	449424	12882	C:191	G:398	0.00373509	0.00010706	C:0.00000159	G:0.00000331	0.0223971	966374	yes	yes	yes	yes
PB306_I:12851348:G->C_0291	yes.PB306_I:12851348:G->C_0291	PB306	0.918868	4183	15183	3	PB306_I	I	G	C	780642	6173	355	214	569	A:355	T:214	0.00316066	2.5e-05	A:0.00000144	T:0.00000087	380621	3691	A:348	T:208	0.00316328	3.07e-05	A:0.00000289	T:0.00000173	0.00784556	786815	yes	yes	yes	yes
PB306_III:728665:T->A_0392	no.PB306_III:728665:T->A_0392	PB306	0.918868	4183	15183		PB306_III	III	T	A	602148	136495	165	223	388	C:165	G:223	0.00243798	0.00055264	C:0.00000067	G:0.00000090	310713	94565	C:165	G:223	0.00258229	0.00078591	C:0.00000137	G:0.00000185	0.184792	738643	no	yes	yes	no
PB306_V:215642:T->A_0783	yes.PB306_V:215642:T->A_0783	PB306	0.918868	4183	15183		PB306_V	V	T	A	443145	4524	97	199	296	C:97	G:199	0.0017942	1.83e-05	C:0.00000039	G:0.00000081	222168	2597	C:94	G:199	0.0018464	2.16e-05	C:0.00000078	G:0.00000165	0.0101057	447669	yes	yes	yes	yes
PB306_X:7292254:G->A_3184	yes.PB306_X:7292254:G->A_3184	PB306	0.918868	4183	15183		PB306_X	X	G	A	462539	5698	11	91	102	C:11	T:91	0.00187273	2.31e-05	C:0.00000004	T:0.00000037	255208	3625	C:11	T:89	0.00212099	3.01e-05	C:0.00000009	T:0.00000074	0.0121691	468237	yes	yes	yes	yes
PS2025_I:5273967:C->T_0025	yes.PS2025_I:5273967:C->T_0025	PS2025	0.90822	578	21786	3	PS2025_I	I	C	T	867539	5682	445	35	480	A:445	G:35	0.00351249	2.3e-05	A:0.00000180	G:0.00000014	439229	3494	A:371	G:33	0.00365036	2.9e-05	A:0.00000308	G:0.00000027	0.00650694	873221	yes	yes	yes	yes
PS2025_II:14240702:A->T_0102	yes.PS2025_II:14240702:A->T_0102	PS2025	0.90822	578	21786		PS2025_II	II	A	T	1130926	8935	9	86	95	C:9	G:86	0.00457889	3.62e-05	C:0.00000004	G:0.00000035	524164	5148	C:9	G:86	0.00435624	4.28e-05	C:0.00000007	G:0.00000071	0.00783867	1139861	yes	yes	yes	yes
PS2025_V:470556:C->T_0189	no.PS2025_V:470556:C->T_0189	PS2025	0.90822	578	21786		PS2025_V	V	C	T	220570	28	197	13	210	A:197	G:13	0.00089304	1.1e-07	A:0.00000080	G:0.00000005	135195	28	A:168	G:13	0.00112358	2.3e-07	A:0.00000140	G:0.00000011	0.000126928	220598	no	yes	yes	no
PS2025_X:3374865:G->A_0334	yes.PS2025_X:3374865:G->A_0334	PS2025	0.90822	578	21786		PS2025_X	X	G	A	473629	3117	17	86	103	C:17	T:86	0.00191763	1.26e-05	C:0.00000007	T:0.00000035	276181	2074	C:17	T:86	0.0022953	1.72e-05	C:0.00000014	T:0.00000071	0.00653807	476746	yes	yes	yes	yes
QG2075_II:13023115:C->T_0341	yes.QG2075_II:13023115:C->T_0341	QG2075	0.916892	1908	9620	4	QG2075_II	II	C	T	438427	6050	240	22	262	A:240	G:22	0.0017751	2.45e-05	A:0.00000097	G:0.00000009	263020	3968	A:199	G:22	0.00218592	3.3e-05	A:0.00000165	G:0.00000018	0.0136115	444477	yes	yes	yes	yes
QG2075_III:3339861:G->A_0603	yes.QG2075_III:3339861:G->A_0603	QG2075	0.916892	1908	9620		QG2075_III	III	G	A	481458	5409	15	54	69	C:15	T:54	0.00194933	2.19e-05	C:0.00000006	T:0.00000022	272052	3402	C:14	T:52	0.00226098	2.83e-05	C:0.00000012	T:0.00000043	0.0111098	486867	yes	yes	yes	yes
QG2075_V:9402546:G->C_1072	yes.QG2075_V:9402546:G->C_1072	QG2075	0.916892	1908	9620		QG2075_V	V	G	C	735190	10361	197	142	339	A:197	T:142	0.00297664	4.2e-05	A:0.00000080	T:0.00000057	416630	6797	A:188	T:141	0.00346255	5.65e-05	A:0.00000156	T:0.00000117	0.0138971	745551	yes	yes	yes	yes
QG2075_X:11406264:G->T_1683	yes.QG2075_X:11406264:G->T_1683	QG2075	0.916892	1908	9620		QG2075_X	X	G	T	1497201	20103	318	27	345	A:318	C:27	0.00606187	8.14e-05	A:0.00000129	C:0.00000011	633260	10512	A:303	C:27	0.00526292	8.74e-05	A:0.00000252	C:0.00000022	0.0132492	1517304	yes	yes	yes	yes
QG556_I:9482067:G->A_0167	yes.QG556_I:9482067:G->A_0167	QG556	0.912732	2672	25835	3	QG556_I	I	G	A	1135905	17529	178	561	739	C:178	T:561	0.00459905	7.1e-05	C:0.00000072	T:0.00000227	482610	10281	C:178	T:552	0.00401089	8.54e-05	C:0.00000148	T:0.00000459	0.0151972	1153434	yes	yes	yes	yes
QG556_II:1831610:A->G_0478	no.QG556_II:1831610:A->G_0478	QG556	0.912732	2672	25835		QG556_II	II	A	G	265297	31	21	23	44	C:21	T:23	0.00107413	1.3e-07	C:0.00000009	T:0.00000009	157157	31	C:21	T:23	0.00130611	2.6e-07	C:0.00000017	T:0.00000019	0.000116837	265328	no	yes	yes	no
QG556_III:5846768:G->A_0765	yes.QG556_III:5846768:G->A_0765	QG556	0.912732	2672	25835		QG556_III	III	G	A	539713	7895	113	267	380	C:113	T:267	0.00218519	3.2e-05	C:0.00000046	T:0.00000108	284828	5242	C:113	T:267	0.00236716	4.36e-05	C:0.00000094	T:0.00000222	0.0144172	547608	yes	yes	yes	yes
QG556_V:14482460:C->A_1014	yes.QG556_V:14482460:C->A_1014	QG556	0.912732	2672	25835		QG556_V	V	C	A	1019263	16055	56	77	133	G:56	T:77	0.00412679	6.5e-05	G:0.00000023	T:0.00000031	481754	10061	G:53	T:77	0.00400378	8.36e-05	G:0.00000044	T:0.00000064	0.0155073	1035318	yes	yes	yes	yes
QW947_I:2764624:A->G_0031	no.QW947_I:2764624:A->G_0031	QW947	0.925069	1001	9891	3	QW947_I	I	A	G	1281	16	0	0	0	C:0	T:0	5.19e-06	6e-08	C:0	T:0	828	13	C:0	T:0	6.88e-06	1.1e-07	C:0	T:0	0.0123362	1297	yes	no	yes	no
QW947_II:10076961:G->A_0179	yes.QW947_II:10076961:G->A_0179	QW947	0.925069	1001	9891		QW947_II	II	G	A	517090	9098	9	31	40	C:9	T:31	0.00209359	3.68e-05	C:0.00000004	T:0.00000013	250456	5435	C:9	T:31	0.0020815	4.52e-05	C:0.00000007	T:0.00000026	0.0172904	526188	yes	yes	yes	yes
QW947_III:8588601:A->T_0344	yes.QW947_III:8588601:A->T_0344	QW947	0.925069	1001	9891		QW947_III	III	A	T	737361	10396	149	183	332	C:149	G:183	0.00298543	4.21e-05	C:0.00000060	G:0.00000074	378217	6355	C:149	G:183	0.0031433	5.28e-05	C:0.00000124	G:0.00000152	0.0139029	747757	yes	yes	yes	yes
QW947_V:20143320:C->A_0914	yes.QW947_V:20143320:C->A_0914	QW947	0.925069	1001	9891		QW947_V	V	C	A	431305	10201	24	45	69	G:24	T:45	0.00174627	4.13e-05	G:0.00000010	T:0.00000018	240349	6294	G:15	T:43	0.0019975	5.23e-05	G:0.00000012	T:0.00000036	0.023105	441506	yes	yes	yes	yes
QX1211_I:1493658:G->T_0246	yes.QX1211_I:1493658:G->T_0246	QX1211	0.778488	24381	205079	3	QX1211_I	I	G	T	35610	235	7	2	9	A:7	C:2	0.00014418	9.5e-07	A:0.00000003	C:0.00000001	21625	136	A:7	C:2	0.00017972	1.13e-06	A:0.00000006	C:0.00000002	0.00655601	35845	yes	yes	yes	yes
QX1211_II:12688383:G->A_7945	yes.QX1211_II:12688383:G->A_7945	QX1211	0.778488	24381	205079		QX1211_II	II	G	A	626412	4177	9	37	46	C:9	T:37	0.00253622	1.69e-05	C:0.00000004	T:0.00000015	328901	2634	C:9	T:37	0.00273344	2.19e-05	C:0.00000007	T:0.00000031	0.00662397	630589	yes	yes	yes	yes
QX1211_III:7161291:G->A_8933	no.QX1211_III:7161291:G->A_8933	QX1211	0.778488	24381	205079		QX1211_III	III	G	A	350720	14833	10	50	60	C:10	T:50	0.00141999	6.01e-05	C:0.00000004	T:0.00000020	209737	9500	C:10	T:50	0.00174309	7.9e-05	C:0.00000008	T:0.00000042	0.0405769	365553	no	yes	yes	no
QX1211_V:972161:C->T_10484	yes.QX1211_V:972161:C->T_10484	QX1211	0.778488	24381	205079		QX1211_V	V	C	T	336470	1619	174	37	211	A:174	G:37	0.0013623	6.56e-06	A:0.00000070	G:0.00000015	176815	980	A:150	G:37	0.00146948	8.14e-06	A:0.00000125	G:0.00000031	0.00478868	338089	yes	yes	yes	yes
QX1212_I:13367217:G->A_0090	yes.QX1212_I:13367217:G->A_0090	QX1212	0.918666	3169	12282	3	QX1212_I	I	G	A	108221	485	6	9	15	C:6	T:9	0.00043817	1.96e-06	C:0.00000002	T:0.00000004	68349	336	C:6	T:9	0.00056804	2.79e-06	C:0.00000005	T:0.00000007	0.00446157	108706	yes	yes	yes	yes
QX1212_III:13757437:C->T_0418	yes.QX1212_III:13757437:C->T_0418	QX1212	0.918666	3169	12282		QX1212_III	III	C	T	769016	2244	633	59	692	A:633	G:59	0.00311359	9.09e-06	A:0.00000256	G:0.00000024	405497	1460	A:548	G:57	0.00337002	1.21e-05	A:0.00000455	G:0.00000047	0.00290953	771260	yes	yes	yes	yes
QX1212_V:3230994:G->T_0503	no.QX1212_V:3230994:G->T_0503	QX1212	0.918666	3169	12282		QX1212_V	V	G	T	381948	52	7143	16	7159	A:7143	C:16	0.00154643	2.1e-07	A:0.00002892	C:0.00000006	200190	52	A:4173	C:16	0.00166375	4.3e-07	A:0.00003468	C:0.00000013	0.000136126	382000	no	yes	yes	no
QX1212_X:8724308:G->T_3126	yes.QX1212_X:8724308:G->T_3126	QX1212	0.918666	3169	12282		QX1212_X	X	G	T	1383432	5493	417	180	597	A:417	C:180	0.00560124	2.22e-05	A:0.00000169	C:0.00000073	601671	3281	A:414	C:176	0.00500039	2.73e-05	A:0.00000344	C:0.00000146	0.00395486	1388925	yes	yes	yes	yes
QX1791_I:4539333:A->G_0704	yes.QX1791_I:4539333:A->G_0704	QX1791	0.877424	22534	65722	2	QX1791_I	I	A	G	344997	2307	5	31	36	C:5	T:31	0.00139682	9.34e-06	C:0.00000002	T:0.00000013	178295	1343	C:5	T:30	0.00148178	1.12e-05	C:0.00000004	T:0.00000025	0.0066426	347304	yes	yes	yes	yes
QX1791_II:2298913:A->C_2923	no.QX1791_II:2298913:A->C_2923	QX1791	0.877424	22534	65722		QX1791_II	II	A	C	130763	22	30	23	53	G:30	T:23	0.00052943	9e-08	G:0.00000012	T:0.00000009	71778	22	G:30	T:23	0.00059654	1.8e-07	G:0.00000025	T:0.00000019	0.000168215	130785	no	yes	yes	no
QX1791_III:1745381:C->T_6106	yes.QX1791_III:1745381:C->T_6106	QX1791	0.877424	22534	65722		QX1791_III	III	C	T	805507	6009	487	45	532	A:487	G:45	0.00326134	2.43e-05	A:0.00000197	G:0.00000018	422271	3673	A:378	G:45	0.00350943	3.05e-05	A:0.00000314	G:0.00000037	0.00740466	811516	yes	yes	yes	yes
QX1791_IV:418983:A->T_7248	no.QX1791_IV:418983:A->T_7248	QX1791	0.877424	22534	65722		QX1791_IV	IV	A	T	528509	158308	27	76	103	C:27	G:76	0.00213983	0.00064096	C:0.00000011	G:0.00000031	293330	96204	C:27	G:76	0.00243782	0.00079954	C:0.00000022	G:0.00000063	0.230495	686817	no	yes	yes	no
QX1792_I:8420710:T->A_0096	yes.QX1792_I:8420710:T->A_0096	QX1792	0.907213	6298	23649	3	QX1792_I	I	T	A	1123103	10596	101	153	254	C:101	G:153	0.00454722	4.29e-05	C:0.00000041	G:0.00000062	526420	6152	C:97	G:153	0.00437499	5.11e-05	C:0.00000081	G:0.00000127	0.0093464	1133699	yes	yes	yes	yes
QX1792_II:4322013:A->G_1082	yes.QX1792_II:4322013:A->G_1082	QX1792	0.907213	6298	23649		QX1792_II	II	A	G	228277	1943	38	24	62	C:38	T:24	0.00092425	7.87e-06	C:0.00000015	T:0.00000010	145798	1338	C:38	T:24	0.0012117	1.11e-05	C:0.00000032	T:0.00000020	0.00843975	230220	yes	yes	yes	yes
QX1792_III:1890559:C->T_2917	yes.QX1792_III:1890559:C->T_2917	QX1792	0.907213	6298	23649		QX1792_III	III	C	T	67345	936	24	4	28	A:24	G:4	0.00027267	3.79e-06	A:0.00000010	G:0.00000002	42096	580	A:23	G:4	0.00034985	4.82e-06	A:0.00000019	G:0.00000003	0.0137081	68281	yes	yes	yes	yes
QX1792_IV:16954874:G->A_5327	no.QX1792_IV:16954874:G->A_5327	QX1792	0.907213	6298	23649		QX1792_IV	IV	G	A	0	0	0	0	0	C:0	T:0	0	0	C:0	T:0	0	0	C:0	T:0	0	0	C:0	T:0			no	no	yes	no
QX1793_I:2317202:T->A_0058	yes.QX1793_I:2317202:T->A_0058	QX1793	0.90117	7598	29887	4	QX1793_I	I	T	A	527437	6413	167	129	296	C:167	G:129	0.00213549	2.6e-05	C:0.00000068	G:0.00000052	285158	4047	C:167	G:129	0.0023699	3.36e-05	C:0.00000139	G:0.00000107	0.0120127	533850	yes	yes	yes	yes
QX1793_II:14427804:T->C_2011	yes.QX1793_II:14427804:T->C_2011	QX1793	0.90117	7598	29887		QX1793_II	II	T	C	789353	10375	903	704	1607	A:903	G:704	0.00319593	4.2e-05	A:0.00000366	G:0.00000285	390351	6322	A:903	G:704	0.00324414	5.25e-05	A:0.00000750	G:0.00000585	0.0129732	799728	yes	yes	yes	yes
QX1793_III:3898860:A->G_2193	yes.QX1793_III:3898860:A->G_2193	QX1793	0.90117	7598	29887		QX1793_III	III	A	G	1027148	10510	126	231	357	C:126	T:231	0.00415872	4.26e-05	C:0.00000051	T:0.00000094	481563	6138	C:126	T:223	0.00400219	5.1e-05	C:0.00000105	T:0.00000185	0.0101286	1037658	yes	yes	yes	yes
QX1793_IV:14317301:A->T_3565	yes.QX1793_IV:14317301:A->T_3565	QX1793	0.90117	7598	29887		QX1793_IV	IV	A	T	29869	355	1	6	7	C:1	G:6	0.00012093	1.44e-06	C:0.00000000	G:0.00000002	20873	246	C:1	G:6	0.00017347	2.04e-06	C:0.00000001	G:0.00000005	0.0117456	30224	yes	yes	yes	yes
QX1794_II:3609977:A->C_1056	yes.QX1794_II:3609977:A->C_1056	QX1794	0.903286	3767	21053	4	QX1794_II	II	A	C	488379	2852	205	179	384	G:205	T:179	0.00197735	1.16e-05	G:0.00000083	T:0.00000072	286779	1934	G:205	T:179	0.00238337	1.61e-05	G:0.00000170	T:0.00000149	0.00580582	491231	yes	yes	yes	yes
QX1794_III:6442022:C->G_2147	yes.QX1794_III:6442022:C->G_2147	QX1794	0.903286	3767	21053		QX1794_III	III	C	G	750957	3782	371	100	471	A:371	T:100	0.00304047	1.53e-05	A:0.00000150	T:0.00000040	393786	2293	A:283	T:98	0.00327269	1.91e-05	A:0.00000235	T:0.00000081	0.005011	754739	yes	yes	yes	yes
QX1794_IV:14531808:C->T_3155	yes.QX1794_IV:14531808:C->T_3155	QX1794	0.903286	3767	21053		QX1794_IV	IV	C	T	349611	2087	146	47	193	A:146	G:47	0.0014155	8.45e-06	A:0.00000059	G:0.00000019	197957	1337	A:127	G:47	0.00164519	1.11e-05	A:0.00000106	G:0.00000039	0.00593407	351698	yes	yes	yes	yes
QX1794_X:10377801:A->C_3903	yes.QX1794_X:10377801:A->C_3903	QX1794	0.903286	3767	21053		QX1794_X	X	A	C	600152	3740	259	129	388	G:259	T:129	0.00242989	1.51e-05	G:0.00000105	T:0.00000052	332301	2426	G:258	T:129	0.0027617	2.02e-05	G:0.00000214	T:0.00000107	0.00619316	603892	yes	yes	yes	yes
WN2001_II:1915462:G->C_0106	no.WN2001_II:1915462:G->C_0106	WN2001	0.909835	2121	16397	1	WN2001_II	II	G	C	138999	3	17	54	71	A:17	T:54	0.00056278	1e-08	A:0.00000007	T:0.00000022	87705	3	A:16	T:44	0.0007289	2e-08	A:0.00000013	T:0.00000037	2.16e-05	139002	no	yes	yes	no
WN2001_III:1714868:A->C_0280	no.WN2001_III:1714868:A->C_0280	WN2001	0.909835	2121	16397		WN2001_III	III	A	C	190510	253	53	20	73	G:53	T:20	0.00077134	1.02e-06	G:0.00000021	T:0.00000008	115377	229	G:51	T:20	0.00095888	1.9e-06	G:0.00000042	T:0.00000017	0.00132625	190763	no	yes	yes	no
WN2001_V:5142850:T->A_1227	yes.WN2001_V:5142850:T->A_1227	WN2001	0.909835	2121	16397		WN2001_V	V	T	A	640496	4743	69	41	110	C:69	G:41	0.00259324	1.92e-05	C:0.00000028	G:0.00000017	350106	2949	C:69	G:41	0.00290967	2.45e-05	C:0.00000057	G:0.00000034	0.00735077	645239	yes	yes	yes	yes
WN2001_X:9413829:A->C_1732	no.WN2001_X:9413829:A->C_1732	WN2001	0.909835	2121	16397		WN2001_X	X	A	C	613919	87277	109	30	139	G:109	T:30	0.00248563	0.00035337	G:0.00000044	T:0.00000012	314609	50570	G:106	T:30	0.00261466	0.00042028	G:0.00000088	T:0.00000025	0.124469	701196	no	yes	yes	no
XZ1513_I:1658407:T->A_0017	no.XZ1513_I:1658407:T->A_0017	XZ1513	0.897054	3092	31813	2	XZ1513_I	I	T	A	823492	632	3121	189	3310	C:3121	G:189	0.00333415	2.56e-06	C:0.00001264	G:0.00000077	315507	393	C:1532	G:189	0.00262213	3.27e-06	C:0.00001273	G:0.00000157	0.000766875	824124	no	yes	yes	no
XZ1513_II:3924448:T->A_0587	yes.XZ1513_II:3924448:T->A_0587	XZ1513	0.897054	3092	31813		XZ1513_II	II	T	A	1021407	10500	93	164	257	C:93	G:164	0.00413547	4.25e-05	C:0.00000038	G:0.00000066	493243	6237	C:93	G:164	0.00409926	5.18e-05	C:0.00000077	G:0.00000136	0.0101753	1031907	yes	yes	yes	yes
XZ1513_V:19369709:C->G_2258	no.XZ1513_V:19369709:C->G_2258	XZ1513	0.897054	3092	31813		XZ1513_V	V	C	G	76970	142	57	23	80	A:57	T:23	0.00031164	5.7e-07	A:0.00000023	T:0.00000009	43264	85	A:48	T:23	0.00035956	7.1e-07	A:0.00000040	T:0.00000019	0.00184148	77112	no	yes	yes	no
XZ1513_X:11024830:G->A_2766	yes.XZ1513_X:11024830:G->A_2766	XZ1513	0.897054	3092	31813		XZ1513_X	X	G	A	539564	5659	19	41	60	C:19	T:41	0.00218459	2.29e-05	C:0.00000008	T:0.00000017	293696	3425	C:18	T:30	0.00244086	2.85e-05	C:0.00000015	T:0.00000025	0.0103792	545223	yes	yes	yes	yes
XZ1514_I:2833139:C->T_1997	yes.XZ1514_I:2833139:C->T_1997	XZ1514	0.77264	48183	216364	4	XZ1514_I	I	C	T	437834	4011	230	19	249	A:230	G:19	0.0017727	1.62e-05	A:0.00000093	G:0.00000008	247957	2538	A:184	G:19	0.00206073	2.11e-05	A:0.00000153	G:0.00000016	0.00907784	441845	yes	yes	yes	yes
XZ1514_II:2134220:A->C_7608	yes.XZ1514_II:2134220:A->C_7608	XZ1514	0.77264	48183	216364		XZ1514_II	II	A	C	235290	6816	26	22	48	G:26	T:22	0.00095264	2.76e-05	G:0.00000011	T:0.00000009	137673	4144	G:26	T:22	0.00114418	3.44e-05	G:0.00000022	T:0.00000018	0.028153	242106	yes	yes	yes	yes
XZ1514_III:11917940:T->A_17136	yes.XZ1514_III:11917940:T->A_17136	XZ1514	0.77264	48183	216364		XZ1514_III	III	T	A	649672	5571	69	76	145	C:69	G:76	0.00263039	2.26e-05	C:0.00000028	G:0.00000031	318364	3202	C:67	G:76	0.00264587	2.66e-05	C:0.00000056	G:0.00000063	0.00850219	655243	yes	yes	yes	yes
XZ1514_IV:4851047:A->G_20618	yes.XZ1514_IV:4851047:A->G_20618	XZ1514	0.77264	48183	216364		XZ1514_IV	IV	A	G	797667	7504	176	187	363	C:176	T:187	0.00322959	3.04e-05	C:0.00000071	T:0.00000076	404840	4589	C:176	T:187	0.00336456	3.81e-05	C:0.00000146	T:0.00000155	0.00931976	805171	yes	yes	yes	yes
XZ1515_I:14784181:T->A_2548	no.XZ1515_I:14784181:T->A_2548	XZ1515	0.895364	16233	44125	3	XZ1515_I	I	T	A	0	0	0	0	0	C:0	G:0	0	0	C:0	G:0	0	0	C:0	G:0	0	0	C:0	G:0			no	no	yes	no
XZ1515_II:2854786:C->A_2956	yes.XZ1515_II:2854786:C->A_2956	XZ1515	0.895364	16233	44125		XZ1515_II	II	C	A	411778	3534	7	26	33	G:7	T:26	0.00166721	1.43e-05	G:0.00000003	T:0.00000011	254490	2349	G:7	T:26	0.00211503	1.95e-05	G:0.00000006	T:0.00000022	0.00850927	415312	yes	yes	yes	yes
XZ1515_IV:5669898:G->T_3597	yes.XZ1515_IV:5669898:G->T_3597	XZ1515	0.895364	16233	44125		XZ1515_IV	IV	G	T	359856	3245	220	21	241	A:220	C:21	0.00145698	1.31e-05	A:0.00000089	C:0.00000009	214257	2182	A:220	C:21	0.00178066	1.81e-05	A:0.00000183	C:0.00000017	0.00893691	363101	yes	yes	yes	yes
XZ1515_X:2664105:A->T_7071	yes.XZ1515_X:2664105:A->T_7071	XZ1515	0.895364	16233	44125		XZ1515_X	X	A	T	813140	6973	52	70	122	C:52	G:70	0.00329224	2.82e-05	C:0.00000021	G:0.00000028	390455	4030	C:52	G:70	0.00324501	3.35e-05	C:0.00000043	G:0.00000058	0.00850249	820113	yes	yes	yes	yes
XZ1516_I:13002705:A->T_13072	yes.XZ1516_I:13002705:A->T_13072	XZ1516	0.684538	185245	348932	3	XZ1516_I	I	A	T	674352	5527	370	319	689	C:370	G:319	0.00273032	2.24e-05	C:0.00000150	G:0.00000129	331343	3376	C:370	G:319	0.00275374	2.81e-05	C:0.00000308	G:0.00000265	0.00812939	679879	yes	yes	yes	yes
XZ1516_II:10948783:G->A_30535	yes.XZ1516_II:10948783:G->A_30535	XZ1516	0.684538	185245	348932		XZ1516_II	II	G	A	467145	6127	45	152	197	C:45	T:152	0.00189138	2.48e-05	C:0.00000018	T:0.00000062	230240	3502	C:45	T:150	0.00191349	2.91e-05	C:0.00000037	T:0.00000125	0.012946	473272	yes	yes	yes	yes
XZ1516_III:13107706:A->C_52533	yes.XZ1516_III:13107706:A->C_52533	XZ1516	0.684538	185245	348932		XZ1516_III	III	A	C	465704	5733	41	31	72	G:41	T:31	0.00188554	2.32e-05	G:0.00000017	T:0.00000013	252289	3490	G:41	T:31	0.00209673	2.9e-05	G:0.00000034	T:0.00000026	0.0121607	471437	yes	yes	yes	yes
XZ1516_IV:535476:T->A_53684	no.XZ1516_IV:535476:T->A_53684	XZ1516	0.684538	185245	348932		XZ1516_IV	IV	T	A	827000	44343	175	505	680	C:175	G:505	0.00334836	0.00017954	C:0.00000071	G:0.00000204	407791	33234	C:175	G:505	0.00338909	0.0002762	C:0.00000145	G:0.00000420	0.0508904	871343	no	yes	yes	no

## Sheet: MIP_Primers
PCR primers, sequencing primers and indices from Hiatt et al., 2013 used for preparation of MIP-seq libraries
Name	Sequence
MIP backbone	CTTCAGCTTCCCGATCCGACGGTAGTGTNNNNNNNNNNNN
Forward PCR primer	AATGATACGGCGACCACCGAGATCTACACATACGAGATCCGTAATCGGGAAGCTGAAG
Reverse PCR primer*	CAAGCAGAAGACGGCATACGAGATXXXXXXXXACACGCACGATCCGACGGTAGTGT
Index 1	CTCTAGCA
Index 2	AGCTCTCA
Index 3	TGAGTGAC
Index 4	ACGCTTAT
Index 5	CAGATAGT
Index 6	GTCACCAT
Index 7	TGGTCGAA
Index 8	GCAATATA
Index 9	CACATGCA
Index 10	TCCTTCGA
Index 11	CTGATGTA
Index 12	CACTGCAA
Index 13	TCGGAGAA
Index 14	CTGAGCTT
Index 15	CTTGGTAC
Index 16	CTGACAAT
Index 17	TGGTACAG
Index 18	GGTCTCAA
Index 19	TGGCTAAT
Index 20	AGAGGATC
Index 21	CGAATACA
Index 22	AGCGTTAC
Index 23	TGACCTCA
Index 24	TAGTTGCC
Index 25	GTTGCAGT
Index 26	ATAGAGGC
Index 27	CTTGACTG
Index 28	AACCTCGA
Index 29	TCAACCGA
Index 30	GCTATGGA
Index 31	TCTTGACC
Index 32	ACATGGAT
Index 33	ATGACAGC
Index 34	AACTCCTG
Index 35	ACTTAAGG
Index 36	TCTTGCAT
Index 37	GACTGTTC
Index 38	ACTGACCT
Index 39	TGTGTCCA
Index 40	CCTGTCAT
Index 41	ATGTACTT
Index 42	GAATAATC
Index 43	CCTTAGAA
Index 44	GAATTCGC
Index 45	CTAGTCCT
Index 46	TCAGAGGT
Index 47	GACATTCT
Index 48	CTAACACG
Index 49	GTGTGATC
Index 50	CTGTTCAC
Index 51	GGTCAGTT
Index 52	AACCGATC
Index 53	CAGCTAAG
Read 1 sequencing primer	CATACGAGATCCGTAATCGGGAAGCTGAAG
Index sequencing primer	ACACTACCGTCGGATCGTGCGTGT
Read 2 sequencing primer	ACACGCACGATCCGACGGTAGTGT

## Sheet: StandardCurve_Counts
mip_name	ref	alt	ref_read_count	alt_read_count	other1_read_count	other2_read_count	ref_read_freq	alt_read_freq	other1_read_freq	other2_read_freq	ref_umi_count	alt_umi_count	other1_umi_count	other2_umi_count	ref_umi_freq	alt_umi_freq	other1_umi_freq	other2_umi_freq	strain	sampleId	dilution	dilution_fold	total_read_count	alt_to_total_read_ratio	total_umi_count	alt_to_total_umi_ratio	series	expected_freq
CB4856_I:9767293:G->A_2812	G	A	819467	986329	C:290	T:136	0.013848	0.016667	C:0.000005	T:0.000002	128469	151150	C:282	T:123	0.015122	0.017792	C:0.000033	T:0.000014	CB4856	2X-1_S1	0	1	1805796	0.546202	279619	0.540557	2X	0.503931
CB4856_II:14311750:T->A_8962	T	A	904468	508082	C:968	G:2392	0.015284	0.008586	C:0.000016	G:0.000040	129412	91541	C:954	G:2364	0.015233	0.010775	C:0.000112	G:0.000278	CB4856	2X-1_S1	0	1	1412550	0.359691	220953	0.414301	2X	0.503931
CB4856_III:1209062:A->G_9612	A	G	435458	500002	C:204	T:273	0.007358	0.008449	C:0.000003	T:0.000005	73055	82518	C:204	T:267	0.008599	0.009713	C:0.000024	T:0.000031	CB4856	2X-1_S1	0	1	935460	0.534499	155573	0.530413	2X	0.503931
CB4856_IV:1607284:A->C_12264	A	C	813519	958923	G:699	T:325	0.013747	0.016204	G:0.000012	T:0.000005	150845	171118	G:692	T:325	0.017756	0.020142	G:0.000081	T:0.000038	CB4856	2X-1_S1	0	1	1772442	0.541018	321963	0.531483	2X	0.503931
CB4856_V:1538750:T->A_16498	T	A	611695	1176702	C:141	G:219	0.010337	0.019884	C:0.000002	G:0.000004	131342	182895	C:136	G:219	0.01546	0.021529	C:0.000016	G:0.000026	CB4856	2X-1_S1	0	1	1788397	0.657965	314237	0.582029	2X	0.503931
CB4856_X:13967551:G->A_23167	G	A	685001	983203	C:461	T:516	0.011575	0.016614	C:0.000008	T:0.000009	112868	156804	C:459	T:514	0.013286	0.018457	C:0.000054	T:0.000061	CB4856	2X-1_S1	0	1	1668204	0.589378	269672	0.581462	2X	0.503931
CB4856_I:9767293:G->A_2812	G	A	1465976	25399	C:50	T:117	0.028069	0.000486	C:0.000001	T:0.000002	258267	6234	C:50	T:107	0.028697	0.000693	C:0.000006	T:0.000012	CB4856	2X-2_S2	5	32	1491375	0.0170306	264501	0.0235689	2X	0.0157428
CB4856_II:14311750:T->A_8962	T	A	1648635	15629	C:984	G:3124	0.031567	0.000299	C:0.000019	G:0.000060	258069	5212	C:963	G:3059	0.028675	0.000579	C:0.000107	G:0.000340	CB4856	2X-2_S2	5	32	1664264	0.00939094	263281	0.0197963	2X	0.0157428
CB4856_III:1209062:A->G_9612	A	G	764220	12771	C:161	T:230	0.014633	0.000245	C:0.000003	T:0.000004	153163	3171	C:161	T:230	0.017019	0.000352	C:0.000018	T:0.000026	CB4856	2X-2_S2	5	32	776991	0.0164365	156334	0.0202835	2X	0.0157428
CB4856_IV:1607284:A->C_12264	A	C	1629992	28081	G:1352	T:486	0.03121	0.000538	G:0.000026	T:0.000009	298828	7885	G:1342	T:486	0.033204	0.000876	G:0.000149	T:0.000054	CB4856	2X-2_S2	5	32	1658073	0.0169359	306713	0.0257081	2X	0.0157428
CB4856_V:1538750:T->A_16498	T	A	356711	28498	C:56	G:73	0.00683	0.000546	C:0.000001	G:0.000001	81650	8724	C:56	G:73	0.009072	0.000969	C:0.000006	G:0.000008	CB4856	2X-2_S2	5	32	385209	0.0739806	90374	0.0965322	2X	0.0157428
CB4856_X:13967551:G->A_23167	G	A	1202367	24268	C:269	T:444	0.023022	0.000465	C:0.000005	T:0.000009	226254	6231	C:268	T:434	0.02514	0.000692	C:0.000030	T:0.000048	CB4856	2X-2_S2	5	32	1226635	0.0197842	232485	0.0268017	2X	0.0157428
CB4856_I:9767293:G->A_2812	G	A	1598482	247840	C:95	T:128	0.024999	0.003876	C:0.000001	T:0.000002	256637	48803	C:95	T:118	0.02528	0.004807	C:0.000009	T:0.000012	CB4856	2X-3_S3	2	4	1846322	0.134234	305440	0.159779	2X	0.125983
CB4856_II:14311750:T->A_8962	T	A	1827284	134820	C:868	G:1680	0.028578	0.002109	C:0.000014	G:0.000026	261349	31599	C:866	G:1668	0.025744	0.003113	C:0.000085	G:0.000164	CB4856	2X-3_S3	2	4	1962104	0.068712	292948	0.107866	2X	0.125983
CB4856_III:1209062:A->G_9612	A	G	836484	120938	C:219	T:245	0.013082	0.001891	C:0.000003	T:0.000004	152901	25147	C:219	T:244	0.015061	0.002477	C:0.000022	T:0.000024	CB4856	2X-3_S3	2	4	957422	0.126316	178048	0.141237	2X	0.125983
CB4856_IV:1607284:A->C_12264	A	C	1651402	253648	G:1278	T:466	0.025827	0.003967	G:0.000020	T:0.000007	294089	59427	G:1269	T:464	0.028969	0.005854	G:0.000125	T:0.000046	CB4856	2X-3_S3	2	4	1905050	0.133145	353516	0.168103	2X	0.125983
CB4856_V:1538750:T->A_16498	T	A	1209719	264138	C:179	G:254	0.018919	0.004131	C:0.000003	G:0.000004	229115	62876	C:173	G:254	0.022569	0.006194	C:0.000017	G:0.000025	CB4856	2X-3_S3	2	4	1473857	0.179215	291991	0.215335	2X	0.125983
CB4856_X:13967551:G->A_23167	G	A	1379908	251314	C:364	T:590	0.021581	0.00393	C:0.000006	T:0.000009	229300	51012	C:357	T:586	0.022587	0.005025	C:0.000035	T:0.000058	CB4856	2X-3_S3	2	4	1631222	0.154065	280312	0.181983	2X	0.125983
CB4856_I:9767293:G->A_2812	G	A	334522	1289078	C:315	T:111	0.006095	0.023487	C:0.000006	T:0.000002	83001	264348	C:312	T:110	0.007714	0.024569	C:0.000029	T:0.000010	CB4856	4X-1_S4	0	1	1623600	0.793963	347349	0.761044	4X	0.750047
CB4856_II:14311750:T->A_8962	T	A	431602	813292	C:1244	G:3909	0.007864	0.014818	C:0.000023	G:0.000071	93757	195379	C:1241	G:3850	0.008714	0.018159	C:0.000115	G:0.000358	CB4856	4X-1_S4	0	1	1244894	0.653302	289136	0.675734	4X	0.750047
CB4856_III:1209062:A->G_9612	A	G	198611	717352	C:181	T:292	0.003619	0.01307	C:0.000003	T:0.000005	49882	161946	C:181	T:288	0.004636	0.015051	C:0.000017	T:0.000027	CB4856	4X-1_S4	0	1	915963	0.783167	211828	0.764516	4X	0.750047
CB4856_IV:1607284:A->C_12264	A	C	377228	1376983	G:466	T:218	0.006873	0.025089	G:0.000008	T:0.000004	105818	303556	G:458	T:207	0.009835	0.028213	G:0.000043	T:0.000019	CB4856	4X-1_S4	0	1	1754211	0.784959	409374	0.741513	4X	0.750047
CB4856_V:1538750:T->A_16498	T	A	190772	1466358	C:105	G:228	0.003476	0.026717	C:0.000002	G:0.000004	91252	314733	C:105	G:220	0.008481	0.029251	C:0.000010	G:0.000020	CB4856	4X-1_S4	0	1	1657130	0.884878	405985	0.775233	4X	0.750047
CB4856_X:13967551:G->A_23167	G	A	287002	1240583	C:482	T:527	0.005229	0.022604	C:0.000009	T:0.000010	73785	265762	C:480	T:525	0.006858	0.0247	C:0.000045	T:0.000049	CB4856	4X-1_S4	0	1	1527585	0.81212	339547	0.782696	4X	0.750047
CB4856_I:9767293:G->A_2812	G	A	1820008	2068	C:53	T:139	0.02921	3.3e-05	C:0.000001	T:0.000002	301634	1306	C:53	T:131	0.029247	0.000127	C:0.000005	T:0.000013	CB4856	4X-2_S5	5	1024	1822076	0.00113497	302940	0.00431109	4X	0.000731296
CB4856_II:14311750:T->A_8962	T	A	1978467	2821	C:1155	G:3268	0.031753	4.5e-05	C:0.000019	G:0.000052	303658	2300	C:1140	G:3202	0.029443	0.000223	C:0.000111	G:0.000310	CB4856	4X-2_S5	5	1024	1981288	0.00142382	305958	0.00751737	4X	0.000731296
CB4856_III:1209062:A->G_9612	A	G	955812	1155	C:194	T:271	0.01534	1.9e-05	C:0.000003	T:0.000004	180357	671	C:194	T:269	0.017488	6.5e-05	C:0.000019	T:0.000026	CB4856	4X-2_S5	5	1024	956967	0.00120694	181028	0.00370661	4X	0.000731296
CB4856_IV:1607284:A->C_12264	A	C	1979131	2856	G:1868	T:714	0.031763	4.6e-05	G:0.000030	T:0.000011	345745	2006	G:1849	T:707	0.033524	0.000195	G:0.000179	T:0.000069	CB4856	4X-2_S5	5	1024	1981987	0.00144098	347751	0.0057685	4X	0.000731296
CB4856_V:1538750:T->A_16498	T	A	110295	2414	C:17	G:22	0.00177	3.9e-05	C:0.000000	G:0.000000	28456	1639	C:17	G:22	0.002759	0.000159	C:0.000002	G:0.000002	CB4856	4X-2_S5	5	1024	112709	0.021418	30095	0.0544609	4X	0.000731296
CB4856_X:13967551:G->A_23167	G	A	1574269	2112	C:344	T:546	0.025266	3.4e-05	C:0.000006	T:0.000009	272827	1306	C:344	T:544	0.026454	0.000127	C:0.000033	T:0.000053	CB4856	4X-2_S5	5	1024	1576381	0.00133978	274133	0.00476411	4X	0.000731296
CB4856_I:9767293:G->A_2812	G	A	1759945	49138	C:72	T:137	0.024892	0.000695	C:0.000001	T:0.000002	401027	17376	C:72	T:133	0.02629	0.001139	C:0.000005	T:0.000009	CB4856	4X-3_S6	2	16	1809083	0.0271618	418403	0.0415293	4X	0.0468779
CB4856_II:14311750:T->A_8962	T	A	2306466	38163	C:890	G:1325	0.032621	0.00054	C:0.000013	G:0.000019	439384	14507	C:889	G:1318	0.028805	0.000951	C:0.000058	G:0.000086	CB4856	4X-3_S6	2	16	2344629	0.0162768	453891	0.0319614	4X	0.0468779
CB4856_III:1209062:A->G_9612	A	G	1131973	29522	C:234	T:352	0.01601	0.000418	C:0.000003	T:0.000005	289729	10172	C:234	T:351	0.018994	0.000667	C:0.000015	T:0.000023	CB4856	4X-3_S6	2	16	1161495	0.0254172	299901	0.0339179	4X	0.0468779
CB4856_IV:1607284:A->C_12264	A	C	2070746	58636	G:2524	T:957	0.029287	0.000829	G:0.000036	T:0.000014	445223	22993	G:2489	T:955	0.029188	0.001507	G:0.000163	T:0.000063	CB4856	4X-3_S6	2	16	2129382	0.0275366	468216	0.0491077	4X	0.0468779
CB4856_V:1538750:T->A_16498	T	A	1981415	74036	C:287	G:353	0.028024	0.001047	C:0.000004	G:0.000005	468395	34995	C:283	G:353	0.030707	0.002294	C:0.000019	G:0.000023	CB4856	4X-3_S6	2	16	2055451	0.0360193	503390	0.0695187	4X	0.0468779
CB4856_X:13967551:G->A_23167	G	A	1591067	46530	C:353	T:576	0.022503	0.000658	C:0.000005	T:0.000008	379361	17279	C:353	T:571	0.02487	0.001133	C:0.000023	T:0.000037	CB4856	4X-3_S6	2	16	1637597	0.0284136	396640	0.0435634	4X	0.0468779
DL200_I:14791278:G->A_0113	G	A	2311514	41432	C:563	T:627	0.039061	0.0007	C:0.000010	T:0.000011	327243	8142	C:560	T:622	0.03852	0.000958	C:0.000066	T:0.000073	DL200	2X-1_S1	5	32	2352946	0.0176086	335385	0.0242766	2X	0.0157428
DL200_II:10684581:C->T_0188	C	T	1431406	23483	A:834	G:276	0.024188	0.000397	A:0.000014	G:0.000005	212555	5046	A:748	G:276	0.02502	0.000594	A:0.000088	G:0.000032	DL200	2X-1_S1	5	32	1454889	0.0161407	217601	0.0231892	2X	0.0157428
DL200_III:7446135:C->G_0300	C	G	211506	98923	A:428	T:183	0.003574	0.001672	A:0.000007	T:0.000003	42507	19742	A:258	T:142	0.005003	0.002324	A:0.000030	T:0.000017	DL200	2X-1_S1	5	32	310429	0.318665	62249	0.317146	2X	0.0157428
DL200_IV:377104:T->C_0370	T	C	1670661	28232	A:463	G:278	0.028231	0.000477	A:0.000008	G:0.000005	239091	6042	A:463	G:278	0.028143	0.000711	A:0.000054	G:0.000033	DL200	2X-1_S1	5	32	1698893	0.0166179	245133	0.0246478	2X	0.0157428
DL200_V:17954136:A->G_0656	A	G	1491370	20764	C:371	T:507	0.025202	0.000351	C:0.000006	T:0.000009	257733	5316	C:369	T:502	0.030338	0.000626	C:0.000043	T:0.000059	DL200	2X-1_S1	5	32	1512134	0.0137316	263049	0.0202092	2X	0.0157428
DL200_X:16129009:C->T_0867	C	T	1141305	18442	A:776	G:494	0.019286	0.000312	A:0.000013	G:0.000008	217074	4993	A:694	G:486	0.025552	0.000588	A:0.000082	G:0.000057	DL200	2X-1_S1	5	32	1159747	0.0159017	222067	0.0224842	2X	0.0157428
DL200_I:14791278:G->A_0113	G	A	1860704	70548	C:501	T:543	0.035627	0.001351	C:0.000010	T:0.000010	339424	16746	C:498	T:525	0.037715	0.001861	C:0.000055	T:0.000058	DL200	2X-2_S2	4	16	1931252	0.0365297	356170	0.0470169	2X	0.0315057
DL200_II:10684581:C->T_0188	C	T	1283416	48972	A:813	G:270	0.024574	0.000938	A:0.000016	G:0.000005	226134	11308	A:729	G:270	0.025127	0.001256	A:0.000081	G:0.000030	DL200	2X-2_S2	4	16	1332388	0.0367551	237442	0.0476243	2X	0.0315057
DL200_III:7446135:C->G_0300	C	G	185929	228287	A:374	T:197	0.00356	0.004371	A:0.000007	T:0.000004	47896	53009	A:271	T:143	0.005322	0.00589	A:0.000030	T:0.000016	DL200	2X-2_S2	4	16	414216	0.55113	100905	0.525336	2X	0.0315057
DL200_IV:377104:T->C_0370	T	C	1454753	55459	A:374	G:252	0.027855	0.001062	A:0.000007	G:0.000005	248385	13294	A:365	G:252	0.027599	0.001477	A:0.000041	G:0.000028	DL200	2X-2_S2	4	16	1510212	0.0367227	261679	0.0508027	2X	0.0315057
DL200_V:17954136:A->G_0656	A	G	1207286	37214	C:320	T:426	0.023116	0.000713	C:0.000006	T:0.000008	268527	11611	C:320	T:426	0.029837	0.00129	C:0.000036	T:0.000047	DL200	2X-2_S2	4	16	1244500	0.0299028	280138	0.0414474	2X	0.0315057
DL200_X:16129009:C->T_0867	C	T	1059724	30507	A:1162	G:2012	0.020291	0.000584	A:0.000022	G:0.000039	237311	10752	A:1116	G:1835	0.026369	0.001195	A:0.000124	G:0.000204	DL200	2X-2_S2	4	16	1090231	0.0279821	248063	0.0433438	2X	0.0315057
DL200_I:14791278:G->A_0113	G	A	1788026	668668	C:729	T:759	0.027964	0.010458	C:0.000011	T:0.000012	301487	129534	C:728	T:742	0.029698	0.01276	C:0.000072	T:0.000073	DL200	2X-3_S3	1	2	2456694	0.272182	431021	0.300528	2X	0.251965
DL200_II:10684581:C->T_0188	C	T	1201597	438541	A:885	G:641	0.018792	0.006859	A:0.000014	G:0.000010	201587	85705	A:821	G:640	0.019857	0.008442	A:0.000081	G:0.000063	DL200	2X-3_S3	1	2	1640138	0.267381	287292	0.29832	2X	0.251965
DL200_III:7446135:C->G_0300	C	G	190066	233196	A:361	T:204	0.002973	0.003647	A:0.000006	T:0.000003	46090	51500	A:287	T:152	0.00454	0.005073	A:0.000028	T:0.000015	DL200	2X-3_S3	1	2	423262	0.55095	97590	0.527718	2X	0.251965
DL200_IV:377104:T->C_0370	T	C	1257980	488561	A:498	G:274	0.019674	0.007641	A:0.000008	G:0.000004	217573	98794	A:452	G:274	0.021432	0.009732	A:0.000045	G:0.000027	DL200	2X-3_S3	1	2	1746541	0.279731	316367	0.312277	2X	0.251965
DL200_V:17954136:A->G_0656	A	G	1043188	372781	C:348	T:484	0.016315	0.00583	C:0.000005	T:0.000008	226481	91911	C:348	T:484	0.022309	0.009054	C:0.000034	T:0.000048	DL200	2X-3_S3	1	2	1415969	0.263269	318392	0.288672	2X	0.251965
DL200_X:16129009:C->T_0867	C	T	868927	267783	A:3120	G:9560	0.01359	0.004188	A:0.000049	G:0.000150	205680	82278	A:3000	G:8857	0.02026	0.008105	A:0.000296	G:0.000872	DL200	2X-3_S3	1	2	1136710	0.235577	287958	0.285729	2X	0.251965
DL200_I:14791278:G->A_0113	G	A	2111958	2353	C:465	T:545	0.03848	4.3e-05	C:0.000008	T:0.000010	413018	1214	C:461	T:539	0.038386	0.000113	C:0.000043	T:0.000050	DL200	4X-1_S4	5	1024	2114311	0.00111289	414232	0.00293072	4X	0.000731296
DL200_II:10684581:C->T_0188	C	T	1525391	1531	A:752	G:239	0.027793	2.8e-05	A:0.000014	G:0.000004	292538	790	A:704	G:238	0.027189	7.3e-05	A:0.000065	G:0.000022	DL200	4X-1_S4	5	1024	1526922	0.00100267	293328	0.00269323	4X	0.000731296
DL200_III:7446135:C->G_0300	C	G	154365	69191	A:433	T:130	0.002813	0.001261	A:0.000008	T:0.000002	44533	19822	A:219	T:91	0.004139	0.001842	A:0.000020	T:0.000008	DL200	4X-1_S4	5	1024	223556	0.309502	64355	0.30801	4X	0.000731296
DL200_IV:377104:T->C_0370	T	C	1510548	1469	A:450	G:303	0.027523	2.7e-05	A:0.000008	G:0.000006	294257	731	A:445	G:303	0.027348	6.8e-05	A:0.000041	G:0.000028	DL200	4X-1_S4	5	1024	1512017	0.00097155	294988	0.00247807	4X	0.000731296
DL200_V:17954136:A->G_0656	A	G	1443411	1319	C:374	T:467	0.026299	2.4e-05	C:0.000007	T:0.000009	337317	846	C:374	T:467	0.03135	7.9e-05	C:0.000035	T:0.000043	DL200	4X-1_S4	5	1024	1444730	0.000912973	338163	0.00250175	4X	0.000731296
DL200_X:16129009:C->T_0867	C	T	1124707	1001	A:618	G:321	0.020492	1.8e-05	A:0.000011	G:0.000006	281115	613	A:582	G:314	0.026127	5.7e-05	A:0.000054	G:0.000029	DL200	4X-1_S4	5	1024	1125708	0.000889218	281728	0.00217586	4X	0.000731296
DL200_I:14791278:G->A_0113	G	A	2604494	8779	C:557	T:644	0.0418	0.000141	C:0.000009	T:0.000010	408116	2801	C:557	T:638	0.039572	0.000272	C:0.000054	T:0.000062	DL200	4X-2_S5	4	256	2613273	0.00335939	410917	0.00681646	4X	0.00292518
DL200_II:10684581:C->T_0188	C	T	1529368	5010	A:940	G:315	0.024545	8e-05	A:0.000015	G:0.000005	265943	1710	A:852	G:315	0.025786	0.000166	A:0.000083	G:0.000031	DL200	4X-2_S5	4	256	1534378	0.00326517	267653	0.00638887	4X	0.00292518
DL200_III:7446135:C->G_0300	C	G	234264	361818	A:566	T:286	0.00376	0.005807	A:0.000009	T:0.000005	59149	81473	A:405	T:243	0.005735	0.0079	A:0.000039	T:0.000024	DL200	4X-2_S5	4	256	596082	0.606994	140622	0.579376	4X	0.00292518
DL200_IV:377104:T->C_0370	T	C	1851505	6708	A:531	G:343	0.029715	0.000108	A:0.000009	G:0.000006	292514	2013	A:529	G:342	0.028363	0.000195	A:0.000051	G:0.000033	DL200	4X-2_S5	4	256	1858213	0.00360992	294527	0.00683469	4X	0.00292518
DL200_V:17954136:A->G_0656	A	G	1430219	4446	C:366	T:513	0.022954	7.1e-05	C:0.000006	T:0.000008	309067	1749	C:365	T:511	0.029968	0.00017	C:0.000035	T:0.000050	DL200	4X-2_S5	4	256	1434665	0.00309898	310816	0.00562712	4X	0.00292518
DL200_X:16129009:C->T_0867	C	T	1096221	2713	A:652	G:392	0.017593	4.4e-05	A:0.000010	G:0.000006	268782	1316	A:605	G:384	0.026062	0.000128	A:0.000059	G:0.000037	DL200	4X-2_S5	4	256	1098934	0.00246876	270098	0.00487231	4X	0.00292518
DL200_I:14791278:G->A_0113	G	A	2266814	308626	C:677	T:669	0.03206	0.004365	C:0.000010	T:0.000009	496716	95995	C:669	T:650	0.032563	0.006293	C:0.000044	T:0.000043	DL200	4X-3_S6	1	4	2575440	0.119834	592711	0.161959	4X	0.187512
DL200_II:10684581:C->T_0188	C	T	1729277	221926	A:1103	G:540	0.024458	0.003139	A:0.000016	G:0.000008	380274	72287	A:1032	G:538	0.02493	0.004739	A:0.000068	G:0.000035	DL200	4X-3_S6	1	4	1951203	0.113738	452561	0.159729	4X	0.187512
DL200_III:7446135:C->G_0300	C	G	69495	80779	A:237	T:95	0.000983	0.001142	A:0.000003	T:0.000001	27563	29216	A:145	T:69	0.001807	0.001915	A:0.000010	T:0.000005	DL200	4X-3_S6	1	4	150274	0.537545	56779	0.514556	4X	0.187512
DL200_IV:377104:T->C_0370	T	C	1678989	237221	A:553	G:335	0.023747	0.003355	A:0.000008	G:0.000005	360260	76344	A:530	G:335	0.023618	0.005005	A:0.000035	G:0.000022	DL200	4X-3_S6	1	4	1916210	0.123797	436604	0.174859	4X	0.187512
DL200_V:17954136:A->G_0656	A	G	1242640	169997	C:347	T:486	0.017575	0.002404	C:0.000005	T:0.000007	365041	68492	C:347	T:485	0.023931	0.00449	C:0.000023	T:0.000032	DL200	4X-3_S6	1	4	1412637	0.12034	433533	0.157986	4X	0.187512
DL200_X:16129009:C->T_0867	C	T	1205907	138400	A:1975	G:4257	0.017056	0.001957	A:0.000028	G:0.000060	337563	60144	A:1926	G:4106	0.02213	0.003943	A:0.000126	G:0.000269	DL200	4X-3_S6	1	4	1344307	0.102953	397707	0.151227	4X	0.187512
ED3077_I:2393375:A->T_0027	A	T	1556324	392920	C:99	G:269	0.026299	0.00664	C:0.000002	G:0.000005	235065	69307	C:98	G:245	0.027669	0.008158	C:0.000012	G:0.000029	ED3077	2X-1_S1	1	2	1949244	0.201576	304372	0.227705	2X	0.251965
ED3077_II:5937487:C->G_0195	C	G	793337	196096	A:739	T:85	0.013406	0.003314	A:0.000012	T:0.000001	142572	38115	A:643	T:78	0.016782	0.004487	A:0.000076	T:0.000009	ED3077	2X-1_S1	1	2	989433	0.19819	180687	0.210945	2X	0.251965
ED3077_III:13011034:A->G_0364	A	G	1917692	460639	C:61	T:47	0.032406	0.007784	C:0.000001	T:0.000001	299214	86756	C:61	T:46	0.03522	0.010212	C:0.000007	T:0.000005	ED3077	2X-1_S1	1	2	2378331	0.193682	385970	0.224774	2X	0.251965
ED3077_IV:16879562:G->A_0482	G	A	2592010	160522	C:1860	T:3397	0.043801	0.002713	C:0.000031	T:0.000057	268446	28671	C:1847	T:3310	0.031599	0.003375	C:0.000217	T:0.000390	ED3077	2X-1_S1	1	2	2752532	0.0583179	297117	0.0964973	2X	0.251965
ED3077_V:18396576:T->A_0666	T	A	608823	467606	C:328	G:345	0.010288	0.007902	C:0.000006	G:0.000006	95865	75077	C:314	G:339	0.011284	0.008837	C:0.000037	G:0.000040	ED3077	2X-1_S1	1	2	1076429	0.434405	170942	0.439196	2X	0.251965
ED3077_X:8913678:T->C_0771	T	C	1253862	299944	A:1039	G:1032	0.021188	0.005069	A:0.000018	G:0.000017	180272	46569	A:1018	G:1028	0.02122	0.005482	A:0.000120	G:0.000121	ED3077	2X-1_S1	1	2	1553806	0.193038	226841	0.205294	2X	0.251965
ED3077_I:2393375:A->T_0027	A	T	899660	837924	C:136	G:247	0.017226	0.016044	C:0.000003	G:0.000005	175038	162925	C:122	G:241	0.019449	0.018103	C:0.000014	G:0.000027	ED3077	2X-2_S2	0	1	1737584	0.482235	337963	0.482079	2X	0.503931
ED3077_II:5937487:C->G_0195	C	G	484361	445385	A:511	T:89	0.009274	0.008528	A:0.000010	T:0.000002	107515	100992	A:450	T:85	0.011946	0.011222	A:0.000050	T:0.000009	ED3077	2X-2_S2	0	1	929746	0.479039	208507	0.484358	2X	0.503931
ED3077_III:13011034:A->G_0364	A	G	590182	1089100	C:36	T:77	0.0113	0.020853	C:0.000001	T:0.000001	123591	212530	C:36	T:66	0.013733	0.023615	C:0.000004	T:0.000007	ED3077	2X-2_S2	0	1	1679282	0.648551	336121	0.632302	2X	0.503931
ED3077_IV:16879562:G->A_0482	G	A	2205999	369351	C:663	T:1114	0.042239	0.007072	C:0.000013	T:0.000021	281196	66129	C:661	T:1067	0.031245	0.007348	C:0.000073	T:0.000119	ED3077	2X-2_S2	0	1	2575350	0.143418	347325	0.190395	2X	0.503931
ED3077_V:18396576:T->A_0666	T	A	1026371	1001595	C:664	G:668	0.019652	0.019178	C:0.000013	G:0.000013	178061	173330	C:626	G:663	0.019785	0.019259	C:0.000070	G:0.000074	ED3077	2X-2_S2	0	1	2027966	0.493891	351391	0.493268	2X	0.503931
ED3077_X:8913678:T->C_0771	T	C	850420	755319	A:922	G:787	0.016283	0.014462	A:0.000018	G:0.000015	139076	120936	A:849	G:786	0.015453	0.013438	A:0.000094	G:0.000087	ED3077	2X-2_S2	0	1	1605739	0.470387	260012	0.465117	2X	0.503931
ED3077_I:2393375:A->T_0027	A	T	1986161	13872	C:69	G:263	0.031062	0.000217	C:0.000001	G:0.000004	316831	3340	C:69	G:221	0.031209	0.000329	C:0.000007	G:0.000022	ED3077	2X-3_S3	6	64	2000033	0.00693589	320171	0.0104319	2X	0.00788148
ED3077_II:5937487:C->G_0195	C	G	1089160	7910	A:940	T:88	0.017034	0.000124	A:0.000015	T:0.000001	211705	1977	A:884	T:82	0.020854	0.000195	A:0.000087	T:0.000008	ED3077	2X-3_S3	6	64	1097070	0.00721011	213682	0.00925207	2X	0.00788148
ED3077_III:13011034:A->G_0364	A	G	2462835	17174	C:43	T:38	0.038517	0.000269	C:0.000001	T:0.000001	401985	4442	C:43	T:38	0.039597	0.000438	C:0.000004	T:0.000004	ED3077	2X-3_S3	6	64	2480009	0.00692497	406427	0.0109294	2X	0.00788148
ED3077_IV:16879562:G->A_0482	G	A	2843087	11765	C:1734	T:3184	0.044464	0.000184	C:0.000027	T:0.000050	318554	6674	C:1720	T:3132	0.031379	0.000657	C:0.000169	T:0.000309	ED3077	2X-3_S3	6	64	2854852	0.00412105	325228	0.020521	2X	0.00788148
ED3077_V:18396576:T->A_0666	T	A	2071446	17699	C:719	G:540	0.032396	0.000277	C:0.000011	G:0.000008	287016	4376	C:642	G:535	0.028272	0.000431	C:0.000063	G:0.000053	ED3077	2X-3_S3	6	64	2089145	0.00847189	291392	0.0150176	2X	0.00788148
ED3077_X:8913678:T->C_0771	T	C	1785256	12577	A:1235	G:1391	0.02792	0.000197	A:0.000019	G:0.000022	257177	2908	A:1228	G:1386	0.025333	0.000286	A:0.000121	G:0.000137	ED3077	2X-3_S3	6	64	1797833	0.00699564	260085	0.011181	2X	0.00788148
ED3077_I:2393375:A->T_0027	A	T	1485893	283122	C:69	G:246	0.027073	0.005159	C:0.000001	G:0.000004	309440	74518	C:66	G:224	0.028759	0.006926	C:0.000006	G:0.000021	ED3077	4X-1_S4	1	4	1769015	0.160045	383958	0.194079	4X	0.187512
ED3077_II:5937487:C->G_0195	C	G	864634	163466	A:757	T:95	0.015754	0.002978	A:0.000014	T:0.000002	213979	46423	A:687	T:90	0.019887	0.004315	A:0.000064	T:0.000008	ED3077	4X-1_S4	1	4	1028100	0.158998	260402	0.178274	4X	0.187512
ED3077_III:13011034:A->G_0364	A	G	1977996	366126	C:53	T:40	0.03604	0.006671	C:0.000001	T:0.000001	396396	95046	C:53	T:37	0.036841	0.008834	C:0.000005	T:0.000003	ED3077	4X-1_S4	1	4	2344122	0.156189	491442	0.193402	4X	0.187512
ED3077_IV:16879562:G->A_0482	G	A	2781993	136805	C:2898	T:5108	0.050689	0.002493	C:0.000053	T:0.000093	370112	35782	C:2861	T:5004	0.034398	0.003326	C:0.000266	T:0.000465	ED3077	4X-1_S4	1	4	2918798	0.0468703	405894	0.088156	4X	0.187512
ED3077_V:18396576:T->A_0666	T	A	111833	340132	C:155	G:138	0.002038	0.006197	C:0.000003	G:0.000003	29729	81291	C:151	G:138	0.002763	0.007555	C:0.000014	G:0.000013	ED3077	4X-1_S4	1	4	451965	0.752563	111020	0.732219	4X	0.187512
ED3077_X:8913678:T->C_0771	T	C	1332858	251980	A:1113	G:1129	0.024285	0.004591	A:0.000020	G:0.000021	256588	55218	A:1104	G:1123	0.023847	0.005132	A:0.000103	G:0.000104	ED3077	4X-1_S4	1	4	1584838	0.158994	311806	0.177091	4X	0.187512
ED3077_I:2393375:A->T_0027	A	T	614019	1521992	C:173	G:338	0.009854	0.024427	C:0.000003	G:0.000005	124763	261625	C:171	G:318	0.012097	0.025368	C:0.000017	G:0.000031	ED3077	4X-2_S5	0	1	2136011	0.712539	386388	0.677104	4X	0.750047
ED3077_II:5937487:C->G_0195	C	G	356735	870772	A:605	T:146	0.005725	0.013975	A:0.000010	T:0.000002	78083	177140	A:562	T:138	0.007571	0.017176	A:0.000054	T:0.000013	ED3077	4X-2_S5	0	1	1227507	0.709383	255223	0.69406	4X	0.750047
ED3077_III:13011034:A->G_0364	A	G	140930	1816485	C:39	T:74	0.002262	0.029153	C:0.000001	T:0.000001	34161	333936	C:39	T:66	0.003312	0.032379	C:0.000004	T:0.000006	ED3077	4X-2_S5	0	1	1957415	0.928002	368097	0.907196	4X	0.750047
ED3077_IV:16879562:G->A_0482	G	A	2442105	614900	C:829	T:1413	0.039194	0.009869	C:0.000013	T:0.000023	305554	105155	C:824	T:1385	0.029627	0.010196	C:0.000080	T:0.000134	ED3077	4X-2_S5	0	1	3057005	0.201145	410709	0.256033	4X	0.750047
ED3077_V:18396576:T->A_0666	T	A	746598	1841549	C:783	G:823	0.011982	0.029555	C:0.000013	G:0.000013	132561	268295	C:758	G:810	0.012853	0.026014	C:0.000073	G:0.000079	ED3077	4X-2_S5	0	1	2588147	0.711532	400856	0.669305	4X	0.750047
ED3077_X:8913678:T->C_0771	T	C	511296	1185579	A:935	G:665	0.008206	0.019028	A:0.000015	G:0.000011	95059	194524	A:840	G:656	0.009217	0.018861	A:0.000081	G:0.000064	ED3077	4X-2_S5	0	1	1696875	0.698684	289583	0.671738	4X	0.750047
ED3077_I:2393375:A->T_0027	A	T	2302464	789	C:78	G:304	0.032565	1.1e-05	C:0.000001	G:0.000004	487457	558	C:78	G:286	0.031956	3.7e-05	C:0.000005	G:0.000019	ED3077	4X-3_S6	6	4096	2303253	0.000342559	488015	0.00114341	4X	0.000187512
ED3077_II:5937487:C->G_0195	C	G	1373176	530	A:1049	T:125	0.019421	7e-06	A:0.000015	T:0.000002	358189	394	A:993	T:112	0.023482	2.6e-05	A:0.000065	T:0.000007	ED3077	4X-3_S6	6	4096	1373706	0.000385818	358583	0.00109877	4X	0.000187512
ED3077_III:13011034:A->G_0364	A	G	2759720	1117	C:32	T:43	0.039032	1.6e-05	C:0.000000	T:0.000001	574209	872	C:32	T:43	0.037644	5.7e-05	C:0.000002	T:0.000003	ED3077	4X-3_S6	6	4096	2760837	0.000404587	575081	0.00151631	4X	0.000187512
ED3077_IV:16879562:G->A_0482	G	A	2455414	5947	C:1665	T:3162	0.034728	8.4e-05	C:0.000024	T:0.000045	399078	5700	C:1655	T:3117	0.026162	0.000374	C:0.000108	T:0.000204	ED3077	4X-3_S6	6	4096	2461361	0.00241614	404778	0.0140818	4X	0.000187512
ED3077_V:18396576:T->A_0666	T	A	2488885	1535	C:767	G:682	0.035201	2.2e-05	C:0.000011	G:0.000010	435385	1264	C:717	G:678	0.028543	8.3e-05	C:0.000047	G:0.000044	ED3077	4X-3_S6	6	4096	2490420	0.000616362	436649	0.00289477	4X	0.000187512
ED3077_X:8913678:T->C_0771	T	C	2074484	1306	A:1127	G:1243	0.02934	1.8e-05	A:0.000016	G:0.000018	427547	1046	A:1122	G:1240	0.028029	6.9e-05	A:0.000074	G:0.000081	ED3077	4X-3_S6	6	4096	2075790	0.000629158	428593	0.00244054	4X	0.000187512
JU1652_I:8786203:C->G_0049	C	G	319300	43645	A:143	T:141	0.005396	0.000738	A:0.000002	T:0.000002	61131	9478	A:124	T:140	0.007196	0.001116	A:0.000015	T:0.000016	JU1652	2X-1_S1	2	4	362945	0.120252	70609	0.134232	2X	0.125983
JU1652_II:12042169:A->C_1034	A	C	199988	230376	G:45	T:24	0.003379	0.003893	G:0.000001	T:0.000000	36327	40610	G:45	T:24	0.004276	0.00478	G:0.000005	T:0.000003	JU1652	2X-1_S1	2	4	430364	0.535305	76937	0.527834	2X	0.125983
JU1652_III:12677731:C->T,G_1197	C	T	1078692	212091	A:790	G:151	0.018228	0.003584	A:0.000013	G:0.000003	152681	36226	A:732	G:151	0.017972	0.004264	A:0.000086	G:0.000018	JU1652	2X-1_S1	2	4	1290783	0.164312	188907	0.191766	2X	0.125983
JU1652_IV:13210351:G->C_1309	G	C	1203021	236894	A:708	T:560	0.020329	0.004003	A:0.000012	T:0.000009	184329	40227	A:592	T:546	0.021697	0.004735	A:0.000070	T:0.000064	JU1652	2X-1_S1	2	4	1439915	0.164519	224556	0.17914	2X	0.125983
JU1652_V:10767051:G->A_1404	G	A	2064594	376052	C:601	T:1022	0.034888	0.006355	C:0.000010	T:0.000017	268384	58562	C:594	T:976	0.031591	0.006893	C:0.000070	T:0.000115	JU1652	2X-1_S1	2	4	2440646	0.154079	326946	0.179118	2X	0.125983
JU1652_X:3988759:C->A_1502	C	A	3268297	591327	G:822	T:1344	0.055229	0.009992	G:0.000014	T:0.000023	362293	86183	G:814	T:1322	0.042645	0.010145	G:0.000096	T:0.000156	JU1652	2X-1_S1	2	4	3859624	0.153208	448476	0.192169	2X	0.125983
JU1652_I:8786203:C->G_0049	C	G	370296	2226	A:144	T:101	0.00709	4.3e-05	A:0.000003	T:0.000002	84019	728	A:118	T:101	0.009336	8.1e-05	A:0.000013	T:0.000011	JU1652	2X-2_S2	6	64	372522	0.00597549	84747	0.00859027	2X	0.00788148
JU1652_II:12042169:A->C_1034	A	C	387526	14047	G:59	T:22	0.00742	0.000269	G:0.000001	T:0.000000	78683	3043	G:59	T:22	0.008743	0.000338	G:0.000007	T:0.000002	JU1652	2X-2_S2	6	64	401573	0.0349799	81726	0.0372342	2X	0.00788148
JU1652_III:12677731:C->T,G_1197	C	T	1079493	11257	A:605	G:89	0.020669	0.000216	A:0.000012	G:0.000002	185382	2640	A:560	G:89	0.020599	0.000293	A:0.000062	G:0.000010	JU1652	2X-2_S2	6	64	1090750	0.0103204	188022	0.0140409	2X	0.00788148
JU1652_IV:13210351:G->C_1309	G	C	1220946	13038	A:526	T:433	0.023378	0.00025	A:0.000010	T:0.000008	229235	3053	A:452	T:433	0.025471	0.000339	A:0.000050	T:0.000048	JU1652	2X-2_S2	6	64	1233984	0.0105658	232288	0.0131432	2X	0.00788148
JU1652_V:10767051:G->A_1404	G	A	2076399	25065	C:387	T:690	0.039757	0.00048	C:0.000007	T:0.000013	315287	5122	C:381	T:658	0.035033	0.000569	C:0.000042	T:0.000073	JU1652	2X-2_S2	6	64	2101464	0.0119274	320409	0.0159858	2X	0.00788148
JU1652_X:3988759:C->A_1502	C	A	3622077	37806	G:680	T:1262	0.069353	0.000724	G:0.000013	T:0.000024	432234	8084	G:679	T:1250	0.048027	0.000898	G:0.000075	T:0.000139	JU1652	2X-2_S2	6	64	3659883	0.0103298	440318	0.0183595	2X	0.00788148
JU1652_I:8786203:C->G_0049	C	G	445762	12983	A:167	T:158	0.006971	0.000203	A:0.000003	T:0.000002	97615	3508	A:142	T:157	0.009616	0.000346	A:0.000014	T:0.000015	JU1652	2X-3_S3	4	16	458745	0.0283011	101123	0.0346904	2X	0.0315057
JU1652_II:12042169:A->C_1034	A	C	1491909	58463	G:201	T:58	0.023333	0.000914	G:0.000003	T:0.000001	258751	12324	G:201	T:58	0.025488	0.001214	G:0.000020	T:0.000006	JU1652	2X-3_S3	4	16	1550372	0.037709	271075	0.0454634	2X	0.0315057
JU1652_III:12677731:C->T,G_1197	C	T	1195027	51827	A:751	G:102	0.01869	0.000811	A:0.000012	G:0.000002	189093	10899	A:702	G:102	0.018627	0.001074	A:0.000069	G:0.000010	JU1652	2X-3_S3	4	16	1246854	0.0415662	199992	0.0544972	2X	0.0315057
JU1652_IV:13210351:G->C_1309	G	C	1415321	59088	A:644	T:529	0.022135	0.000924	A:0.000010	T:0.000008	242930	12178	A:614	T:527	0.02393	0.0012	A:0.000060	T:0.000052	JU1652	2X-3_S3	4	16	1474409	0.0400757	255108	0.0477366	2X	0.0315057
JU1652_V:10767051:G->A_1404	G	A	2363802	94637	C:464	T:855	0.036969	0.00148	C:0.000007	T:0.000013	333779	18057	C:462	T:850	0.032879	0.001779	C:0.000046	T:0.000084	JU1652	2X-3_S3	4	16	2458439	0.0384948	351836	0.0513222	2X	0.0315057
JU1652_X:3988759:C->A_1502	C	A	3984415	151932	G:802	T:1406	0.062314	0.002376	G:0.000013	T:0.000022	447979	27289	G:799	T:1383	0.044128	0.002688	G:0.000079	T:0.000136	JU1652	2X-3_S3	4	16	4136347	0.036731	475268	0.0574181	2X	0.0315057
JU1652_I:8786203:C->G_0049	C	G	429633	16324	A:184	T:166	0.007828	0.000297	A:0.000003	T:0.000003	114584	5495	A:163	T:154	0.010649	0.000511	A:0.000015	T:0.000014	JU1652	4X-1_S4	2	16	445957	0.0366044	120079	0.0457615	4X	0.0468779
JU1652_II:12042169:A->C_1034	A	C	13653	68203	G:5	T:6	0.000249	0.001243	G:0.000000	T:0.000000	4288	18307	G:5	T:6	0.000399	0.001701	G:0.000000	T:0.000001	JU1652	4X-1_S4	2	16	81856	0.833207	22595	0.810224	4X	0.0468779
JU1652_III:12677731:C->T,G_1197	C	T	1227181	66095	A:801	G:101	0.02236	0.001204	A:0.000015	G:0.000002	228217	16954	A:748	G:101	0.021211	0.001576	A:0.000070	G:0.000009	JU1652	4X-1_S4	2	16	1293276	0.0511066	245171	0.0691517	4X	0.0468779
JU1652_IV:13210351:G->C_1309	G	C	1280175	71423	A:616	T:475	0.023325	0.001301	A:0.000011	T:0.000009	269126	18510	A:566	T:474	0.025013	0.00172	A:0.000053	T:0.000044	JU1652	4X-1_S4	2	16	1351598	0.0528434	287636	0.0643522	4X	0.0468779
JU1652_V:10767051:G->A_1404	G	A	2150388	115885	C:461	T:835	0.039181	0.002111	C:0.000008	T:0.000015	365427	26749	C:446	T:812	0.033963	0.002486	C:0.000041	T:0.000075	JU1652	4X-1_S4	2	16	2266273	0.0511346	392176	0.0682066	4X	0.0468779
JU1652_X:3988759:C->A_1502	C	A	3299302	170297	G:637	T:1186	0.060114	0.003103	G:0.000012	T:0.000022	474435	39235	G:635	T:1179	0.044094	0.003647	G:0.000059	T:0.000110	JU1652	4X-1_S4	2	16	3469599	0.0490826	513670	0.0763817	4X	0.0468779
JU1652_I:8786203:C->G_0049	C	G	423143	203	A:149	T:140	0.006791	3e-06	A:0.000002	T:0.000002	100085	102	A:119	T:139	0.009704	1e-05	A:0.000012	T:0.000013	JU1652	4X-2_S5	6	4096	423346	0.000479513	100187	0.0010181	4X	0.000187512
JU1652_II:12042169:A->C_1034	A	C	99482	511	G:15	T:1	0.001597	8e-06	G:0.000000	T:0.000000	22612	171	G:15	T:1	0.002192	1.7e-05	G:0.000001	T:0.000000	JU1652	4X-2_S5	6	4096	99993	0.00511036	22783	0.0075056	4X	0.000187512
JU1652_III:12677731:C->T,G_1197	C	T	1363924	433	A:777	G:83	0.02189	7e-06	A:0.000012	G:0.000001	224098	270	A:736	G:83	0.021729	2.6e-05	A:0.000071	G:0.000008	JU1652	4X-2_S5	6	4096	1364357	0.000317366	224368	0.00120338	4X	0.000187512
JU1652_IV:13210351:G->C_1309	G	C	1528545	754	A:677	T:558	0.024532	1.2e-05	A:0.000011	T:0.000009	268473	467	A:589	T:550	0.026032	4.5e-05	A:0.000057	T:0.000053	JU1652	4X-2_S5	6	4096	1529299	0.000493036	268940	0.00173645	4X	0.000187512
JU1652_V:10767051:G->A_1404	G	A	2432068	4599	C:422	T:795	0.039033	7.4e-05	C:0.000007	T:0.000013	360408	1432	C:414	T:768	0.034946	0.000139	C:0.000040	T:0.000074	JU1652	4X-2_S5	6	4096	2436667	0.00188741	361840	0.00395755	4X	0.000187512
JU1652_X:3988759:C->A_1502	C	A	4099606	3933	G:778	T:1386	0.065795	6.3e-05	G:0.000012	T:0.000022	479027	2407	G:774	T:1371	0.046447	0.000233	G:0.000075	T:0.000133	JU1652	4X-2_S5	6	4096	4103539	0.000958441	481434	0.00499965	4X	0.000187512
JU1652_I:8786203:C->G_0049	C	G	650562	910	A:239	T:196	0.009201	1.3e-05	A:0.000003	T:0.000003	197848	409	A:188	T:196	0.01297	2.7e-05	A:0.000012	T:0.000013	JU1652	4X-3_S6	4	256	651472	0.00139684	198257	0.00206298	4X	0.00292518
JU1652_II:12042169:A->C_1034	A	C	1853098	2956	G:266	T:66	0.026209	4.2e-05	G:0.000004	T:0.000001	432604	1191	G:266	T:66	0.02836	7.8e-05	G:0.000017	T:0.000004	JU1652	4X-3_S6	4	256	1856054	0.00159263	433795	0.00274554	4X	0.00292518
JU1652_III:12677731:C->T,G_1197	C	T	1288921	2501	A:804	G:96	0.01823	3.5e-05	A:0.000011	G:0.000001	295401	1011	A:777	G:96	0.019366	6.6e-05	A:0.000051	G:0.000006	JU1652	4X-3_S6	4	256	1291422	0.00193662	296412	0.00341079	4X	0.00292518
JU1652_IV:13210351:G->C_1309	G	C	1660644	3430	A:722	T:611	0.023487	4.9e-05	A:0.000010	T:0.000009	388785	1406	A:674	T:604	0.025488	9.2e-05	A:0.000044	T:0.000040	JU1652	4X-3_S6	4	256	1664074	0.00206121	390191	0.00360336	4X	0.00292518
JU1652_V:10767051:G->A_1404	G	A	2658157	7443	C:468	T:907	0.037595	0.000105	C:0.000007	T:0.000013	503880	2884	C:465	T:880	0.033033	0.000189	C:0.000030	T:0.000058	JU1652	4X-3_S6	4	256	2665600	0.00279224	506764	0.00569101	4X	0.00292518
JU1652_X:3988759:C->A_1502	C	A	3772111	8711	G:720	T:1367	0.053351	0.000123	G:0.000010	T:0.000019	599496	4120	G:720	T:1340	0.039301	0.00027	G:0.000047	T:0.000088	JU1652	4X-3_S6	4	256	3780822	0.002304	603616	0.00682553	4X	0.00292518
JU258_I:3628582:A->G_0312	A	G	1894482	10898	C:436	T:173	0.032014	0.000184	C:0.000007	T:0.000003	229950	2066	C:434	T:161	0.027067	0.000243	C:0.000051	T:0.000019	JU258	2X-1_S1	6	64	1905380	0.00571959	232016	0.00890456	2X	0.00788148
JU258_II:983671:T->G_1055	T	G	1362616	10565	A:344	C:392	0.023026	0.000179	A:0.000006	C:0.000007	216633	2327	A:334	C:392	0.0255	0.000274	A:0.000039	C:0.000046	JU258	2X-1_S1	6	64	1373181	0.00769381	218960	0.0106275	2X	0.00788148
JU258_III:6551312:T->G_1613	T	G	1704159	12800	A:228	C:356	0.028797	0.000216	A:0.000004	C:0.000006	220495	2229	A:212	C:344	0.025954	0.000262	A:0.000025	C:0.000040	JU258	2X-1_S1	6	64	1716959	0.00745504	222724	0.0100079	2X	0.00788148
JU258_IV:652672:G->A_1698	G	A	2340123	17318	C:226	T:349	0.039544	0.000293	C:0.000004	T:0.000006	343530	3891	C:221	T:310	0.040437	0.000458	C:0.000026	T:0.000036	JU258	2X-1_S1	6	64	2357441	0.0073461	347421	0.0111997	2X	0.00788148
JU258_V:17066639:C->G_2584	C	G	1128555	8289	A:397	T:469	0.019071	0.00014	A:0.000007	T:0.000008	157934	1718	A:396	T:440	0.01859	0.000202	A:0.000047	T:0.000052	JU258	2X-1_S1	6	64	1136844	0.00729124	159652	0.0107609	2X	0.00788148
JU258_X:4359787:C->T_3220	C	T	523066	6832	A:368	G:66	0.008839	0.000115	A:0.000006	G:0.000001	85632	1309	A:313	G:65	0.01008	0.000154	A:0.000037	G:0.000008	JU258	2X-1_S1	6	64	529898	0.012893	86941	0.0150562	2X	0.00788148
JU258_I:3628582:A->G_0312	A	G	1095931	307642	C:242	T:145	0.020984	0.005891	C:0.000005	T:0.000003	190050	60742	C:240	T:136	0.021117	0.006749	C:0.000027	T:0.000015	JU258	2X-2_S2	1	2	1403573	0.219185	250792	0.242201	2X	0.251965
JU258_II:983671:T->G_1055	T	G	816770	322449	A:265	C:280	0.015639	0.006174	A:0.000005	C:0.000005	164855	70344	A:254	C:269	0.018318	0.007816	A:0.000028	C:0.000030	JU258	2X-2_S2	1	2	1139219	0.283044	235199	0.299083	2X	0.251965
JU258_III:6551312:T->G_1613	T	G	1035152	371640	A:212	C:276	0.01982	0.007116	A:0.000004	C:0.000005	183265	73357	A:191	C:272	0.020363	0.008151	A:0.000021	C:0.000030	JU258	2X-2_S2	1	2	1406792	0.264176	256622	0.285856	2X	0.251965
JU258_IV:652672:G->A_1698	G	A	1443799	518777	C:240	T:311	0.027645	0.009933	C:0.000005	T:0.000006	284227	114598	C:240	T:287	0.031582	0.012733	C:0.000027	T:0.000032	JU258	2X-2_S2	1	2	1962576	0.264335	398825	0.287339	2X	0.251965
JU258_V:17066639:C->G_2584	C	G	710361	254931	A:297	T:398	0.013601	0.004881	A:0.000006	T:0.000008	129948	51994	A:295	T:360	0.014439	0.005777	A:0.000033	T:0.000040	JU258	2X-2_S2	1	2	965292	0.264097	181942	0.285772	2X	0.251965
JU258_X:4359787:C->T_3220	C	T	504513	209804	A:434	G:258	0.00966	0.004017	A:0.000008	G:0.000005	102664	45652	A:377	G:257	0.011407	0.005073	A:0.000042	G:0.000029	JU258	2X-2_S2	1	2	714317	0.293713	148316	0.307802	2X	0.251965
JU258_I:3628582:A->G_0312	A	G	1742495	22240	C:374	T:199	0.027252	0.000348	C:0.000006	T:0.000003	262351	4713	C:374	T:190	0.025843	0.000464	C:0.000037	T:0.000019	JU258	2X-3_S3	5	32	1764735	0.0126025	267064	0.0176475	2X	0.0157428
JU258_II:983671:T->G_1055	T	G	1364509	22839	A:344	C:348	0.02134	0.000357	A:0.000005	C:0.000005	243999	5203	A:338	C:347	0.024035	0.000513	A:0.000033	C:0.000034	JU258	2X-3_S3	5	32	1387348	0.0164623	249202	0.0208786	2X	0.0157428
JU258_III:6551312:T->G_1613	T	G	1769328	28667	A:199	C:386	0.027671	0.000448	A:0.000003	C:0.000006	254806	5635	A:198	C:379	0.0251	0.000555	A:0.000020	C:0.000037	JU258	2X-3_S3	5	32	1797995	0.0159439	260441	0.0216364	2X	0.0157428
JU258_IV:652672:G->A_1698	G	A	2326948	37002	C:229	T:303	0.036392	0.000579	C:0.000004	T:0.000005	385613	8656	C:226	T:280	0.037985	0.000853	C:0.000022	T:0.000028	JU258	2X-3_S3	5	32	2363950	0.0156526	394269	0.0219546	2X	0.0157428
JU258_V:17066639:C->G_2584	C	G	1183670	18917	A:434	T:450	0.018512	0.000296	A:0.000007	T:0.000007	185889	3864	A:432	T:431	0.018311	0.000381	A:0.000043	T:0.000042	JU258	2X-3_S3	5	32	1202587	0.0157303	189753	0.0203633	2X	0.0157428
JU258_X:4359787:C->T_3220	C	T	783004	15162	A:501	G:106	0.012246	0.000237	A:0.000008	G:0.000002	143823	3429	A:486	G:104	0.014167	0.000338	A:0.000048	G:0.000010	JU258	2X-3_S3	5	32	798166	0.018996	147252	0.0232866	2X	0.0157428
JU258_I:3628582:A->G_0312	A	G	1686269	634	C:331	T:132	0.030724	1.2e-05	C:0.000006	T:0.000002	300800	494	C:331	T:127	0.027956	4.6e-05	C:0.000031	T:0.000012	JU258	4X-1_S4	6	4096	1686903	0.000375837	301294	0.00163959	4X	0.000187512
JU258_II:983671:T->G_1055	T	G	1305163	536	A:314	C:336	0.02378	1e-05	A:0.000006	C:0.000006	288241	437	A:314	C:322	0.026789	4.1e-05	A:0.000029	C:0.000030	JU258	4X-1_S4	6	4096	1305699	0.000410508	288678	0.0015138	4X	0.000187512
JU258_III:6551312:T->G_1613	T	G	1684729	369	A:226	C:332	0.030696	7e-06	A:0.000004	C:0.000006	299393	225	A:226	C:321	0.027826	2.1e-05	A:0.000021	C:0.000030	JU258	4X-1_S4	6	4096	1685098	0.000218978	299618	0.000750956	4X	0.000187512
JU258_IV:652672:G->A_1698	G	A	2062232	1074	C:174	T:289	0.037574	2e-05	C:0.000003	T:0.000005	420712	868	C:174	T:260	0.039101	8.1e-05	C:0.000016	T:0.000024	JU258	4X-1_S4	6	4096	2063306	0.000520524	421580	0.00205892	4X	0.000187512
JU258_V:17066639:C->G_2584	C	G	1159849	464	A:374	T:493	0.021133	8e-06	A:0.000007	T:0.000009	222871	354	A:367	T:460	0.020714	3.3e-05	A:0.000034	T:0.000043	JU258	4X-1_S4	6	4096	1160313	0.000399892	223225	0.00158584	4X	0.000187512
JU258_X:4359787:C->T_3220	C	T	456387	313	A:267	G:50	0.008315	6e-06	A:0.000005	G:0.000001	110490	236	A:258	G:50	0.010269	2.2e-05	A:0.000024	G:0.000005	JU258	4X-1_S4	6	4096	456700	0.000685351	110726	0.00213139	4X	0.000187512
JU258_I:3628582:A->G_0312	A	G	1438770	351165	C:286	T:155	0.023091	0.005636	C:0.000005	T:0.000002	232906	67483	C:286	T:151	0.022583	0.006543	C:0.000028	T:0.000015	JU258	4X-2_S5	1	4	1789935	0.196189	300389	0.224652	4X	0.187512
JU258_II:983671:T->G_1055	T	G	976318	341240	A:308	C:310	0.015669	0.005477	A:0.000005	C:0.000005	195769	75692	A:301	C:309	0.018982	0.007339	A:0.000029	C:0.000030	JU258	4X-2_S5	1	4	1317558	0.258994	271461	0.278832	4X	0.187512
JU258_III:6551312:T->G_1613	T	G	1321519	426888	A:298	C:356	0.021209	0.006851	A:0.000005	C:0.000006	224450	81773	A:260	C:351	0.021763	0.007929	A:0.000025	C:0.000034	JU258	4X-2_S5	1	4	1748407	0.244158	306223	0.267037	4X	0.187512
JU258_IV:652672:G->A_1698	G	A	1804104	563082	C:327	T:405	0.028954	0.009037	C:0.000005	T:0.000006	333160	120560	C:325	T:390	0.032304	0.01169	C:0.000032	T:0.000038	JU258	4X-2_S5	1	4	2367186	0.23787	453720	0.265715	4X	0.187512
JU258_V:17066639:C->G_2584	C	G	884336	273863	A:387	T:490	0.014193	0.004395	A:0.000006	T:0.000008	162229	57604	A:383	T:470	0.01573	0.005585	A:0.000037	T:0.000046	JU258	4X-2_S5	1	4	1158199	0.236456	219833	0.262035	4X	0.187512
JU258_X:4359787:C->T_3220	C	T	678427	241683	A:548	G:300	0.010888	0.003879	A:0.000009	G:0.000005	134562	52029	A:508	G:300	0.013047	0.005045	A:0.000049	G:0.000029	JU258	4X-2_S5	1	4	920110	0.262668	186591	0.27884	4X	0.187512
JU258_I:3628582:A->G_0312	A	G	2094098	1171	C:276	T:138	0.029618	1.7e-05	C:0.000004	T:0.000002	416697	664	C:275	T:138	0.027318	4.4e-05	C:0.000018	T:0.000009	JU258	4X-3_S6	5	1024	2095269	0.000558878	417361	0.00159095	4X	0.000731296
JU258_II:983671:T->G_1055	T	G	1154719	932	A:310	C:301	0.016332	1.3e-05	A:0.000004	C:0.000004	348293	606	A:299	C:299	0.022833	4e-05	A:0.000020	C:0.000020	JU258	4X-3_S6	5	1024	1155651	0.000806472	348899	0.00173689	4X	0.000731296
JU258_III:6551312:T->G_1613	T	G	2355032	1307	A:296	C:559	0.033308	1.8e-05	A:0.000004	C:0.000008	430604	556	A:293	C:533	0.028229	3.6e-05	A:0.000019	C:0.000035	JU258	4X-3_S6	5	1024	2356339	0.000554674	431160	0.00128954	4X	0.000731296
JU258_IV:652672:G->A_1698	G	A	2373761	1993	C:231	T:338	0.033573	2.8e-05	C:0.000003	T:0.000005	535656	1351	C:231	T:328	0.035116	8.9e-05	C:0.000015	T:0.000022	JU258	4X-3_S6	5	1024	2375754	0.000838892	537007	0.0025158	4X	0.000731296
JU258_V:17066639:C->G_2584	C	G	1549938	1064	A:563	T:628	0.021921	1.5e-05	A:0.000008	T:0.000009	339574	623	A:551	T:602	0.022262	4.1e-05	A:0.000036	T:0.000039	JU258	4X-3_S6	5	1024	1551002	0.000686008	340197	0.00183129	4X	0.000731296
JU258_X:4359787:C->T_3220	C	T	1184593	1071	A:736	G:129	0.016754	1.5e-05	A:0.000010	G:0.000002	306116	614	A:679	G:129	0.020068	4e-05	A:0.000045	G:0.000008	JU258	4X-3_S6	5	1024	1185664	0.000903291	306730	0.00200176	4X	0.000731296
JU561_I:8259121:C->T_0045	C	T	1328326	42201	A:74	G:40	0.022446	0.000713	A:0.000001	G:0.000001	253234	9988	A:68	G:40	0.029808	0.001176	A:0.000008	G:0.000005	JU561	2X-1_S1	4	16	1370527	0.0307918	263222	0.0379452	2X	0.0315057
JU561_II:8928298:G->T_0168	G	T	1708468	52940	A:884	C:376	0.02887	0.000895	A:0.000015	C:0.000006	229594	9689	A:815	C:374	0.027025	0.00114	A:0.000096	C:0.000044	JU561	2X-1_S1	4	16	1761408	0.0300555	239283	0.0404918	2X	0.0315057
JU561_III:7999832:G->A_0248	G	A	2432332	73441	C:66	T:146	0.041102	0.001241	C:0.000001	T:0.000002	331949	13353	C:66	T:141	0.039074	0.001572	C:0.000008	T:0.000017	JU561	2X-1_S1	4	16	2505773	0.0293087	345302	0.0386705	2X	0.0315057
JU561_IV:7559511:G->A_0348	G	A	2121898	64090	C:434	T:684	0.035856	0.001083	C:0.000007	T:0.000012	310854	13461	C:432	T:656	0.036591	0.001584	C:0.000051	T:0.000077	JU561	2X-1_S1	4	16	2185988	0.0293186	324315	0.0415059	2X	0.0315057
JU561_V:1968268:C->G_0404	C	G	41203	1501	A:17	T:23	0.000696	2.5e-05	A:0.000000	T:0.000000	7655	291	A:11	T:12	0.000901	3.4e-05	A:0.000001	T:0.000001	JU561	2X-1_S1	4	16	42704	0.0351489	7946	0.0366222	2X	0.0315057
JU561_X:17631003:C->T_0627	C	T	928624	31085	A:744	G:50	0.015692	0.000525	A:0.000013	G:0.000001	140777	5648	A:667	G:50	0.016571	0.000665	A:0.000079	G:0.000006	JU561	2X-1_S1	4	16	959709	0.03239	146425	0.0385726	2X	0.0315057
JU561_I:8259121:C->T_0045	C	T	1034309	159929	A:115	G:95	0.019804	0.003062	A:0.000002	G:0.000002	242962	44048	A:114	G:94	0.026996	0.004894	A:0.000013	G:0.000010	JU561	2X-2_S2	2	4	1194238	0.133917	287010	0.153472	2X	0.125983
JU561_II:8928298:G->T_0168	G	T	1320667	186486	A:656	C:349	0.025287	0.003571	A:0.000013	C:0.000007	227547	38949	A:616	C:344	0.025284	0.004328	A:0.000068	C:0.000038	JU561	2X-2_S2	2	4	1507153	0.123734	266496	0.146152	2X	0.125983
JU561_III:7999832:G->A_0248	G	A	1769802	259890	C:54	T:148	0.033887	0.004976	C:0.000001	T:0.000003	316909	58006	C:54	T:143	0.035213	0.006445	C:0.000006	T:0.000016	JU561	2X-2_S2	2	4	2029692	0.128044	374915	0.154718	2X	0.125983
JU561_IV:7559511:G->A_0348	G	A	1839635	268110	C:462	T:618	0.035224	0.005134	C:0.000009	T:0.000012	310818	58629	C:462	T:608	0.034536	0.006514	C:0.000051	T:0.000068	JU561	2X-2_S2	2	4	2107745	0.127202	369447	0.158694	2X	0.125983
JU561_V:1968268:C->G_0404	C	G	8188	6018	A:7	T:6	0.000157	0.000115	A:0.000000	T:0.000000	1809	1346	A:7	T:6	0.000201	0.00015	A:0.000001	T:0.000001	JU561	2X-2_S2	2	4	14206	0.423624	3155	0.426624	2X	0.125983
JU561_X:17631003:C->T_0627	C	T	715760	112616	A:728	G:67	0.013705	0.002156	A:0.000014	G:0.000001	137628	24298	A:697	G:67	0.015292	0.0027	A:0.000077	G:0.000007	JU561	2X-2_S2	2	4	828376	0.135948	161926	0.150056	2X	0.125983
JU561_I:8259121:C->T_0045	C	T	725877	738599	A:128	G:165	0.011352	0.011551	A:0.000002	G:0.000003	173829	171081	A:126	G:160	0.017123	0.016852	A:0.000012	G:0.000016	JU561	2X-3_S3	0	1	1464476	0.504344	344910	0.496016	2X	0.5
JU561_II:8928298:G->T_0168	G	T	979190	916306	A:707	C:449	0.015314	0.014331	A:0.000011	C:0.000007	161885	153503	A:691	C:438	0.015946	0.015121	A:0.000068	C:0.000043	JU561	2X-3_S3	0	1	1895496	0.483412	315388	0.486712	2X	0.5
JU561_III:7999832:G->A_0248	G	A	1279116	1219692	C:179	T:161	0.020005	0.019075	C:0.000003	T:0.000003	228941	221974	C:179	T:157	0.022552	0.021865	C:0.000018	T:0.000015	JU561	2X-3_S3	0	1	2498808	0.48811	450915	0.492275	2X	0.5
JU561_IV:7559511:G->A_0348	G	A	1196692	1131192	C:550	T:684	0.018716	0.017691	C:0.000009	T:0.000011	222599	212348	C:549	T:678	0.021927	0.020917	C:0.000054	T:0.000067	JU561	2X-3_S3	0	1	2327884	0.485931	434947	0.488216	2X	0.5
JU561_V:1968268:C->G_0404	C	G	14757	28350	A:29	T:24	0.000231	0.000443	A:0.000000	T:0.000000	3302	6288	A:25	T:14	0.000325	0.000619	A:0.000002	T:0.000001	JU561	2X-3_S3	0	1	43107	0.657666	9590	0.655683	2X	0.5
JU561_X:17631003:C->T_0627	C	T	529419	547789	A:577	G:126	0.00828	0.008567	A:0.000009	G:0.000002	97725	102034	A:561	G:125	0.009626	0.010051	A:0.000055	G:0.000012	JU561	2X-3_S3	0	1	1077208	0.508527	199759	0.510785	2X	0.5
JU561_I:8259121:C->T_0045	C	T	1188856	3444	A:78	G:28	0.021661	6.3e-05	A:0.000001	G:0.000001	306904	1368	A:63	G:28	0.028524	0.000127	A:0.000006	G:0.000003	JU561	4X-1_S4	4	256	1192300	0.00288853	308272	0.00443764	4X	0.00292518
JU561_II:8928298:G->T_0168	G	T	1731800	5037	A:794	C:407	0.031554	9.2e-05	A:0.000014	C:0.000007	314380	2025	A:747	C:404	0.029219	0.000188	A:0.000069	C:0.000038	JU561	4X-1_S4	4	256	1736837	0.0029001	316405	0.00640003	4X	0.00292518
JU561_III:7999832:G->A_0248	G	A	2149025	5697	C:44	T:140	0.039156	0.000104	C:0.000001	T:0.000003	417172	2036	C:44	T:133	0.038772	0.000189	C:0.000004	T:0.000012	JU561	4X-1_S4	4	256	2154722	0.00264396	419208	0.00485678	4X	0.00292518
JU561_IV:7559511:G->A_0348	G	A	2031320	6130	C:409	T:616	0.037011	0.000112	C:0.000007	T:0.000011	393698	2622	C:409	T:607	0.03659	0.000244	C:0.000038	T:0.000056	JU561	4X-1_S4	4	256	2037450	0.00300866	396320	0.00661587	4X	0.00292518
JU561_V:1968268:C->G_0404	C	G	55254	196	A:35	T:26	0.001007	4e-06	A:0.000001	T:0.000000	15102	67	A:24	T:25	0.001404	6e-06	A:0.000002	T:0.000002	JU561	4X-1_S4	4	256	55450	0.00353472	15169	0.0044169	4X	0.00292518
JU561_X:17631003:C->T_0627	C	T	969642	2965	A:854	G:53	0.017667	5.4e-05	A:0.000016	G:0.000001	210380	1012	A:785	G:49	0.019553	9.4e-05	A:0.000073	G:0.000005	JU561	4X-1_S4	4	256	972607	0.00304851	211392	0.00478732	4X	0.00292518
JU561_I:8259121:C->T_0045	C	T	1419434	68725	A:123	G:56	0.022781	0.001103	A:0.000002	G:0.000001	308009	19811	A:106	G:52	0.029865	0.001921	A:0.000010	G:0.000005	JU561	4X-2_S5	2	16	1488159	0.0461812	327820	0.0604326	4X	0.0468779
JU561_II:8928298:G->T_0168	G	T	1691545	78397	A:819	C:392	0.027148	0.001258	A:0.000013	C:0.000006	282691	17740	A:767	C:381	0.02741	0.00172	A:0.000074	C:0.000037	JU561	4X-2_S5	2	16	1769942	0.0442935	300431	0.0590485	4X	0.0468779
JU561_III:7999832:G->A_0248	G	A	2324036	107720	C:70	T:147	0.037299	0.001729	C:0.000001	T:0.000002	392451	25461	C:70	T:146	0.038053	0.002469	C:0.000007	T:0.000014	JU561	4X-2_S5	2	16	2431756	0.0442972	417912	0.0609243	4X	0.0468779
JU561_IV:7559511:G->A_0348	G	A	2416785	114861	C:536	T:665	0.038787	0.001843	C:0.000009	T:0.000011	381323	26858	C:534	T:658	0.036974	0.002604	C:0.000052	T:0.000064	JU561	4X-2_S5	2	16	2531646	0.0453701	408181	0.0657992	4X	0.0468779
JU561_V:1968268:C->G_0404	C	G	5656	2771	A:2	T:7	9.1e-05	4.4e-05	A:0.000000	T:0.000000	1167	629	A:2	T:7	0.000113	6.1e-05	A:0.000000	T:0.000001	JU561	4X-2_S5	2	16	8427	0.328824	1796	0.350223	4X	0.0468779
JU561_X:17631003:C->T_0627	C	T	1054027	53732	A:993	G:64	0.016916	0.000862	A:0.000016	G:0.000001	189125	11558	A:898	G:64	0.018338	0.001121	A:0.000087	G:0.000006	JU561	4X-2_S5	2	16	1107759	0.0485051	200683	0.0575933	4X	0.0468779
JU561_I:8259121:C->T_0045	C	T	219966	1397788	A:165	G:277	0.003111	0.019769	A:0.000002	G:0.000004	84774	388948	A:165	G:276	0.005558	0.025498	A:0.000011	G:0.000018	JU561	4X-3_S6	0	1	1617754	0.86403	473722	0.821047	4X	0.750047
JU561_II:8928298:G->T_0168	G	T	329547	1963773	A:715	C:641	0.004661	0.027774	A:0.000010	C:0.000009	95456	414705	A:711	C:627	0.006258	0.027187	A:0.000047	C:0.000041	JU561	4X-3_S6	0	1	2293320	0.856301	510161	0.81289	4X	0.750047
JU561_III:7999832:G->A_0248	G	A	365899	2105379	C:294	T:165	0.005175	0.029777	C:0.000004	T:0.000002	116820	488230	C:294	T:165	0.007658	0.032007	C:0.000019	T:0.000011	JU561	4X-3_S6	0	1	2471278	0.851939	605050	0.806925	4X	0.750047
JU561_IV:7559511:G->A_0348	G	A	381860	2256832	C:676	T:744	0.005401	0.031919	C:0.000010	T:0.000011	119784	476477	C:676	T:744	0.007853	0.031237	C:0.000044	T:0.000049	JU561	4X-3_S6	0	1	2638692	0.855284	596261	0.799108	4X	0.750047
JU561_V:1968268:C->G_0404	C	G	4347	95779	A:39	T:37	6.1e-05	0.001355	A:0.000001	T:0.000001	1575	32683	A:39	T:37	0.000103	0.002143	A:0.000003	T:0.000002	JU561	4X-3_S6	0	1	100126	0.956585	34258	0.954025	4X	0.750047
JU561_X:17631003:C->T_0627	C	T	207997	1380139	A:474	G:192	0.002942	0.01952	A:0.000007	G:0.000003	64608	337726	A:461	G:191	0.004236	0.02214	A:0.000030	G:0.000013	JU561	4X-3_S6	0	1	1588136	0.869031	402334	0.839417	4X	0.750047
N2_II:12189177:T->A_0004	T	A	2096663	176076	C:569	G:658	0.03543	0.002975	C:0.000010	G:0.000011	349409	35741	C:568	G:650	0.041129	0.004207	C:0.000067	G:0.000077	N2	2X-1_S1	3	8	2272739	0.077473	385150	0.0927976	2X	0.0629913
N2_III:1318421:G->C_0006	G	C	432907	28	A:123	T:1641	0.007315	0	A:0.000002	T:0.000028	85804	27	A:103	T:556	0.0101	3e-06	A:0.000012	T:0.000065	N2	2X-1_S1	3	8	432935	6.47e-05	85831	0.000314572	2X	0.0629913
N2_III:1318421:G->C_0006_100bpCS	G	C	118793	866	A:5166	T:853	0.002007	1.5e-05	A:0.000087	T:0.000014	21725	288	A:1302	T:278	0.002557	3.4e-05	A:0.000153	T:0.000033	N2	2X-1_S1	3	8	119659	0.00723723	22013	0.0130832	2X	0.0629913
N2_III:2770134:T->G_0007	T	G	32218	32928	A:318	C:66	0.000544	0.000556	A:0.000005	C:0.000001	22700	23794	A:301	C:66	0.002672	0.002801	A:0.000035	C:0.000008	N2	2X-1_S1	3	8	65146	0.505449	46494	0.511765	2X	0.0629913
N2_II:12189177:T->A_0004	T	A	1995992	175224	C:523	G:667	0.038218	0.003355	C:0.000010	G:0.000013	355553	38990	C:516	G:615	0.039507	0.004332	C:0.000057	G:0.000068	N2	2X-2_S2	3	8	2171216	0.0807032	394543	0.0988232	2X	0.0629913
N2_III:1318421:G->C_0006	G	C	415641	29	A:91	T:991	0.007958	1e-06	A:0.000002	T:0.000019	91747	27	A:90	T:523	0.010194	3e-06	A:0.000010	T:0.000058	N2	2X-2_S2	3	8	415670	6.98e-05	91774	0.000294201	2X	0.0629913
N2_III:1318421:G->C_0006_100bpCS	G	C	103472	895	A:5292	T:886	0.001981	1.7e-05	A:0.000101	T:0.000017	22024	335	A:1466	T:273	0.002447	3.7e-05	A:0.000163	T:0.000030	N2	2X-2_S2	3	8	104367	0.00857551	22359	0.0149828	2X	0.0629913
N2_III:2770134:T->G_0007	T	G	73351	6185	A:381	C:94	0.001404	0.000118	A:0.000007	C:0.000002	46342	5557	A:363	C:94	0.005149	0.000617	A:0.000040	C:0.000010	N2	2X-2_S2	3	8	79536	0.0777635	51899	0.107073	2X	0.0629913
N2_II:12189177:T->A_0004	T	A	2214929	180111	C:620	G:715	0.03464	0.002817	C:0.000010	G:0.000011	386856	40030	C:617	G:675	0.038107	0.003943	C:0.000061	G:0.000066	N2	2X-3_S3	3	8	2395040	0.0752017	426886	0.0937721	2X	0.0629913
N2_III:1318421:G->C_0006	G	C	484300	32	A:140	T:1577	0.007574	1e-06	A:0.000002	T:0.000025	107519	21	A:134	T:733	0.010591	2e-06	A:0.000013	T:0.000072	N2	2X-3_S3	3	8	484332	6.61e-05	107540	0.000195276	2X	0.0629913
N2_III:1318421:G->C_0006_100bpCS	G	C	123674	904	A:6430	T:822	0.001934	1.4e-05	A:0.000101	T:0.000013	26107	337	A:1706	T:274	0.002572	3.3e-05	A:0.000168	T:0.000027	N2	2X-3_S3	3	8	124578	0.0072565	26444	0.0127439	2X	0.0629913
N2_III:2770134:T->G_0007	T	G	5685	10814	A:135	C:53	8.9e-05	0.000169	A:0.000002	C:0.000001	4409	8141	A:100	C:50	0.000434	0.000802	A:0.000010	C:0.000005	N2	2X-3_S3	3	8	16499	0.655434	12550	0.648685	2X	0.0629913
N2_II:12189177:T->A_0004	T	A	2035547	12768	C:490	G:658	0.037088	0.000233	C:0.000009	G:0.000012	426272	4064	C:490	G:628	0.039618	0.000378	C:0.000046	G:0.000058	N2	4X-1_S4	3	64	2048315	0.00623342	430336	0.00944378	4X	0.0117195
N2_III:1318421:G->C_0006	G	C	393042	12	A:114	T:1518	0.007161	0	A:0.000002	T:0.000028	110811	12	A:110	T:701	0.010299	1e-06	A:0.000010	T:0.000065	N2	4X-1_S4	3	64	393054	3.05e-05	110823	0.000108281	4X	0.0117195
N2_III:1318421:G->C_0006_100bpCS	G	C	119588	640	A:6321	T:780	0.002179	1.2e-05	A:0.000115	T:0.000014	32139	277	A:2095	T:303	0.002987	2.6e-05	A:0.000195	T:0.000028	N2	4X-1_S4	3	64	120228	0.00532322	32416	0.00854516	4X	0.0117195
N2_III:2770134:T->G_0007	T	G	34366	56576	A:384	C:72	0.000626	0.001031	A:0.000007	C:0.000001	27029	42753	A:353	C:72	0.002512	0.003973	A:0.000033	C:0.000007	N2	4X-1_S4	3	64	90942	0.622111	69782	0.612665	4X	0.0117195
N2_II:12189177:T->A_0004	T	A	2661426	17285	C:614	G:827	0.042714	0.000277	C:0.000010	G:0.000013	438920	4601	C:612	G:796	0.042558	0.000446	C:0.000059	G:0.000077	N2	4X-2_S5	3	64	2678711	0.00645273	443521	0.0103738	4X	0.0117195
N2_III:1318421:G->C_0006	G	C	512851	22	A:125	T:1156	0.008231	0	A:0.000002	T:0.000019	113774	22	A:124	T:563	0.011032	2e-06	A:0.000012	T:0.000055	N2	4X-2_S5	3	64	512873	4.29e-05	113796	0.000193328	4X	0.0117195
N2_III:1318421:G->C_0006_100bpCS	G	C	124609	1049	A:6732	T:833	0.002	1.7e-05	A:0.000108	T:0.000013	27390	346	A:1902	T:258	0.002656	3.4e-05	A:0.000184	T:0.000025	N2	4X-2_S5	3	64	125658	0.00834806	27736	0.0124748	4X	0.0117195
N2_III:2770134:T->G_0007	T	G	111135	7149	A:552	C:132	0.001784	0.000115	A:0.000009	C:0.000002	67972	6675	A:525	C:132	0.006591	0.000647	A:0.000051	C:0.000013	N2	4X-2_S5	3	64	118284	0.0604393	74647	0.0894209	4X	0.0117195
N2_II:12189177:T->A_0004	T	A	2776311	10522	C:675	G:818	0.039267	0.000149	C:0.000010	G:0.000012	564854	4129	C:669	G:799	0.03703	0.000271	C:0.000044	G:0.000052	N2	4X-3_S6	3	64	2786833	0.00377561	568983	0.00725681	4X	0.0117195
N2_III:1318421:G->C_0006	G	C	439446	19	A:119	T:1023	0.006215	0	A:0.000002	T:0.000014	161946	19	A:115	T:622	0.010617	1e-06	A:0.000008	T:0.000041	N2	4X-3_S6	3	64	439465	4.32e-05	161965	0.000117309	4X	0.0117195
N2_III:1318421:G->C_0006_100bpCS	G	C	121433	505	A:10275	T:1045	0.001717	7e-06	A:0.000145	T:0.000015	46994	246	A:4363	T:471	0.003081	1.6e-05	A:0.000286	T:0.000031	N2	4X-3_S6	3	64	121938	0.00414145	47240	0.00520745	4X	0.0117195
N2_III:2770134:T->G_0007	T	G	922	3925	A:87	C:27	1.3e-05	5.6e-05	A:0.000001	C:0.000000	845	3310	A:68	C:24	5.5e-05	0.000217	A:0.000004	C:0.000002	N2	4X-3_S6	3	64	4847	0.809779	4155	0.796631	4X	0.0117195

## Sheet: Rep1_d1_baseline
# sample ID:	L1.combined
# reads in library:	41478210	(35466541 unique UMIs)
# reads with lig_probe sequence:	38590929	(27854988 unique UMIs)
# reads with lig_probe and scan sequence (up to SNP):	27963430	(23202340 unique UMIs)
# reads with no match:	2887281	(2586429 unique UMIs)
mip_name	ref	alt	ref_read_count	alt_read_count	other1_read_count	other2_read_count	ref_read_freq	alt_read_freq	other1_read_freq	other2_read_freq	ref_umi_count	alt_umi_count	other1_umi_count	other2_umi_count	ref_umi_freq	alt_umi_freq	other1_umi_freq	other2_umi_freq
CB4854_I:1341686:T->C,A_0099	T	C	87588	131	A:937	G:7	0.003132	5e-06	A:0.000034	G:0.000000	74935	120	A:861	G:7	0.00323	5e-06	A:0.000037	G:0.000000
ECA348_V:19083280:A->G,C_0727	A	G	61929	43331	C:87	T:13	0.002215	0.00155	C:0.000003	T:0.000000	54171	35388	C:79	T:13	0.002335	0.001525	C:0.000003	T:0.000001
JU1652_III:12677731:C->T,G_1197	C	T	41720	1681	A:6	G:2	0.001492	6e-05	A:0.000000	G:0.000000	35976	1513	A:6	G:2	0.001551	6.5e-05	A:0.000000	G:0.000000
JU1793_V:4157532:G->C,A_0307	G	C	48282	6	A:11	T:17	0.001727	0	A:0.000000	T:0.000001	42138	5	A:10	T:17	0.001816	0	A:0.000000	T:0.000001
JU2316_V:3840034:C->T,A_0362	C	T	70411	2	A:8	G:3	0.002518	0	A:0.000000	G:0.000000	61119	2	A:7	G:3	0.002634	0	A:0.000000	G:0.000000
MY23_II:13379927:A->G,T_0536	A	G	69116	8	C:18	T:4143	0.002472	0	C:0.000001	T:0.000148	57835	7	C:18	T:3688	0.002493	0	C:0.000001	T:0.000159
NIC195_III:12677731:C->G,T_0554	C	G	0	0	A:0	T:0	0	0	A:0	T:0	0	0	A:0	T:0	0	0	A:0	T:0
NIC258_I:3170723:G->T,A_0026	G	T	31954	2799	A:1526	C:3	0.001143	0.0001	A:0.000055	C:0.000000	28307	2435	A:1401	C:3	0.00122	0.000105	A:0.000060	C:0.000000
NIC523_II:3632053:A->T,C_0353	A	T	92598	951	C:20437	G:17	0.003311	3.4e-05	C:0.000731	G:0.000001	78398	867	C:15542	G:17	0.003379	3.7e-05	C:0.000670	G:0.000001
CB4854_II:14776068:G->A_1044	G	A	21465	84	C:8	T:23	0.000768	3e-06	C:0.000000	T:0.000001	19080	75	C:8	T:23	0.000822	3e-06	C:0.000000	T:0.000001
CB4854_IV:13844144:T->C_1393	T	C	0	0	A:0	G:1	0	0	A:0	G:0.000000	0	0	A:0	G:1	0	0	A:0	G:0.000000
CB4854_X:15144403:A->T_1770	A	T	55254	126	C:68	G:66	0.001976	5e-06	C:0.000002	G:0.000002	47592	122	C:67	G:65	0.002051	5e-06	C:0.000003	G:0.000003
CB4856_I:9767293:G->A_2812	G	A	66802	343	C:7	T:14	0.002389	1.2e-05	C:0.000000	T:0.000001	57480	304	C:7	T:14	0.002477	1.3e-05	C:0.000000	T:0.000001
CB4856_III:1209062:A->G_9612	A	G	22920	103	C:4	T:3	0.00082	4e-06	C:0.000000	T:0.000000	20336	99	C:4	T:3	0.000876	4e-06	C:0.000000	T:0.000000
CB4856_IV:1607284:A->C_12264	A	C	71139	543	G:66	T:50	0.002544	1.9e-05	G:0.000002	T:0.000002	60757	506	G:66	T:50	0.002619	2.2e-05	G:0.000003	T:0.000002
CB4856_X:13967551:G->A_23167	G	A	69267	276	C:10	T:17	0.002477	1e-05	C:0.000000	T:0.000001	59575	249	C:10	T:17	0.002568	1.1e-05	C:0.000000	T:0.000001
CX11254_II:12788569:T->A_0182	T	A	31975	0	C:5	G:8	0.001143	0	C:0.000000	G:0.000000	28324	0	C:5	G:8	0.001221	0	C:0.000000	G:0.000000
CX11254_III:10578934:G->A_0248	G	A	89392	147	C:47	T:35	0.003197	5e-06	C:0.000002	T:0.000001	76561	136	C:46	T:34	0.0033	6e-06	C:0.000002	T:0.000001
CX11254_V:13687742:A->C_0333	A	C	92831	9	G:11	T:7	0.00332	0	G:0.000000	T:0.000000	79167	9	G:11	T:7	0.003412	0	G:0.000000	T:0.000000
CX11254_V:238621:A->G_0301	A	G	88408	141	C:24	T:23	0.003162	5e-06	C:0.000001	T:0.000001	75101	125	C:24	T:23	0.003237	5e-06	C:0.000001	T:0.000001
CX11262_I:12073209:C->A_0057	C	A	15471	2	G:0	T:2	0.000553	0	G:0	T:0.000000	13801	2	G:0	T:2	0.000595	0	G:0	T:0.000000
CX11262_III:12331372:T->A_0209	T	A	36511	113	C:8	G:1013	0.001306	4e-06	C:0.000000	G:0.000036	31670	100	C:7	G:871	0.001365	4e-06	C:0.000000	G:0.000038
CX11262_V:19829399:C->T_0424	C	T	80534	1693	A:164	G:15	0.00288	6.1e-05	A:0.000006	G:0.000001	64577	1321	A:132	G:13	0.002783	5.7e-05	A:0.000006	G:0.000001
CX11264_IV:11244600:G->A_0125	G	A	98731	926	C:147	T:222	0.003531	3.3e-05	C:0.000005	T:0.000008	80248	851	C:146	T:221	0.003459	3.7e-05	C:0.000006	T:0.000010
CX11264_V:17198338:C->G_0165	C	G	77106	579	A:16	T:6	0.002757	2.1e-05	A:0.000001	T:0.000000	64667	533	A:15	T:6	0.002787	2.3e-05	A:0.000001	T:0.000000
CX11264_X:2275255:G->C_0412	G	C	80560	563	A:9	T:31	0.002881	2e-05	A:0.000000	T:0.000001	68261	515	A:9	T:31	0.002942	2.2e-05	A:0.000000	T:0.000001
CX11264_X:6426986:A->C_0583	A	C	61712	438	G:14	T:18	0.002207	1.6e-05	G:0.000001	T:0.000001	51857	383	G:14	T:18	0.002235	1.7e-05	G:0.000001	T:0.000001
CX11271_I:10356319:G->A_0062	G	A	106225	1897	C:18	T:39	0.003799	6.8e-05	C:0.000001	T:0.000001	87513	1653	C:18	T:39	0.003772	7.1e-05	C:0.000001	T:0.000002
CX11271_II:12842575:T->A_0147	T	A	7846	116	C:2	G:1	0.000281	4e-06	C:0.000000	G:0.000000	7108	105	C:2	G:1	0.000306	5e-06	C:0.000000	G:0.000000
CX11271_III:2697403:C->G_0218	C	G	34036	625	A:4	T:3	0.001217	2.2e-05	A:0.000000	T:0.000000	30480	574	A:4	T:3	0.001314	2.5e-05	A:0.000000	T:0.000000
CX11271_IV:1231923:C->T_0690	C	T	45353	1005	A:8	G:3	0.001622	3.6e-05	A:0.000000	G:0.000000	39546	885	A:8	G:3	0.001704	3.8e-05	A:0.000000	G:0.000000
CX11276_I:11281245:C->T_0361	C	T	58336	348	A:10	G:3	0.002086	1.2e-05	A:0.000000	G:0.000000	50920	313	A:10	G:3	0.002195	1.3e-05	A:0.000000	G:0.000000
CX11276_III:359396:G->A_1022	G	A	42195	277	C:34	T:24	0.001509	1e-05	C:0.000001	T:0.000001	36187	245	C:34	T:23	0.00156	1.1e-05	C:0.000001	T:0.000001
CX11276_V:20320751:A->G_1810	A	G	74559	534	C:97	T:75	0.002666	1.9e-05	C:0.000003	T:0.000003	63421	488	C:97	T:75	0.002733	2.1e-05	C:0.000004	T:0.000003
CX11276_X:15381676:C->T_2053	C	T	13836	84	A:36	G:9	0.000495	3e-06	A:0.000001	G:0.000000	12972	79	A:36	G:9	0.000559	3e-06	A:0.000002	G:0.000000
CX11285_II:9262194:G->A_0142	G	A	90328	700	C:9	T:17	0.00323	2.5e-05	C:0.000000	T:0.000001	74959	621	C:9	T:17	0.003231	2.7e-05	C:0.000000	T:0.000001
CX11285_III:12362318:G->C_0276	G	C	21251	1	A:2	T:4	0.00076	0	A:0.000000	T:0.000000	19172	1	A:2	T:4	0.000826	0	A:0.000000	T:0.000000
CX11285_IV:4747802:C->A_0343	C	A	50013	472	G:0	T:4	0.001789	1.7e-05	G:0	T:0.000000	43192	427	G:0	T:4	0.001862	1.8e-05	G:0	T:0.000000
CX11285_X:7864359:A->C_0624	A	C	33744	415	G:11	T:7	0.001207	1.5e-05	G:0.000000	T:0.000000	29866	369	G:11	T:7	0.001287	1.6e-05	G:0.000000	T:0.000000
CX11307_I:11966814:T->G_0086	T	G	58694	397	A:8	C:30	0.002099	1.4e-05	A:0.000000	C:0.000001	51581	373	A:8	C:30	0.002223	1.6e-05	A:0.000000	C:0.000001
CX11307_II:11271250:G->A_0349	G	A	63309	433	C:9	T:21	0.002264	1.5e-05	C:0.000000	T:0.000001	55465	394	C:9	T:21	0.00239	1.7e-05	C:0.000000	T:0.000001
CX11307_IV:16321575:C->T_0502	C	T	33721	325	A:6	G:0	0.001206	1.2e-05	A:0.000000	G:0	29599	298	A:5	G:0	0.001276	1.3e-05	A:0.000000	G:0
CX11307_V:16498729:A->T_0707	A	T	31934	0	C:1	G:4	0.001142	0	C:0.000000	G:0.000000	28397	0	C:1	G:4	0.001224	0	C:0.000000	G:0.000000
DL200_I:14791278:G->A_0113	G	A	67238	2185	C:12	T:18	0.002404	7.8e-05	C:0.000000	T:0.000001	58281	1953	C:12	T:18	0.002512	8.4e-05	C:0.000001	T:0.000001
DL200_II:10684581:C->T_0188	C	T	27699	17758	A:4	G:7	0.000991	0.000635	A:0.000000	G:0.000000	24472	15850	A:4	G:7	0.001055	0.000683	A:0.000000	G:0.000000
DL200_V:17954136:A->G_0656	A	G	74248	1769	C:14	T:4	0.002655	6.3e-05	C:0.000001	T:0.000000	62641	1587	C:14	T:4	0.0027	6.8e-05	C:0.000001	T:0.000000
DL200_X:16129009:C->T_0867	C	T	44499	1238	A:36	G:20	0.001591	4.4e-05	A:0.000001	G:0.000001	38679	1135	A:34	G:20	0.001667	4.9e-05	A:0.000001	G:0.000001
DL226_I:15015474:A->T_0374	A	T	103910	324	C:27	G:14	0.003716	1.2e-05	C:0.000001	G:0.000001	87972	303	C:27	G:14	0.003792	1.3e-05	C:0.000001	G:0.000001
DL226_II:9596545:G->T_0445	G	T	46149	27758	A:8	C:23	0.00165	0.000993	A:0.000000	C:0.000001	41324	25383	A:7	C:23	0.001781	0.001094	A:0.000000	C:0.000001
DL226_IV:13272736:G->A_0890	G	A	66412	256	C:18	T:15	0.002375	9e-06	C:0.000001	T:0.000001	57229	228	C:17	T:13	0.002467	1e-05	C:0.000001	T:0.000001
DL226_V:16590610:A->T_1043	A	T	38611	304	C:42	G:66	0.001381	1.1e-05	C:0.000002	G:0.000002	33777	277	C:42	G:65	0.001456	1.2e-05	C:0.000002	G:0.000003
DL238_I:12524422:A->T_2849	A	T	14186	177	C:4	G:9	0.000507	6e-06	C:0.000000	G:0.000000	12536	154	C:4	G:9	0.00054	7e-06	C:0.000000	G:0.000000
DL238_II:12072245:G->T_7537	G	T	79	0	A:0	C:0	3e-06	0	A:0	C:0	75	0	A:0	C:0	3e-06	0	A:0	C:0
DL238_III:12556120:G->T_11662	G	T	105291	1236	A:4	C:19	0.003765	4.4e-05	A:0.000000	C:0.000001	87886	1112	A:4	C:19	0.003788	4.8e-05	A:0.000000	C:0.000001
DL238_IV:807883:A->T_12381	A	T	81967	1101	C:87	G:51	0.002931	3.9e-05	C:0.000003	G:0.000002	68605	979	C:85	G:50	0.002957	4.2e-05	C:0.000004	G:0.000002
ECA189_I:11586767:T->A_0519	T	A	86711	177	C:42	G:83	0.003101	6e-06	C:0.000002	G:0.000003	73744	168	C:41	G:83	0.003178	7e-06	C:0.000002	G:0.000004
ECA189_III:3209354:T->C_3149	T	C	57789	110	A:5	G:19	0.002067	4e-06	A:0.000000	G:0.000001	50291	101	A:5	G:19	0.002167	4e-06	A:0.000000	G:0.000001
ECA189_IV:16342115:G->A_5404	G	A	34975	63	C:7	T:1	0.001251	2e-06	C:0.000000	T:0.000000	31293	59	C:6	T:1	0.001349	3e-06	C:0.000000	T:0.000000
ECA189_V:18750651:G->A_7860	G	A	45753	293	C:11	T:17	0.001636	1e-05	C:0.000000	T:0.000001	39684	282	C:11	T:17	0.00171	1.2e-05	C:0.000000	T:0.000001
ECA191_I:14707170:A->G_5392	A	G	111301	95	C:105	T:30	0.00398	3e-06	C:0.000004	T:0.000001	93071	94	C:102	T:30	0.004011	4e-06	C:0.000004	T:0.000001
ECA191_II:11937699:A->G_9779	A	G	103851	1093	C:154	T:92	0.003714	3.9e-05	C:0.000006	T:0.000003	87304	985	C:154	T:91	0.003763	4.2e-05	C:0.000007	T:0.000004
ECA191_III:13349506:G->C_16643	G	C	106939	1226	A:7209	T:78	0.003824	4.4e-05	A:0.000258	T:0.000003	89539	1094	A:7001	T:77	0.003859	4.7e-05	A:0.000302	T:0.000003
ECA191_IV:1126414:G->A_17243	G	A	103223	1171	C:12	T:22	0.003691	4.2e-05	C:0.000000	T:0.000001	85608	1052	C:12	T:22	0.00369	4.5e-05	C:0.000001	T:0.000001
ECA348_II:1153436:G->A_0106	G	A	109965	46562	C:31	T:40	0.003932	0.001665	C:0.000001	T:0.000001	90269	39622	C:30	T:40	0.003891	0.001708	C:0.000001	T:0.000002
ECA348_III:1413663:G->T_0380	G	T	16869	4	A:4	C:0	0.000603	0	A:0.000000	C:0	15395	4	A:4	C:0	0.000664	0	A:0.000000	C:0
ECA348_IV:1833820:C->T_0459	C	T	106416	5	A:27	G:2	0.003806	0	A:0.000001	G:0.000000	90042	5	A:27	G:2	0.003881	0	A:0.000001	G:0.000000
ECA363_I:2855432:G->T_0582	G	T	15991	350	A:0	C:3	0.000572	1.3e-05	A:0	C:0.000000	14351	318	A:0	C:3	0.000619	1.4e-05	A:0	C:0.000000
ECA363_II:15266803:A->C_8126	A	C	103175	2475	G:47	T:27	0.00369	8.9e-05	G:0.000002	T:0.000001	86802	2241	G:47	T:27	0.003741	9.7e-05	G:0.000002	T:0.000001
ECA363_III:11578112:G->T_11060	G	T	13822	182	A:4	C:5	0.000494	7e-06	A:0.000000	C:0.000000	12266	170	A:3	C:5	0.000529	7e-06	A:0.000000	C:0.000000
ECA363_IV:16962528:A->T_14602	A	T	81996	1849	C:18	G:7	0.002932	6.6e-05	C:0.000001	G:0.000000	69375	1684	C:17	G:7	0.00299	7.3e-05	C:0.000001	G:0.000000
ECA369_I:7301895:A->T_2312	A	T	98172	114	C:16	G:5	0.003511	4e-06	C:0.000001	G:0.000000	84188	101	C:16	G:5	0.003628	4e-06	C:0.000001	G:0.000000
ECA369_II:11110077:A->C_10550	A	C	80860	110	G:10	T:6	0.002892	4e-06	G:0.000000	T:0.000000	69561	92	G:10	T:6	0.002998	4e-06	G:0.000000	T:0.000000
ECA369_III:9234831:T->C_14531	T	C	78453	103	A:6	G:24	0.002806	4e-06	A:0.000000	G:0.000001	67488	92	A:6	G:24	0.002909	4e-06	A:0.000000	G:0.000001
ECA369_IV:2126314:A->T_17026	A	T	12614	11	C:7	G:0	0.000451	0	C:0.000000	G:0	11233	10	C:6	G:0	0.000484	0	C:0.000000	G:0
ECA36_I:14280567:G->A_2727	G	A	39918	659	C:4	T:11	0.001428	2.4e-05	C:0.000000	T:0.000000	35366	607	C:4	T:11	0.001524	2.6e-05	C:0.000000	T:0.000000
ECA36_II:4106388:G->A_4154	G	A	89720	1349	C:13	T:15	0.003208	4.8e-05	C:0.000000	T:0.000001	74478	1201	C:13	T:15	0.00321	5.2e-05	C:0.000001	T:0.000001
ECA36_III:3384340:A->T_5733	A	T	80184	1156	C:5	G:11	0.002867	4.1e-05	C:0.000000	G:0.000000	68190	1040	C:5	G:11	0.002939	4.5e-05	C:0.000000	G:0.000000
ECA36_V:11695823:G->A_9401	G	A	112725	1694	C:28	T:52	0.004031	6.1e-05	C:0.000001	T:0.000002	92471	1537	C:28	T:52	0.003985	6.6e-05	C:0.000001	T:0.000002
ECA372_I:10364967:A->C_0096	A	C	73523	292	G:30	T:9	0.002629	1e-05	G:0.000001	T:0.000000	63245	271	G:30	T:9	0.002726	1.2e-05	G:0.000001	T:0.000000
ECA372_II:11316190:A->T_0369	A	T	55814	231	C:13	G:3	0.001996	8e-06	C:0.000000	G:0.000000	49277	208	C:13	G:3	0.002124	9e-06	C:0.000001	G:0.000000
ECA372_III:11364415:T->A_1258	T	A	77549	400	C:41	G:26	0.002773	1.4e-05	C:0.000001	G:0.000001	67241	375	C:41	G:24	0.002898	1.6e-05	C:0.000002	G:0.000001
ECA372_IV:2045158:T->C_1388	T	C	282144	41881	A:231	G:2701	0.01009	0.001498	A:0.000008	G:0.000097	215089	35622	A:199	G:2383	0.00927	0.001535	A:0.000009	G:0.000103
ECA396_I:3015432:A->G_2360	A	G	123629	5748	C:87	T:34	0.004421	0.000206	C:0.000003	T:0.000001	102438	5085	C:87	T:34	0.004415	0.000219	C:0.000004	T:0.000001
ECA396_II:13495597:A->T_10714	A	T	14595	976	C:3	G:2	0.000522	3.5e-05	C:0.000000	G:0.000000	13233	895	C:3	G:2	0.00057	3.9e-05	C:0.000000	G:0.000000
ECA396_III:10621403:A->T_15513	A	T	76876	3228	C:23	G:10	0.002749	0.000115	C:0.000001	G:0.000000	65672	2922	C:23	G:10	0.00283	0.000126	C:0.000001	G:0.000000
ECA396_IV:1970902:T->G_19550	T	G	44466	1729	A:2	C:13	0.00159	6.2e-05	A:0.000000	C:0.000000	38864	1550	A:2	C:12	0.001675	6.7e-05	A:0.000000	C:0.000001
ED3017_II:7097200:A->G_0150	A	G	21965	22	C:22	T:6	0.000785	1e-06	C:0.000001	T:0.000000	19445	21	C:22	T:6	0.000838	1e-06	C:0.000001	T:0.000000
ED3017_III:6807400:C->T_0264	C	T	15639	17	A:4	G:0	0.000559	1e-06	A:0.000000	G:0	14195	16	A:3	G:0	0.000612	1e-06	A:0.000000	G:0
ED3017_V:1262829:A->G_0389	A	G	52521	44	C:29	T:19	0.001878	2e-06	C:0.000001	T:0.000001	45956	43	C:29	T:17	0.001981	2e-06	C:0.000001	T:0.000001
ED3017_X:11778002:A->G_0598	A	G	65617	74	C:19	T:12	0.002347	3e-06	C:0.000001	T:0.000000	57453	64	C:18	T:12	0.002476	3e-06	C:0.000001	T:0.000001
ED3049_I:12027316:C->T_0038	C	T	200116	5646	A:43	G:19	0.007156	0.000202	A:0.000002	G:0.000001	147369	4598	A:39	G:19	0.006351	0.000198	A:0.000002	G:0.000001
ED3049_II:3204961:G->A_0083	G	A	5744	3	C:0	T:5	0.000205	0	C:0	T:0.000000	5188	3	C:0	T:5	0.000224	0	C:0	T:0.000000
ED3049_III:11014743:C->T_0123	C	T	22729	40	A:0	G:1	0.000813	1e-06	A:0	G:0.000000	20426	37	A:0	G:1	0.00088	2e-06	A:0	G:0.000000
ED3049_X:16679324:T->A_0225	T	A	91421	183	C:34	G:26	0.003269	7e-06	C:0.000001	G:0.000001	77820	167	C:34	G:26	0.003354	7e-06	C:0.000001	G:0.000001
ED3052_I:7194841:C->T_0050	C	T	91382	126	A:13	G:6	0.003268	5e-06	A:0.000000	G:0.000000	77261	108	A:13	G:6	0.00333	5e-06	A:0.000001	G:0.000000
ED3052_IV:2165510:T->A_0315	T	A	86198	90	C:30	G:22	0.003083	3e-06	C:0.000001	G:0.000001	74057	83	C:29	G:22	0.003192	4e-06	C:0.000001	G:0.000001
ED3052_V:20525028:C->A_0538	C	A	99796	160	G:5	T:11	0.003569	6e-06	G:0.000000	T:0.000000	83380	141	G:5	T:11	0.003594	6e-06	G:0.000000	T:0.000000
ED3052_X:8969998:A->C_0604	A	C	85175	124	G:57	T:19	0.003046	4e-06	G:0.000002	T:0.000001	72748	116	G:56	T:19	0.003135	5e-06	G:0.000002	T:0.000001
ED3077_I:2393375:A->T_0027	A	T	72283	892	C:17	G:9	0.002585	3.2e-05	C:0.000001	G:0.000000	61948	812	C:17	G:9	0.00267	3.5e-05	C:0.000001	G:0.000000
ED3077_II:5937487:C->G_0195	C	G	45833	573	A:11	T:9	0.001639	2e-05	A:0.000000	T:0.000000	40496	513	A:10	T:9	0.001745	2.2e-05	A:0.000000	T:0.000000
ED3077_IV:16879562:G->A_0482	G	A	143402	1458	C:25	T:25	0.005128	5.2e-05	C:0.000001	T:0.000001	107489	1292	C:24	T:25	0.004633	5.6e-05	C:0.000001	T:0.000001
ED3077_X:8913678:T->C_0771	T	C	52892	744	A:1	G:29	0.001891	2.7e-05	A:0.000000	G:0.000001	45106	630	A:1	G:29	0.001944	2.7e-05	A:0.000000	G:0.000001
EG4724_II:7136618:G->A_0180	G	A	79960	261	C:11	T:6	0.002859	9e-06	C:0.000000	T:0.000000	67269	242	C:11	T:6	0.002899	1e-05	C:0.000000	T:0.000000
EG4724_III:10636443:T->C_0370	T	C	101302	319	A:7	G:27	0.003623	1.1e-05	A:0.000000	G:0.000001	84149	289	A:7	G:27	0.003627	1.2e-05	A:0.000000	G:0.000001
EG4724_IV:17009681:A->G_0675	A	G	83591	188	C:37	T:8	0.002989	7e-06	C:0.000001	T:0.000000	70899	165	C:37	T:8	0.003056	7e-06	C:0.000002	T:0.000000
EG4724_X:14548706:A->T_0884	A	T	94453	206	C:27	G:29	0.003378	7e-06	C:0.000001	G:0.000001	78131	194	C:26	G:27	0.003367	8e-06	C:0.000001	G:0.000001
EG4725_I:39226:C->A_0001	C	A	35524	379	G:2	T:3	0.00127	1.4e-05	G:0.000000	T:0.000000	31401	342	G:2	T:3	0.001353	1.5e-05	G:0.000000	T:0.000000
EG4725_II:14784049:A->C_0335	A	C	14332	134	G:12	T:10	0.000513	5e-06	G:0.000000	T:0.000000	12836	123	G:12	T:10	0.000553	5e-06	G:0.000001	T:0.000000
EG4725_III:12433227:C->A_0601	C	A	43565	10566	G:6	T:12	0.001558	0.000378	G:0.000000	T:0.000000	37586	9423	G:6	T:12	0.00162	0.000406	G:0.000000	T:0.000001
EG4725_X:13347083:A->T_2067	A	T	69884	888	C:19	G:21	0.002499	3.2e-05	C:0.000001	G:0.000001	60345	790	C:19	G:21	0.002601	3.4e-05	C:0.000001	G:0.000001
GXW1_II:12402155:A->G_0303	A	G	70062	891	C:25	T:7	0.002505	3.2e-05	C:0.000001	T:0.000000	61253	799	C:25	T:7	0.00264	3.4e-05	C:0.000001	T:0.000000
GXW1_III:2725552:G->A_0397	G	A	101065	969	C:10	T:17	0.003614	3.5e-05	C:0.000000	T:0.000001	86560	878	C:10	T:17	0.003731	3.8e-05	C:0.000000	T:0.000001
GXW1_V:18684493:A->G_0830	A	G	63735	767	C:22	T:13	0.002279	2.7e-05	C:0.000001	T:0.000000	54301	684	C:22	T:13	0.00234	2.9e-05	C:0.000001	T:0.000001
GXW1_X:12028861:C->T_0941	C	T	65920	642	A:7	G:3	0.002357	2.3e-05	A:0.000000	G:0.000000	56598	579	A:7	G:3	0.002439	2.5e-05	A:0.000000	G:0.000000
JU1212_I:11540544:C->G_0174	C	G	20239	35	A:2	T:1	0.000724	1e-06	A:0.000000	T:0.000000	17803	31	A:2	T:1	0.000767	1e-06	A:0.000000	T:0.000000
JU1212_II:10563991:T->C_0567	T	C	74730	170	A:3	G:11	0.002672	6e-06	A:0.000000	G:0.000000	65118	160	A:3	G:11	0.002807	7e-06	A:0.000000	G:0.000000
JU1212_III:8737128:A->T_0615	A	T	57822	106	C:54	G:30	0.002068	4e-06	C:0.000002	G:0.000001	50508	99	C:54	G:30	0.002177	4e-06	C:0.000002	G:0.000001
JU1212_V:9120137:A->C_0768	A	C	74540	175	G:68	T:31	0.002666	6e-06	G:0.000002	T:0.000001	63615	163	G:68	T:31	0.002742	7e-06	G:0.000003	T:0.000001
JU1400_I:2752711:A->G_0030	A	G	54460	28	C:8	T:3	0.001948	1e-06	C:0.000000	T:0.000000	46425	26	C:8	T:3	0.002001	1e-06	C:0.000000	T:0.000000
JU1400_II:4073439:A->T_0295	A	T	101953	55	C:18	G:26	0.003646	2e-06	C:0.000001	G:0.000001	83626	51	C:18	G:25	0.003604	2e-06	C:0.000001	G:0.000001
JU1400_III:11372974:C->T_0900	C	T	78782	56	A:22	G:20	0.002817	2e-06	A:0.000001	G:0.000001	65712	54	A:22	G:20	0.002832	2e-06	A:0.000001	G:0.000001
JU1400_X:2853367:T->A_1277	T	A	38767	42	C:10	G:21	0.001386	2e-06	C:0.000000	G:0.000001	34285	39	C:10	G:21	0.001478	2e-06	C:0.000000	G:0.000001
JU1581_I:8999758:C->T_0517	C	T	55636	33	A:15	G:2	0.00199	1e-06	A:0.000001	G:0.000000	49029	30	A:14	G:2	0.002113	1e-06	A:0.000001	G:0.000000
JU1581_II:11292203:G->A_0721	G	A	75816	61	C:19	T:25	0.002711	2e-06	C:0.000001	T:0.000001	64454	53	C:19	T:24	0.002778	2e-06	C:0.000001	T:0.000001
JU1581_V:18309531:C->T_0943	C	T	87237	62	A:22	G:4	0.00312	2e-06	A:0.000001	G:0.000000	74585	58	A:21	G:4	0.003215	2e-06	A:0.000001	G:0.000000
JU1581_X:15153830:C->T_1083	C	T	19081	14	A:3	G:1	0.000682	1e-06	A:0.000000	G:0.000000	17149	12	A:3	G:1	0.000739	1e-06	A:0.000000	G:0.000000
JU1652_I:8786203:C->G_0049	C	G	37707	876	A:4	T:4	0.001348	3.1e-05	A:0.000000	T:0.000000	33273	795	A:3	T:4	0.001434	3.4e-05	A:0.000000	T:0.000000
JU1652_IV:13210351:G->C_1309	G	C	62850	1751	A:9	T:17	0.002248	6.3e-05	A:0.000000	T:0.000001	54173	1556	A:9	T:17	0.002335	6.7e-05	A:0.000000	T:0.000001
JU1652_V:10767051:G->A_1404	G	A	68193	1848	C:3	T:16	0.002439	6.6e-05	C:0.000000	T:0.000001	58173	1647	C:3	T:16	0.002507	7.1e-05	C:0.000000	T:0.000001
JU1793_II:2945994:C->T_0041	C	T	47398	32	A:5	G:7	0.001695	1e-06	A:0.000000	G:0.000000	41553	30	A:5	G:7	0.001791	1e-06	A:0.000000	G:0.000000
JU1793_II:3806941:A->G_0047	A	G	76297	84	C:35	T:3	0.002728	3e-06	C:0.000001	T:0.000000	66010	81	C:34	T:3	0.002845	3e-06	C:0.000001	T:0.000000
JU1793_V:1692047:T->C_0236	T	C	24518	29	A:2	G:6	0.000877	1e-06	A:0.000000	G:0.000000	21762	24	A:2	G:5	0.000938	1e-06	A:0.000000	G:0.000000
JU1896_I:5502853:G->A_0065	G	A	85270	1674	C:10	T:16	0.003049	6e-05	C:0.000000	T:0.000001	72652	1514	C:9	T:16	0.003131	6.5e-05	C:0.000000	T:0.000001
JU1896_II:4600308:A->T_0489	A	T	20430	380	C:19	G:8	0.000731	1.4e-05	C:0.000001	G:0.000000	18103	354	C:19	G:8	0.00078	1.5e-05	C:0.000001	G:0.000000
JU1896_IV:13794865:A->G_0782	A	G	71695	1321	C:11	T:5	0.002564	4.7e-05	C:0.000000	T:0.000000	62233	1175	C:11	T:5	0.002682	5.1e-05	C:0.000000	T:0.000000
JU1896_V:10431734:T->C_0892	T	C	29235	20	A:1	G:11	0.001045	1e-06	A:0.000000	G:0.000000	25684	19	A:1	G:11	0.001107	1e-06	A:0.000000	G:0.000000
JU2001_I:14297638:A->T_0187	A	T	87433	30	C:21	G:35	0.003127	1e-06	C:0.000001	G:0.000001	74529	27	C:21	G:35	0.003212	1e-06	C:0.000001	G:0.000002
JU2001_II:308380:T->C_0291	T	C	137194	54	A:11	G:34	0.004906	2e-06	A:0.000000	G:0.000001	113957	51	A:11	G:34	0.004911	2e-06	A:0.000000	G:0.000001
JU2001_V:15526581:G->A_2950	G	A	39178	7	C:5	T:13	0.001401	0	C:0.000000	T:0.000000	33119	7	C:5	T:13	0.001427	0	C:0.000000	T:0.000001
JU2001_X:9040599:A->T_3337	A	T	85997	7	C:10	G:4	0.003075	0	C:0.000000	G:0.000000	73901	7	C:10	G:4	0.003185	0	C:0.000000	G:0.000000
JU2007_I:5430397:C->T_0248	C	T	67505	1863	A:9	G:7	0.002414	6.7e-05	A:0.000000	G:0.000000	58361	1700	A:9	G:7	0.002515	7.3e-05	A:0.000000	G:0.000000
JU2007_II:12372731:C->T_0541	C	T	68279	1680	A:6	G:3	0.002442	6e-05	A:0.000000	G:0.000000	59448	1542	A:6	G:3	0.002562	6.6e-05	A:0.000000	G:0.000000
JU2007_III:11370145:T->C_0695	T	C	60766	1892	A:2	G:15	0.002173	6.8e-05	A:0.000000	G:0.000001	52213	1688	A:2	G:15	0.00225	7.3e-05	A:0.000000	G:0.000001
JU2007_IV:1822603:G->C_0728	G	C	46567	1210	A:13	T:36	0.001665	4.3e-05	A:0.000000	T:0.000001	40942	1089	A:13	T:36	0.001765	4.7e-05	A:0.000001	T:0.000002
JU2017_I:13367225:T->C_0323	T	C	50088	1009	A:5	G:18	0.001791	3.6e-05	A:0.000000	G:0.000001	43554	917	A:5	G:18	0.001877	4e-05	A:0.000000	G:0.000001
JU2017_II:12879814:C->A_1173	C	A	67090	1607	G:3	T:10	0.002399	5.7e-05	G:0.000000	T:0.000000	57770	1453	G:3	T:10	0.00249	6.3e-05	G:0.000000	T:0.000000
JU2017_IV:2981713:A->G_1419	A	G	80326	169	C:92	T:78	0.002873	6e-06	C:0.000003	T:0.000003	64612	167	C:91	T:78	0.002785	7e-06	C:0.000004	T:0.000003
JU2017_V:1425052:C->G_2539	C	G	69268	1390	A:11	T:8	0.002477	5e-05	A:0.000000	T:0.000000	59283	1251	A:11	T:8	0.002555	5.4e-05	A:0.000000	T:0.000000
JU2106_II:10765509:T->C_0145	T	C	113266	203	A:10	G:17	0.004051	7e-06	A:0.000000	G:0.000001	94092	181	A:9	G:17	0.004055	8e-06	A:0.000000	G:0.000001
JU2106_IV:5547022:A->G_0289	A	G	89369	166	C:63	T:21	0.003196	6e-06	C:0.000002	T:0.000001	75803	151	C:62	T:21	0.003267	7e-06	C:0.000003	T:0.000001
JU2106_V:6225292:G->A_0411	G	A	92724	151	C:17	T:30	0.003316	5e-06	C:0.000001	T:0.000001	79513	133	C:17	T:30	0.003427	6e-06	C:0.000001	T:0.000001
JU2106_X:15664829:G->A_0594	G	A	85869	155	C:6	T:27	0.003071	6e-06	C:0.000000	T:0.000001	72666	143	C:6	T:27	0.003132	6e-06	C:0.000000	T:0.000001
JU2234_II:9013382:G->A_0205	G	A	98908	825	C:156	T:52	0.003537	3e-05	C:0.000006	T:0.000002	83935	742	C:155	T:52	0.003618	3.2e-05	C:0.000007	T:0.000002
JU2234_III:6140046:A->C_0341	A	C	36822	285	G:6	T:5	0.001317	1e-05	G:0.000000	T:0.000000	32156	262	G:6	T:5	0.001386	1.1e-05	G:0.000000	T:0.000000
JU2234_IV:12392257:G->A_0927	G	A	75637	803	C:13	T:23	0.002705	2.9e-05	C:0.000000	T:0.000001	65519	725	C:13	T:23	0.002824	3.1e-05	C:0.000001	T:0.000001
JU2234_V:10570139:A->C_1109	A	C	84147	940	G:57	T:32	0.003009	3.4e-05	G:0.000002	T:0.000001	72879	852	G:57	T:32	0.003141	3.7e-05	G:0.000002	T:0.000001
JU2316_I:3851925:C->A_0010	C	A	301108	391	G:27	T:55	0.010768	1.4e-05	G:0.000001	T:0.000002	228022	346	G:26	T:55	0.009828	1.5e-05	G:0.000001	T:0.000002
JU2316_II:11100616:G->A_0131	G	A	32730	203	C:5	T:6	0.00117	7e-06	C:0.000000	T:0.000000	28963	170	C:5	T:6	0.001248	7e-06	C:0.000000	T:0.000000
JU2316_IV:5088773:G->A_0290	G	A	96104	489	C:55	T:45	0.003437	1.7e-05	C:0.000002	T:0.000002	82251	441	C:54	T:45	0.003545	1.9e-05	C:0.000002	T:0.000002
JU2464_I:1598538:G->A_0017	G	A	80006	1405	C:50	T:26	0.002861	5e-05	C:0.000002	T:0.000001	68283	1285	C:49	T:26	0.002943	5.5e-05	C:0.000002	T:0.000001
JU2464_II:12957380:A->C_0289	A	C	104288	1992	G:18	T:5	0.003729	7.1e-05	G:0.000001	T:0.000000	87962	1799	G:18	T:5	0.003791	7.8e-05	G:0.000001	T:0.000000
JU2464_IV:13198821:G->A_0670	G	A	16325	438	C:0	T:2	0.000584	1.6e-05	C:0	T:0.000000	14571	400	C:0	T:2	0.000628	1.7e-05	C:0	T:0.000000
JU2464_X:12380030:T->C_1030	T	C	1	0	A:4	G:3	0	0	A:0.000000	G:0.000000	1	0	A:4	G:3	0	0	A:0.000000	G:0.000000
JU2519_II:4871040:T->G_0048	T	G	53134	622	A:2	C:9	0.0019	2.2e-05	A:0.000000	C:0.000000	46522	563	A:2	C:8	0.002005	2.4e-05	A:0.000000	C:0.000000
JU2519_III:2764480:T->A_0077	T	A	36384	9	C:17	G:10	0.001301	0	C:0.000001	G:0.000000	32418	9	C:17	G:10	0.001397	0	C:0.000001	G:0.000000
JU2519_IV:13333113:C->T_0115	C	T	70046	819	A:10	G:6	0.002505	2.9e-05	A:0.000000	G:0.000000	58615	734	A:10	G:6	0.002526	3.2e-05	A:0.000000	G:0.000000
JU2519_V:19665014:G->A_0204	G	A	63141	938	C:13	T:19	0.002258	3.4e-05	C:0.000000	T:0.000001	54317	847	C:13	T:19	0.002341	3.7e-05	C:0.000001	T:0.000001
JU2526_II:13167927:G->T_0162	G	T	57507	766	A:2	C:14	0.002057	2.7e-05	A:0.000000	C:0.000001	50194	699	A:2	C:14	0.002163	3e-05	A:0.000000	C:0.000001
JU2526_II:13240732:C->A_0163	C	A	68933	1078	G:7	T:6	0.002465	3.9e-05	G:0.000000	T:0.000000	59653	979	G:7	T:6	0.002571	4.2e-05	G:0.000000	T:0.000000
JU2526_IV:11940715:G->A_0354	G	A	80034	1079	C:5	T:17	0.002862	3.9e-05	C:0.000000	T:0.000001	69193	998	C:5	T:17	0.002982	4.3e-05	C:0.000000	T:0.000001
JU2526_IV:4688328:T->G_0289	T	G	67803	1151	A:22	C:18	0.002425	4.1e-05	A:0.000001	C:0.000001	58583	1033	A:22	C:18	0.002525	4.5e-05	A:0.000001	C:0.000001
JU2576_I:516916:G->T_0172	G	T	55189	98	A:5	C:4	0.001974	4e-06	A:0.000000	C:0.000000	48446	95	A:5	C:3	0.002088	4e-06	A:0.000000	C:0.000000
JU2576_II:756586:T->A_0471	T	A	16609	226	C:5	G:11	0.000594	8e-06	C:0.000000	G:0.000000	14961	220	C:5	G:11	0.000645	9e-06	C:0.000000	G:0.000000
JU2576_IV:7907569:T->A_0781	T	A	86849	92	C:21	G:30	0.003106	3e-06	C:0.000001	G:0.000001	74390	88	C:21	G:30	0.003206	4e-06	C:0.000001	G:0.000001
JU2576_V:779685:A->C_1089	A	C	81691	32	G:13	T:15	0.002921	1e-06	G:0.000000	T:0.000001	71379	32	G:13	T:14	0.003076	1e-06	G:0.000001	T:0.000001
JU258_I:3628582:A->G_0312	A	G	42207	1451	C:20	T:8	0.001509	5.2e-05	C:0.000001	T:0.000000	36351	1328	C:20	T:7	0.001567	5.7e-05	C:0.000001	T:0.000000
JU258_IV:652672:G->A_1698	G	A	70000	2920	C:30	T:39	0.002503	0.000104	C:0.000001	T:0.000001	60777	2611	C:30	T:38	0.002619	0.000113	C:0.000001	T:0.000002
JU258_V:17066639:C->G_2584	C	G	30467	1506	A:4	T:2	0.00109	5.4e-05	A:0.000000	T:0.000000	26923	1371	A:4	T:2	0.00116	5.9e-05	A:0.000000	T:0.000000
JU258_X:4359787:C->T_3220	C	T	23491	1171	A:1	G:0	0.00084	4.2e-05	A:0.000000	G:0	20877	1071	A:1	G:0	0.0009	4.6e-05	A:0.000000	G:0
JU2592_III:8886711:T->A_0192	T	A	92619	88	C:31	G:23	0.003312	3e-06	C:0.000001	G:0.000001	78756	83	C:30	G:23	0.003394	4e-06	C:0.000001	G:0.000001
JU2592_IV:729788:G->A_0217	G	A	81272	53	C:44	T:38	0.002906	2e-06	C:0.000002	T:0.000001	69667	48	C:44	T:38	0.003003	2e-06	C:0.000002	T:0.000002
JU2592_V:4412571:A->T_0335	A	T	52938	52	C:19	G:31	0.001893	2e-06	C:0.000001	G:0.000001	46432	48	C:19	G:30	0.002001	2e-06	C:0.000001	G:0.000001
JU2592_V:6989882:C->T_0522	C	T	102503	87	A:36	G:7	0.003666	3e-06	A:0.000001	G:0.000000	85164	77	A:29	G:7	0.00367	3e-06	A:0.000001	G:0.000000
JU2593_II:12072122:G->A_0087	G	A	61922	5322	C:11	T:8	0.002214	0.00019	C:0.000000	T:0.000000	53603	4830	C:10	T:8	0.00231	0.000208	C:0.000000	T:0.000000
JU2593_IV:8394352:T->A_0197	T	A	21516	856	C:9	G:11	0.000769	3.1e-05	C:0.000000	G:0.000000	19429	792	C:9	G:11	0.000837	3.4e-05	C:0.000000	G:0.000000
JU2593_V:10908195:A->T_0284	A	T	85495	5527	C:35	G:21	0.003057	0.000198	C:0.000001	G:0.000001	73146	4968	C:34	G:21	0.003153	0.000214	C:0.000001	G:0.000001
JU2593_X:9373342:G->A_0374	G	A	72099	4801	C:10	T:16	0.002578	0.000172	C:0.000000	T:0.000001	61649	4331	C:10	T:15	0.002657	0.000187	C:0.000000	T:0.000001
JU2619_I:3268769:G->T_0027	G	T	43684	75	A:11	C:19	0.001562	3e-06	A:0.000000	C:0.000001	37737	71	A:11	C:19	0.001626	3e-06	A:0.000000	C:0.000001
JU2619_II:4992898:G->A_1067	G	A	63112	62	C:7	T:15	0.002257	2e-06	C:0.000000	T:0.000001	55537	57	C:7	T:15	0.002394	2e-06	C:0.000000	T:0.000001
JU2619_III:1530223:G->A_1147	G	A	21917	34	C:2	T:6	0.000784	1e-06	C:0.000000	T:0.000000	19449	31	C:2	T:6	0.000838	1e-06	C:0.000000	T:0.000000
JU2619_V:11674237:C->T_1448	C	T	49406	52	A:10	G:17	0.001767	2e-06	A:0.000000	G:0.000001	42750	47	A:10	G:17	0.001842	2e-06	A:0.000000	G:0.000001
JU2811_II:736431:C->A_0044	C	A	103224	151	G:16	T:16	0.003691	5e-06	G:0.000001	T:0.000001	86604	140	G:16	T:15	0.003733	6e-06	G:0.000001	T:0.000001
JU2811_IV:16491929:G->A_1099	G	A	100105	109	C:13	T:37	0.00358	4e-06	C:0.000000	T:0.000001	84392	102	C:13	T:36	0.003637	4e-06	C:0.000001	T:0.000002
JU2811_V:16588101:A->G_2625	A	G	81166	34	C:56	T:17	0.002903	1e-06	C:0.000002	T:0.000001	69696	34	C:54	T:17	0.003004	1e-06	C:0.000002	T:0.000001
JU2811_X:10960240:T->A_2748	T	A	89671	114	C:35	G:23	0.003207	4e-06	C:0.000001	G:0.000001	76671	104	C:33	G:23	0.003304	4e-06	C:0.000001	G:0.000001
JU2829_I:2816753:G->A_0006	G	A	97174	864	C:140	T:185	0.003475	3.1e-05	C:0.000005	T:0.000007	80756	783	C:140	T:185	0.003481	3.4e-05	C:0.000006	T:0.000008
JU2829_II:11708519:A->G_0086	A	G	64960	628	C:47	T:16	0.002323	2.2e-05	C:0.000002	T:0.000001	55813	573	C:47	T:16	0.002405	2.5e-05	C:0.000002	T:0.000001
JU2829_III:7880361:T->C_0132	T	C	33766	13	A:5	G:8	0.001208	0	A:0.000000	G:0.000000	30032	13	A:5	G:8	0.001294	1e-06	A:0.000000	G:0.000000
JU2829_IV:10574711:C->T_0188	C	T	73776	502	A:16	G:19	0.002638	1.8e-05	A:0.000001	G:0.000001	62683	440	A:16	G:18	0.002702	1.9e-05	A:0.000001	G:0.000001
JU2838_I:6421:A->T_0001	A	T	31083	176	C:7	G:5	0.001112	6e-06	C:0.000000	G:0.000000	27822	164	C:7	G:5	0.001199	7e-06	C:0.000000	G:0.000000
JU2838_III:12688816:G->A_0999	G	A	24873	275	C:5	T:9	0.000889	1e-05	C:0.000000	T:0.000000	22081	255	C:5	T:9	0.000952	1.1e-05	C:0.000000	T:0.000000
JU2838_IV:16927896:A->T_1391	A	T	68288	443	C:69	G:28	0.002442	1.6e-05	C:0.000002	G:0.000001	59012	399	C:68	G:28	0.002543	1.7e-05	C:0.000003	G:0.000001
JU2838_V:8999057:A->C_1466	A	C	275023	11371	G:87	T:50	0.009835	0.000407	G:0.000003	T:0.000002	203285	10156	G:83	T:50	0.008761	0.000438	G:0.000004	T:0.000002
JU2841_II:13971639:C->T_0963	C	T	9676	152	A:1	G:3	0.000346	5e-06	A:0.000000	G:0.000000	8553	131	A:1	G:3	0.000369	6e-06	A:0.000000	G:0.000000
JU2841_III:11161992:T->C_1488	T	C	33513	668	A:20	G:15	0.001198	2.4e-05	A:0.000001	G:0.000001	29700	595	A:19	G:15	0.00128	2.6e-05	A:0.000001	G:0.000001
JU2841_V:8629430:G->A_2371	G	A	23103	318	C:2	T:6	0.000826	1.1e-05	C:0.000000	T:0.000000	20704	294	C:2	T:6	0.000892	1.3e-05	C:0.000000	T:0.000000
JU2841_X:15842559:A->G_2642	A	G	80590	1113	C:51	T:40	0.002882	4e-05	C:0.000002	T:0.000001	68506	988	C:51	T:40	0.002953	4.3e-05	C:0.000002	T:0.000002
JU2878_I:11925872:C->T_0511	C	T	66316	897	A:19	G:10	0.002372	3.2e-05	A:0.000001	G:0.000000	57706	816	A:17	G:10	0.002487	3.5e-05	A:0.000001	G:0.000000
JU2878_II:2250295:C->T_0729	C	T	2575	0	A:0	G:1	9.2e-05	0	A:0	G:0.000000	2362	0	A:0	G:1	0.000102	0	A:0	G:0.000000
JU2878_III:12666999:A->G_1095	A	G	2342	34	C:1	T:1	8.4e-05	1e-06	C:0.000000	T:0.000000	2095	26	C:1	T:1	9e-05	1e-06	C:0.000000	T:0.000000
JU2878_V:175914:C->A_1628	C	A	4827	74	G:0	T:0	0.000173	3e-06	G:0	T:0	4341	67	G:0	T:0	0.000187	3e-06	G:0	T:0
JU2879_I:7951960:G->A_0080	G	A	59148	199	C:15	T:13	0.002115	7e-06	C:0.000001	T:0.000000	51695	180	C:15	T:13	0.002228	8e-06	C:0.000001	T:0.000001
JU2879_II:6620354:G->A_0258	G	A	74210	263	C:19	T:35	0.002654	9e-06	C:0.000001	T:0.000001	63277	233	C:19	T:35	0.002727	1e-05	C:0.000001	T:0.000002
JU2879_III:12810613:G->T_0511	G	T	67211	217	A:1	C:7	0.002404	8e-06	A:0.000000	C:0.000000	58244	201	A:1	C:7	0.00251	9e-06	A:0.000000	C:0.000000
JU2879_V:3349200:G->A_0703	G	A	44631	26	C:23	T:21	0.001596	1e-06	C:0.000001	T:0.000001	37991	23	C:21	T:21	0.001637	1e-06	C:0.000001	T:0.000001
JU3137_I:926958:G->A_0007	G	A	34986	409	C:8	T:5	0.001251	1.5e-05	C:0.000000	T:0.000000	31025	377	C:8	T:5	0.001337	1.6e-05	C:0.000000	T:0.000000
JU3137_II:4312381:T->C_0164	T	C	6407	389	A:0	G:0	0.000229	1.4e-05	A:0	G:0	5733	342	A:0	G:0	0.000247	1.5e-05	A:0	G:0
JU3137_IV:11788808:A->C_0676	A	C	100317	1258	G:19	T:6	0.003587	4.5e-05	G:0.000001	T:0.000000	83644	1121	G:19	T:6	0.003605	4.8e-05	G:0.000001	T:0.000000
JU3137_V:7226702:G->A_0831	G	A	82698	1104	C:10	T:14	0.002957	3.9e-05	C:0.000000	T:0.000001	69801	986	C:9	T:14	0.003008	4.2e-05	C:0.000000	T:0.000001
JU561_I:8259121:C->T_0045	C	T	50897	3	A:19	G:19	0.00182	0	A:0.000001	G:0.000001	44852	3	A:19	G:19	0.001933	0	A:0.000001	G:0.000001
JU561_III:7999832:G->A_0248	G	A	63623	2	C:7	T:15	0.002275	0	C:0.000000	T:0.000001	55520	2	C:7	T:15	0.002393	0	C:0.000000	T:0.000001
JU561_IV:7559511:G->A_0348	G	A	89503	0	C:11	T:21	0.003201	0	C:0.000000	T:0.000001	71688	0	C:10	T:21	0.00309	0	C:0.000000	T:0.000001
JU561_X:17631003:C->T_0627	C	T	43052	7	A:6	G:2	0.00154	0	A:0.000000	G:0.000000	37546	7	A:6	G:2	0.001618	0	A:0.000000	G:0.000000
JU774_II:2390215:T->A_0137	T	A	32031	480	C:5	G:8	0.001145	1.7e-05	C:0.000000	G:0.000000	28408	427	C:4	G:8	0.001224	1.8e-05	C:0.000000	G:0.000000
JU774_III:6970441:G->T_0272	G	T	81458	407	A:24	C:87265	0.002913	1.5e-05	A:0.000001	C:0.003121	70107	374	A:24	C:74910	0.003022	1.6e-05	A:0.000001	C:0.003229
JU774_IV:7090536:C->T_0393	C	T	74316	336	A:11	G:3	0.002658	1.2e-05	A:0.000000	G:0.000000	64712	304	A:11	G:3	0.002789	1.3e-05	A:0.000000	G:0.000000
JU774_V:12647774:C->T_0618	C	T	80304	344	A:11	G:5	0.002872	1.2e-05	A:0.000000	G:0.000000	68208	305	A:10	G:5	0.00294	1.3e-05	A:0.000000	G:0.000000
JU775_II:12829294:T->C_0060	T	C	95576	135	A:43	G:39	0.003418	5e-06	A:0.000002	G:0.000001	80863	135	A:43	G:39	0.003485	6e-06	A:0.000002	G:0.000002
JU775_III:6003176:G->T_0093	G	T	78443	40	A:17	C:39	0.002805	1e-06	A:0.000001	C:0.000001	62879	40	A:17	C:38	0.00271	2e-06	A:0.000001	C:0.000002
JU775_IV:11996296:A->T_0168	A	T	29134	4	C:4	G:6	0.001042	0	C:0.000000	G:0.000000	25983	4	C:4	G:6	0.00112	0	C:0.000000	G:0.000000
JU775_X:14768501:G->A_0257	G	A	88806	9	C:8	T:27	0.003176	0	C:0.000000	T:0.000001	73942	9	C:8	T:25	0.003187	0	C:0.000000	T:0.000001
JU782_II:9260290:G->A_0071	G	A	24254	61	C:3	T:9	0.000867	2e-06	C:0.000000	T:0.000000	21511	57	C:3	T:9	0.000927	2e-06	C:0.000000	T:0.000000
JU782_III:10628882:G->A_0153	G	A	82355	206	C:7	T:14	0.002945	7e-06	C:0.000000	T:0.000001	70726	192	C:7	T:14	0.003048	8e-06	C:0.000000	T:0.000001
JU782_III:8881243:C->T_0148	C	T	106396	285	A:15	G:9	0.003805	1e-05	A:0.000001	G:0.000000	89062	259	A:14	G:9	0.003838	1.1e-05	A:0.000001	G:0.000000
JU782_V:781340:G->A_0221	G	A	30060	106	C:2	T:6	0.001075	4e-06	C:0.000000	T:0.000000	26507	98	C:2	T:6	0.001142	4e-06	C:0.000000	T:0.000000
KR314_I:13876048:A->G_0207	A	G	84377	1276	C:17	T:8	0.003017	4.6e-05	C:0.000001	T:0.000000	71434	1131	C:16	T:8	0.003079	4.9e-05	C:0.000001	T:0.000000
KR314_II:9695138:G->A_0499	G	A	77353	1175	C:4	T:20	0.002766	4.2e-05	C:0.000000	T:0.000001	66554	1063	C:4	T:20	0.002868	4.6e-05	C:0.000000	T:0.000001
KR314_IV:1816421:A->G_0840	A	G	59742	27	C:46	T:13	0.002136	1e-06	C:0.000002	T:0.000000	52203	27	C:46	T:13	0.00225	1e-06	C:0.000002	T:0.000001
KR314_X:16497991:C->G_1311	C	G	78213	1101	A:28	T:9	0.002797	3.9e-05	A:0.000001	T:0.000000	67109	988	A:27	T:9	0.002892	4.3e-05	A:0.000001	T:0.000000
LKC34_II:3120049:A->G_0172	A	G	78186	641	C:56	T:38	0.002796	2.3e-05	C:0.000002	T:0.000001	63318	593	C:56	T:38	0.002729	2.6e-05	C:0.000002	T:0.000002
LKC34_III:9930207:C->T_0699	C	T	86407	824	A:11	G:5	0.00309	2.9e-05	A:0.000000	G:0.000000	72265	748	A:11	G:5	0.003115	3.2e-05	A:0.000000	G:0.000000
LKC34_IV:16717503:T->C_0926	T	C	33927	360	A:2	G:15	0.001213	1.3e-05	A:0.000000	G:0.000001	29556	323	A:2	G:15	0.001274	1.4e-05	A:0.000000	G:0.000001
LKC34_X:9974623:C->T_1226	C	T	53186	415	A:9	G:6	0.001902	1.5e-05	A:0.000000	G:0.000000	46348	382	A:9	G:6	0.001998	1.6e-05	A:0.000000	G:0.000000
MY10_I:2148947:G->A_0126	G	A	94180	1574	C:16	T:18	0.003368	5.6e-05	C:0.000001	T:0.000001	78291	1411	C:16	T:18	0.003374	6.1e-05	C:0.000001	T:0.000001
MY10_II:2879299:C->T_2231	C	T	57356	1307	A:10	G:1	0.002051	4.7e-05	A:0.000000	G:0.000000	49804	1187	A:10	G:1	0.002147	5.1e-05	A:0.000000	G:0.000000
MY10_IV:4179751:G->A_2677	G	A	37421	766	C:4	T:5	0.001338	2.7e-05	C:0.000000	T:0.000000	33135	680	C:4	T:5	0.001428	2.9e-05	C:0.000000	T:0.000000
MY10_X:5146613:G->T_3235	G	T	56481	935	A:7	C:8	0.00202	3.3e-05	A:0.000000	C:0.000000	49333	846	A:7	C:8	0.002126	3.6e-05	A:0.000000	C:0.000000
MY16_II:1895575:A->G_0061	A	G	12120	52	C:11	T:4	0.000433	2e-06	C:0.000000	T:0.000000	10965	51	C:11	T:4	0.000473	2e-06	C:0.000000	T:0.000000
MY16_V:13037037:A->T_0241	A	T	11336	474	C:1	G:4	0.000405	1.7e-05	C:0.000000	G:0.000000	10070	426	C:1	G:4	0.000434	1.8e-05	C:0.000000	G:0.000000
MY16_V:19311433:G->T_0296	G	T	9345	0	A:0	C:2	0.000334	0	A:0	C:0.000000	8351	0	A:0	C:2	0.00036	0	A:0	C:0.000000
MY16_V:20214591:G->A_0329	G	A	33611	3	C:12	T:8	0.001202	0	C:0.000000	T:0.000000	29785	3	C:12	T:8	0.001284	0	C:0.000001	T:0.000000
MY18_I:1222705:A->T_0006	A	T	87413	2049	C:19	G:27	0.003126	7.3e-05	C:0.000001	G:0.000001	72499	1866	C:18	G:27	0.003125	8e-05	C:0.000001	G:0.000001
MY18_II:1787275:A->G_0044	A	G	11445	8	C:4	T:5	0.000409	0	C:0.000000	T:0.000000	10230	8	C:4	T:5	0.000441	0	C:0.000000	T:0.000000
MY18_II:2428802:A->G_0046	A	G	5467	10711	C:396	T:6373	0.000196	0.000383	C:0.000014	T:0.000228	4863	9102	C:345	T:5381	0.00021	0.000392	C:0.000015	T:0.000232
MY18_II:2622330:A->C_0049	A	C	62508	55	G:47	T:5	0.002235	2e-06	G:0.000002	T:0.000000	51597	48	G:47	T:5	0.002224	2e-06	G:0.000002	T:0.000000
MY2147_I:7395710:G->A_0058	G	A	89618	29	C:14	T:26	0.003205	1e-06	C:0.000001	T:0.000001	76854	27	C:14	T:25	0.003312	1e-06	C:0.000001	T:0.000001
MY2147_II:7858153:A->G_0136	A	G	106368	46	C:38	T:22	0.003804	2e-06	C:0.000001	T:0.000001	90826	43	C:38	T:20	0.003915	2e-06	C:0.000002	T:0.000001
MY2147_IV:8817919:A->T_0350	A	T	106879	58	C:63	G:39	0.003822	2e-06	C:0.000002	G:0.000001	89613	56	C:63	G:38	0.003862	2e-06	C:0.000003	G:0.000002
MY2147_V:20500817:C->T_0825	C	T	47594	20	A:10	G:2	0.001702	1e-06	A:0.000000	G:0.000000	42336	19	A:9	G:2	0.001825	1e-06	A:0.000000	G:0.000000
MY23_I:2830426:G->A_0275	G	A	48634	111	C:9	T:6	0.001739	4e-06	C:0.000000	T:0.000000	42457	99	C:9	T:6	0.00183	4e-06	C:0.000000	T:0.000000
MY23_III:6291822:A->T_1070	A	T	34458	110	C:5	G:7	0.001232	4e-06	C:0.000000	G:0.000000	31573	101	C:5	G:7	0.001361	4e-06	C:0.000000	G:0.000000
MY23_V:20322393:G->A_1540	G	A	32931	2	C:14	T:13	0.001178	0	C:0.000001	T:0.000000	28374	2	C:14	T:12	0.001223	0	C:0.000001	T:0.000001
MY2453_I:1768407:A->T_0018	A	T	32793	42	C:44	G:56	0.001173	2e-06	C:0.000002	G:0.000002	29028	42	C:44	G:56	0.001251	2e-06	C:0.000002	G:0.000002
MY2453_II:681909:A->G_0119	A	G	25041	16	C:5	T:72	0.000895	1e-06	C:0.000000	T:0.000003	22396	14	C:5	T:65	0.000965	1e-06	C:0.000000	T:0.000003
MY2453_III:1068285:A->G_0364	A	G	62802	5	C:19	T:4	0.002246	0	C:0.000001	T:0.000000	54329	5	C:17	T:4	0.002342	0	C:0.000001	T:0.000000
MY2453_X:6949735:G->A_0822	G	A	85907	57	C:56	T:33	0.003072	2e-06	C:0.000002	T:0.000001	73012	56	C:53	T:33	0.003147	2e-06	C:0.000002	T:0.000001
MY2741_I:1388481:C->A_0002	C	A	8805	28	G:9	T:24	0.000315	1e-06	G:0.000000	T:0.000001	7765	25	G:9	T:24	0.000335	1e-06	G:0.000000	T:0.000001
MY2741_II:3362289:G->A_0067	G	A	50460	0	C:4	T:10	0.001804	0	C:0.000000	T:0.000000	43803	0	C:4	T:10	0.001888	0	C:0.000000	T:0.000000
MY2741_V:11214926:A->G_0175	A	G	48742	52	C:54	T:40	0.001743	2e-06	C:0.000002	T:0.000001	42690	51	C:54	T:40	0.00184	2e-06	C:0.000002	T:0.000002
MY2741_X:12245473:C->T_0220	C	T	71295	31	A:14	G:5	0.00255	1e-06	A:0.000001	G:0.000000	61710	30	A:14	G:5	0.00266	1e-06	A:0.000001	G:0.000000
N2_I:12042548:G->C_0004	G	C	2150	51403	A:1357	T:1585	7.7e-05	0.001838	A:0.000049	T:0.000057	1506	44013	A:936	T:934	6.5e-05	0.001897	A:0.000040	T:0.000040
N2_III:2770134:T->G_0007	T	G	6031	1614	A:33	C:32	0.000216	5.8e-05	A:0.000001	C:0.000001	5631	1576	A:33	C:32	0.000243	6.8e-05	A:0.000001	C:0.000001
N2_III:7447025:C->G_0007	C	G	375728	72153	A:2737	T:2696	0.013436	0.00258	A:0.000098	T:0.000096	231372	57326	A:2355	T:2325	0.009972	0.002471	A:0.000101	T:0.000100
N2_V:12775675:A->T_0012	A	T	44	14450	C:15	G:12	2e-06	0.000517	C:0.000001	G:0.000000	39	8014	C:13	G:12	2e-06	0.000345	C:0.000001	G:0.000001
NIC195_I:9787695:T->C_0093	T	C	34025	62	A:1	G:7	0.001217	2e-06	A:0.000000	G:0.000000	30085	60	A:1	G:7	0.001297	3e-06	A:0.000000	G:0.000000
NIC195_IV:2651378:G->T_0593	G	T	68138	92	A:4	C:17	0.002437	3e-06	A:0.000000	C:0.000001	58974	86	A:4	C:16	0.002542	4e-06	A:0.000000	C:0.000001
NIC195_V:1868780:G->A_0746	G	A	53955	69	C:4	T:11	0.001929	2e-06	C:0.000000	T:0.000000	46908	62	C:4	T:11	0.002022	3e-06	C:0.000000	T:0.000000
NIC199_I:849042:T->A_0006	T	A	23316	227	C:6	G:26	0.000834	8e-06	C:0.000000	G:0.000001	20692	211	C:6	G:26	0.000892	9e-06	C:0.000000	G:0.000001
NIC199_II:14732413:C->T_0217	C	T	46310	496	A:11	G:3	0.001656	1.8e-05	A:0.000000	G:0.000000	40679	455	A:11	G:3	0.001753	2e-05	A:0.000000	G:0.000000
NIC199_III:3799559:A->T_0280	A	T	82156	922	C:17	G:78	0.002938	3.3e-05	C:0.000001	G:0.000003	70868	860	C:17	G:74	0.003054	3.7e-05	C:0.000001	G:0.000003
NIC199_IV:49034:A->C_0379	A	C	84611	910	G:21	T:7	0.003026	3.3e-05	G:0.000001	T:0.000000	71728	823	G:21	T:7	0.003091	3.5e-05	G:0.000001	T:0.000000
NIC251_II:11260257:A->G_1138	A	G	84144	217	C:67	T:36	0.003009	8e-06	C:0.000002	T:0.000001	72085	205	C:67	T:36	0.003107	9e-06	C:0.000003	T:0.000002
NIC251_III:11187641:A->T_1453	A	T	87825	104	C:12	G:13	0.003141	4e-06	C:0.000000	G:0.000000	75629	95	C:12	G:13	0.00326	4e-06	C:0.000001	G:0.000001
NIC251_V:7051301:G->T_2385	G	T	65678	103	A:9	C:12	0.002349	4e-06	A:0.000000	C:0.000000	57462	96	A:9	C:11	0.002477	4e-06	A:0.000000	C:0.000000
NIC251_X:12457598:G->A_3782	G	A	83021	1525	C:1379	T:1591	0.002969	5.5e-05	C:0.000049	T:0.000057	69957	1512	C:1374	T:1587	0.003015	6.5e-05	C:0.000059	T:0.000068
NIC252_I:11562711:A->G_0313	A	G	49612	689	C:68	T:295	0.001774	2.5e-05	C:0.000002	T:0.000011	43314	629	C:61	T:270	0.001867	2.7e-05	C:0.000003	T:0.000012
NIC252_II:12805383:C->A_1095	C	A	47787	719	G:7	T:11	0.001709	2.6e-05	G:0.000000	T:0.000000	42360	659	G:7	T:10	0.001826	2.8e-05	G:0.000000	T:0.000000
NIC252_III:11662725:A->T_1204	A	T	28516	421	C:12	G:5	0.00102	1.5e-05	C:0.000000	G:0.000000	25289	374	C:12	G:5	0.00109	1.6e-05	C:0.000001	G:0.000000
NIC252_IV:11069611:C->T_1322	C	T	61755	969	A:19	G:4	0.002208	3.5e-05	A:0.000001	G:0.000000	53509	868	A:16	G:4	0.002306	3.7e-05	A:0.000001	G:0.000000
NIC256_II:14311740:A->G_0076	A	G	56557	11	C:13	T:4	0.002023	0	C:0.000000	T:0.000000	48985	11	C:13	T:4	0.002111	0	C:0.000001	T:0.000000
NIC256_II:910005:G->A_0039	G	A	73626	801	C:31	T:23	0.002633	2.9e-05	C:0.000001	T:0.000001	63837	721	C:29	T:23	0.002751	3.1e-05	C:0.000001	T:0.000001
NIC256_III:617398:G->A_0082	G	A	26109	1	C:0	T:8	0.000934	0	C:0	T:0.000000	23142	1	C:0	T:8	0.000997	0	C:0	T:0.000000
NIC256_X:10575306:G->A_0205	G	A	74623	8	C:11	T:4	0.002669	0	C:0.000000	T:0.000000	64209	8	C:11	T:4	0.002767	0	C:0.000000	T:0.000000
NIC258_II:1729029:G->A_0091	G	A	107880	5224	C:22	T:33	0.003858	0.000187	C:0.000001	T:0.000001	89953	4592	C:22	T:33	0.003877	0.000198	C:0.000001	T:0.000001
NIC258_IV:8734202:A->T_0229	A	T	91788	3056	C:23	G:16	0.003282	0.000109	C:0.000001	G:0.000001	78003	2742	C:23	G:15	0.003362	0.000118	C:0.000001	G:0.000001
NIC258_V:11639247:G->A_0322	G	A	56791	2917	C:20	T:40	0.002031	0.000104	C:0.000001	T:0.000001	49567	2779	C:20	T:40	0.002136	0.00012	C:0.000001	T:0.000002
NIC260_II:12935467:A->T_0102	A	T	10283	39477	C:8	G:14	0.000368	0.001412	C:0.000000	G:0.000001	9312	35050	C:7	G:14	0.000401	0.001511	C:0.000000	G:0.000001
NIC260_IV:3955433:A->G_0189	A	G	54357	1293	C:44	T:20	0.001944	4.6e-05	C:0.000002	T:0.000001	47405	1169	C:44	T:20	0.002043	5e-05	C:0.000002	T:0.000001
NIC260_V:4630618:A->G_0253	A	G	95003	2325	C:82	T:32	0.003397	8.3e-05	C:0.000003	T:0.000001	80107	2110	C:82	T:32	0.003453	9.1e-05	C:0.000004	T:0.000001
NIC260_X:6160622:C->G_0381	C	G	104536	12916	A:34	T:32	0.003738	0.000462	A:0.000001	T:0.000001	87819	11469	A:31	T:31	0.003785	0.000494	A:0.000001	T:0.000001
NIC261_II:14640296:T->C_0101	T	C	19336	11	A:7	G:8	0.000691	0	A:0.000000	G:0.000000	17280	11	A:7	G:8	0.000745	0	A:0.000000	G:0.000000
NIC261_V:19431092:T->C_0303	T	C	140882	12866	A:18	G:21	0.005038	0.00046	A:0.000001	G:0.000001	116681	11504	A:18	G:21	0.005029	0.000496	A:0.000001	G:0.000001
NIC261_X:4756862:G->C_0339	G	C	77915	9177	A:12	T:34	0.002786	0.000328	A:0.000000	T:0.000001	67532	8246	A:12	T:34	0.002911	0.000355	A:0.000001	T:0.000001
NIC261_X:6698363:C->T_0352	C	T	74316	1848	A:8	G:4	0.002658	6.6e-05	A:0.000000	G:0.000000	63936	1693	A:7	G:4	0.002756	7.3e-05	A:0.000000	G:0.000000
NIC262_I:13467502:T->A_0073	T	A	118087	645	C:30	G:34	0.004223	2.3e-05	C:0.000001	G:0.000001	98157	582	C:30	G:34	0.00423	2.5e-05	C:0.000001	G:0.000001
NIC262_III:12674518:A->G_0306	A	G	74705	531	C:160	T:81	0.002672	1.9e-05	C:0.000006	T:0.000003	64533	482	C:160	T:80	0.002781	2.1e-05	C:0.000007	T:0.000003
NIC262_V:1331964:A->T_0421	A	T	30187	17	C:19	G:26	0.00108	1e-06	C:0.000001	G:0.000001	26932	17	C:19	G:26	0.001161	1e-06	C:0.000001	G:0.000001
NIC262_X:7728993:G->A_0578	G	A	82475	500	C:10	T:33	0.002949	1.8e-05	C:0.000000	T:0.000001	69962	440	C:10	T:33	0.003015	1.9e-05	C:0.000000	T:0.000001
NIC265_I:2798111:G->A_0034	G	A	71010	96	C:22	T:28	0.002539	3e-06	C:0.000001	T:0.000001	61307	92	C:21	T:27	0.002642	4e-06	C:0.000001	T:0.000001
NIC265_III:4655272:A->T_0908	A	T	37947	79	C:33	G:25	0.001357	3e-06	C:0.000001	G:0.000001	33318	74	C:33	G:25	0.001436	3e-06	C:0.000001	G:0.000001
NIC265_IV:9592319:T->C_1022	T	C	73970	120	A:3	G:28	0.002645	4e-06	A:0.000000	G:0.000001	63586	107	A:3	G:28	0.00274	5e-06	A:0.000000	G:0.000001
NIC265_V:18883251:C->A_1202	C	A	736055	373995	G:74069	T:1902	0.026322	0.013374	G:0.002649	T:0.000068	440196	262118	G:61101	T:1685	0.018972	0.011297	G:0.002633	T:0.000073
NIC266_I:1355756:G->A_0019	G	A	2265	773	C:1	T:1	8.1e-05	2.8e-05	C:0.000000	T:0.000000	2037	699	C:1	T:1	8.8e-05	3e-05	C:0.000000	T:0.000000
NIC266_III:6805834:G->A_0403	G	A	18973	13	C:4	T:9	0.000678	0	C:0.000000	T:0.000000	16758	11	C:4	T:9	0.000722	0	C:0.000000	T:0.000000
NIC266_V:5816119:A->G_0572	A	G	40852	31	C:30	T:18	0.001461	1e-06	C:0.000001	T:0.000001	35950	31	C:30	T:18	0.001549	1e-06	C:0.000001	T:0.000001
NIC266_X:1837854:T->G_0687	T	G	60982	48	A:4	C:10	0.002181	2e-06	A:0.000000	C:0.000000	52296	43	A:4	C:10	0.002254	2e-06	A:0.000000	C:0.000000
NIC268_I:3173368:G->T_0310	G	T	84859	42	A:6	C:10	0.003035	2e-06	A:0.000000	C:0.000000	72132	42	A:6	C:10	0.003109	2e-06	A:0.000000	C:0.000000
NIC268_III:981275:G->T_1672	G	T	10944	24	A:0	C:1	0.000391	1e-06	A:0	C:0.000000	9813	24	A:0	C:1	0.000423	1e-06	A:0	C:0.000000
NIC268_IV:2243367:G->A_2925	G	A	91630	36	C:16	T:25	0.003277	1e-06	C:0.000001	T:0.000001	76844	36	C:15	T:25	0.003312	2e-06	C:0.000001	T:0.000001
NIC268_V:16272328:A->G_6101	A	G	76433	208	C:87	T:52	0.002733	7e-06	C:0.000003	T:0.000002	65809	203	C:85	T:52	0.002836	9e-06	C:0.000004	T:0.000002
NIC271_II:2168874:T->G_0096	T	G	89786	775	A:9	C:37	0.003211	2.8e-05	A:0.000000	C:0.000001	75111	667	A:9	C:37	0.003237	2.9e-05	A:0.000000	C:0.000002
NIC271_IV:1057576:G->T_0177	G	T	43755	2382	A:3	C:1	0.001565	8.5e-05	A:0.000000	C:0.000000	38904	2181	A:3	C:1	0.001677	9.4e-05	A:0.000000	C:0.000000
NIC271_V:15537258:A->T_0278	A	T	84364	9591	C:17	G:8	0.003017	0.000343	C:0.000001	G:0.000000	72318	8629	C:17	G:8	0.003117	0.000372	C:0.000001	G:0.000000
NIC271_X:11104026:T->C_0355	T	C	42034	1724	A:2	G:7	0.001503	6.2e-05	A:0.000000	G:0.000000	36945	1542	A:2	G:7	0.001592	6.6e-05	A:0.000000	G:0.000000
NIC3_I:10683375:G->A_0071	G	A	48476	66	C:5	T:24	0.001734	2e-06	C:0.000000	T:0.000001	42324	59	C:5	T:24	0.001824	3e-06	C:0.000000	T:0.000001
NIC3_II:4040840:T->C_0649	T	C	57764	47	A:3	G:29	0.002066	2e-06	A:0.000000	G:0.000001	50701	45	A:3	G:29	0.002185	2e-06	A:0.000000	G:0.000001
NIC3_III:4243615:A->G_0884	A	G	9074	6	C:3	T:3	0.000324	0	C:0.000000	T:0.000000	8135	6	C:3	T:3	0.000351	0	C:0.000000	T:0.000000
NIC3_IV:7130827:G->A_1075	G	A	28986	24	C:2	T:9	0.001037	1e-06	C:0.000000	T:0.000000	25580	22	C:2	T:9	0.001102	1e-06	C:0.000000	T:0.000000
NIC501_I:996739:G->A_0013	G	A	23721	979	C:14	T:8	0.000848	3.5e-05	C:0.000001	T:0.000000	20991	881	C:14	T:8	0.000905	3.8e-05	C:0.000001	T:0.000000
NIC501_II:771763:C->T_0067	C	T	83217	1933	A:33	G:2	0.002976	6.9e-05	A:0.000001	G:0.000000	70998	1754	A:28	G:2	0.00306	7.6e-05	A:0.000001	G:0.000000
NIC501_IV:5751338:G->T_0240	G	T	89341	2279	A:12	C:26	0.003195	8.1e-05	A:0.000000	C:0.000001	74016	2034	A:12	C:26	0.00319	8.8e-05	A:0.000001	C:0.000001
NIC501_V:7186913:T->A_0640	T	A	35056	824	C:5	G:7	0.001254	2.9e-05	C:0.000000	G:0.000000	31297	760	C:5	G:7	0.001349	3.3e-05	C:0.000000	G:0.000000
NIC523_I:9329936:G->A_0079	G	A	84658	858	C:11	T:20	0.003027	3.1e-05	C:0.000000	T:0.000001	72416	786	C:11	T:19	0.003121	3.4e-05	C:0.000000	T:0.000001
NIC523_III:6373316:C->T_0465	C	T	62105	595	A:15	G:5	0.002221	2.1e-05	A:0.000001	G:0.000000	53522	532	A:15	G:5	0.002307	2.3e-05	A:0.000001	G:0.000000
NIC523_IV:1672445:A->T_0546	A	T	74631	780	C:17	G:9	0.002669	2.8e-05	C:0.000001	G:0.000000	63097	700	C:17	G:9	0.002719	3e-05	C:0.000001	G:0.000000
NIC526_I:10925254:T->A_0094	T	A	28254	176	C:6	G:14	0.00101	6e-06	C:0.000000	G:0.000001	25161	157	C:6	G:14	0.001084	7e-06	C:0.000000	G:0.000001
NIC526_III:6091436:G->A_0324	G	A	83952	668	C:10	T:13	0.003002	2.4e-05	C:0.000000	T:0.000000	70879	588	C:10	T:13	0.003055	2.5e-05	C:0.000000	T:0.000001
NIC526_IV:4015508:C->T_0953	C	T	77624	590	A:7	G:4	0.002776	2.1e-05	A:0.000000	G:0.000000	66657	526	A:7	G:4	0.002873	2.3e-05	A:0.000000	G:0.000000
NIC526_V:15578221:C->A_1167	C	A	101345	56648	G:32	T:38	0.003624	0.002026	G:0.000001	T:0.000001	85902	49625	G:31	T:38	0.003702	0.002139	G:0.000001	T:0.000002
NIC527_I:1958596:G->T_0060	G	T	68525	1894	A:12	C:17	0.002451	6.8e-05	A:0.000000	C:0.000001	59198	1714	A:12	C:17	0.002551	7.4e-05	A:0.000001	C:0.000001
NIC527_II:15130732:G->A_0346	G	A	58680	1649	C:15	T:11	0.002098	5.9e-05	C:0.000001	T:0.000000	51254	1506	C:15	T:11	0.002209	6.5e-05	C:0.000001	T:0.000000
NIC527_III:12663742:A->G_0503	A	G	106833	2249	C:163	T:138	0.00382	8e-05	C:0.000006	T:0.000005	89675	2035	C:163	T:138	0.003865	8.8e-05	C:0.000007	T:0.000006
NIC527_X:13209174:A->G_0927	A	G	53740	1391	C:7	T:4	0.001922	5e-05	C:0.000000	T:0.000000	48493	1287	C:7	T:4	0.00209	5.5e-05	C:0.000000	T:0.000000
NIC528_I:2704295:G->A_0039	G	A	36854	313	C:13	T:15	0.001318	1.1e-05	C:0.000000	T:0.000001	32172	300	C:13	T:15	0.001387	1.3e-05	C:0.000001	T:0.000001
NIC528_II:3724861:A->T_0162	A	T	11414	6	C:1	G:6	0.000408	0	C:0.000000	G:0.000000	10204	6	C:1	G:6	0.00044	0	C:0.000000	G:0.000000
NIC528_III:12090503:A->T_0412	A	T	55394	197	C:66	G:105	0.001981	7e-06	C:0.000002	G:0.000004	47433	183	C:66	G:105	0.002044	8e-06	C:0.000003	G:0.000005
NIC528_IV:875241:A->T_0433	A	T	107129	359	C:62	G:62	0.003831	1.3e-05	C:0.000002	G:0.000002	89659	331	C:62	G:62	0.003864	1.4e-05	C:0.000003	G:0.000003
PB306_I:12851348:G->C_0291	G	C	107907	23	A:21	T:32	0.003859	1e-06	A:0.000001	T:0.000001	89006	23	A:20	T:32	0.003836	1e-06	A:0.000001	T:0.000001
PB306_III:728665:T->A_0392	T	A	50530	11503	C:12	G:18	0.001807	0.000411	C:0.000000	G:0.000001	44425	10595	C:12	G:16	0.001915	0.000457	C:0.000001	G:0.000001
PB306_V:215642:T->A_0783	T	A	55498	16	C:15	G:34	0.001985	1e-06	C:0.000001	G:0.000001	47904	13	C:15	G:34	0.002065	1e-06	C:0.000001	G:0.000001
PB306_X:7292254:G->A_3184	G	A	62733	9	C:15	T:13	0.002243	0	C:0.000001	T:0.000000	54134	9	C:15	T:13	0.002333	0	C:0.000001	T:0.000001
PS2025_I:5273967:C->T_0025	C	T	85684	1114	A:9	G:4	0.003064	4e-05	A:0.000000	G:0.000000	73495	1014	A:8	G:4	0.003168	4.4e-05	A:0.000000	G:0.000000
PS2025_II:14240702:A->T_0102	A	T	115405	1418	C:42	G:16	0.004127	5.1e-05	C:0.000002	G:0.000001	97055	1278	C:42	G:16	0.004183	5.5e-05	C:0.000002	G:0.000001
PS2025_V:470556:C->T_0189	C	T	30749	5	A:5	G:1	0.0011	0	A:0.000000	G:0.000000	27064	5	A:5	G:1	0.001166	0	A:0.000000	G:0.000000
PS2025_X:3374865:G->A_0334	G	A	63825	862	C:34	T:28	0.002282	3.1e-05	C:0.000001	T:0.000001	55355	771	C:34	T:28	0.002386	3.3e-05	C:0.000001	T:0.000001
QG2075_II:13023115:C->T_0341	C	T	68175	475	A:19	G:4	0.002438	1.7e-05	A:0.000001	G:0.000000	59581	433	A:18	G:4	0.002568	1.9e-05	A:0.000001	G:0.000000
QG2075_III:3339861:G->A_0603	G	A	97522	621	C:12	T:13	0.003487	2.2e-05	C:0.000000	T:0.000000	83153	561	C:11	T:13	0.003584	2.4e-05	C:0.000000	T:0.000001
QG2075_V:9402546:G->C_1072	G	C	88585	533	A:35	T:44	0.003168	1.9e-05	A:0.000001	T:0.000002	76403	477	A:35	T:44	0.003293	2.1e-05	A:0.000002	T:0.000002
QG2075_X:11406264:G->T_1683	G	T	104473	763	A:9	C:19	0.003736	2.7e-05	A:0.000000	C:0.000001	87749	679	A:8	C:18	0.003782	2.9e-05	A:0.000000	C:0.000001
QG556_I:9482067:G->A_0167	G	A	93136	50	C:14	T:50	0.003331	2e-06	C:0.000001	T:0.000002	76062	48	C:14	T:50	0.003278	2e-06	C:0.000001	T:0.000002
QG556_II:1831610:A->G_0478	A	G	25573	5	C:3	T:1	0.000915	0	C:0.000000	T:0.000000	22767	5	C:3	T:1	0.000981	0	C:0.000000	T:0.000000
QG556_III:5846768:G->A_0765	G	A	79620	41	C:15	T:12	0.002847	1e-06	C:0.000001	T:0.000000	67034	35	C:15	T:12	0.002889	2e-06	C:0.000001	T:0.000001
QG556_V:14482460:C->A_1014	C	A	89909	58	G:3	T:9	0.003215	2e-06	G:0.000000	T:0.000000	75492	48	G:3	T:9	0.003254	2e-06	G:0.000000	T:0.000000
QW947_I:2764624:A->G_0031	A	G	512	1	C:0	T:0	1.8e-05	0	C:0	T:0	463	1	C:0	T:0	2e-05	0	C:0	T:0
QW947_II:10076961:G->A_0179	G	A	48860	326	C:7	T:10	0.001747	1.2e-05	C:0.000000	T:0.000000	40518	304	C:7	T:10	0.001746	1.3e-05	C:0.000000	T:0.000000
QW947_III:8588601:A->T_0344	A	T	78876	475	C:20	G:20	0.002821	1.7e-05	C:0.000001	G:0.000001	66966	427	C:19	G:20	0.002886	1.8e-05	C:0.000001	G:0.000001
QW947_V:20143320:C->A_0914	C	A	59225	946	G:2	T:5	0.002118	3.4e-05	G:0.000000	T:0.000000	51736	859	G:2	T:5	0.00223	3.7e-05	G:0.000000	T:0.000000
QX1211_I:1493658:G->T_0246	G	T	11694	4	A:1	C:1	0.000418	0	A:0.000000	C:0.000000	10474	4	A:1	C:1	0.000451	0	A:0.000000	C:0.000000
QX1211_II:12688383:G->A_7945	G	A	62875	7	C:15	T:28	0.002248	0	C:0.000001	T:0.000001	53502	7	C:15	T:28	0.002306	0	C:0.000001	T:0.000001
QX1211_III:7161291:G->A_8933	G	A	62365	3054	C:8	T:27	0.00223	0.000109	C:0.000000	T:0.000001	54472	2740	C:8	T:27	0.002348	0.000118	C:0.000000	T:0.000001
QX1211_V:972161:C->T_10484	C	T	47282	5	A:8	G:5	0.001691	0	A:0.000000	G:0.000000	41578	5	A:8	G:5	0.001792	0	A:0.000000	G:0.000000
QX1212_I:13367217:G->A_0090	G	A	14939	7	C:1	T:3	0.000534	0	C:0.000000	T:0.000000	13372	6	C:1	T:3	0.000576	0	C:0.000000	T:0.000000
QX1212_III:13757437:C->T_0418	C	T	83909	74	A:21	G:4	0.003001	3e-06	A:0.000001	G:0.000000	71216	68	A:19	G:4	0.003069	3e-06	A:0.000001	G:0.000000
QX1212_V:3230994:G->T_0503	G	T	46902	17	A:973	C:5	0.001677	1e-06	A:0.000035	C:0.000000	40982	17	A:863	C:5	0.001766	1e-06	A:0.000037	C:0.000000
QX1212_X:8724308:G->T_3126	G	T	70341	62	A:5	C:14	0.002515	2e-06	A:0.000000	C:0.000001	60438	58	A:5	C:12	0.002605	2e-06	A:0.000000	C:0.000001
QX1791_I:4539333:A->G_0704	A	G	65953	21	C:8	T:10	0.002359	1e-06	C:0.000000	T:0.000000	56745	20	C:8	T:10	0.002446	1e-06	C:0.000000	T:0.000000
QX1791_II:2298913:A->C_2923	A	C	15282	10	G:7	T:6	0.000546	0	G:0.000000	T:0.000000	13575	10	G:7	T:5	0.000585	0	G:0.000000	T:0.000000
QX1791_III:1745381:C->T_6106	C	T	93961	49	A:10	G:4	0.00336	2e-06	A:0.000000	G:0.000000	80747	46	A:9	G:4	0.00348	2e-06	A:0.000000	G:0.000000
QX1791_IV:418983:A->T_7248	A	T	57477	11975	C:16	G:9	0.002055	0.000428	C:0.000001	G:0.000000	50299	10836	C:15	G:9	0.002168	0.000467	C:0.000001	G:0.000000
QX1792_I:8420710:T->A_0096	T	A	97677	885	C:37	G:30	0.003493	3.2e-05	C:0.000001	G:0.000001	83078	804	C:36	G:29	0.003581	3.5e-05	C:0.000002	G:0.000001
QX1792_II:4322013:A->G_1082	A	G	34088	278	C:22	T:13	0.001219	1e-05	C:0.000001	T:0.000000	30209	250	C:22	T:13	0.001302	1.1e-05	C:0.000001	T:0.000001
QX1792_III:1890559:C->T_2917	C	T	10718	71	A:0	G:1	0.000383	3e-06	A:0	G:0.000000	9634	65	A:0	G:1	0.000415	3e-06	A:0	G:0.000000
QX1792_IV:16954874:G->A_5327	G	A	0	0	C:0	T:0	0	0	C:0	T:0	0	0	C:0	T:0	0	0	C:0	T:0
QX1793_I:2317202:T->A_0058	T	A	61861	1427	C:23	G:13	0.002212	5.1e-05	C:0.000001	G:0.000000	53882	1291	C:23	G:13	0.002322	5.6e-05	C:0.000001	G:0.000001
QX1793_II:14427804:T->C_2011	T	C	77709	1931	A:36	G:124	0.002779	6.9e-05	A:0.000001	G:0.000004	65546	1717	A:36	G:124	0.002825	7.4e-05	A:0.000002	G:0.000005
QX1793_III:3898860:A->G_2193	A	G	115120	2418	C:92	T:33	0.004117	8.6e-05	C:0.000003	T:0.000001	96325	2171	C:92	T:33	0.004152	9.4e-05	C:0.000004	T:0.000001
QX1793_IV:14317301:A->T_3565	A	T	9465	189	C:3	G:4	0.000338	7e-06	C:0.000000	G:0.000000	8615	171	C:3	G:4	0.000371	7e-06	C:0.000000	G:0.000000
QX1794_II:3609977:A->C_1056	A	C	55461	668	G:35	T:24	0.001983	2.4e-05	G:0.000001	T:0.000001	49164	619	G:35	T:23	0.002119	2.7e-05	G:0.000002	T:0.000001
QX1794_III:6442022:C->G_2147	C	G	78379	838	A:16	T:5	0.002803	3e-05	A:0.000001	T:0.000000	67828	761	A:14	T:5	0.002923	3.3e-05	A:0.000001	T:0.000000
QX1794_IV:14531808:C->T_3155	C	T	29325	391	A:6	G:1	0.001049	1.4e-05	A:0.000000	G:0.000000	25466	347	A:6	G:1	0.001098	1.5e-05	A:0.000000	G:0.000000
QX1794_X:10377801:A->C_3903	A	C	78693	909	G:77	T:42	0.002814	3.3e-05	G:0.000003	T:0.000002	67530	831	G:77	T:42	0.00291	3.6e-05	G:0.000003	T:0.000002
WN2001_II:1915462:G->C_0106	G	C	15283	2	A:4	T:4	0.000547	0	A:0.000000	T:0.000000	13812	2	A:4	T:4	0.000595	0	A:0.000000	T:0.000000
WN2001_III:1714868:A->C_0280	A	C	27134	29	G:11	T:4	0.00097	1e-06	G:0.000000	T:0.000000	24217	27	G:10	T:4	0.001044	1e-06	G:0.000000	T:0.000000
WN2001_V:5142850:T->A_1227	T	A	58476	559	C:12	G:12	0.002091	2e-05	C:0.000000	G:0.000000	51613	517	C:12	G:12	0.002224	2.2e-05	C:0.000001	G:0.000001
WN2001_X:9413829:A->C_1732	A	C	62403	7349	G:17	T:14	0.002232	0.000263	G:0.000001	T:0.000001	53660	6555	G:17	T:14	0.002313	0.000283	G:0.000001	T:0.000001
XZ1513_I:1658407:T->A_0017	T	A	114648	41	C:348	G:35	0.0041	1e-06	C:0.000012	G:0.000001	91255	33	C:308	G:35	0.003933	1e-06	C:0.000013	G:0.000002
XZ1513_II:3924448:T->A_0587	T	A	114070	380	C:35	G:46	0.004079	1.4e-05	C:0.000001	G:0.000002	95740	337	C:34	G:46	0.004126	1.5e-05	C:0.000001	G:0.000002
XZ1513_V:19369709:C->G_2258	C	G	13396	51	A:2	T:1	0.000479	2e-06	A:0.000000	T:0.000000	12015	43	A:2	T:1	0.000518	2e-06	A:0.000000	T:0.000000
XZ1513_X:11024830:G->A_2766	G	A	33102	81	C:4	T:9	0.001184	3e-06	C:0.000000	T:0.000000	29262	78	C:4	T:9	0.001261	3e-06	C:0.000000	T:0.000000
XZ1514_I:2833139:C->T_1997	C	T	92537	633	A:8	G:0	0.003309	2.3e-05	A:0.000000	G:0	78680	563	A:7	G:0	0.003391	2.4e-05	A:0.000000	G:0
XZ1514_II:2134220:A->C_7608	A	C	25128	529	G:1	T:3	0.000899	1.9e-05	G:0.000000	T:0.000000	22423	481	G:1	T:3	0.000966	2.1e-05	G:0.000000	T:0.000000
XZ1514_III:11917940:T->A_17136	T	A	65684	466	C:19	G:12	0.002349	1.7e-05	C:0.000001	G:0.000000	55973	412	C:19	G:12	0.002412	1.8e-05	C:0.000001	G:0.000001
XZ1514_IV:4851047:A->G_20618	A	G	86044	560	C:42	T:22	0.003077	2e-05	C:0.000002	T:0.000001	74598	512	C:42	T:22	0.003215	2.2e-05	C:0.000002	T:0.000001
XZ1515_I:14784181:T->A_2548	T	A	0	0	C:0	G:0	0	0	C:0	G:0	0	0	C:0	G:0	0	0	C:0	G:0
XZ1515_II:2854786:C->A_2956	C	A	68543	262	G:8	T:16	0.002451	9e-06	G:0.000000	T:0.000001	60124	239	G:8	T:16	0.002591	1e-05	G:0.000000	T:0.000001
XZ1515_IV:5669898:G->T_3597	G	T	46789	210	A:4	C:5	0.001673	8e-06	A:0.000000	C:0.000000	41583	198	A:4	C:5	0.001792	9e-06	A:0.000000	C:0.000000
XZ1515_X:2664105:A->T_7071	A	T	88440	428	C:26	G:14	0.003163	1.5e-05	C:0.000001	G:0.000001	74600	377	C:26	G:14	0.003215	1.6e-05	C:0.000001	G:0.000001
XZ1516_I:13002705:A->T_13072	A	T	41263	27	C:25	G:25	0.001476	1e-06	C:0.000001	G:0.000001	36047	26	C:25	G:25	0.001554	1e-06	C:0.000001	G:0.000001
XZ1516_II:10948783:G->A_30535	G	A	24629	39	C:8	T:13	0.000881	1e-06	C:0.000000	T:0.000000	21669	37	C:8	T:13	0.000934	2e-06	C:0.000000	T:0.000001
XZ1516_III:13107706:A->C_52533	A	C	69780	102	G:6	T:4	0.002495	4e-06	G:0.000000	T:0.000000	59734	86	G:6	T:4	0.002574	4e-06	G:0.000000	T:0.000000
XZ1516_IV:535476:T->A_53684	T	A	79697	2850	C:65	G:103	0.00285	0.000102	C:0.000002	G:0.000004	67990	2766	C:65	G:102	0.00293	0.000119	C:0.000003	G:0.000004

## Sheet: Rep1_d1_recovery
# sample ID:	L2.combined
# reads in library:	60333189	(51570687 unique UMIs)
# reads with lig_probe sequence:	56742933	(41727666 unique UMIs)
# reads with lig_probe and scan sequence (up to SNP):	44801596	(36465925 unique UMIs)
# reads with no match:	3590256	(3288088 unique UMIs)
mip_name	ref	alt	ref_read_count	alt_read_count	other1_read_count	other2_read_count	ref_read_freq	alt_read_freq	other1_read_freq	other2_read_freq	ref_umi_count	alt_umi_count	other1_umi_count	other2_umi_count	ref_umi_freq	alt_umi_freq	other1_umi_freq	other2_umi_freq
CB4854_I:1341686:T->C,A_0099	T	C	135069	146	A:245	G:15	0.003015	3e-06	A:0.000005	G:0.000000	113840	139	A:232	G:15	0.003122	4e-06	A:0.000006	G:0.000000
ECA348_V:19083280:A->G,C_0727	A	G	94400	37607	C:112	T:30	0.002107	0.000839	C:0.000002	T:0.000001	82317	31818	C:105	T:30	0.002257	0.000873	C:0.000003	T:0.000001
JU1652_III:12677731:C->T,G_1197	C	T	67610	2780	A:6	G:4	0.001509	6.2e-05	A:0.000000	G:0.000000	57430	2550	A:5	G:4	0.001575	7e-05	A:0.000000	G:0.000000
JU1793_V:4157532:G->C,A_0307	G	C	100499	17	A:19	T:29	0.002243	0	A:0.000000	T:0.000001	85572	16	A:14	T:29	0.002347	0	A:0.000000	T:0.000001
JU2316_V:3840034:C->T,A_0362	C	T	101846	11	A:15	G:3	0.002273	0	A:0.000000	G:0.000000	88045	10	A:14	G:3	0.002414	0	A:0.000000	G:0.000000
MY23_II:13379927:A->G,T_0536	A	G	53018	6	C:10	T:2508	0.001183	0	C:0.000000	T:0.000056	46065	6	C:10	T:2317	0.001263	0	C:0.000000	T:0.000064
NIC195_III:12677731:C->G,T_0554	C	G	0	0	A:0	T:0	0	0	A:0	T:0	0	0	A:0	T:0	0	0	A:0	T:0
NIC258_I:3170723:G->T,A_0026	G	T	53793	3222	A:2235	C:9	0.001201	7.2e-05	A:0.000050	C:0.000000	47242	2885	A:2073	C:8	0.001296	7.9e-05	A:0.000057	C:0.000000
NIC523_II:3632053:A->T,C_0353	A	T	149146	1009	C:31482	G:16	0.003329	2.3e-05	C:0.000703	G:0.000000	124387	912	C:22482	G:16	0.003411	2.5e-05	C:0.000617	G:0.000000
CB4854_II:14776068:G->A_1044	G	A	35574	103	C:14	T:24	0.000794	2e-06	C:0.000000	T:0.000001	31817	97	C:13	T:24	0.000873	3e-06	C:0.000000	T:0.000001
CB4854_IV:13844144:T->C_1393	T	C	0	0	A:0	G:0	0	0	A:0	G:0	0	0	A:0	G:0	0	0	A:0	G:0
CB4854_X:15144403:A->T_1770	A	T	84394	113	C:96	G:108	0.001884	3e-06	C:0.000002	G:0.000002	71913	105	C:95	G:107	0.001972	3e-06	C:0.000003	G:0.000003
CB4856_I:9767293:G->A_2812	G	A	97195	354	C:18	T:25	0.002169	8e-06	C:0.000000	T:0.000001	83248	316	C:18	T:24	0.002283	9e-06	C:0.000000	T:0.000001
CB4856_III:1209062:A->G_9612	A	G	41134	135	C:11	T:4	0.000918	3e-06	C:0.000000	T:0.000000	36749	121	C:10	T:4	0.001008	3e-06	C:0.000000	T:0.000000
CB4856_IV:1607284:A->C_12264	A	C	128900	619	G:134	T:99	0.002877	1.4e-05	G:0.000003	T:0.000002	106616	580	G:134	T:99	0.002924	1.6e-05	G:0.000004	T:0.000003
CB4856_X:13967551:G->A_23167	G	A	103478	345	C:13	T:33	0.00231	8e-06	C:0.000000	T:0.000001	88040	311	C:13	T:33	0.002414	9e-06	C:0.000000	T:0.000001
CX11254_II:12788569:T->A_0182	T	A	42549	2	C:6	G:11	0.00095	0	C:0.000000	G:0.000000	38111	2	C:6	G:11	0.001045	0	C:0.000000	G:0.000000
CX11254_III:10578934:G->A_0248	G	A	148627	110	C:75	T:51	0.003317	2e-06	C:0.000002	T:0.000001	124995	105	C:74	T:50	0.003428	3e-06	C:0.000002	T:0.000001
CX11254_V:13687742:A->C_0333	A	C	137770	16	G:20	T:19	0.003075	0	G:0.000000	T:0.000000	114950	16	G:20	T:18	0.003152	0	G:0.000001	T:0.000000
CX11254_V:238621:A->G_0301	A	G	129070	72	C:39	T:25	0.002881	2e-06	C:0.000001	T:0.000001	109300	71	C:39	T:24	0.002997	2e-06	C:0.000001	T:0.000001
CX11262_I:12073209:C->A_0057	C	A	16667	1	G:1	T:0	0.000372	0	G:0.000000	T:0	15086	1	G:1	T:0	0.000414	0	G:0.000000	T:0
CX11262_III:12331372:T->A_0209	T	A	64603	130	C:18	G:933	0.001442	3e-06	C:0.000000	G:0.000021	56543	119	C:18	G:806	0.001551	3e-06	C:0.000000	G:0.000022
CX11262_V:19829399:C->T_0424	C	T	115947	1026	A:103	G:53	0.002588	2.3e-05	A:0.000002	G:0.000001	93273	870	A:94	G:51	0.002558	2.4e-05	A:0.000003	G:0.000001
CX11264_IV:11244600:G->A_0125	G	A	160319	952	C:83	T:165	0.003578	2.1e-05	C:0.000002	T:0.000004	125028	885	C:83	T:162	0.003429	2.4e-05	C:0.000002	T:0.000004
CX11264_V:17198338:C->G_0165	C	G	109477	638	A:14	T:12	0.002444	1.4e-05	A:0.000000	T:0.000000	90952	583	A:14	T:12	0.002494	1.6e-05	A:0.000000	T:0.000000
CX11264_X:2275255:G->C_0412	G	C	127833	778	A:18	T:36	0.002853	1.7e-05	A:0.000000	T:0.000001	105923	709	A:18	T:36	0.002905	1.9e-05	A:0.000000	T:0.000001
CX11264_X:6426986:A->C_0583	A	C	102904	626	G:37	T:37	0.002297	1.4e-05	G:0.000001	T:0.000001	85478	577	G:35	T:37	0.002344	1.6e-05	G:0.000001	T:0.000001
CX11271_I:10356319:G->A_0062	G	A	189511	3829	C:31	T:78	0.00423	8.5e-05	C:0.000001	T:0.000002	152365	3412	C:31	T:77	0.004178	9.4e-05	C:0.000001	T:0.000002
CX11271_II:12842575:T->A_0147	T	A	10410	231	C:4	G:2	0.000232	5e-06	C:0.000000	G:0.000000	9556	214	C:4	G:2	0.000262	6e-06	C:0.000000	G:0.000000
CX11271_III:2697403:C->G_0218	C	G	68718	1311	A:11	T:12	0.001534	2.9e-05	A:0.000000	T:0.000000	60942	1199	A:11	T:12	0.001671	3.3e-05	A:0.000000	T:0.000000
CX11271_IV:1231923:C->T_0690	C	T	84632	1979	A:12	G:6	0.001889	4.4e-05	A:0.000000	G:0.000000	72713	1817	A:12	G:6	0.001994	5e-05	A:0.000000	G:0.000000
CX11276_I:11281245:C->T_0361	C	T	98489	738	A:18	G:3	0.002198	1.6e-05	A:0.000000	G:0.000000	84681	691	A:17	G:3	0.002322	1.9e-05	A:0.000000	G:0.000000
CX11276_III:359396:G->A_1022	G	A	84514	694	C:48	T:44	0.001886	1.5e-05	C:0.000001	T:0.000001	71263	640	C:47	T:43	0.001954	1.8e-05	C:0.000001	T:0.000001
CX11276_V:20320751:A->G_1810	A	G	122385	1030	C:173	T:112	0.002732	2.3e-05	C:0.000004	T:0.000002	102347	949	C:173	T:112	0.002807	2.6e-05	C:0.000005	T:0.000003
CX11276_X:15381676:C->T_2053	C	T	22595	158	A:52	G:16	0.000504	4e-06	A:0.000001	G:0.000000	21076	152	A:52	G:16	0.000578	4e-06	A:0.000001	G:0.000000
CX11285_II:9262194:G->A_0142	G	A	187161	970	C:25	T:48	0.004178	2.2e-05	C:0.000001	T:0.000001	146551	890	C:25	T:48	0.004019	2.4e-05	C:0.000001	T:0.000001
CX11285_III:12362318:G->C_0276	G	C	31947	2	A:5	T:3	0.000713	0	A:0.000000	T:0.000000	28768	2	A:5	T:3	0.000789	0	A:0.000000	T:0.000000
CX11285_IV:4747802:C->A_0343	C	A	66205	515	G:1	T:5	0.001478	1.1e-05	G:0.000000	T:0.000000	56793	483	G:1	T:5	0.001557	1.3e-05	G:0.000000	T:0.000000
CX11285_X:7864359:A->C_0624	A	C	69306	712	G:14	T:8	0.001547	1.6e-05	G:0.000000	T:0.000000	60260	647	G:14	T:8	0.001653	1.8e-05	G:0.000000	T:0.000000
CX11307_I:11966814:T->G_0086	T	G	91636	819	A:6	C:55	0.002045	1.8e-05	A:0.000000	C:0.000001	80268	756	A:6	C:55	0.002201	2.1e-05	A:0.000000	C:0.000002
CX11307_II:11271250:G->A_0349	G	A	87533	728	C:13	T:17	0.001954	1.6e-05	C:0.000000	T:0.000000	77069	671	C:13	T:17	0.002113	1.8e-05	C:0.000000	T:0.000000
CX11307_IV:16321575:C->T_0502	C	T	62485	528	A:21	G:1	0.001395	1.2e-05	A:0.000000	G:0.000000	55120	487	A:19	G:1	0.001512	1.3e-05	A:0.000001	G:0.000000
CX11307_V:16498729:A->T_0707	A	T	54176	5	C:4	G:15	0.001209	0	C:0.000000	G:0.000000	48247	5	C:4	G:15	0.001323	0	C:0.000000	G:0.000000
DL200_I:14791278:G->A_0113	G	A	109724	4426	C:26	T:44	0.002449	9.9e-05	C:0.000001	T:0.000001	93819	4037	C:26	T:43	0.002573	0.000111	C:0.000001	T:0.000001
DL200_II:10684581:C->T_0188	C	T	50557	36866	A:10	G:14	0.001128	0.000823	A:0.000000	G:0.000000	44328	32724	A:10	G:13	0.001216	0.000897	A:0.000000	G:0.000000
DL200_V:17954136:A->G_0656	A	G	117533	4022	C:26	T:12	0.002623	9e-05	C:0.000001	T:0.000000	98131	3675	C:25	T:12	0.002691	0.000101	C:0.000001	T:0.000000
DL200_X:16129009:C->T_0867	C	T	96066	3736	A:24	G:68	0.002144	8.3e-05	A:0.000001	G:0.000002	80487	3446	A:24	G:68	0.002207	9.4e-05	A:0.000001	G:0.000002
DL226_I:15015474:A->T_0374	A	T	152321	460	C:37	G:19	0.0034	1e-05	C:0.000001	G:0.000000	127016	434	C:37	G:19	0.003483	1.2e-05	C:0.000001	G:0.000001
DL226_II:9596545:G->T_0445	G	T	63272	42417	A:12	C:16	0.001412	0.000947	A:0.000000	C:0.000000	56834	38899	A:12	C:16	0.001559	0.001067	A:0.000000	C:0.000000
DL226_IV:13272736:G->A_0890	G	A	125028	450	C:30	T:33	0.002791	1e-05	C:0.000001	T:0.000001	106718	411	C:29	T:33	0.002927	1.1e-05	C:0.000001	T:0.000001
DL226_V:16590610:A->T_1043	A	T	66271	432	C:41	G:23	0.001479	1e-05	C:0.000001	G:0.000001	57890	404	C:41	G:23	0.001588	1.1e-05	C:0.000001	G:0.000001
DL238_I:12524422:A->T_2849	A	T	35508	382	C:5	G:19	0.000793	9e-06	C:0.000000	G:0.000000	30358	357	C:5	G:19	0.000833	1e-05	C:0.000000	G:0.000001
DL238_II:12072245:G->T_7537	G	T	134	1	A:0	C:0	3e-06	0	A:0	C:0	127	1	A:0	C:0	3e-06	0	A:0	C:0
DL238_III:12556120:G->T_11662	G	T	233071	2274	A:15	C:54	0.005202	5.1e-05	A:0.000000	C:0.000001	186223	2093	A:15	C:53	0.005107	5.7e-05	A:0.000000	C:0.000001
DL238_IV:807883:A->T_12381	A	T	148309	1490	C:138	G:90	0.00331	3.3e-05	C:0.000003	G:0.000002	120409	1378	C:138	G:89	0.003302	3.8e-05	C:0.000004	G:0.000002
ECA189_I:11586767:T->A_0519	T	A	146326	246	C:55	G:109	0.003266	5e-06	C:0.000001	G:0.000002	122057	233	C:54	G:109	0.003347	6e-06	C:0.000001	G:0.000003
ECA189_III:3209354:T->C_3149	T	C	99779	167	A:2	G:32	0.002227	4e-06	A:0.000000	G:0.000001	85775	155	A:2	G:32	0.002352	4e-06	A:0.000000	G:0.000001
ECA189_IV:16342115:G->A_5404	G	A	58681	111	C:8	T:6	0.00131	2e-06	C:0.000000	T:0.000000	52432	105	C:8	T:5	0.001438	3e-06	C:0.000000	T:0.000000
ECA189_V:18750651:G->A_7860	G	A	87630	625	C:20	T:35	0.001956	1.4e-05	C:0.000000	T:0.000001	75331	601	C:20	T:35	0.002066	1.6e-05	C:0.000001	T:0.000001
ECA191_I:14707170:A->G_5392	A	G	177594	136	C:143	T:60	0.003964	3e-06	C:0.000003	T:0.000001	145689	135	C:143	T:60	0.003995	4e-06	C:0.000004	T:0.000002
ECA191_II:11937699:A->G_9779	A	G	177707	540	C:229	T:168	0.003967	1.2e-05	C:0.000005	T:0.000004	146021	513	C:227	T:167	0.004004	1.4e-05	C:0.000006	T:0.000005
ECA191_III:13349506:G->C_16643	G	C	196680	515	A:12862	T:123	0.00439	1.1e-05	A:0.000287	T:0.000003	159163	477	A:12483	T:123	0.004365	1.3e-05	A:0.000342	T:0.000003
ECA191_IV:1126414:G->A_17243	G	A	161575	302	C:21	T:38	0.003606	7e-06	C:0.000000	T:0.000001	131084	282	C:20	T:38	0.003595	8e-06	C:0.000001	T:0.000001
ECA348_II:1153436:G->A_0106	G	A	204101	79534	C:59	T:76	0.004556	0.001775	C:0.000001	T:0.000002	162988	68098	C:58	T:76	0.00447	0.001867	C:0.000002	T:0.000002
ECA348_III:1413663:G->T_0380	G	T	23785	10	A:2	C:1	0.000531	0	A:0.000000	C:0.000000	21810	9	A:2	C:1	0.000598	0	A:0.000000	C:0.000000
ECA348_IV:1833820:C->T_0459	C	T	163420	21	A:34	G:3	0.003648	0	A:0.000001	G:0.000000	136829	21	A:34	G:3	0.003752	1e-06	A:0.000001	G:0.000000
ECA363_I:2855432:G->T_0582	G	T	29278	753	A:1	C:7	0.000654	1.7e-05	A:0.000000	C:0.000000	26348	696	A:1	C:6	0.000723	1.9e-05	A:0.000000	C:0.000000
ECA363_II:15266803:A->C_8126	A	C	162248	4180	G:71	T:43	0.003621	9.3e-05	G:0.000002	T:0.000001	134297	3818	G:71	T:43	0.003683	0.000105	G:0.000002	T:0.000001
ECA363_III:11578112:G->T_11060	G	T	24423	463	A:6	C:3	0.000545	1e-05	A:0.000000	C:0.000000	22025	435	A:6	C:3	0.000604	1.2e-05	A:0.000000	C:0.000000
ECA363_IV:16962528:A->T_14602	A	T	146191	3356	C:51	G:26	0.003263	7.5e-05	C:0.000001	G:0.000001	121527	3117	C:49	G:26	0.003333	8.5e-05	C:0.000001	G:0.000001
ECA369_I:7301895:A->T_2312	A	T	135335	161	C:30	G:13	0.003021	4e-06	C:0.000001	G:0.000000	115785	150	C:30	G:13	0.003175	4e-06	C:0.000001	G:0.000000
ECA369_II:11110077:A->C_10550	A	C	121126	166	G:31	T:14	0.002704	4e-06	G:0.000001	T:0.000000	103523	153	G:31	T:14	0.002839	4e-06	G:0.000001	T:0.000000
ECA369_III:9234831:T->C_14531	T	C	116298	169	A:7	G:32	0.002596	4e-06	A:0.000000	G:0.000001	99615	151	A:6	G:32	0.002732	4e-06	A:0.000000	G:0.000001
ECA369_IV:2126314:A->T_17026	A	T	22744	23	C:8	G:3	0.000508	1e-06	C:0.000000	G:0.000000	20256	21	C:8	G:3	0.000555	1e-06	C:0.000000	G:0.000000
ECA36_I:14280567:G->A_2727	G	A	76924	687	C:16	T:16	0.001717	1.5e-05	C:0.000000	T:0.000000	67247	635	C:16	T:16	0.001844	1.7e-05	C:0.000000	T:0.000000
ECA36_II:4106388:G->A_4154	G	A	179251	1569	C:17	T:39	0.004001	3.5e-05	C:0.000000	T:0.000001	142980	1408	C:17	T:39	0.003921	3.9e-05	C:0.000000	T:0.000001
ECA36_III:3384340:A->T_5733	A	T	151012	1258	C:23	G:20	0.003371	2.8e-05	C:0.000001	G:0.000000	124839	1166	C:23	G:20	0.003423	3.2e-05	C:0.000001	G:0.000001
ECA36_V:11695823:G->A_9401	G	A	163580	1411	C:29	T:57	0.003651	3.1e-05	C:0.000001	T:0.000001	131031	1297	C:26	T:56	0.003593	3.6e-05	C:0.000001	T:0.000002
ECA372_I:10364967:A->C_0096	A	C	119753	479	G:24	T:14	0.002673	1.1e-05	G:0.000001	T:0.000000	102029	435	G:24	T:13	0.002798	1.2e-05	G:0.000001	T:0.000000
ECA372_II:11316190:A->T_0369	A	T	94332	356	C:22	G:13	0.002106	8e-06	C:0.000000	G:0.000000	82630	325	C:20	G:12	0.002266	9e-06	C:0.000001	G:0.000000
ECA372_III:11364415:T->A_1258	T	A	118257	613	C:89	G:49	0.00264	1.4e-05	C:0.000002	G:0.000001	101960	581	C:85	G:49	0.002796	1.6e-05	C:0.000002	G:0.000001
ECA372_IV:2045158:T->C_1388	T	C	322257	33900	A:436	G:2545	0.007193	0.000757	A:0.000010	G:0.000057	248738	30089	A:392	G:2314	0.006821	0.000825	A:0.000011	G:0.000063
ECA396_I:3015432:A->G_2360	A	G	205371	10089	C:117	T:52	0.004584	0.000225	C:0.000003	T:0.000001	166274	9095	C:117	T:51	0.00456	0.000249	C:0.000003	T:0.000001
ECA396_II:13495597:A->T_10714	A	T	20648	1564	C:1	G:1	0.000461	3.5e-05	C:0.000000	G:0.000000	18934	1437	C:1	G:1	0.000519	3.9e-05	C:0.000000	G:0.000000
ECA396_III:10621403:A->T_15513	A	T	139640	6501	C:39	G:22	0.003117	0.000145	C:0.000001	G:0.000000	117261	5867	C:39	G:22	0.003216	0.000161	C:0.000001	G:0.000001
ECA396_IV:1970902:T->G_19550	T	G	67363	3308	A:8	C:23	0.001504	7.4e-05	A:0.000000	C:0.000001	58840	3036	A:8	C:23	0.001614	8.3e-05	A:0.000000	C:0.000001
ED3017_II:7097200:A->G_0150	A	G	40265	26	C:33	T:6	0.000899	1e-06	C:0.000001	T:0.000000	35430	24	C:33	T:6	0.000972	1e-06	C:0.000001	T:0.000000
ED3017_III:6807400:C->T_0264	C	T	21341	15	A:5	G:1	0.000476	0	A:0.000000	G:0.000000	19496	15	A:5	G:1	0.000535	0	A:0.000000	G:0.000000
ED3017_V:1262829:A->G_0389	A	G	91280	74	C:60	T:34	0.002037	2e-06	C:0.000001	T:0.000001	78249	68	C:59	T:34	0.002146	2e-06	C:0.000002	T:0.000001
ED3017_X:11778002:A->G_0598	A	G	97182	70	C:35	T:17	0.002169	2e-06	C:0.000001	T:0.000000	84539	67	C:34	T:17	0.002318	2e-06	C:0.000001	T:0.000000
ED3049_I:12027316:C->T_0038	C	T	312281	10141	A:72	G:32	0.00697	0.000226	A:0.000002	G:0.000001	227620	8737	A:69	G:31	0.006242	0.00024	A:0.000002	G:0.000001
ED3049_II:3204961:G->A_0083	G	A	7590	3	C:0	T:1	0.000169	0	C:0	T:0.000000	6939	3	C:0	T:1	0.00019	0	C:0	T:0.000000
ED3049_III:11014743:C->T_0123	C	T	36465	62	A:6	G:4	0.000814	1e-06	A:0.000000	G:0.000000	32877	57	A:6	G:4	0.000902	2e-06	A:0.000000	G:0.000000
ED3049_X:16679324:T->A_0225	T	A	135972	237	C:49	G:34	0.003035	5e-06	C:0.000001	G:0.000001	114250	215	C:47	G:34	0.003133	6e-06	C:0.000001	G:0.000001
ED3052_I:7194841:C->T_0050	C	T	139243	156	A:23	G:5	0.003108	3e-06	A:0.000001	G:0.000000	115498	141	A:23	G:5	0.003167	4e-06	A:0.000001	G:0.000000
ED3052_IV:2165510:T->A_0315	T	A	138688	126	C:37	G:32	0.003096	3e-06	C:0.000001	G:0.000001	116800	117	C:36	G:32	0.003203	3e-06	C:0.000001	G:0.000001
ED3052_V:20525028:C->A_0538	C	A	153463	165	G:11	T:29	0.003425	4e-06	G:0.000000	T:0.000001	125917	154	G:11	T:29	0.003453	4e-06	G:0.000000	T:0.000001
ED3052_X:8969998:A->C_0604	A	C	127589	188	G:71	T:20	0.002848	4e-06	G:0.000002	T:0.000000	108158	172	G:71	T:20	0.002966	5e-06	G:0.000002	T:0.000001
ED3077_I:2393375:A->T_0027	A	T	140749	1703	C:30	G:28	0.003142	3.8e-05	C:0.000001	G:0.000001	117095	1562	C:30	G:28	0.003211	4.3e-05	C:0.000001	G:0.000001
ED3077_II:5937487:C->G_0195	C	G	72926	843	A:12	T:7	0.001628	1.9e-05	A:0.000000	T:0.000000	64163	793	A:12	T:7	0.00176	2.2e-05	A:0.000000	T:0.000000
ED3077_IV:16879562:G->A_0482	G	A	143580	1393	C:26	T:37	0.003205	3.1e-05	C:0.000001	T:0.000001	107080	1281	C:26	T:37	0.002936	3.5e-05	C:0.000001	T:0.000001
ED3077_X:8913678:T->C_0771	T	C	102754	1308	A:7	G:51	0.002294	2.9e-05	A:0.000000	G:0.000001	86840	1160	A:7	G:51	0.002381	3.2e-05	A:0.000000	G:0.000001
EG4724_II:7136618:G->A_0180	G	A	128858	315	C:13	T:26	0.002876	7e-06	C:0.000000	T:0.000001	105974	292	C:12	T:26	0.002906	8e-06	C:0.000000	T:0.000001
EG4724_III:10636443:T->C_0370	T	C	160529	434	A:9	G:45	0.003583	1e-05	A:0.000000	G:0.000001	130165	405	A:9	G:45	0.003569	1.1e-05	A:0.000000	G:0.000001
EG4724_IV:17009681:A->G_0675	A	G	126556	220	C:59	T:21	0.002825	5e-06	C:0.000001	T:0.000000	106252	203	C:58	T:21	0.002914	6e-06	C:0.000002	T:0.000001
EG4724_X:14548706:A->T_0884	A	T	141838	403	C:49	G:40	0.003166	9e-06	C:0.000001	G:0.000001	114656	372	C:48	G:39	0.003144	1e-05	C:0.000001	G:0.000001
EG4725_I:39226:C->A_0001	C	A	72378	839	G:5	T:10	0.001616	1.9e-05	G:0.000000	T:0.000000	63290	764	G:5	T:10	0.001736	2.1e-05	G:0.000000	T:0.000000
EG4725_II:14784049:A->C_0335	A	C	42559	428	G:35	T:17	0.00095	1e-05	G:0.000001	T:0.000000	38016	397	G:35	T:17	0.001043	1.1e-05	G:0.000001	T:0.000000
EG4725_III:12433227:C->A_0601	C	A	60830	16751	G:9	T:13	0.001358	0.000374	G:0.000000	T:0.000000	52972	15097	G:9	T:13	0.001453	0.000414	G:0.000000	T:0.000000
EG4725_X:13347083:A->T_2067	A	T	120214	1583	C:28	G:21	0.002683	3.5e-05	C:0.000001	G:0.000000	101943	1461	C:28	G:20	0.002796	4e-05	C:0.000001	G:0.000001
GXW1_II:12402155:A->G_0303	A	G	109708	1616	C:14	T:7	0.002449	3.6e-05	C:0.000000	T:0.000000	95121	1492	C:14	T:7	0.002608	4.1e-05	C:0.000000	T:0.000000
GXW1_III:2725552:G->A_0397	G	A	145804	1680	C:25	T:40	0.003254	3.7e-05	C:0.000001	T:0.000001	123806	1552	C:25	T:39	0.003395	4.3e-05	C:0.000001	T:0.000001
GXW1_V:18684493:A->G_0830	A	G	87959	1399	C:37	T:15	0.001963	3.1e-05	C:0.000001	T:0.000000	75135	1265	C:36	T:15	0.00206	3.5e-05	C:0.000001	T:0.000000
GXW1_X:12028861:C->T_0941	C	T	108657	1313	A:13	G:1	0.002425	2.9e-05	A:0.000000	G:0.000000	91990	1169	A:13	G:1	0.002523	3.2e-05	A:0.000000	G:0.000000
JU1212_I:11540544:C->G_0174	C	G	31110	53	A:1	T:3	0.000694	1e-06	A:0.000000	T:0.000000	27605	48	A:1	T:3	0.000757	1e-06	A:0.000000	T:0.000000
JU1212_II:10563991:T->C_0567	T	C	131536	320	A:18	G:28	0.002936	7e-06	A:0.000000	G:0.000001	111846	295	A:18	G:28	0.003067	8e-06	A:0.000000	G:0.000001
JU1212_III:8737128:A->T_0615	A	T	82108	153	C:48	G:39	0.001833	3e-06	C:0.000001	G:0.000001	71814	144	C:48	G:39	0.001969	4e-06	C:0.000001	G:0.000001
JU1212_V:9120137:A->C_0768	A	C	99327	245	G:74	T:50	0.002217	5e-06	G:0.000002	T:0.000001	85088	228	G:73	T:50	0.002333	6e-06	G:0.000002	T:0.000001
JU1400_I:2752711:A->G_0030	A	G	111555	71	C:12	T:2	0.00249	2e-06	C:0.000000	T:0.000000	91964	68	C:12	T:2	0.002522	2e-06	C:0.000000	T:0.000000
JU1400_II:4073439:A->T_0295	A	T	169711	92	C:25	G:60	0.003788	2e-06	C:0.000001	G:0.000001	133529	88	C:25	G:57	0.003662	2e-06	C:0.000001	G:0.000002
JU1400_III:11372974:C->T_0900	C	T	138419	98	A:44	G:35	0.00309	2e-06	A:0.000001	G:0.000001	112100	95	A:41	G:35	0.003074	3e-06	A:0.000001	G:0.000001
JU1400_X:2853367:T->A_1277	T	A	63824	56	C:20	G:36	0.001425	1e-06	C:0.000000	G:0.000001	56617	53	C:20	G:36	0.001553	1e-06	C:0.000001	G:0.000001
JU1581_I:8999758:C->T_0517	C	T	94218	45	A:20	G:2	0.002103	1e-06	A:0.000000	G:0.000000	82522	40	A:18	G:2	0.002263	1e-06	A:0.000000	G:0.000000
JU1581_II:11292203:G->A_0721	G	A	122559	76	C:28	T:27	0.002736	2e-06	C:0.000001	T:0.000001	103551	74	C:28	T:27	0.00284	2e-06	C:0.000001	T:0.000001
JU1581_V:18309531:C->T_0943	C	T	141530	54	A:20	G:7	0.003159	1e-06	A:0.000000	G:0.000000	119442	50	A:19	G:7	0.003275	1e-06	A:0.000001	G:0.000000
JU1581_X:15153830:C->T_1083	C	T	33854	12	A:4	G:0	0.000756	0	A:0.000000	G:0	30517	11	A:4	G:0	0.000837	0	A:0.000000	G:0
JU1652_I:8786203:C->G_0049	C	G	58387	1415	A:6	T:2	0.001303	3.2e-05	A:0.000000	T:0.000000	51141	1292	A:6	T:2	0.001402	3.5e-05	A:0.000000	T:0.000000
JU1652_IV:13210351:G->C_1309	G	C	108071	3397	A:11	T:30	0.002412	7.6e-05	A:0.000000	T:0.000001	91982	3123	A:11	T:30	0.002522	8.6e-05	A:0.000000	T:0.000001
JU1652_V:10767051:G->A_1404	G	A	112555	3256	C:9	T:32	0.002512	7.3e-05	C:0.000000	T:0.000001	93857	2969	C:9	T:32	0.002574	8.1e-05	C:0.000000	T:0.000001
JU1793_II:2945994:C->T_0041	C	T	80351	98	A:18	G:9	0.001793	2e-06	A:0.000000	G:0.000000	69975	89	A:15	G:9	0.001919	2e-06	A:0.000000	G:0.000000
JU1793_II:3806941:A->G_0047	A	G	131541	184	C:67	T:18	0.002936	4e-06	C:0.000001	T:0.000000	111373	178	C:66	T:18	0.003054	5e-06	C:0.000002	T:0.000000
JU1793_V:1692047:T->C_0236	T	C	38204	42	A:5	G:6	0.000853	1e-06	A:0.000000	G:0.000000	34022	36	A:5	G:6	0.000933	1e-06	A:0.000000	G:0.000000
JU1896_I:5502853:G->A_0065	G	A	127324	2415	C:22	T:21	0.002842	5.4e-05	C:0.000000	T:0.000000	106809	2218	C:22	T:21	0.002929	6.1e-05	C:0.000001	T:0.000001
JU1896_II:4600308:A->T_0489	A	T	31150	550	C:17	G:6	0.000695	1.2e-05	C:0.000000	G:0.000000	27197	508	C:17	G:6	0.000746	1.4e-05	C:0.000000	G:0.000000
JU1896_IV:13794865:A->G_0782	A	G	105583	1826	C:35	T:11	0.002357	4.1e-05	C:0.000001	T:0.000000	91204	1679	C:34	T:10	0.002501	4.6e-05	C:0.000001	T:0.000000
JU1896_V:10431734:T->C_0892	T	C	67570	40	A:4	G:28	0.001508	1e-06	A:0.000000	G:0.000001	58882	39	A:4	G:28	0.001615	1e-06	A:0.000000	G:0.000001
JU2001_I:14297638:A->T_0187	A	T	135093	24	C:31	G:28	0.003015	1e-06	C:0.000001	G:0.000001	113526	24	C:31	G:28	0.003113	1e-06	C:0.000001	G:0.000001
JU2001_II:308380:T->C_0291	T	C	202955	63	A:9	G:32	0.00453	1e-06	A:0.000000	G:0.000001	165957	61	A:9	G:32	0.004551	2e-06	A:0.000000	G:0.000001
JU2001_V:15526581:G->A_2950	G	A	92279	14	C:16	T:18	0.00206	0	C:0.000000	T:0.000000	77753	12	C:14	T:18	0.002132	0	C:0.000000	T:0.000000
JU2001_X:9040599:A->T_3337	A	T	119255	13	C:13	G:18	0.002662	0	C:0.000000	G:0.000000	102427	13	C:13	G:18	0.002809	0	C:0.000000	G:0.000000
JU2007_I:5430397:C->T_0248	C	T	114677	3165	A:16	G:4	0.00256	7.1e-05	A:0.000000	G:0.000000	97768	2932	A:14	G:4	0.002681	8e-05	A:0.000000	G:0.000000
JU2007_II:12372731:C->T_0541	C	T	114746	3184	A:16	G:7	0.002561	7.1e-05	A:0.000000	G:0.000000	98614	2928	A:15	G:7	0.002704	8e-05	A:0.000000	G:0.000000
JU2007_III:11370145:T->C_0695	T	C	96100	3502	A:3	G:30	0.002145	7.8e-05	A:0.000000	G:0.000001	82089	3209	A:3	G:30	0.002251	8.8e-05	A:0.000000	G:0.000001
JU2007_IV:1822603:G->C_0728	G	C	81316	2098	A:26	T:46	0.001815	4.7e-05	A:0.000001	T:0.000001	70946	1934	A:24	T:45	0.001946	5.3e-05	A:0.000001	T:0.000001
JU2017_I:13367225:T->C_0323	T	C	82457	1570	A:6	G:19	0.00184	3.5e-05	A:0.000000	G:0.000000	70264	1467	A:6	G:19	0.001927	4e-05	A:0.000000	G:0.000001
[truncated: 266 more rows]

## Sheet: Rep1_d9_recovery
# sample ID:	L3.combined
# reads in library:	51101909	(44147880 unique UMIs)
[truncated: 415 more rows]

## Sheet: Rep1_d13_recovery
# sample ID:	L4.combined
[truncated: 416 more rows]

[truncated: 21 more sheets: Rep1_d17_recovery, Rep2_d1_baseline, Rep2_d1_recovery, Rep2_d9_recovery, Rep2_d13_recovery, Rep2_d17_recovery, Rep3_d1_baseline, Rep3_d1_recovery, Rep3_d9_recovery, Rep3_d13_recovery, Rep3_d17_recovery, Rep4_d1_baseline, Rep4_d1_recovery, Rep4_d9_recovery, Rep4_d13_recovery, Rep4_d17_recovery, Rep5_d1_baseline, Rep5_d1_recovery, Rep5_d9_recovery, Rep5_d13_recovery …]
