# Supplementary material for: Natural variation in the irld gene family affects starvation resistance in C. elegans
Source: bioRxiv preprint, doi:10.1101/2021.06.07.447366, version 2 (2022-05-11)
Supplement: Data S3 [file 447366_file04.xlsx]

## Sheet: README
Data corresponding to Figures S6 and S7 are on subsequent sheets in this file:
Webster2018_countData: count data from RNA-seq for whole fed L1s and whole starved L1 from Webster et al., 2018
Webster2018_diffExpAnalysis: results from differential expression analysis of the irld genes, plotted to generate Figure S6
Cao2017_TPM: Transcripts-per-million (TPM) plotted in Figure S7A obtained from single-cell RNA-seq data in Table S4 of Cao et al., 2017
Taylor2021_TPM: TPM plotted in Figure S7B obtained from single-cell neuronal RNA-seq data in Supplementary Table 11 (threshold 3) of Taylor et al., 2021

## Sheet: Webster2018_countData
gene	LC10_Ctrl_24hr	LC11_Ctrl_24hr	LC12_Ctrl_24hr	LC14_Ctrl_24hr	LC10_Ctrl_18hr	LC11_Ctrl_18hr	LC12_Ctrl_18hr	LC14_Ctrl_18hr
2L52.1	548	456	538	570	225	278	412	241
2RSSE.1	989	583	807	944	815	1050	1295	956
2RSSE.2	202	117	167	162	174	191	296	195
2RSSE.3	100	76	98	103	127	125	170	125
2RSSE.4	2	0	4	1	0	2	0	1
2RSSE.5	0	0	0	0	0	0	0	0
2RSSE.6	19	12	13	22	33	29	26	28
2RSSE.8	1	3	2	6	0	0	1	1
3R5.1	123	127	108	136	107	129	148	112
3R5.2	190	126	133	213	146	180	148	130
4R79.1	254	160	124	154	306	347	335	273
4R79.2	220	167	215	209	86	126	106	100
4R79.4	2	0	0	3	0	2	0	3
4R79.5	0	1	0	0	0	4	0	0
6R55.2	6	5	9	6	5	2	3	0
AC3.1	4	4	7	5	4	6	5	9
AC3.10	25	15	20	21	6	6	8	6
AC3.11	1	0	0	0	0	0	0	0
AC3.12	0	1	3	3	0	0	2	1
AC3.13	1	5	5	2	9	4	4	9
AC3.14	0	0	0	0	0	0	0	0
AC3.15	4	5	2	2	2	0	3	4
AC3.16	0	0	0	0	0	0	0	0
AC3.2	828	728	707	765	538	736	632	608
AC3.3	7	2	5	4	211	108	69	123
AC3.4	12	6	20	5	148	93	58	93
AC3.5	1425	1375	1124	1391	2002	2464	1712	2015
AC3.6	58	39	28	58	14	25	23	9
AC3.7	59	56	86	56	68	91	177	51
AC3.8	565	424	496	399	366	356	206	350
AC3.9	74	84	64	76	61	60	51	52
AC7.1	190	144	127	189	38	80	96	63
AC7.10	0	0	0	0	0	0	0	0
AC7.11	2	1	3	0	4	2	2	5
AC7.12	0	0	0	0	0	0	0	0
AC7.13	0	0	0	0	0	0	0	0
AC7.14	0	0	0	0	0	0	0	0
AC7.15	0	2	1	0	0	0	0	0
AC7.16	1	0	0	0	0	0	0	0
AC7.17	0	1	1	0	1	1	0	0
AC7.18	3	6	0	4	0	1	6	4
AC7.19	0	0	0	0	0	0	0	0
AC7.2	3063	2177	2488	2693	2385	3316	2798	2778
AC7.20	0	1	1	1	0	0	0	0
AC7.21	0	0	3	1	0	0	0	0
AC7.22	0	0	0	0	0	0	0	0
AC7.23	1	0	0	1	2	0	0	0
AC7.24	4	3	1	4	0	2	1	0
AC7.25	0	0	2	0	0	0	0	0
AC7.26	0	0	0	1	0	0	0	0
AC7.27	2	1	7	0	0	0	1	2
AC7.28	1	3	1	0	0	0	1	2
AC7.29	0	0	0	0	0	0	0	0
AC7.3	2	11	9	13	4	1	2	4
AC7.30	0	0	0	0	0	0	0	0
AC7.31	0	0	0	0	0	0	0	0
AC7.32	0	0	0	0	0	0	0	0
AC7.33	0	0	0	0	0	0	0	0
AC7.34	0	0	0	0	0	0	0	0
AC7.35	0	1	0	0	0	0	0	0
AC7.36	0	0	0	0	0	0	0	0
AC7.37	1	1	2	2	0	0	0	0
AC7.38	0	0	0	0	0	0	0	0
AC7.39	1	0	0	0	0	0	0	0
AC7.4	0	0	0	0	0	0	0	0
AC7.40	0	0	0	0	0	0	0	0
AC7.41	1	0	0	0	0	0	1	0
AC7.42	0	0	0	0	0	0	0	0
AC7.43	0	0	0	0	0	0	0	0
AC7.44	0	0	0	0	0	0	0	0
AC7.45	1	1	2	0	0	0	0	0
AC7.46	0	0	0	0	0	0	0	0
AC7.47	0	0	0	0	0	0	0	0
AC7.48	0	0	0	0	0	0	0	0
AC7.49	0	0	0	0	0	0	0	0
AC7.5	5	5	1	7	2	1	1	1
AC7.50	0	0	0	0	0	0	0	0
AC7.51	0	1	0	2	0	2	0	1
AC7.52	0	1	0	0	0	0	0	0
AC7.53	0	0	0	0	0	0	0	0
AC7.54	0	0	0	0	0	0	0	0
AC7.55	0	0	0	0	0	0	0	0
AC7.56	0	0	0	0	0	0	0	0
AC7.57	1	0	1	1	0	0	1	0
AC7.58	0	0	0	0	0	0	0	0
AC7.59	1	0	1	0	0	0	1	0
AC7.6	1	0	0	1	0	1	0	0
AC7.60	0	0	2	0	0	0	0	0
AC7.61	0	0	0	0	0	0	0	0
AC7.62	1	0	1	0	0	0	1	0
AC7.63	0	0	0	1	0	1	0	0
AC7.64	0	0	1	0	0	0	0	0
AC7.65	0	0	0	0	0	0	0	0
AC7.66	0	0	0	0	0	0	0	0
AC7.67	2	3	3	1	0	0	1	0
AC7.68	0	0	0	1	0	0	0	0
AC7.69	1	0	0	0	0	0	0	0
AC7.7	2	0	2	0	0	0	0	0
AC7.70	0	0	0	0	0	0	0	0
AC7.71	0	0	0	0	0	0	0	0
AC7.72	0	0	0	1	0	0	0	0
AC7.73	0	0	0	0	0	0	0	0
AC7.74	0	0	0	0	0	0	0	0
AC7.75	0	0	0	0	0	0	0	0
AC7.76	0	0	0	0	0	0	0	0
AC7.77	3	0	0	4	0	0	0	0
AC7.78	2	4	3	1	0	0	0	0
AC7.79	0	0	2	0	0	0	0	0
AC7.8	0	0	0	0	0	0	0	0
AC7.80	0	0	0	1	0	0	2	0
AC7.81	0	0	0	0	0	0	4	0
AC7.82	1	0	0	1	0	0	0	0
AC7.83	9	2	2	2	2	4	1	1
AC7.9	3	0	0	1	0	1	0	0
AC8.1	141	89	139	168	104	144	170	142
AC8.10	802	640	765	751	270	345	246	302
AC8.11	521	408	492	535	171	213	171	191
AC8.12	106	82	102	135	82	86	68	84
AC8.2	18	19	28	30	3	1	6	5
AC8.3	808	704	757	723	293	320	260	250
AC8.4	533	416	483	555	188	223	184	201
AC8.5	116	95	171	201	74	97	120	113
AC8.6	65	62	50	88	121	163	124	145
AC8.7	121	93	94	118	65	100	60	99
AC8.9	0	2	0	5	0	0	0	1
AH10.1	20	27	78	75	6	10	10	14
AH10.2	22	29	11	32	0	2	11	0
AH10.3	61	32	44	79	29	23	49	28
AH10.4	11	4	6	5	0	0	3	1
AH10.6	2	0	1	0	0	0	0	0
AH10.7	0	4	1	1	0	0	0	0
AH10.8	12	13	13	27	2	5	8	2
AH6.1	17	14	41	55	1	4	6	8
AH6.10	74	109	79	72	20	24	23	15
AH6.11	14	13	14	21	1	10	9	6
AH6.12	8	1	13	17	1	1	8	11
AH6.13	0	3	9	11	0	0	3	8
AH6.14	12	13	22	25	3	8	5	6
AH6.16	4	0	11	17	0	0	0	3
AH6.2	8	9	27	36	0	2	6	7
AH6.3	2	5	16	19	0	5	6	8
AH6.4	14	8	14	26	4	3	7	14
AH6.5	74	54	157	170	33	82	387	70
AH6.6	3	0	4	10	0	1	2	2
AH6.7	4	4	8	12	2	4	3	8
AH6.8	4	6	14	19	1	5	4	7
AH6.9	4	5	7	10	0	0	3	3
AH9.1	106	70	70	76	33	31	34	38
AH9.2	79	46	186	193	45	48	112	87
AH9.3	244	195	305	312	224	255	349	236
AH9.4	132	167	90	136	30	45	37	42
AH9.6	669	637	527	611	255	359	275	254
AH9.7	1	2	8	4	0	3	0	3
B0001.1	1093	787	758	965	781	1068	996	927
B0001.10	0	0	0	0	0	0	1	0
B0001.11	14	16	13	14	12	12	6	8
B0001.12	7	1	6	3	1	4	3	0
B0001.2	405	277	324	326	255	355	336	305
B0001.3	1649	1293	1287	1501	1199	1624	1142	1253
B0001.4	912	668	651	717	820	1048	859	880
B0001.5	1020	763	897	1023	714	872	804	729
B0001.6	7558	5826	6199	6777	2580	3237	3637	2704
B0001.7	277	195	238	200	147	166	282	164
B0001.8	644	466	501	571	449	552	501	436
B0001.9	0	0	0	1	0	0	0	0
B0019.1	949	722	826	905	779	900	855	830
B0019.2	818	603	731	834	374	458	502	469
B0024.1	79	37	32	56	4369	3472	2707	2608
B0024.10	349	229	263	337	331	387	338	318
B0024.11	1112	836	919	968	1209	1809	1402	1477
B0024.12	155	106	95	147	305	404	226	282
B0024.13	305	277	251	337	269	375	239	272
B0024.14	5785	4251	4402	5257	2165	3075	2443	2800
B0024.15	193	160	140	147	65	76	61	80
B0024.16	0	0	0	0	0	0	0	0
B0024.17	0	1	1	2	0	0	1	0
B0024.18	4	8	2	5	3	2	1	0
B0024.2	243	149	151	238	53	68	85	62
B0024.3	221	135	154	180	71	153	102	86
B0024.4	136	73	103	132	148	169	470	164
B0024.6	96	77	78	88	21	29	32	28
B0024.8	1057	694	687	795	281	487	436	403
B0024.9	1297	1036	909	1137	805	925	626	732
B0025.1	4325	2965	3196	3321	2002	2724	2772	2178
B0025.2	1935	1357	1396	1530	1183	1687	1690	1265
B0025.4	343	247	217	283	266	268	290	259
B0025.5	9	8	6	13	4	10	7	13
B0025.6	2	0	1	1	0	0	1	0
B0034.1	376	223	225	312	195	189	458	201
B0034.10	3	0	2	2	0	0	6	0
B0034.11	2	6	3	5	0	3	2	0
B0034.12	0	0	8	3	0	0	0	3
B0034.13	1	0	1	0	0	0	0	0
B0034.14	2	2	2	2	0	2	1	0
B0034.15	0	6	4	1	1	2	0	1
B0034.16	0	0	2	1	0	0	0	0
B0034.17	25	16	6	12	0	9	10	4
B0034.2	0	0	7	2	0	0	0	0
B0034.3	19766	14525	15003	17496	6338	8488	9369	8102
B0034.4	72	40	47	51	11	14	28	9
B0034.5	63	39	50	68	18	39	49	36
B0034.7	7	6	5	3	36	51	42	26
B0034.8	0	0	0	0	0	0	0	0
B0035.1	1301	936	1038	1318	1730	2268	1931	1815
B0035.10	7	7	0	5	6	10	7	3
B0035.11	1323	990	1012	1211	1266	1633	1375	1238
B0035.12	1482	1018	1001	1359	1660	2227	1620	1815
B0035.13	857	713	634	845	929	1677	1002	1075
B0035.14	1469	1245	1169	1370	1391	1821	1556	1458
B0035.15	415	306	297	384	658	758	500	639
B0035.16	78	74	88	84	80	97	84	91
B0035.18	31	39	20	18	27	20	21	15
B0035.19	3	3	5	6	1	3	1	1
B0035.2	308	198	229	259	1127	1299	1091	1081
B0035.3	301	195	195	225	324	398	336	309
B0035.4	742	529	507	659	1021	1455	1058	1051
B0035.5	1795	1508	1676	1634	1945	2687	2016	2157
B0035.6	326	243	267	370	247	308	467	290
B0035.7	0	2	0	0	0	0	0	1
B0035.8	1	1	0	0	0	1	0	0
B0035.9	2	2	3	5	5	6	7	9
B0041.1	2	9	4	13	1	1	6	4
B0041.10	0	0	2	0	0	0	4	1
B0041.2	8295	6599	6831	7316	5277	7356	7435	6043
B0041.3	248	240	192	196	137	219	148	135
B0041.4	143983	102979	111038	143955	121730	142531	100868	112760
B0041.5	913	751	698	798	823	1025	896	887
B0041.6	96	83	79	94	125	206	131	97
B0041.7	6524	5072	4794	5521	5534	6931	6459	5525
B0041.8	562	414	329	441	349	431	415	353
B0041.9	1	0	1	0	1	0	0	0
B0047.1	18	20	14	26	6	10	11	6
B0047.2	9	17	26	35	10	6	13	8
B0047.3	42	40	47	55	21	35	46	29
B0047.4	2	1	0	0	0	0	1	2
B0047.5	28	21	25	41	22	23	26	15
B0198.1	328	243	229	280	220	283	336	205
B0198.2	298	251	242	221	130	176	158	179
B0198.3	606	500	615	633	578	596	587	563
B0198.4	2	0	4	10	0	0	1	0
B0198.5	2	3	2	4	0	0	0	1
B0198.6	0	2	0	0	0	0	0	0
B0198.7	0	0	0	0	0	0	0	0
B0198.8	0	0	3	3	0	0	3	0
B0198.9	2	0	0	1	0	1	4	0
B0205.1	796	656	639	684	659	801	880	664
B0205.10	8	7	23	50	2	8	25	9
B0205.11	1243	921	963	1054	1518	2126	1617	1633
B0205.12	76	66	57	87	99	115	97	71
B0205.13	21	10	27	17	173	125	126	102
B0205.14	7	6	4	5	8	3	12	6
B0205.15	3	2	1	2	1	1	0	0
B0205.16	1	0	3	2	3	1	1	0
B0205.2	36	27	22	23	15	12	7	14
B0205.3	1493	1142	1246	1499	3171	3862	3217	3037
B0205.4	111	63	67	90	193	204	149	178
B0205.5	3	5	5	11	1	3	3	5
B0205.6	971	733	789	891	1434	2009	1458	1570
B0205.7	10060	7794	7605	9263	7359	9346	8100	7483
B0205.8	301	196	190	232	355	430	338	282
B0205.9	657	455	405	532	325	439	531	396
B0207.1	20	11	25	39	2	0	19	2
B0207.10	30	37	34	46	11	20	23	7
B0207.11	2	5	3	7	1	0	0	0
B0207.12	1452	1294	1177	1306	631	916	731	781
B0207.13	1	0	0	0	0	0	0	0
B0207.14	1	0	1	0	0	0	0	1
B0207.15	0	4	1	3	0	3	0	1
B0207.16	0	1	0	2	0	0	1	1
B0207.2	186	154	125	155	48	60	61	31
B0207.3	400	280	338	372	82	133	129	119
B0207.4	160	137	267	242	429	580	515	460
B0207.5	93	90	310	311	29	42	76	121
B0207.6	406	264	269	355	263	357	269	315
B0207.7	21	18	51	56	0	2	6	13
B0207.8	4	6	9	6	2	2	6	1
B0207.9	2	2	14	7	0	0	1	6
B0212.1	196	141	244	267	217	322	310	279
B0212.2	79	52	135	159	19	39	37	47
B0212.3	264	207	225	232	194	241	193	200
B0212.4	306	187	231	268	187	254	186	173
B0212.5	722	411	540	680	205	310	316	300
B0212.6	27	29	35	50	44	34	47	31
B0212.7	1	1	6	1	0	0	0	3
B0212.8	2	0	1	2	0	0	0	0
B0212.9	2	2	5	7	0	0	2	1
B0212.t1	0	0	0	0	0	0	0	0
B0213.10	122	106	93	119	19	24	39	19
B0213.11	119	110	113	122	36	48	56	33
B0213.12	53	25	47	60	3	10	30	10
B0213.14	389	340	326	421	116	182	126	135
B0213.15	433	345	306	432	90	129	239	81
B0213.16	124	94	95	105	6	9	80	7
B0213.17	495	139	232	287	434	425	1195	239
B0213.18	0	0	0	0	0	0	0	0
B0213.19	2	0	0	0	0	0	1	0
B0213.2	657	432	380	590	215	244	487	121
B0213.20	0	0	0	0	0	0	0	0
B0213.21	0	0	0	0	0	0	0	0
B0213.22	0	0	0	0	0	0	0	0
B0213.23	0	0	0	0	0	0	0	0
B0213.24	0	0	0	0	0	0	0	0
B0213.25	0	1	0	1	0	0	0	0
B0213.3	391	391	330	399	67	67	217	67
B0213.4	1214	766	889	1022	885	976	3656	576
B0213.5	233	156	162	189	529	560	1049	334
B0213.6	889	456	443	576	705	710	1123	532
B0213.7	1	4	3	3	1	0	10	2
B0213.8	2	1	6	13	5	0	12	2
B0213.9	4	9	5	16	0	0	6	2
B0218.1	4462	3609	3446	4146	1280	1877	1504	1583
B0218.2	2232	1483	1310	1968	917	1395	1645	1099
B0218.3	1257	955	1086	1114	752	1023	1023	835
B0218.5	98	53	66	111	20	16	18	26
B0218.6	591	416	415	502	463	641	402	455
B0218.7	5	4	20	13	0	0	1	5
B0218.8	972	791	1064	862	301	483	392	250
B0218.9	2	6	0	0	1	0	2	2
B0222.1	582	363	371	519	125	196	173	176
B0222.10	5	7	5	21	1	2	7	7
B0222.11	143	117	86	119	66	91	59	87
B0222.12	0	0	1	0	1	0	0	0
B0222.13	0	0	0	0	0	0	0	0
B0222.14	6	2	5	12	0	2	5	1
B0222.2	13	7	10	11	2	2	3	3
B0222.3	544	463	412	469	261	305	293	249
B0222.4	167	95	103	137	99	90	132	112
B0222.5	264	202	234	293	173	180	175	126
B0222.6	10227	6544	6975	11379	20604	26409	16401	18834
B0222.7	19	17	37	53	34	52	91	44
B0222.8	12138	7604	7894	13137	23340	30143	18810	21770
B0222.9	1725	1213	1224	1543	454	556	544	419
B0228.1	293	275	186	254	125	167	128	145
B0228.4	21813	17347	17754	19142	13272	17635	17838	15597
B0228.5	43	30	49	49	5	17	21	14
B0228.6	295	239	264	280	68	86	314	82
B0228.7	1515	1228	1064	1225	1540	2016	1340	1586
B0228.8	7	11	14	5	1	2	4	3
B0228.9	13	18	21	15	6	3	8	7
B0228.t1	0	0	0	2	0	0	0	0
B0238.1	1008	783	790	864	176	327	418	249
B0238.10	3591	3108	3123	3558	1551	2262	1924	1720
B0238.11	1474	977	958	1275	1641	2267	1928	1681
B0238.12	575	372	426	516	161	217	314	189
B0238.13	308	176	110	260	11	19	63	14
B0238.14	0	2	2	4	0	0	0	0
B0238.15	3	6	12	7	0	1	3	1
B0238.16	0	0	0	0	0	0	0	0
B0238.17	0	0	0	0	0	0	0	0
B0238.18	0	0	0	0	0	0	0	0
B0238.3	3	4	7	9	2	3	5	0
B0238.5	2	4	1	2	0	1	2	0
B0238.6	11	14	22	14	2	3	6	8
B0238.7	12	8	8	24	3	3	6	3
B0238.8	25	31	27	31	9	20	14	3
B0238.9	88	76	129	121	91	69	137	88
B0240.1	333	223	204	250	153	173	115	164
B0240.2	5	3	16	20	11	10	10	4
B0240.3	744	678	491	546	289	437	398	361
B0240.4	711	483	619	642	1151	1496	1320	1223
B0240.5	0	0	0	0	0	0	0	0
B0240.6	1	0	1	1	0	0	4	3
B0244.10	247	211	169	192	194	238	120	200
B0244.11	2	4	5	3	2	0	3	0
B0244.13	0	0	0	0	0	0	0	0
B0244.14	4	4	3	7	1	0	2	2
B0244.2	18727	13494	14462	17118	4266	5862	6006	5537
B0244.4	19	10	29	16	9	13	11	22
B0244.5	138	116	91	120	37	66	52	52
B0244.6	121	89	90	155	59	51	74	71
B0244.7	7	2	6	11	24	33	18	46
B0244.8	58	74	73	88	49	45	68	49
B0244.9	2	7	6	10	0	0	3	1
B0244.t1	0	0	0	0	0	0	0	0
B0244.t2	0	0	0	0	0	0	0	0
B0244.t3	0	0	0	1	0	0	0	0
B0250.1	70041	50484	53427	70381	61060	70851	48769	55405
B0250.10	2	3	13	12	2	0	6	2
B0250.11	2	13	5	9	2	0	3	0
B0250.12	540	414	438	453	170	244	301	166
B0250.14	0	2	0	2	0	0	0	0
B0250.15	7	3	6	6	4	3	9	2
B0250.16	0	1	0	0	0	1	3	1
B0250.17	0	3	1	4	0	0	0	2
B0250.2	325	224	237	293	169	204	198	181
B0250.3	24483	17903	18365	24457	21842	25513	17297	19841
B0250.4	462	348	441	419	111	212	314	181
B0250.5	1675	1365	1368	1543	2152	2874	1942	2189
B0250.6	2	1	13	13	0	0	3	1
B0250.7	35	30	47	36	18	22	22	30
B0250.8	8	20	8	9	2	5	4	6
B0250.9	1118	856	945	1113	348	503	418	462
B0252.1	329	239	170	234	242	350	249	314
B0252.10	0	0	0	0	0	0	0	0
B0252.2	156	116	154	162	162	179	178	173
B0252.3	665	587	642	702	406	512	364	445
B0252.4	172	96	107	134	141	199	172	135
B0252.5	20	13	23	27	31	27	25	35
B0252.8	164	141	122	161	87	103	62	69
B0252.9	0	0	0	0	0	0	0	0
B0261.1	2166	1586	1634	1889	1224	1609	1699	1329
B0261.2	8034	5935	6638	7199	4872	7038	6631	6062
B0261.4	1084	787	785	943	1078	1506	1004	1206
B0261.5	0	1	2	3	0	2	2	1
B0261.6	8	9	23	19	1	0	27	8
B0261.7	93	100	119	115	161	208	219	184
B0261.8	269	227	205	225	472	599	551	507
B0261.9	3	3	7	7	0	0	0	0
B0272.1	697	472	691	619	512	655	989	664
B0272.2	79	66	65	82	149	168	145	165
B0272.3	1377	965	1080	1302	2627	2967	2543	2466
B0272.4	234	125	217	224	450	580	692	423
B0273.1	32	18	34	23	2	5	16	4
B0273.10	0	0	0	0	0	0	0	0
B0273.100	0	0	0	0	0	0	0	0
B0273.101	0	0	0	0	0	0	0	0
B0273.102	0	0	0	0	0	0	0	0
B0273.103	0	0	0	2	0	0	0	0
B0273.104	0	0	0	0	0	0	0	0
B0273.105	0	0	0	0	0	1	2	0
B0273.106	0	0	0	0	0	1	1	0
B0273.107	1	0	0	2	0	0	3	0
B0273.108	0	1	0	0	0	0	0	0
B0273.109	0	0	0	0	0	0	0	0
B0273.11	0	0	0	0	0	0	0	0
B0273.110	0	0	0	0	0	0	0	0
B0273.111	0	0	3	3	0	0	1	0
B0273.112	0	3	0	2	0	1	0	0
B0273.113	4	0	6	1	0	0	0	0
B0273.114	1	0	0	2	0	0	0	0
B0273.12	3	1	0	4	0	0	0	0
B0273.13	1	0	0	0	0	0	2	1
B0273.14	0	1	0	4	0	1	0	2
B0273.15	0	0	0	0	0	0	0	0
B0273.16	0	0	0	2	0	0	0	0
B0273.17	0	0	0	0	0	0	0	0
B0273.18	0	0	0	0	0	0	0	0
B0273.19	1	0	3	0	0	0	0	1
B0273.2	13	5	22	15	4	2	22	6
B0273.20	0	0	0	0	0	0	0	0
B0273.21	0	0	0	0	0	0	0	0
B0273.22	0	0	0	0	0	0	0	0
B0273.23	0	0	0	2	0	0	1	0
B0273.24	0	0	0	0	0	0	0	0
B0273.25	1	0	4	1	0	0	0	0
B0273.26	0	0	0	0	0	0	3	0
B0273.27	0	2	3	0	0	0	0	1
B0273.28	0	0	0	0	0	0	0	0
B0273.29	0	0	0	1	1	0	0	0
B0273.3	1	2	2	6	3	6	2	2
B0273.30	0	0	0	0	0	0	0	0
B0273.31	0	0	0	0	0	0	0	0
B0273.32	0	0	0	1	0	0	2	0
B0273.33	0	0	0	1	0	0	0	0
B0273.34	0	0	0	0	0	0	0	0
B0273.35	0	0	0	0	0	0	0	0
B0273.36	0	0	0	0	0	0	0	0
B0273.37	2	2	1	3	0	0	3	0
B0273.38	0	0	0	0	0	0	0	0
B0273.39	0	0	0	0	0	0	0	0
B0273.4	1312	1012	1028	1110	833	1096	1288	996
B0273.40	0	0	0	0	0	0	0	0
B0273.41	0	0	0	0	0	0	0	0
B0273.42	0	0	0	0	0	0	0	0
B0273.43	0	0	0	0	0	0	0	0
B0273.44	0	0	0	0	0	0	0	0
B0273.45	0	0	0	0	0	0	0	0
B0273.46	0	0	0	0	0	0	0	0
B0273.47	0	0	0	0	0	0	0	0
B0273.48	0	0	0	0	0	0	0	0
B0273.49	0	1	1	0	0	0	0	3
B0273.5	0	0	0	0	0	0	0	0
B0273.50	0	0	0	0	0	0	0	0
B0273.51	0	0	2	0	0	0	0	0
B0273.52	0	0	0	0	0	0	0	1
B0273.53	0	0	0	0	0	0	2	0
B0273.54	0	0	0	0	0	0	0	0
B0273.55	0	0	0	0	0	0	0	0
B0273.56	4	0	0	0	0	1	0	0
B0273.57	0	0	0	0	0	0	0	0
B0273.58	1	0	0	0	0	0	0	0
B0273.59	0	0	0	0	0	0	0	0
B0273.6	0	0	0	0	0	0	0	0
B0273.60	0	0	0	3	0	0	0	0
B0273.61	0	0	0	0	0	0	0	0
B0273.62	0	0	1	0	0	0	0	0
B0273.63	1	1	3	2	0	0	0	1
B0273.64	0	0	0	0	0	0	0	0
B0273.65	0	0	0	0	0	0	0	0
B0273.66	0	0	0	0	0	0	0	0
B0273.67	0	0	0	0	0	0	0	0
B0273.68	0	0	0	1	0	0	0	0
B0273.69	0	1	0	0	0	0	0	0
B0273.7	0	0	1	0	0	0	0	0
B0273.70	0	0	0	0	0	0	0	0
B0273.71	0	0	0	0	0	0	0	0
B0273.72	0	0	1	0	0	0	0	0
B0273.73	0	0	0	0	0	0	0	0
B0273.74	0	0	0	0	0	0	0	0
B0273.75	0	0	0	0	0	0	0	0
B0273.76	0	1	1	3	0	0	2	0
B0273.77	0	0	0	1	0	0	0	0
B0273.78	0	2	1	1	0	2	1	0
B0273.79	0	0	0	0	0	0	1	0
B0273.8	0	0	0	0	0	0	0	0
B0273.80	0	0	0	0	0	0	0	0
B0273.81	0	0	1	4	0	1	0	2
B0273.82	0	0	4	0	0	0	1	0
B0273.83	1	1	0	0	0	0	0	0
B0273.84	1	0	1	0	0	0	2	0
B0273.85	0	0	0	0	0	0	0	0
B0273.86	0	0	0	0	0	0	0	0
B0273.87	0	0	0	0	0	0	0	2
B0273.88	0	0	0	0	0	0	0	0
B0273.89	0	0	0	0	0	0	0	0
B0273.9	0	0	0	0	0	0	0	0
B0273.90	0	0	0	0	0	0	0	0
B0273.91	0	0	0	0	0	0	0	0
B0273.92	0	2	1	1	0	2	1	1
B0273.93	2	0	0	0	0	0	0	1
B0273.94	0	0	0	0	0	0	0	0
B0273.95	0	2	1	1	0	0	0	1
B0273.96	0	0	0	0	0	0	0	0
B0273.97	0	0	0	0	0	0	0	0
B0273.98	6	0	4	1	0	1	0	1
B0273.99	0	0	3	1	0	0	0	0
B0280.1	850	596	569	770	859	1069	854	792
B0280.10	187	135	159	143	182	229	175	153
B0280.11	5	7	4	22	0	0	13	1
B0280.12	314	235	251	281	198	280	271	231
B0280.13	793	494	601	733	294	377	364	345
B0280.14	0	1	0	0	0	0	1	0
B0280.15	0	1	0	1	0	0	0	0
B0280.16	0	0	0	2	0	0	0	0
B0280.17	252	221	179	228	161	223	147	219
B0280.18	0	0	0	0	0	0	0	0
B0280.2	76	54	71	82	42	45	54	37
B0280.20	0	1	1	1	0	0	0	0
B0280.3	3361	2553	2337	2959	1532	1998	1407	1545
B0280.4	36	15	19	10	50	67	47	43
B0280.5	129	113	107	110	96	116	128	96
B0280.6	0	0	0	0	0	0	0	0
B0280.7	3	14	20	8	529	622	615	483
B0280.8	1854	1438	1320	1572	734	1071	973	892
B0280.9	991	700	719	809	1075	1762	1284	1409
B0281.1	5	6	1	13	0	0	1	0
B0281.3	514	439	382	463	265	397	296	295
B0281.4	8	11	27	30	0	3	11	5
B0281.5	13	10	67	30	2	12	164	7
B0281.6	41	34	42	60	8	20	12	10
B0281.7	2	12	12	15	1	0	5	0
B0281.8	2	5	2	3	0	0	3	0
B0284.1	278	192	156	239	28	52	218	41
B0284.2	113	70	103	104	17	35	232	32
B0284.3	143	79	117	143	100	123	179	93
B0284.4	12	7	10	5	4	9	25	1
B0284.5	68	79	59	81	5	5	9	0
B0284.6	0	0	0	0	0	0	0	0
B0284.7	0	0	0	2	0	0	0	0
B0285.1	1513	1114	1291	1403	1345	1655	1406	1425
B0285.10	75	51	83	67	80	108	63	89
B0285.11	33	30	77	103	9	6	22	40
B0285.12	9	25	16	38	10	11	14	17
B0285.13	45	40	26	50	15	26	24	23
B0285.14	0	0	0	0	0	0	0	0
B0285.15	3	9	4	10	1	1	0	5
B0285.16	0	1	1	1	0	0	2	1
B0285.3	315	262	257	267	218	315	290	203
B0285.4	557	430	476	544	648	851	608	614
B0285.5	769	607	747	788	795	974	925	834
B0285.6	144	163	211	184	89	116	100	121
B0285.7	1715	1280	1396	1716	1233	1622	2152	1348
B0285.8	332	286	250	248	295	401	249	344
B0285.9	244	153	161	216	184	237	325	220
B0285.t1	0	0	0	0	0	0	0	0
B0286.1	902	573	577	782	314	366	368	289
B0286.2	1255	893	959	1210	664	763	1038	735
B0286.3	707	549	487	669	1236	1566	1119	1259
B0286.4	5478	3831	4021	4891	3879	5163	4604	4008
B0286.5	81	73	75	73	21	13	29	17
B0286.6	3	1	13	14	1	1	10	1
B0286.9	0	0	0	2	0	0	1	0
B0294.1	261	209	188	319	252	314	185	249
B0294.3	16	10	6	15	4	9	5	3
B0302.1	1956	1352	1702	1900	1274	1724	2108	1510
B0302.2	3	2	6	3	2	2	4	1
B0302.4	9	3	9	6	3	4	3	0
B0302.5	633	446	375	522	356	481	397	382
B0302.7	0	0	4	2	0	0	2	0
B0303.11	1057	867	820	983	617	801	591	738
B0303.14	372	270	234	254	219	307	286	241
B0303.15	1187	943	893	1060	2102	3102	1879	2271
B0303.16	34	27	30	19	23	54	45	35
B0303.17	0	0	0	0	0	0	1	0
B0303.2	168	137	149	171	328	411	402	286
B0303.3	2034	1367	1470	1806	3607	4350	4293	3750
B0303.4	2077	1415	1525	1695	883	1233	1326	1035
B0303.7	1537	937	1092	1277	805	1089	2020	912
B0303.8	16	21	12	16	6	14	56	10
B0303.9	1003	679	670	792	578	841	647	668
B0304.1	0	0	0	0	0	0	0	0
B0304.10	0	0	0	0	0	0	0	0
B0304.2	59	50	59	57	47	62	64	60
B0304.3	111	109	173	189	204	239	267	201
B0304.4	31	25	29	30	9	16	15	2
B0304.5	17	8	10	17	5	1	12	11
B0304.6	25	31	31	44	10	7	11	19
B0304.7	30	23	49	62	3	4	27	16
B0304.8	2	5	3	17	2	2	1	3
B0304.9	17	20	44	25	5	15	8	13
B0310.1	731	694	610	751	527	707	595	617
B0310.10	0	0	0	0	0	0	0	0
B0310.11	4	2	9	19	0	6	6	4
B0310.2	330	204	237	318	249	325	303	244
B0310.3	153	126	111	157	113	108	81	81
B0310.5	641	750	552	2076	2025	3089	2212	2101
B0310.6	15	4	5	8	100	95	91	84
B0310.8	1	0	4	3	0	0	0	0
B0310.9	2	4	2	2	3	0	0	1
B0331.1	7	16	15	19	13	14	29	20
B0331.2	10	6	22	24	45	46	31	48
B0334.1	1955	1606	1450	1985	2181	2968	2423	2157
B0334.10	4	6	7	12	2	4	15	4
B0334.11	891	639	675	852	675	766	651	641
B0334.12	7	14	10	12	3	7	2	7
B0334.13	25	12	17	21	88	89	67	80
B0334.14	0	0	0	0	0	0	0	0
B0334.15	2	0	5	1	6	11	7	0
B0334.16	0	1	0	0	0	0	1	2
B0334.17	2	0	0	0	0	1	3	1
B0334.18	0	2	0	1	0	0	1	0
B0334.19	0	0	0	0	0	1	0	1
B0334.2	642	498	407	552	98	117	110	122
B0334.3	6327	4445	5122	6605	4948	6532	5460	4913
B0334.4	593	493	486	520	503	665	606	506
B0334.5	0	0	0	0	0	0	0	0
B0334.6	158	106	135	141	200	273	250	245
B0334.7	68	57	53	58	15	20	35	9
B0334.8	1703	1195	1319	1516	1017	1257	1103	1086
B0334.9	1	3	5	7	1	0	5	0
B0336.1	1233	919	921	949	837	1088	979	996
B0336.10	54082	37252	37487	49563	47804	57307	39204	43670
B0336.11	2400	1735	1510	2027	996	1345	943	1116
B0336.12	17	15	12	12	0	2	3	3
B0336.13	216	151	148	146	198	247	197	172
B0336.15	0	0	0	0	0	0	0	0
B0336.16	1	3	0	0	0	1	2	0
B0336.2	8545	6748	6943	7967	17096	20741	16608	16725
B0336.3	4894	3050	3248	3960	3380	4565	4188	3788
B0336.4	487	402	423	423	546	628	643	532
B0336.5	336	259	223	275	244	345	246	251
B0336.6	946	691	767	913	781	1021	987	763
B0336.7	302	265	285	324	225	270	235	224
B0336.8	270	152	197	231	121	162	151	147
B0336.9	1935	1534	1676	1761	1889	2645	1721	2140
B0344.1	3	0	3	0	0	0	1	2
B0344.2	139	115	286	347	620	685	763	678
B0344.3	0	3	0	0	0	0	0	0
B0344.4	0	0	0	0	0	0	0	0
B0344.5	0	0	2	3	0	0	0	0
B0344.t1	0	0	0	0	0	0	0	0
B0344.t2	0	0	0	0	0	0	0	0
B0344.t3	0	0	0	0	0	0	0	0
B0348.1	1	1	6	4	1	1	5	0
B0348.2	31	13	34	28	17	26	35	27
B0348.4	11603	8240	9374	10425	4857	7083	6927	5933
B0348.5	8	4	13	14	252	262	229	170
B0348.6	1315	906	985	1313	1917	2313	1669	1841
B0348.7	5	0	2	1	0	0	3	1
B0350.10	0	0	1	1	0	0	0	0
B0350.11	8	2	6	5	2	10	8	3
B0350.12	0	0	0	0	0	0	0	0
B0350.13	2	0	1	0	0	0	1	0
B0350.14	0	3	2	5	0	0	3	2
B0350.15	0	0	0	0	0	0	0	0
B0350.16	0	0	0	0	0	0	1	0
B0350.17	1	1	2	1	0	0	0	1
B0350.18	6	4	4	5	2	4	4	4
B0350.19	0	0	0	0	0	0	0	0
B0350.2	45844	34182	37725	40841	24412	31578	35993	28997
B0350.20	0	0	1	0	0	0	0	0
B0350.21	0	0	0	0	0	0	0	0
B0350.22	0	0	0	0	0	0	0	0
B0350.23	0	0	0	0	0	4	1	0
B0350.24	0	0	1	2	0	0	0	0
B0350.25	1	1	0	0	0	0	0	0
B0350.26	0	0	0	0	0	0	0	0
B0350.27	0	0	0	0	0	0	0	0
B0350.28	0	0	0	0	0	0	0	0
B0350.29	2	0	0	0	0	0	0	0
B0350.3	1	0	2	2	0	0	1	0
B0350.30	0	0	0	0	0	0	0	0
B0350.31	0	0	0	0	0	0	0	0
B0350.32	0	0	0	0	0	0	0	0
B0350.33	0	0	0	0	0	0	0	0
B0350.34	0	0	3	2	0	0	0	0
B0350.35	0	0	0	0	0	0	0	0
B0350.36	0	0	0	0	0	0	0	0
B0350.37	0	0	0	0	0	0	0	0
B0350.38	0	0	0	0	0	0	0	0
B0350.39	0	1	0	0	0	0	0	0
B0350.4	0	0	1	2	0	0	0	1
B0350.40	3	3	6	4	2	2	3	4
B0350.41	0	0	0	0	0	0	0	0
B0350.42	1	0	5	7	0	0	1	0
B0350.43	1	0	0	0	0	0	0	0
B0350.44	0	0	2	1	0	1	2	0
B0350.45	0	0	0	0	0	0	0	0
B0350.46	0	0	0	0	0	0	0	0
B0350.47	0	0	0	0	0	0	0	0
B0350.48	2	1	0	0	0	0	0	3
B0350.49	0	0	0	0	0	0	0	0
B0350.5	0	0	0	3	0	0	2	0
B0350.50	0	0	0	0	0	0	0	0
B0350.51	0	0	0	0	0	0	0	0
B0350.52	0	0	0	0	0	0	0	0
B0350.53	1	0	0	1	0	1	0	0
B0350.54	0	0	0	0	0	0	0	0
B0350.55	0	0	0	1	0	0	2	0
B0350.56	0	0	0	1	0	0	1	0
B0350.57	0	0	0	0	0	0	0	0
B0350.58	1	3	3	9	0	0	2	1
B0350.59	0	0	0	0	0	0	0	0
B0350.6	0	0	0	0	0	0	0	0
B0350.60	0	0	0	0	0	0	0	0
B0350.61	0	0	0	0	0	0	0	0
B0350.62	0	1	2	1	4	1	1	0
B0350.63	0	0	0	0	0	0	0	0
B0350.64	0	1	2	1	0	0	0	0
B0350.65	0	1	3	3	0	1	1	1
B0350.66	0	3	1	2	0	0	1	0
B0350.67	0	0	1	0	0	0	0	0
B0350.68	0	0	1	3	0	0	1	0
B0350.69	0	3	5	4	0	0	5	1
B0350.7	0	0	0	0	0	0	0	0
B0350.70	0	1	0	1	0	0	0	3
B0350.71	1	0	0	0	0	0	0	0
B0350.72	7	4	14	27	0	0	3	3
B0350.73	4	3	0	2	0	0	1	2
B0350.74	3	5	0	0	1	2	0	0
B0350.75	3	2	10	17	0	2	7	9
B0350.76	3	3	2	5	1	1	2	2
B0350.77	1	1	0	0	0	0	0	0
B0350.78	1	5	2	5	0	1	1	0
B0350.79	6	0	2	7	0	0	1	0
B0350.8	0	0	0	0	0	0	0	0
B0350.80	1	5	9	7	0	0	3	3
B0350.81	1	0	0	1	0	0	0	0
B0350.82	0	0	1	0	0	0	0	0
B0350.83	0	0	0	0	0	0	0	0
B0350.84	0	0	2	0	0	0	0	0
B0350.9	0	0	0	0	0	0	0	0
B0350.t1	0	0	0	0	0	0	0	0
B0353.1	40	22	27	26	15	35	44	28
B0353.2	2	0	3	5	0	0	2	1
B0361.10	1657	1221	1205	1347	1309	1688	1586	1442
B0361.11	8	14	10	20	1	9	7	8
B0361.2	1025	748	722	916	615	739	683	636
B0361.3	779	625	566	694	885	1034	847	947
B0361.4	548	442	328	473	146	247	271	228
B0361.5	2406	1780	1723	2235	1178	1261	1350	1038
B0361.6	643	504	480	533	803	1317	841	1017
B0361.7	1127	1022	1055	1073	688	852	807	656
B0361.8	1031	817	778	982	692	1033	873	891
B0361.9	2512	1914	1756	2354	683	997	783	852
B0365.1	1027	811	841	1059	1338	1439	1289	1338
B0365.2	5	1	8	11	0	4	2	4
B0365.3	66416	50166	55260	64285	48903	65129	57028	55406
B0365.5	89	65	73	82	693	764	504	626
B0365.6	1664	920	952	1578	1811	2392	1976	1892
B0365.7	259	205	238	178	127	148	190	130
B0365.8	0	1	0	1	0	0	0	1
B0379.1	1868	1409	1228	1717	455	536	511	381
B0379.10	13	13	42	48	1	1	19	16
B0379.11	0	1	2	2	1	0	0	1
B0379.2	17	14	10	21	0	1	3	4
B0379.3	2623	2134	2305	2484	1520	1885	1754	1679
B0379.4	4330	3239	3446	4054	1533	2073	1749	1704
B0379.6	18	21	55	82	1	3	32	24
B0379.7	92	65	58	120	2	4	18	4
B0379.8	0	0	0	2	0	0	0	1
B0379.9	10	11	9	26	1	0	3	3
B0391.1	1	2	6	4	0	0	2	0
B0391.10	67	52	30	88	22	49	63	34
B0391.11	781	550	489	610	82	174	189	135
B0391.12	2	1	0	3	0	0	2	1
B0391.13	0	0	0	0	0	0	0	0
B0391.3	0	3	3	2	0	0	0	0
B0391.4	8	12	11	15	0	3	5	2
B0391.5	362	215	282	296	89	118	171	92
B0391.6	62	42	57	92	8	24	31	13
B0391.8	52	41	65	79	25	32	106	44
B0391.9	2	11	12	18	0	1	10	4
B0393.1	95063	67419	69397	91905	88846	106548	74968	85710
B0393.10	0	0	1	2	0	0	0	0
B0393.11	0	0	0	0	0	0	0	0
B0393.12	1	0	0	1	0	2	2	0
B0393.13	0	0	0	1	0	0	0	0
B0393.14	2	2	0	0	3	3	2	1
B0393.15	0	0	0	0	0	0	1	0
B0393.16	0	0	0	0	0	0	0	0
B0393.2	1109	788	794	926	1011	1349	1166	1152
B0393.3	347	241	309	334	644	789	1012	680
B0393.4	3	8	9	25	29	22	20	21
B0393.5	51	89	168	105	730	835	1119	737
B0393.6	41	41	44	42	42	37	100	31
B0393.7	45	39	29	51	26	28	22	17
B0393.8	1	1	1	1	0	0	1	0
B0393.9	513	491	353	488	95	133	129	123
B0395.1	82	68	84	80	118	143	156	142
B0395.10	1	0	1	0	0	0	0	0
B0395.2	233	248	242	284	753	867	718	703
B0395.3	1996	1415	1512	1891	1521	1731	1563	1433
B0395.5	0	0	0	0	0	0	0	0
B0395.6	0	0	0	0	0	0	0	0
B0395.7	0	2	4	5	0	0	3	1
B0395.8	0	2	0	1	0	0	1	1
B0395.t1	0	0	0	0	0	0	0	0
B0399.1	2209	1485	1678	2135	814	1160	771	879
B0399.2	20	14	53	68	332	345	364	298
B0399.3	7	1	6	5	2	3	3	4
B0399.t1	0	2	3	4	0	0	2	2
B0399.t10	13	13	7	5	4	10	2	3
B0399.t11	7	2	7	8	0	1	4	7
B0399.t12	1	2	5	6	0	0	3	1
B0399.t13	1	2	1	5	2	1	0	0
B0399.t14	1	1	2	4	0	0	4	0
B0399.t15	2	4	8	8	0	2	2	1
B0399.t16	5	1	4	5	0	0	1	1
B0399.t2	1	1	7	4	0	0	2	2
B0399.t3	3	1	2	6	0	7	0	1
B0399.t4	0	1	4	1	0	1	0	2
B0399.t5	0	4	9	6	0	1	2	5
B0399.t6	9	12	11	21	3	4	1	1
B0399.t7	9	12	4	21	3	9	3	1
B0399.t8	6	12	13	15	1	6	5	8
B0399.t9	11	5	5	11	1	6	3	4
B0403.10	4	2	2	2	0	0	3	0
B0403.11	1	6	3	8	5	0	4	2
B0403.12	0	0	0	2	0	0	0	0
B0403.13	0	0	0	5	0	0	0	0
B0403.2	366	288	335	395	188	282	237	246
B0403.3	19	16	40	35	32	30	53	44
B0403.4	5365	3453	4082	4695	19628	21774	17605	18016
B0403.5	70	61	99	72	725	874	962	638
B0403.6	108	94	106	104	49	55	61	47
B0403.7	0	0	2	2	0	0	3	0
B0403.8	0	0	2	0	0	0	1	0
B0403.9	1	1	4	2	1	4	2	2
B0410.1	3	2	1	3	0	0	1	2
B0410.2	255	155	229	256	417	421	606	372
B0410.3	816	677	610	719	307	420	280	448
B0410.4	0	0	0	3	0	1	0	0
B0412.1	166	165	84	127	92	112	101	121
B0412.2	4789	3233	3569	4230	1658	2061	1562	1747
B0412.3	1940	1450	1603	1868	1667	2437	1892	1957
B0412.4	11249	8227	8129	11382	10710	11826	8254	9197
B0412.6	5	3	0	3	5	2	2	8
B0412.7	17	19	11	16	6	17	7	13
B0412.8	0	0	0	0	0	0	0	0
B0414.1	6	5	4	5	3	12	3	6
B0414.10	0	2	4	1	0	0	0	1
B0414.11	7	0	3	2	0	3	0	2
B0414.12	0	1	1	4	0	0	0	1
B0414.2	312	217	204	278	111	128	142	114
B0414.3	327	243	318	446	720	721	928	616
B0414.5	44	50	90	80	130	146	257	152
B0414.6	234	187	209	259	94	143	219	116
B0414.7	3440	2711	2783	2924	2369	3114	2778	2691
B0414.8	997	748	734	849	862	1087	976	904
B0414.9	0	0	0	0	0	0	0	0
B0416.1	979	719	800	871	782	1090	968	960
B0416.2	4	1	2	12	3	1	0	1
B0416.3	134	82	76	118	41	50	53	46
B0416.4	4	3	8	18	4	4	28	11
B0416.5	3435	2538	3219	3336	4106	5307	5051	4465
B0416.6	757	561	523	683	820	1044	796	873
B0416.7	45	45	43	64	31	21	36	21
B0416.8	2	3	0	0	0	0	2	1
B0416.9	0	2	2	0	0	0	2	0
B0432.1	5	11	9	15	5	4	10	4
B0432.10	293	259	197	248	131	159	199	134
B0432.11	1	3	12	20	1	2	9	6
B0432.12	4	2	8	10	0	0	10	0
B0432.13	169	164	115	140	102	123	107	84
B0432.14	801	573	532	750	144	186	162	153
B0432.15	1	1	0	0	0	0	1	0
B0432.17	1	1	2	1	0	2	1	0
B0432.18	0	0	0	0	0	1	0	2
B0432.19	0	1	0	0	0	0	0	0
B0432.2	847	645	582	843	607	677	635	557
B0432.3	3061	2582	2247	2805	1080	1495	965	1130
B0432.4	2608	2186	1938	2367	1384	1736	1405	1385
B0432.5	173	154	145	179	84	127	123	106
B0432.6	294	209	208	280	186	239	217	218
B0432.7	294	247	268	322	211	274	316	234
B0432.8	16	7	3	12	10	8	7	6
B0432.9	111	113	88	138	83	112	83	98
B0454.1	442	330	363	449	164	248	333	233
B0454.10	81	62	42	65	15	17	32	10
B0454.11	0	0	0	0	0	0	0	1
B0454.12	0	0	0	0	0	0	1	0
B0454.13	0	2	1	0	0	0	0	0
B0454.14	0	0	2	0	0	0	1	0
B0454.15	0	0	0	0	0	0	0	0
B0454.17	4	0	0	1	0	1	0	1
B0454.18	13	11	4	13	1	2	3	1
B0454.2	59	42	65	60	4	14	19	12
B0454.20	0	0	0	0	0	0	0	0
B0454.21	0	0	1	1	1	0	0	0
B0454.22	0	0	0	0	0	0	0	0
B0454.24	0	0	0	0	0	0	0	0
B0454.25	0	0	0	1	0	0	1	0
B0454.3	40	22	15	34	3	2	12	7
B0454.4	54	44	37	38	8	13	23	9
B0454.5	53	48	44	71	79	85	49	44
B0454.6	726	455	515	623	274	345	328	324
B0454.7	26	22	56	80	6	3	11	13
B0454.8	20	7	11	30	4	6	10	3
B0454.9	765	490	563	689	219	316	345	236
B0457.1	4401	3234	3611	3981	1992	2726	2839	2379
B0457.10	0	0	0	0	0	0	0	0
B0457.11	0	0	0	1	0	0	0	0
B0457.12	1	2	0	4	0	0	1	1
B0457.13	1	0	0	0	1	0	0	0
B0457.14	0	0	0	0	0	0	0	0
B0457.15	0	0	0	0	0	0	0	0
B0457.16	31	21	28	26	3	8	10	9
B0457.17	2	0	0	0	0	0	0	0
B0457.18	0	0	2	0	0	0	2	0
B0457.19	7	8	14	7	0	8	7	3
B0457.2	930	715	772	818	410	527	669	340
B0457.3	1	4	2	8	0	2	1	1
B0457.4	12	22	12	12	2	0	5	3
B0457.6	370	249	192	310	178	216	255	214
B0457.7	0	0	0	0	0	1	2	0
B0457.8	0	0	0	1	0	0	0	0
B0457.9	2	0	3	3	0	1	0	1
B0462.1	293	192	161	240	8	11	24	10
B0462.2	8	6	15	18	0	1	11	6
B0462.3	1	5	12	3	0	3	66	4
B0462.4	4	2	7	6	13	12	28	4
B0462.5	68	51	40	95	4	2	5	3
B0464.1	3392	2431	2778	3218	5916	7426	6013	6150
B0464.2	3343	2476	2747	3114	2865	3940	4055	3319
B0464.3	1425	1040	908	1441	1405	1753	1122	1290
B0464.4	1241	855	841	1080	902	1217	1047	1014
B0464.5	13010	9122	9514	11432	7760	10353	8754	8607
B0464.6	904	605	729	759	945	1188	1183	1005
B0464.7	1064	756	744	790	2010	2566	2301	1936
B0464.8	267	219	192	221	195	278	305	246
B0464.9	335	280	293	327	310	412	374	360
B0478.1	1060	779	785	906	393	624	516	540
B0478.10	4	6	2	1	0	3	0	1
B0478.11	0	1	0	0	0	0	0	0
B0478.12	12	7	5	4	3	6	4	4
B0478.13	0	0	1	0	0	0	0	0
B0478.14	0	0	1	0	0	0	0	0
B0478.15	0	0	3	0	0	1	0	0
B0478.16	2	1	2	1	0	0	1	0
B0478.17	1	4	2	2	0	1	1	1
B0478.18	7	3	6	7	1	6	4	5
B0478.19	0	1	0	0	0	0	1	0
B0478.20	0	0	1	3	0	0	1	0
B0478.21	0	0	0	0	0	0	0	0
B0478.22	0	2	0	0	0	0	0	0
B0478.24	2	0	7	6	0	0	1	1
B0478.25	4	4	9	7	0	0	1	2
B0478.26	5	1	7	6	0	2	5	0
B0478.3	396	396	298	428	29	38	33	22
B0478.4	0	0	0	0	0	0	0	0
B0478.5	1	0	0	0	0	0	0	1
B0478.6	0	0	0	0	0	0	0	0
B0478.7	1	0	0	0	0	0	0	0
B0478.8	0	0	0	0	0	0	0	0
B0478.9	0	0	0	0	0	0	0	0
B0491.1	662	589	506	580	424	458	507	391
B0491.10	7	0	2	1	1	0	2	2
B0491.11	0	0	0	0	0	0	0	0
B0491.2	88	55	75	108	13077	15695	12377	11759
B0491.3	10	9	24	22	3	5	14	9
B0491.4	277	202	244	238	109	152	198	118
B0491.5	6870	5339	5222	6627	6170	7635	5604	5829
B0491.6	1331	1152	1036	1157	633	816	833	667
B0491.7	600	457	536	586	956	1260	833	982
B0491.8	1388	1013	1030	1230	529	687	486	643
B0491.9	4	4	6	12	1	2	1	0
B0491.t1	0	0	0	0	0	0	0	0
B0491.t2	0	0	0	0	0	1	0	0
B0495.1	103	49	70	64	37	45	34	37
B0495.10	2985	2203	2123	2411	941	1307	1406	1245
B0495.11	0	1	0	0	0	0	0	0
B0495.12	0	0	1	1	0	0	0	2
B0495.13	0	0	0	0	0	0	0	0
B0495.14	0	4	1	3	0	0	0	0
B0495.15	42	22	24	42	5	9	5	15
B0495.16	2	0	0	0	0	0	2	0
B0495.17	0	1	0	2	0	0	2	0
B0495.18	3	6	1	4	0	0	2	5
B0495.19	1	0	0	0	0	0	0	0
B0495.2	1439	1060	1073	1311	1090	1515	1165	1222
B0495.20	2	1	2	4	0	0	3	3
B0495.21	0	0	0	0	0	0	0	0
B0495.22	6	0	4	5	0	0	2	2
B0495.4	2247	1676	1685	1930	2522	3383	2318	2609
B0495.5	908	722	740	842	556	613	587	599
B0495.6	157	119	112	161	278	353	272	248
B0495.7	2745	2433	2795	2798	4999	6103	5281	5346
B0495.8	1086	854	775	967	977	1285	958	866
B0495.9	1147	898	797	1033	627	811	613	619
B0496.1	8	3	6	9	1	0	12	0
B0496.10	0	0	0	0	0	0	0	0
B0496.11	94	78	75	73	25	46	33	35
B0496.12	0	0	0	0	0	0	0	0
B0496.13	2	2	2	3	2	1	6	3
B0496.14	0	0	0	0	0	1	1	0
B0496.15	0	0	2	1	0	0	0	0
B0496.16	1	0	0	0	0	0	0	0
B0496.17	3	0	1	0	0	0	0	0
B0496.18	0	2	1	3	0	0	0	0
B0496.19	0	2	1	5	0	0	0	2
B0496.2	12	10	12	10	4	5	12	5
B0496.3	5373	3884	4254	4757	3399	4435	4265	3724
B0496.5	24	9	39	71	2	10	11	7
B0496.6	4	6	2	7	7	3	1	1
B0496.7	76	54	51	69	44	85	109	65
B0496.8	749	506	475	542	374	529	667	465
B0496.9	0	0	0	0	0	0	0	0
B0507.1	233	125	192	155	876	839	1140	827
B0507.10	100	60	87	86	62	94	418	48
B0507.11	61	44	32	46	6	17	17	10
B0507.12	0	0	0	0	0	0	0	0
B0507.13	0	3	2	4	0	0	2	0
B0507.14	0	0	2	1	0	0	7	0
B0507.2	2154	1656	1602	2007	936	1175	1291	1009
B0507.3	347	319	348	329	190	237	245	197
B0507.4	10	3	7	2	0	2	7	1
B0507.5	2	1	0	3	0	3	2	0
B0507.6	55	51	46	73	18	11	92	8
B0507.7	16	18	18	12	4	5	37	10
B0507.8	50	21	48	52	15	51	256	36
B0507.9	8	19	7	10	2	9	9	9
B0511.1	109	79	123	128	117	159	430	144
B0511.10	3870	2760	3045	3489	5731	7557	5606	6118
B0511.11	69	44	93	113	42	43	70	55
B0511.12	3544	2669	3164	3233	2185	2756	2806	2547
B0511.13	428	335	330	359	347	443	411	399
B0511.14	555	403	563	630	280	441	499	411
B0511.15	4	3	21	31	0	1	2	11
B0511.16	21	16	11	22	17	11	11	14
B0511.2	23	25	23	24	14	21	24	12
B0511.3	34	26	22	33	2	2	7	7
B0511.4	9	4	9	7	3	7	6	6
B0511.5	53	50	64	42	68	90	147	68
B0511.6	2	1	0	0	0	0	0	0
B0511.7	415	292	325	351	448	568	484	407
B0511.8	2108	1614	1693	1805	3068	4325	2786	3578
B0511.9	598	440	503	535	592	759	552	579
B0513.1	7248	4639	5733	6512	3917	5241	5991	4706
B0513.11	0	0	1	1	0	0	3	1
B0513.12	52	52	50	56	84	106	64	70
B0513.13	0	0	0	0	0	0	0	0
B0513.14	0	0	0	0	0	0	0	0
B0513.15	1	0	0	0	0	0	0	0
B0513.16	0	0	0	0	0	0	0	0
B0513.17	2	1	3	1	0	1	0	1
B0513.18	0	0	0	0	0	0	0	0
B0513.19	0	0	1	0	0	0	0	0
B0513.2	314	237	303	271	459	658	544	480
B0513.20	0	0	0	0	0	0	0	0
B0513.21	0	0	0	0	0	0	0	0
B0513.22	0	0	0	1	0	0	0	0
B0513.23	7	0	1	3	2	1	2	4
B0513.24	0	0	0	0	0	0	0	0
B0513.25	0	0	0	0	0	0	0	0
B0513.26	0	0	1	2	1	1	1	0
B0513.27	10	2	8	5	3	3	0	0
B0513.28	2	1	5	0	0	0	0	0
B0513.29	0	0	0	0	0	0	0	0
B0513.3	10606	8226	7309	10102	9875	12160	7947	9118
B0513.30	0	7	0	0	1	0	1	1
B0513.31	0	0	0	0	0	0	0	0
B0513.32	0	0	0	2	0	0	0	0
B0513.33	2	3	0	2	0	0	0	0
B0513.34	0	0	0	0	0	0	0	0
B0513.35	5	1	2	3	0	1	5	10
B0513.36	0	0	0	0	0	1	1	0
B0513.37	0	0	0	0	0	0	0	0
B0513.38	0	0	0	0	0	0	0	0
B0513.39	0	0	0	0	0	0	0	0
B0513.4	74	59	48	73	21	42	26	21
B0513.40	5	6	7	6	0	1	1	0
B0513.41	0	0	0	0	0	0	0	0
B0513.42	9	6	3	8	1	2	7	5
B0513.43	0	2	0	4	0	0	0	1
B0513.44	0	0	0	0	0	0	0	0
B0513.45	0	0	0	0	0	0	0	0
B0513.46	0	0	0	0	0	0	0	0
B0513.47	0	0	0	0	0	0	0	0
B0513.48	5	2	2	1	0	1	3	2
B0513.49	0	0	0	0	0	0	0	0
B0513.5	2267	1701	1809	1832	1963	3036	2047	2570
B0513.50	0	0	0	0	0	0	0	1
B0513.51	4	5	5	8	2	6	2	1
B0513.52	0	0	0	0	0	0	0	0
B0513.53	0	5	1	2	0	0	1	1
B0513.54	0	0	0	0	0	0	0	1
B0513.55	0	2	0	0	0	0	0	0
B0513.56	0	0	0	0	0	0	0	0
B0513.57	0	0	0	0	0	0	0	0
B0513.58	0	0	0	0	0	0	0	0
B0513.59	0	0	0	0	0	0	0	0
B0513.6	11	2	19	16	1	2	9	7
B0513.60	0	0	0	0	0	0	0	0
B0513.61	0	0	0	0	0	0	0	0
B0513.62	0	0	0	0	0	0	0	0
B0513.63	3	1	0	0	2	7	4	6
B0513.64	2	1	1	2	1	6	1	3
B0513.65	0	0	0	0	0	0	0	0
B0513.66	0	0	0	0	0	1	0	0
B0513.67	5	3	0	2	0	2	1	0
B0513.68	0	2	4	1	0	0	0	0
B0513.69	0	0	0	0	0	0	0	0
B0513.7	157	127	135	189	211	236	171	214
B0513.70	0	1	0	0	0	0	0	0
B0513.71	1	0	0	1	2	2	2	1
B0513.72	0	0	0	0	0	0	0	0
B0513.73	0	0	0	0	0	0	0	0
B0513.74	8	0	2	0	0	3	3	0
B0513.75	4	1	1	1	0	0	0	0
B0513.76	0	0	0	0	0	0	0	0
B0513.77	0	0	0	0	0	0	0	0
B0513.78	0	0	0	0	0	0	0	0
B0513.79	4	2	5	6	5	2	4	0
B0513.80	1	7	2	2	2	4	3	4
B0513.81	1	2	3	0	0	1	2	1
B0513.82	5	2	5	7	1	0	1	1
B0513.83	0	0	0	0	0	0	0	0
B0513.84	0	0	0	0	0	0	0	0
B0513.85	0	0	0	0	0	0	0	0
B0513.86	0	0	3	0	0	0	0	0
B0513.87	3	0	1	1	0	3	3	1
B0513.88	0	0	1	1	0	0	0	2
B0513.89	0	0	0	0	0	0	0	0
B0513.9	561	374	325	448	126	160	112	123
B0513.t1	5	10	4	6	0	3	4	3
B0523.1	40	33	49	73	9	4	46	21
B0523.3	119	106	137	119	176	208	182	162
B0523.5	2104	1685	1877	1838	2068	2602	2675	2381
B0523.6	0	0	1	0	0	1	0	0
B0523.t1	0	0	0	0	0	0	0	0
B0524.2	1	1	1	14	1	0	5	0
B0524.3	6	14	8	33	1	1	8	7
B0524.4	7	11	18	33	6	7	7	9
B0524.5	2	0	0	4	1	0	3	2
B0524.6	418	325	321	369	446	613	458	541
B0524.8	0	0	0	0	0	0	0	0
B0524.9	0	0	1	0	0	0	0	0
B0545.1	6316	4621	4727	5688	2758	3791	3624	3167
B0545.3	60	40	145	99	4	12	29	34
B0545.4	113	113	104	126	62	89	73	64
B0546.1	5893	4626	3962	5818	7463	8165	5384	5920
B0546.2	1016	750	845	891	291	382	641	345
B0546.3	2121	1545	1557	1872	564	744	829	647
B0546.4	2458	1878	1860	2197	291	363	711	294
B0546.5	2	2	4	5	1	0	2	2
B0547.1	838	607	613	766	730	913	742	722
B0547.10	0	0	0	0	0	0	0	0
B0547.11	0	0	0	0	0	0	0	0
B0547.12	0	0	0	0	0	0	0	0
B0547.13	0	0	0	0	0	0	0	0
B0547.14	0	0	0	0	0	0	1	0
B0547.15	0	2	0	0	0	0	0	1
B0547.16	1	1	1	1	0	0	0	0
B0547.17	3	1	1	2	0	0	2	0
B0547.18	0	0	0	0	0	0	0	0
B0547.19	0	0	0	0	0	0	0	0
B0547.2	2	1	1	0	0	0	0	0
B0547.20	0	0	0	0	0	0	0	0
B0547.21	0	0	0	0	0	0	0	0
B0547.22	0	0	0	0	0	0	0	0
B0547.23	0	1	0	0	0	0	1	0
B0547.24	0	0	0	0	0	0	0	0
B0547.25	0	0	0	0	0	0	0	0
B0547.26	0	0	0	0	0	0	0	0
B0547.27	0	0	0	0	0	0	0	0
B0547.28	0	0	0	0	0	0	0	0
B0547.29	0	0	0	0	0	0	0	0
B0547.3	10	15	11	22	26	40	46	24
B0547.30	0	0	0	0	0	0	0	0
B0547.31	0	0	0	0	0	0	0	0
B0547.32	0	0	0	0	0	0	0	0
B0547.33	0	0	0	0	0	0	0	0
B0547.34	0	0	0	0	0	0	0	0
B0547.4	16	11	4	9	7	3	6	5
B0547.5	2	0	0	2	0	0	1	0
B0547.6	0	0	0	0	0	0	0	0
B0547.7	1	0	1	0	0	0	0	0
B0547.8	0	0	0	0	0	0	0	0
B0547.9	0	0	0	0	0	0	0	0
B0554.1	0	0	1	2	1	0	1	2
B0554.2	0	7	11	15	0	0	3	2
B0554.3	0	2	0	3	0	0	0	0
B0554.4	2	3	1	8	3	2	5	6
B0554.5	46	75	83	57	39	56	31	46
B0554.6	9	28	13	28	20	10	11	6
B0554.7	12	20	13	11	33	28	18	13
B0554.8	0	0	0	0	0	0	0	0
B0563.1	11	19	18	19	1	1	10	4
B0563.10	5	4	4	4	0	0	2	3
B0563.11	0	0	0	0	0	0	1	0
B0563.13	2	4	1	0	0	0	0	0
B0563.15	0	0	1	0	0	0	1	1
B0563.16	5	8	1	2	0	2	0	2
B0563.17	12	3	15	13	3	0	7	6
B0563.2	170	156	159	200	123	151	156	143
B0563.4	2028	1607	1704	1985	1289	1726	1340	1302
B0563.5	32	44	45	65	3	3	17	13
B0563.6	542	426	406	421	178	263	213	213
B0563.7	175	145	138	201	47	68	73	64
B0563.8	4	4	10	16	1	3	6	2
B0563.9	12	14	5	23	0	0	2	0
B0564.1	1193	894	917	997	2224	2608	1873	2275
B0564.10	409	269	259	355	191	244	211	210
B0564.11	468	343	362	438	380	489	406	437
B0564.12	0	0	0	0	0	0	0	0
B0564.2	196	137	85	161	121	140	113	132
B0564.3	3784	3512	3020	3211	121	215	292	172
B0564.4	292	315	222	287	14	24	42	13
B0564.6	322	238	273	297	136	134	259	154
B0564.7	769	598	685	774	1148	1564	1135	1233
B0564.9	313	241	283	295	158	154	263	175
BE0003N10.1	556	336	441	599	748	932	651	771
BE0003N10.2	395	293	371	370	471	608	464	461
BE0003N10.3	214	167	557	635	535	520	651	528
BE0003N10.4	7	6	28	37	0	0	6	8
BE0003N10.t1	0	2	5	8	0	0	1	0
BE0003N10.t2	0	0	3	3	0	1	1	2
BE0003N10.t3	2	2	16	8	0	3	4	1
BE0003N10.t4	4	3	4	6	2	4	1	2
BE0003N10.t5	5	2	6	12	1	1	1	1
BE0003N10.t6	4	4	12	15	0	5	5	5
BE10.1	9	7	34	42	2	2	6	9
BE10.2	139	89	141	142	1413	1630	1533	1316
BE10.3	49	20	45	63	2	9	71	16
BE10.4	152	90	148	189	20	24	61	49
BE10.5	5	9	20	24	2	4	6	3
BE10.6	1	6	4	3	0	2	3	2
BE10.7	0	1	0	1	0	0	1	2
C01A2.1	213	155	204	256	52	96	111	83
C01A2.10	0	0	0	2	0	0	0	0
C01A2.2	298	226	224	309	332	448	368	350
C01A2.3	635	470	500	529	1708	2470	1521	1895
C01A2.4	475	272	352	416	316	397	497	278
C01A2.5	1248	818	885	1022	882	1110	1116	962
C01A2.6	12	8	39	27	1	2	22	10
C01A2.7	2581	2087	1941	2220	563	803	648	602
C01A2.8	0	0	5	1	1	2	0	0
C01A2.9	2	1	10	11	0	2	2	1
C01B10.1	8439	6228	5778	6473	2762	3034	2366	2545
C01B10.10	291	290	255	325	289	306	329	319
C01B10.11	1708	918	1045	1194	2847	4104	3655	2892
C01B10.12	0	0	0	0	0	0	0	0
C01B10.13	0	0	0	0	0	0	0	0
C01B10.14	0	0	0	0	0	0	0	0
C01B10.15	0	0	0	5	0	0	2	0
C01B10.16	0	0	0	0	0	0	0	0
C01B10.17	0	0	2	1	0	0	0	0
C01B10.18	0	0	0	2	0	0	0	0
C01B10.19	0	0	0	0	0	0	0	0
C01B10.20	2	0	0	0	0	0	0	0
C01B10.21	0	0	0	0	0	0	0	0
C01B10.22	0	0	0	1	0	0	0	1
C01B10.23	0	0	0	0	0	0	0	0
C01B10.24	0	0	0	0	0	0	0	0
C01B10.25	0	0	1	0	0	0	0	0
C01B10.26	0	0	0	0	1	0	1	0
C01B10.27	0	0	0	0	0	0	0	0
C01B10.28	0	2	4	0	0	0	0	0
C01B10.29	0	0	0	0	0	0	0	0
C01B10.3	374	310	202	323	269	369	304	304
C01B10.30	0	0	0	0	0	0	0	0
C01B10.31	0	0	0	0	0	0	0	0
C01B10.32	0	2	2	0	0	0	0	0
C01B10.33	0	2	2	1	0	1	0	1
C01B10.34	0	0	0	0	0	0	0	0
C01B10.35	0	2	2	0	0	0	0	1
C01B10.36	0	0	0	0	0	0	0	0
C01B10.37	1	0	0	1	0	0	0	0
C01B10.38	1	1	0	1	0	0	0	1
C01B10.39	0	0	0	0	0	0	0	0
C01B10.4	179	165	199	191	116	124	130	132
C01B10.40	0	0	0	0	0	0	0	0
C01B10.41	0	0	0	0	0	0	0	0
C01B10.42	0	1	0	0	0	0	1	0
C01B10.43	0	0	0	0	0	0	0	0
C01B10.44	13	2	4	1	1	0	2	1
C01B10.45	2	3	2	4	0	0	2	1
C01B10.46	0	0	0	0	0	0	0	0
C01B10.47	0	0	0	0	0	0	0	0
C01B10.5	2176	1500	1749	2006	628	768	3134	641
C01B10.6	3604	2550	2596	3529	1737	2433	1703	1744
C01B10.7	2	4	4	11	9	3	2	8
C01B10.8	1008	817	969	1002	1520	2333	1449	1830
C01B10.9	1380	1136	1018	1187	1043	1315	1008	1076
C01B12.1	18	15	14	9	3785	4829	3813	3355
C01B12.10	0	0	1	2	0	4	1	1
C01B12.2	1407	1040	1022	1168	826	1041	951	826
C01B12.3	552	486	503	527	233	360	442	246
C01B12.4	303	258	178	276	80	119	104	97
C01B12.5	138	146	109	156	77	139	97	80
C01B12.8	50	33	38	45	81	80	93	59
C01B12.9	111	80	97	103	54	60	94	43
C01B4.1	1	3	8	9	0	0	0	0
C01B4.10	5	6	12	9	0	0	3	0
C01B4.2	0	0	0	8	0	0	0	0
C01B4.3	19	21	12	29	1	4	7	6
C01B4.4	18	16	16	18	5	11	10	8
C01B4.5	14	17	20	20	7	6	8	7
C01B4.6	292	196	194	241	69	109	75	60
C01B4.7	1108	1106	1195	958	72	94	180	73
C01B4.8	108	96	127	108	34	75	83	48
C01B4.9	276	190	199	263	372	383	365	408
C01B7.1	4746	3335	3903	4065	3521	4641	5127	3880
C01B7.10	5	6	11	6	0	1	2	0
C01B7.11	0	0	0	0	0	0	0	0
C01B7.12	0	0	0	0	0	0	0	0
C01B7.13	0	0	0	0	0	0	0	0
C01B7.14	1	2	1	0	0	0	2	0
C01B7.15	0	0	0	0	0	0	0	0
C01B7.16	0	0	0	2	0	0	0	0
C01B7.3	0	3	2	10	0	2	0	1
C01B7.4	2136	1485	1462	1770	923	1211	1071	1028
C01B7.5	132	86	105	95	42	54	38	47
C01B7.6	5517	4324	4393	4734	2288	2998	3162	2710
C01B7.7	65	52	28	42	22	35	22	22
C01B7.8	0	0	2	0	0	0	0	0
C01B7.9	7	7	5	12	0	1	0	4
C01B9.1	357	370	333	364	533	781	522	579
C01B9.3	3	5	15	20	0	0	5	6
C01B9.4	1	0	3	1	0	0	0	0
C01B9.5	17	12	10	10	11	10	15	10
C01B9.6	0	1	3	9	0	0	0	0
C01C10.1	195	187	147	145	218	254	234	216
C01C10.2	671	491	483	480	234	334	313	228
C01C10.3	1257	723	768	1017	393	444	698	419
C01C10.4	600	453	425	476	407	468	468	433
C01C10.5	0	1	7	1	0	0	0	0
C01C4.1	1069	882	888	1145	284	351	233	270
C01C4.2	26	17	21	29	13	8	15	7
C01C4.3	2368	1780	1599	2016	850	1188	836	955
C01C4.4	2	1	1	1	1	2	2	0
C01C4.5	0	1	1	1	0	0	0	0
C01C4.7	0	2	1	1	0	0	0	0
C01C7.1	2825	2051	2410	2714	1956	2505	2334	2087
C01F1.1	1812	1389	1387	1719	1443	1962	1878	1553
C01F1.2	1023	725	832	1105	1326	1672	1258	1347
C01F1.3	406	271	557	536	2814	3072	2985	2493
C01F1.4	229	184	212	280	45	81	66	103
C01F1.5	69	63	111	85	517	584	383	472
C01F1.6	1403	1000	1119	1360	648	820	750	775
C01F1.7	0	0	0	0	0	0	0	0
C01F1.8	0	0	1	0	0	0	0	1
C01F4.2	1400	861	962	1197	412	619	560	541
C01F4.4	7	5	3	3	1	2	3	3
C01F4.6	5	4	2	2	1	6	3	2
C01F4.7	6	2	4	2	0	0	2	1
C01F4.8	0	1	3	10	0	0	3	0
C01F4.9	4	3	4	7	0	2	0	0
C01F6.1	569	366	411	483	382	526	644	439
C01F6.10	0	2	2	1	0	0	5	1
C01F6.11	0	0	0	1	0	0	0	0
C01F6.12	0	0	0	0	0	2	0	0
C01F6.13	6	3	3	4	2	1	2	2
C01F6.2	27	33	30	30	8	21	22	7
C01F6.3	1845	1433	1390	1698	975	1337	904	1006
C01F6.4	155	139	151	139	103	151	206	141
C01F6.5	861	526	694	699	899	1192	1594	937
C01F6.6	4490	3724	3741	3918	4261	6498	5008	4757
C01F6.8	1009	726	700	883	1022	1457	1015	1107
C01F6.9	623	431	433	545	756	1014	718	710
C01G10.1	7	9	15	31	1	5	11	4
C01G10.10	421	270	285	364	262	341	305	314
C01G10.11	2592	1917	1974	2288	1357	1867	1976	1533
C01G10.12	121	85	68	106	100	152	81	91
C01G10.13	0	0	0	3	0	0	0	0
C01G10.14	1	3	3	7	0	0	1	0
C01G10.15	328	352	275	321	417	584	346	478
C01G10.16	100	89	68	111	32	53	41	32
C01G10.17	55	33	39	42	17	26	19	32
C01G10.18	0	1	8	4	0	3	0	0
C01G10.19	0	0	1	4	0	0	0	0
C01G10.2	6	10	8	13	4	6	4	1
C01G10.3	7	1	1	9	0	1	3	0
C01G10.4	77	59	80	36	35	70	37	40
C01G10.5	75	58	67	79	105	95	88	91
C01G10.6	367	336	239	373	529	830	436	666
C01G10.7	467	317	306	405	385	509	317	388
C01G10.8	2603	1882	1879	2041	5364	7436	6195	5603
C01G10.9	315	249	267	297	714	1014	713	831
C01G12.1	1505	999	1064	1378	968	1348	1046	1146
C01G12.10	1	0	1	0	6	1	3	3
C01G12.11	0	0	0	0	0	1	0	4
C01G12.12	25	21	18	16	15	12	18	10
C01G12.13	14	22	25	50	0	5	20	17
C01G12.14	24	11	21	23	8	5	9	11
C01G12.15	12	7	7	7	1	3	5	1
C01G12.2	6	2	4	7	5	5	5	6
C01G12.3	12	9	24	20	3	5	18	10
C01G12.4	53	25	40	59	9	9	37	14
C01G12.5	8	3	16	7	1	7	30	12
C01G12.6	2	1	5	10	5	4	0	8
C01G12.7	826	535	424	690	140	211	276	207
C01G12.8	47	34	51	80	4	10	23	17
C01G12.9	0	4	9	6	0	0	1	2
C01G5.10	6	3	1	2	0	1	1	0
C01G5.11	0	1	1	0	0	1	0	0
C01G5.12	5	5	3	4	1	2	3	4
C01G5.13	0	0	1	1	0	0	0	0
C01G5.14	0	0	0	0	0	0	0	0
C01G5.15	1	0	0	0	0	0	0	0
C01G5.16	0	1	1	1	0	0	0	0
C01G5.17	0	4	1	1	1	0	0	2
C01G5.18	0	0	0	0	0	0	0	0
C01G5.19	2	2	2	1	0	1	1	5
C01G5.2	448	404	448	469	906	1137	656	917
C01G5.20	1	0	6	0	0	2	3	0
C01G5.21	1	0	0	0	0	0	0	0
C01G5.22	2	5	4	2	1	1	1	3
C01G5.23	4	2	2	0	0	2	2	4
C01G5.24	0	0	0	0	0	0	0	1
C01G5.3	71	71	60	79	57	68	46	67
C01G5.4	3	8	30	58	4	7	15	10
C01G5.5	221	167	185	194	113	127	113	84
C01G5.6	647	455	573	588	650	830	747	656
C01G5.7	22	23	43	49	9	13	31	10
C01G5.8	373	319	357	404	300	363	342	329
C01G5.9	65	40	75	96	73	69	112	71
C01G6.1	19680	14778	15412	19308	11545	13707	18156	11401
C01G6.10	12	18	16	19	10	6	14	2
C01G6.11	0	0	0	0	0	0	0	0
C01G6.12	0	0	0	0	0	0	0	0
C01G6.13	2	6	1	10	2	1	1	1
C01G6.2	9	7	10	10	0	2	6	2
C01G6.3	101	60	509	118	49	108	1633	124
C01G6.4	1110	862	878	997	348	489	619	430
C01G6.5	11519	7717	7584	9255	5106	7551	6962	6358
C01G6.6	5296	3778	3619	4410	3551	3959	2828	3518
C01G6.7	597	389	632	827	1255	1533	1362	1390
C01G6.8	3975	2894	3320	3364	2498	3411	3953	2984
C01G6.9	15	13	30	15	38	50	62	44
C01G8.1	74	58	93	89	33	44	73	34
C01G8.10	0	0	0	0	0	0	0	0
C01G8.2	451	334	379	406	262	358	329	282
C01G8.3	636	474	526	571	506	611	544	536
C01G8.4	264	266	225	240	198	253	163	206
C01G8.5	7414	5574	5821	6790	9367	12573	9834	10320
C01G8.6	67	35	73	88	160	197	148	130
C01G8.9	17425	12317	13109	14987	8892	12180	11371	10539
C01H6.1	18	29	37	45	160	156	114	89
C01H6.10	0	0	1	0	0	0	0	0
C01H6.11	0	1	1	0	2	0	0	0
C01H6.2	273	247	281	297	232	308	253	262
C01H6.3	115	98	94	128	83	102	77	80
C01H6.4	136	123	139	140	321	409	278	289
C01H6.5	339	280	390	436	1909	1885	1485	1580
C01H6.6	108	81	99	98	108	104	136	122
C01H6.7	1842	1375	1515	1654	1630	1974	2110	1679
C01H6.8	220	201	168	224	388	538	379	391
C01H6.9	311	274	329	376	380	597	501	429
C02A12.1	300	105	166	132	70	95	575	69
C02A12.10	11	13	4	19	3	6	15	4
C02A12.2	1	1	19	19	0	0	1	4
C02A12.3	23	13	33	49	0	7	14	14
C02A12.4	555	349	379	503	969	995	860	898
C02A12.5	1	3	19	12	1	3	7	12
C02A12.6	1	3	12	25	0	0	3	12
C02A12.8	11	15	38	25	0	2	12	12
C02A12.9	4	1	22	12	0	3	1	2
C02B10.1	2187	1541	1713	1946	5854	6654	4339	5246
C02B10.10	0	0	0	0	0	0	0	0
C02B10.11	0	2	1	2	0	0	0	0
C02B10.12	0	0	0	0	0	0	0	0
C02B10.13	0	0	0	0	0	0	0	0
C02B10.14	0	1	1	0	0	0	0	0
C02B10.15	0	0	2	0	0	0	1	0
C02B10.16	0	0	0	0	0	0	0	0
C02B10.17	0	0	0	1	0	0	0	0
C02B10.18	0	0	0	0	0	0	0	0
C02B10.19	0	0	0	0	0	0	0	0
C02B10.2	267	204	228	274	278	317	299	242
C02B10.20	2	1	0	2	0	3	4	3
C02B10.21	0	0	0	0	0	0	0	0
C02B10.22	0	0	3	1	0	0	2	0
C02B10.23	0	0	1	0	0	0	0	0
C02B10.24	0	0	1	0	0	0	0	0
C02B10.25	0	0	0	0	0	0	0	0
C02B10.26	0	0	0	0	0	0	0	0
C02B10.27	0	0	0	1	0	0	0	0
C02B10.28	0	1	0	1	0	0	0	0
C02B10.29	0	0	0	0	0	0	0	0
C02B10.3	2654	2087	2273	2491	2405	3273	2636	2658
C02B10.30	2	0	0	0	0	0	0	0
C02B10.31	0	1	0	1	0	0	0	0
C02B10.32	0	0	0	0	0	0	0	0
C02B10.33	0	0	0	3	0	0	3	0
C02B10.34	0	0	0	0	0	0	0	0
C02B10.35	0	0	0	0	0	0	0	0
C02B10.36	1	0	1	1	0	0	0	0
C02B10.37	0	0	0	0	0	0	0	0
C02B10.38	0	1	1	0	0	0	0	0
C02B10.39	0	0	0	0	0	0	0	0
C02B10.4	1089	759	837	1024	1493	1911	1648	1542
C02B10.40	0	0	0	0	0	0	0	0
C02B10.41	0	0	0	0	0	0	0	0
C02B10.42	0	0	0	1	0	0	0	0
C02B10.43	2	2	1	1	0	0	1	0
C02B10.44	0	0	2	0	0	0	0	0
C02B10.45	0	0	0	0	0	0	0	0
C02B10.46	0	0	0	0	0	0	0	0
C02B10.47	0	0	0	0	0	1	1	2
C02B10.48	1	0	0	0	0	0	0	0
C02B10.49	0	0	0	0	0	0	0	0
C02B10.5	1238	790	1084	1302	1010	1331	1173	1169
C02B10.50	0	0	0	0	0	0	0	0
C02B10.51	1	0	2	5	0	0	0	0
C02B10.52	0	0	0	0	0	0	0	0
C02B10.53	0	0	0	2	0	0	1	0
C02B10.54	1	4	3	6	0	1	4	2
C02B10.55	3	3	1	1	0	0	0	0
C02B10.56	2	1	2	3	0	0	0	0
C02B10.57	1	0	1	3	0	0	2	2
C02B10.58	0	2	2	0	0	0	0	0
C02B10.59	0	0	0	0	0	0	0	0
C02B10.6	28	26	104	118	1	3	32	35
C02B10.60	0	0	0	0	0	0	0	0
C02B10.61	2	1	3	0	2	1	0	1
C02B10.62	0	0	0	0	0	0	0	0
C02B10.63	0	0	0	0	0	0	0	0
C02B10.64	0	0	0	0	0	0	0	0
C02B10.65	0	0	0	0	0	0	0	0
C02B10.66	0	0	0	0	0	0	0	0
C02B10.67	0	0	0	0	0	0	0	0
C02B10.68	0	0	0	0	0	0	0	0
C02B10.69	0	0	0	0	0	1	0	0
C02B10.7	0	0	0	0	0	0	0	0
C02B10.70	0	0	0	0	0	0	0	2
C02B10.71	2	1	4	2	0	0	0	0
C02B10.72	3	2	2	3	1	0	3	0
C02B10.73	0	2	8	4	0	0	1	0
C02B10.74	2	8	5	5	2	1	1	0
C02B10.8	0	0	1	0	0	0	1	0
C02B10.9	0	0	0	0	0	0	0	0
C02B4.1	240	162	282	256	1333	1693	1858	1378
C02B4.10	0	0	5	2	0	0	0	0
C02B4.11	0	0	0	0	0	2	0	0
C02B4.12	0	1	1	0	0	0	0	0
C02B4.13	1	3	10	10	0	0	0	4
C02B4.14	0	1	0	0	1	1	0	0
C02B4.2	667	484	537	644	363	558	607	489
C02B4.3	4	7	9	11	0	1	1	6
C02B4.4	441	330	323	537	69	160	111	93
C02B4.5	1	0	0	5	0	0	2	0
C02B4.6	1	0	6	3	3	0	3	7
C02B4.7	0	0	1	4	0	0	1	0
C02B4.8	0	0	0	0	0	0	0	0
C02B4.9	0	0	0	0	0	0	0	0
C02B4.t1	0	1	0	3	0	0	1	0
C02B4.t2	0	0	0	0	0	0	0	0
C02B8.1	24	8	15	19	13	7	11	18
C02B8.10	1	0	0	0	0	0	0	0
C02B8.11	0	0	0	1	0	0	0	1
C02B8.2	3	4	3	3	2	0	1	0
C02B8.3	397	365	362	401	315	349	270	285
C02B8.4	45	42	34	52	25	23	23	12
C02B8.5	329	221	228	292	116	168	100	128
C02B8.6	383	330	339	362	292	358	356	314
C02B8.7	1	1	4	2	0	1	2	2
C02B8.8	0	0	0	0	0	0	0	0
C02B8.9	0	0	0	0	0	0	0	0
C02C2.1	718	547	553	729	838	772	672	661
C02C2.3	271	218	176	214	232	275	300	193
C02C2.4	210	164	144	200	178	184	175	158
C02C2.5	360	316	260	320	202	303	214	183
C02C6.1	6398	4711	5582	5987	3864	5294	5074	4640
C02C6.10	1	2	1	3	0	0	0	0
C02C6.11	0	0	0	0	0	0	0	0
C02C6.12	0	2	0	1	0	0	2	0
C02C6.2	2679	1778	1619	2371	773	1119	1154	1130
C02C6.3	1998	1499	1543	2030	1574	1958	1846	1828
C02C6.4	8	3	13	26	1	1	3	5
C02C6.5	2	1	2	1	0	0	0	0
C02C6.6	0	0	0	0	0	0	0	0
C02C6.7	0	0	0	0	0	0	0	0
C02C6.8	0	0	3	0	0	1	0	0
C02D4.1	26	17	19	32	160	173	109	138
C02D4.10	1	0	1	0	0	0	0	0
C02D4.11	8	2	2	11	0	1	1	1
C02D4.12	0	0	0	0	0	0	0	0
C02D4.13	0	0	0	0	0	0	0	0
C02D4.14	0	0	0	1	0	0	0	1
C02D4.16	0	0	0	1	0	1	1	0
C02D4.2	677	522	530	521	228	389	278	263
C02D4.3	0	0	0	3	0	0	1	0
C02D4.4	4	0	0	1	2	1	0	1
C02D4.5	2	4	3	7	0	5	3	0
C02D4.6	0	0	0	0	0	0	0	0
C02D4.7	0	0	0	0	0	0	0	0
C02D4.8	7	4	8	7	2	2	2	2
C02D4.9	5	4	5	4	0	1	1	1
C02D4.t1	0	0	0	1	1	0	1	0
C02D5.1	22	14	43	49	225	313	452	223
C02D5.2	650	505	452	554	581	749	669	632
C02D5.3	30	8	27	22	11	13	46	12
C02D5.4	2327	2000	2242	2380	1169	1559	1894	1106
C02D5.5	0	0	0	0	0	0	1	0
C02E11.1	4999	3767	4410	4911	9680	12075	9579	10514
C02E7.1	8	12	14	25	2	4	38	3
C02E7.10	4	3	8	7	0	5	7	5
C02E7.11	0	1	0	4	1	2	5	0
C02E7.12	1	0	0	1	0	0	3	0
C02E7.13	3	2	1	2	1	3	4	2
C02E7.15	0	5	0	0	0	0	0	1
C02E7.16	0	0	0	0	0	0	0	0
C02E7.17	5	4	5	3	0	2	1	0
C02E7.2	117	99	92	98	24	37	27	20
C02E7.3	111	50	46	62	2	8	44	4
C02E7.4	113	77	54	85	6	1	52	2
C02E7.5	95	45	41	65	4	2	57	9
C02E7.6	134	53	135	189	3948	3447	3611	2712
C02E7.7	52	15	76	38	859	738	1475	646
C02E7.8	32	11	11	6	0	6	13	0
C02E7.9	2	1	3	2	0	0	1	0
C02F12.1	219	178	195	214	129	155	259	122
C02F12.10	36	38	44	38	12	8	12	6
C02F12.11	0	0	0	0	0	0	0	0
C02F12.12	0	0	0	0	0	0	0	0
C02F12.3	3212	2697	2479	2901	1287	1756	1144	1336
C02F12.4	1861	1108	1279	1519	363	434	640	416
C02F12.5	32	37	28	24	45	49	28	31
C02F12.7	3018	2304	2496	2582	2912	3712	6096	3268
C02F12.8	368	254	288	368	149	199	187	165
C02F12.9	58	54	59	72	10	8	37	23
C02F12.t1	0	0	0	0	0	0	0	0
C02F4.1	2702	2021	2263	2406	1723	2186	2225	2052
C02F4.10	17	24	58	92	0	2	17	20
C02F4.11	15	6	20	19	0	2	1	4
C02F4.2	12075	9138	9957	10935	6429	8692	7782	7596
C02F4.4	38	26	59	80	356	522	458	379
C02F4.5	11	5	21	19	4	2	7	5
C02F4.6	0	0	0	6	0	0	0	2
C02F4.7	0	0	0	0	1	0	1	4
C02F4.8	0	0	0	0	0	0	0	0
C02F4.9	2	0	2	1	0	0	0	0
C02F5.1	584	425	520	505	1314	1807	1580	1570
C02F5.10	9	6	12	8	13	14	11	6
C02F5.11	192	125	97	173	20	33	48	27
C02F5.12	545	460	418	511	299	367	627	287
C02F5.13	175	191	175	196	133	187	168	125
C02F5.14	73	53	65	64	286	304	260	201
C02F5.2	18	10	8	10	6	7	5	4
C02F5.3	5223	4381	3921	4818	1977	2748	2476	2223
C02F5.4	488	327	355	405	388	477	435	385
C02F5.5	8	3	6	7	8	6	11	5
C02F5.6	137	118	118	141	130	113	105	109
C02F5.7	3894	3063	2829	3368	799	1235	1094	969
C02F5.8	200	146	130	138	26	46	83	40
C02F5.9	1184	859	874	1087	3170	3705	2717	2714
C02G6.1	246	195	168	222	271	303	195	296
C02G6.2	6	5	34	30	11	5	8	21
C02G6.3	23	19	33	37	81	84	63	64
C02G6.4	0	0	0	0	0	0	0	0
C02G6.5	0	0	0	0	0	0	0	0
C02H6.1	8	16	31	47	7	1	20	19
C02H6.2	287	234	195	293	181	313	333	266
C02H7.1	497	366	343	399	143	238	268	194
C02H7.2	196	114	132	163	83	103	81	91
C02H7.3	2802	2089	2457	2777	1073	1414	1464	1353
C02H7.4	16	15	21	67	1	5	17	16
C02H7.5	3	1	11	16	0	0	1	3
C03A3.1	352	272	307	367	327	422	435	346
C03A3.2	3342	2581	2530	3208	1990	2665	1947	2139
C03A3.3	54	61	34	55	46	78	68	70
C03A3.4	0	0	0	1	0	1	1	0
C03A3.5	0	5	2	9	2	1	1	2
C03A3.6	2	4	5	5	5	4	1	2
C03A3.7	0	4	9	7	0	1	2	0
C03A3.8	0	0	1	0	0	0	0	0
C03A3.t1	0	0	0	0	0	0	0	0
C03A7.10	34	22	19	24	10	15	8	15
C03A7.11	337	274	258	296	106	154	337	104
C03A7.12	300	252	206	253	0	4	11	2
C03A7.13	121	99	109	121	9	1	6	4
C03A7.14	110	28	146	53	1357	953	1057	1003
C03A7.15	0	0	0	0	0	0	0	0
C03A7.2	280	222	256	279	4	2	18	8
C03A7.3	1	0	1	7	0	0	0	0
C03A7.4	0	1	1	0	146	83	47	115
C03A7.5	69	54	48	63	11	27	14	20
C03A7.6	2	2	0	6	0	0	0	0
C03A7.7	0	1	0	2	22	17	9	26
C03A7.8	19	6	31	11	337	208	172	215
C03A7.9	15	7	5	16	2	4	3	5
C03B1.1	11	6	15	5	3	4	0	2
C03B1.10	5	4	5	5	8	6	6	1
C03B1.12	8875	6816	7126	8575	6442	8203	6489	6674
C03B1.13	133	105	78	135	245	351	396	275
C03B1.14	57	86	85	73	90	145	123	89
C03B1.15	0	0	0	1	0	0	0	0
C03B1.16	0	0	0	0	0	0	0	0
C03B1.2	35	27	53	38	19	29	36	19
C03B1.3	2	5	4	4	4	1	4	1
C03B1.4	21	14	15	22	16	18	14	9
C03B1.5	90	64	70	60	70	102	74	57
C03B1.6	32	52	43	34	25	31	19	33
C03B1.7	254	214	225	279	222	263	288	244
C03B1.9	9	11	3	7	4	6	5	3
C03B1.t1	0	0	0	0	0	0	0	0
C03B8.2	15	11	18	5	0	6	9	9
C03B8.3	98	63	74	84	10	13	41	28
C03B8.4	9521	6280	6866	7438	4541	6657	7925	5889
C03B8.5	0	0	0	0	0	0	0	4
C03B8.6	0	0	0	2	0	0	0	0
C03C10.1	11739	9558	9745	10987	8605	10554	9296	8696
C03C10.10	0	3	2	3	0	1	2	0
C03C10.11	1	0	1	2	2	0	0	0
C03C10.12	2	3	1	1	0	0	0	2
C03C10.2	3	1	4	5	2	2	10	4
C03C10.3	1482	929	1205	1223	2782	3658	3934	2893
C03C10.4	992	583	524	753	288	445	523	368
C03C10.5	3	2	24	11	5	4	69	7
C03C10.7	6	10	3	8	0	3	12	0
C03C10.8	0	0	0	0	0	0	0	0
C03C10.9	2	3	22	9	2	9	59	8
C03C11.1	93	69	68	87	26	28	18	13
C03C11.2	44	30	38	40	31	41	29	25
C03C11.3	0	0	0	0	0	0	0	0
C03C11.4	0	0	0	0	0	0	0	0
C03C11.5	0	0	0	0	0	0	0	0
C03C11.6	0	0	1	0	0	0	0	2
C03C11.7	0	0	0	0	0	0	0	0
C03C11.8	1	0	1	7	0	1	0	0
C03D6.1	75	27	48	66	189	273	223	197
C03D6.3	1189	828	859	919	609	802	846	647
C03D6.4	3068	2211	2343	2802	2633	3555	3073	3119
C03D6.5	17	17	26	34	28	39	65	27
C03D6.6	9	7	19	23	4	3	33	5
C03D6.8	8539	6421	6020	7560	2153	2936	2464	2269
C03E10.1	3	3	5	12	0	3	4	6
C03E10.3	87	76	91	67	45	56	57	49
C03E10.4	1472	1149	1255	1337	1494	1789	1456	1606
C03E10.5	13	18	22	31	2	3	7	6
C03E10.6	3	0	5	4	0	0	2	0
C03E10.7	0	0	0	0	0	0	0	0
C03E10.8	4	4	5	6	0	1	1	0
C03E10.9	5	3	6	1	0	0	1	2
C03F11.1	251	225	145	233	50	74	86	97
C03F11.2	49	17	50	30	83	84	177	73
C03F11.3	2315	1930	1801	2188	1920	2805	1891	2016
C03F11.4	265	209	242	249	152	230	175	183
C03F11.5	1	0	5	9	0	0	1	5
C03F11.6	0	0	1	2	0	0	0	0
C03F11.7	0	0	2	1	0	1	0	0
C03F11.t1	2	0	0	1	1	1	0	0
C03G5.1	7501	5692	6388	7599	7161	8982	6633	7552
C03G5.10	4	1	4	2	23	27	7	24
C03G5.11	2	0	0	1	24	9	16	6
C03G5.12	0	0	0	0	1	0	0	0
C03G5.13	2	1	0	0	3	4	2	3
C03G5.2	0	3	1	1	13	10	7	10
C03G5.7	2813	2089	1973	2444	821	961	731	714
C03G5.8	8	6	8	16	40	30	19	34
C03G5.9	0	0	0	0	1	2	0	0
C03G6.1	1	1	9	10	0	0	2	4
C03G6.10	56	37	53	51	47	67	48	85
C03G6.11	3	1	0	2	1	0	0	1
C03G6.12	45	37	50	33	10	26	21	17
C03G6.13	4852	4517	3974	5566	1369	2606	1943	1997
C03G6.14	15	10	9	32	15	34	297	18
C03G6.15	258	237	204	271	389	530	751	293
C03G6.16	59	58	46	81	5	5	9	7
C03G6.17	1978	1541	1394	2007	204	346	210	246
C03G6.18	168	160	156	205	109	124	169	121
C03G6.19	624	546	551	608	314	434	563	396
C03G6.2	86	35	47	35	7	13	24	21
C03G6.20	6	8	6	0	4	1	6	2
C03G6.3	993	834	841	914	102	102	127	109
C03G6.5	884	841	757	801	353	408	310	328
C03G6.6	0	3	0	3	3	1	1	3
C03G6.7	5	5	1	6	0	3	6	4
C03G6.8	55	33	33	42	33	47	68	37
C03G6.9	1	2	1	4	0	0	0	4
C03H12.1	604	439	569	630	820	1025	900	869
C03H12.2	0	0	0	0	0	0	0	0
C03H12.3	0	0	0	0	0	0	0	0
C03H5.1	558	392	223	465	970	1009	588	729
C03H5.2	1970	1292	1346	1745	1714	1835	1494	1599
C03H5.3	1038	769	790	896	888	1327	971	1060
C03H5.4	22	7	10	20	3	1	4	11
C03H5.5	520	432	321	421	361	489	430	398
C03H5.6	1433	977	1064	1220	696	998	836	827
C03H5.7	274	227	213	256	21	40	46	35
C03H5.8	0	0	2	4	0	1	3	0
C04A11.1	265	157	227	258	154	200	206	181
C04A11.2	142	107	169	176	66	67	189	84
C04A11.3	1555	1168	1490	1633	1264	1696	1779	1501
C04A11.4	997	547	710	800	794	1045	1233	907
C04A11.5	97	112	76	78	10	8	22	12
C04A11.6	1	0	10	5	1	0	0	0
C04A11.7	0	0	0	1	0	0	0	0
C04A11.8	0	2	3	3	0	1	1	1
C04A11.t1	5	10	16	18	0	0	9	5
C04A2.1	443	406	335	389	346	468	353	326
C04A2.10	0	0	0	0	0	0	0	0
C04A2.11	3	1	1	3	2	1	0	0
C04A2.12	1	4	16	15	1	1	1	3
C04A2.13	0	0	0	1	0	0	0	1
C04A2.14	1	1	11	12	1	0	4	0
C04A2.3	9317	6386	6814	8096	3326	4751	4514	4412
C04A2.7	6472	5050	5236	6071	3734	5232	4821	4319
C04A2.8	0	1	5	2	0	0	0	1
C04A2.9	0	0	0	0	0	0	0	0
C04A2.t1	0	0	0	0	0	0	0	0
C04B4.1	3	3	0	12	0	1	1	0
C04B4.2	21	14	18	23	5	4	51	8
C04B4.3	1	1	4	2	1	1	3	1
C04B4.4	2	8	5	14	1	0	5	0
C04B4.5	1	1	1	2	0	0	0	1
C04B4.6	0	5	3	3	0	0	0	0
C04C11.1	72	41	49	67	28	70	36	52
C04C11.11	2	6	4	12	0	3	5	1
C04C11.12	0	0	0	0	0	0	0	0
C04C11.13	2	2	5	1	0	1	5	3
C04C11.14	0	0	1	0	0	0	0	0
C04C11.15	0	0	0	0	0	0	0	0
C04C11.16	0	0	0	0	0	0	0	0
C04C11.17	0	0	0	0	0	0	0	0
C04C11.18	8	13	27	29	0	0	10	15
C04C11.19	2	4	9	5	1	1	2	0
C04C11.2	3805	2797	2960	3543	2234	2899	2720	2411
C04C11.20	0	2	4	10	0	0	0	1
C04C11.21	0	0	2	3	0	0	0	0
C04C11.22	2	3	13	18	1	0	8	7
C04C11.4	0	1	0	1	0	0	1	0
C04C11.5	2	1	3	1	0	0	1	0
C04C11.6	0	0	0	0	0	0	0	0
C04C11.7	0	0	0	3	0	0	0	0
C04C11.8	0	0	0	0	0	0	0	0
C04C11.9	0	0	0	2	3	0	0	0
C04C11.t1	0	0	0	0	0	0	0	0
C04C3.1	21	28	30	37	6	7	10	11
C04C3.10	1	0	0	1	0	0	1	0
C04C3.11	0	0	0	0	0	0	0	0
C04C3.12	0	0	1	0	0	0	2	0
C04C3.13	1	0	0	1	0	0	0	0
C04C3.2	118	122	124	131	41	73	55	69
C04C3.3	6211	5388	5148	6300	7364	8869	6139	7379
C04C3.4	0	0	3	0	0	0	0	0
C04C3.5	354	231	260	352	122	111	125	123
C04C3.6	50	59	73	60	13	30	22	22
C04C3.7	8	6	8	15	0	0	4	3
C04C3.8	0	0	0	0	0	0	0	0
C04C3.9	5	3	5	10	3	0	1	1
C04D8.1	10253	7267	7484	9070	4116	5721	5128	4917
C04D8.2	13	16	10	15	0	0	5	4
C04D8.3	7	3	15	28	0	0	11	4
C04D8.4	4	1	4	3	1	3	2	4
C04D8.5	7	1	3	8	0	2	3	1
C04E12.1	3	12	8	14	2	6	1	6
C04E12.10	12	13	19	10	4	4	3	1
C04E12.11	74	58	41	47	39	46	25	51
C04E12.12	266	146	203	234	116	121	94	119
C04E12.2	917	837	735	795	93	70	54	62
C04E12.4	3014	2587	2138	2267	251	371	244	282
C04E12.5	113	95	75	82	27	16	13	14
C04E12.6	6	3	7	10	8	7	1	3
C04E12.7	40	21	33	40	16	8	14	14
C04E12.8	6	9	22	4	1	6	1	3
C04E12.9	2	5	7	7	1	3	5	1
C04E6.10	2	8	6	7	3	8	4	9
C04E6.11	677	574	529	684	1291	1740	1061	1374
C04E6.12	32	14	16	27	73	84	61	63
C04E6.13	465	371	314	427	99	178	130	118
C04E6.14	5	1	2	10	1	3	2	1
C04E6.2	76	37	27	60	4	10	9	9
C04E6.3	1	2	1	2	0	0	4	1
C04E6.4	1	4	7	13	0	1	5	4
C04E6.5	17	15	8	17	4	8	9	5
C04E6.6	38	28	35	41	9	31	26	19
C04E6.7	549	451	411	485	185	245	219	221
C04E6.8	45	25	30	30	12	37	27	61
C04E6.9	2	2	6	7	2	3	9	5
C04E7.1	2	3	14	24	1	2	1	5
C04E7.2	610	430	537	577	504	601	500	531
C04E7.3	833	571	677	810	211	340	275	284
C04E7.4	1395	1138	1140	1130	394	505	357	402
C04E7.5	0	1	6	3	1	0	2	0
C04E7.6	0	0	0	3	0	0	0	0
C04E7.7	0	0	0	0	0	0	0	0
C04E7.t1	0	0	0	0	0	0	0	0
C04F1.1	1	0	0	0	72	89	56	64
C04F1.3	806	555	586	724	265	409	483	372
C04F1.4	5	10	10	7	7	4	5	6
C04F1.5	12	6	10	7	1	1	5	3
C04F12.1	519	385	445	455	335	371	490	384
C04F12.10	2183	1795	1724	2074	1795	2294	1905	1824
C04F12.12	10	8	67	67	0	2	24	13
C04F12.13	2	4	0	7	0	1	3	1
C04F12.14	0	1	2	2	1	0	0	0
C04F12.15	2	0	4	3	0	0	1	1
C04F12.3	1783	1302	1279	1467	463	704	914	536
C04F12.4	34079	25125	23522	31460	32751	38368	26047	30364
C04F12.5	169	126	129	175	91	114	91	100
C04F12.6	17	7	88	97	0	8	22	40
C04F12.7	31	37	62	81	5	14	31	24
C04F12.8	742	619	613	778	178	269	318	296
C04F12.9	17	20	15	29	26	28	34	26
C04F12.t1	0	0	0	0	0	0	0	0
C04F2.1	9	15	14	27	1	8	8	6
C04F2.2	49	34	19	42	8	8	15	21
C04F2.3	34	24	22	25	15	14	12	13
C04F2.4	40	35	25	34	4	18	9	9
C04F2.5	57	37	60	52	0	8	4	13
C04F2.6	0	0	0	0	0	0	0	0
C04F2.t1	0	0	0	0	0	0	0	0
C04F5.1	468	353	399	469	375	447	427	425
C04F5.10	0	0	1	0	0	0	0	0
C04F5.2	14	12	6	11	2	7	2	3
C04F5.3	168	162	148	168	92	95	109	103
C04F5.4	2	1	2	8	1	0	3	3
C04F5.5	6	9	8	9	1	7	7	2
C04F5.6	38	28	13	20	8	6	30	4
C04F5.7	33	52	16	102	211	343	341	201
C04F5.8	729	598	643	653	823	1043	720	783
C04F5.9	546	475	446	494	297	320	316	312
C04F6.1	2	5	9	7	0	0	4	4
C04F6.2	103	48	57	89	61	108	69	54
C04F6.3	6297	2752	3554	5846	386	612	3744	572
C04F6.4	938	725	819	946	1648	2156	1934	1682
C04F6.5	110	107	175	137	722	796	776	624
C04F6.7	58	39	78	123	7	21	123	35
C04F6.8	0	0	2	3	0	0	2	0
C04G2.1	305	248	191	268	70	112	99	100
C04G2.10	17	17	16	20	8	15	5	3
C04G2.11	44	22	19	10	3	13	12	13
C04G2.12	4	6	9	7	2	1	1	0
C04G2.13	0	0	0	0	0	0	0	0
C04G2.2	13	13	25	29	1	3	14	2
C04G2.3	0	0	2	0	0	0	1	0
C04G2.4	0	0	0	1	0	1	0	0
C04G2.5	0	3	3	7	1	0	0	1
C04G2.6	1842	1324	1458	1550	2038	2973	2382	2518
C04G2.7	290	174	229	229	171	215	240	178
C04G2.8	5	0	9	12	2	4	7	8
C04G2.9	3	8	20	35	1	4	8	5
C04G6.1	831	557	517	698	514	818	595	674
C04G6.10	4	4	18	15	82	69	66	76
C04G6.11	2	2	1	3	0	0	1	2
C04G6.12	7	2	5	2	0	2	0	2
C04G6.13	4	10	1	2	2	0	8	3
C04G6.14	0	0	0	0	0	0	0	0
C04G6.2	7	7	9	28	29	27	40	28
C04G6.3	6376	4707	5158	5554	3407	4311	4194	3923
C04G6.4	836	682	727	855	630	788	737	621
C04G6.5	46	31	28	39	30	22	43	44
C04G6.6	18	11	22	38	19	30	19	25
C04G6.7	5	5	17	13	105	100	67	97
C04H4.1	26	12	19	23	4	12	8	9
C04H4.2	0	0	0	0	0	0	0	0
C04H4.3	0	1	2	2	0	0	0	0
C04H4.4	2	3	2	10	1	0	0	1
C04H4.5	2	3	2	8	0	0	0	0
C04H4.6	0	0	0	0	0	0	0	0
C04H5.1	720	555	486	576	851	1285	882	1046
C04H5.10	1	0	0	0	0	0	0	0
C04H5.2	17	16	36	49	4	5	18	17
C04H5.3	168	122	376	741	26	78	141	111
C04H5.6	1597	917	1218	1499	1429	1907	1617	1559
C04H5.7	4	4	10	12	0	0	2	1
C04H5.8	391	334	310	410	143	193	134	159
C04H5.9	16	14	37	19	3	5	12	14
C05A2.1	2578	1787	1732	2171	688	1104	866	936
C05A2.2	1	1	9	6	0	0	0	1
C05A2.3	7	4	8	11	1	1	5	5
C05A9.1	1450	948	998	1223	182	311	867	270
C05A9.10	0	0	0	0	0	0	0	0
C05A9.11	1	2	2	1	0	4	1	1
C05A9.2	987	736	842	853	796	1103	963	856
C05A9.3	0	4	1	0	0	0	1	1
C05A9.4	0	0	0	0	0	0	1	0
C05A9.5	0	0	0	0	0	0	0	0
C05A9.6	0	0	1	0	0	0	0	0
C05A9.7	1	0	0	3	0	0	0	0
C05A9.9	0	0	0	0	0	0	0	0
C05B10.1	923	681	700	824	458	500	506	492
C05B10.10	0	0	0	0	0	0	0	0
C05B10.11	0	0	0	0	0	0	0	0
C05B10.12	0	0	0	0	0	0	0	0
C05B10.13	0	1	0	0	0	0	0	2
[truncated: 42,969 more rows]

## Sheet: Webster2018_diffExpAnalysis
sequence	logFC	logCPM	PValue	FDR	WB_id	symbol
C04G2.11	0.876078	-0.425892	0.130351	0.190248	WBGene00007310	irld-21
C17E7.10	2.62081	-1.3487	0.000474352	0.00125704	WBGene00015904	irld-22
C30G4.6	1.36063	0.824855	0.0485386	0.0818399	WBGene00016271	irld-23
C31E10.3	1.28113	0.103816	0.00226315	0.00531828	WBGene00007844	irld-24
C41G6.6	2.89014	-1.17069	6.21986e-05	0.000187997	WBGene00008057	irld-25
D2063.4	1.77901	-1.88681	0.0231921	0.0429672	WBGene00044529	irld-1
F02C12.4	1.07321	1.65515	0.0003963	0.00106352	WBGene00008518	irld-2
F02C9.4	0.49058	-1.56946	0.472261	0.557611	WBGene00017175	irld-3
F11A5.7	3.11628	-2.65144	0.0111418	0.0223882	WBGene00008675	irld-26
F13G11.2	1.90177	-2.79175	0.0988744	0.150476	WBGene00008772	irld-4
F14D2.17	1.73593	1.26838	0.000757306	0.00193345	WBGene00077751	irld-27
F14D2.6	1.98304	0.636565	0.000109777	0.000320908	WBGene00017454	irld-5
F15E11.11	1.73371	-2.60928	0.15945	0.225649	WBGene00017497	irld-32
F15E11.2	1.12155	-2.84418	0.309442	0.394346	WBGene00017491	irld-28
F15E11.3	2.38171	-2.94936	0.0708124	0.113128	WBGene00017492	irld-29
F15E11.4	1.28542	-0.566059	0.0207181	0.0388652	WBGene00017493	irld-30
F28H7.6	0.781036	2.66636	0.00224144	0.00527702	WBGene00009239	irld-6
F38A5.11	1.51667	-2.94739	0.258547	0.33862	WBGene00018168	irld-7
F42G8.9	2.15407	-0.652503	0.000309112	0.000844769	WBGene00018360	irld-8
F45C12.1	1.24134	0.742019	0.00150354	0.0036545	WBGene00018432	irld-33
F45C12.16	0.644563	-0.49983	0.237941	0.315955	WBGene00018447	irld-9
F54G8.1	1.23732	2.47521	4.11637e-07	1.58394e-06	WBGene00010074	irld-34
F56A4.9	1.71939	-0.872297	0.00350072	0.00787859	WBGene00018917	irld-35
F58E1.4	2.57755	-0.489121	2.07066e-05	6.63885e-05	WBGene00019036	irld-36
F58E1.7	-0.256327	-1.62679	0.803455	0.853354	WBGene00019038	irld-37
F59D6.4	1.77086	-0.584084	0.00606112	0.0129408	WBGene00019106	irld-38
H25K10.5	2.15787	-1.6552	0.00299128	0.00683543	WBGene00010414	hpa-1
H25K10.6	0.997162	-1.37925	0.233107	0.310671	WBGene00010415	irld-39
K04F1.10	0.83128	0.860735	0.0180815	0.034447	WBGene00019389	irld-40
K04F1.12	1.83514	1.53845	7.0081e-07	2.63856e-06	WBGene00019391	irld-11
K04F1.13	1.81297	-0.628902	0.00100748	0.00251685	WBGene00019392	irld-44
K04F1.14	0.060017	0.624012	0.895025	0.927246	WBGene00019393	irld-45
K04F1.7	0.709332	-0.850398	0.19675	0.269532	WBGene00019386	irld-42
K12D9.14	0.943293	-1.4335	0.160088	0.226417	WBGene00077758	irld-12
T01C3.5	0.67103	-2.23208	0.480364	0.565565	WBGene00011322	irld-14
T05A6.4	0.670329	-1.01687	0.483595	0.568562	WBGene00011458	irld-47
T11F1.2	1.28818	-0.0372258	0.0414461	0.071306	WBGene00020428	irld-48
T11F1.6	2.10921	-0.85086	0.00488328	0.0106395	WBGene00020430	irld-49
T11F1.7	0.932779	0.240697	0.110206	0.164915	WBGene00020431	irld-50
T11F1.8	1.60653	-0.415044	0.00619971	0.013207	WBGene00020432	hpa-2
T11F1.9	2.44968	-1.32725	0.000929467	0.00233544	WBGene00077759	irld-51
T26E4.1	1.41916	-0.0541881	0.00251456	0.00583992	WBGene00012043	irld-52
Y19D10A.7	2.05634	-1.04694	0.00143733	0.0035061	WBGene00021222	irld-53
Y19D10B.3	2.77162	-1.23381	0.00025312	0.000701205	WBGene00021232	irld-15
Y37A1B.8	1.37569	-0.864827	0.0209051	0.0391683	WBGene00012541	irld-55
Y37A1B.9	1.02246	0.272095	0.0622113	0.101402	WBGene00012542	irld-56
Y46H3D.4	-0.522681	0.0580939	0.410557	0.497615	WBGene00021609	irld-17
Y57G11B.7	2.23928	-3.00731	0.115479	0.171606	WBGene00013299	irld-18
Y6E2A.8	2.44115	-2.04184	0.016861	0.0323908	WBGene00012401	irld-57
Y73F8A.18	1.20208	-1.42606	0.111368	0.166328	WBGene00013525	irld-59
ZC482.2	1.57525	-0.541693	0.00614119	0.0130922	WBGene00013911	irld-60
ZC482.3	1.65654	0.214083	0.000724548	0.00185504	WBGene00013912	irld-19
ZC482.4	1.57298	-0.39523	0.00313443	0.00712492	WBGene00013913	irld-61
ZC482.7	1.98164	-1.3881	0.00437631	0.00962737	WBGene00013915	irld-20
ZK1037.1	3.09597	-1.38696	3.30662e-05	0.000103677	WBGene00014190	irld-62
ZK355.1	1.5854	0.36294	0.0203101	0.0381511	WBGene00022711	irld-63
ZK355.4	1.72356	-0.217273	0.00217552	0.00513707	WBGene00022714	irld-64
ZK355.5	0.826419	1.05453	0.122585	0.180644	WBGene00022715	irld-65
ZK355.6	1.10326	0.394311	0.0802961	0.125986	WBGene00022716	irld-66
ZK355.7	0.517972	-1.1853	0.438016	0.523964	WBGene00044369	irld-67

## Sheet: Cao2017_TPM
gene_id	symbol	Germline	Intestinal/rectal_muscle	Coelomocytes	Ciliated_sensory_neurons	Seam_cells	Non-seam_hypodermis	Pharyngeal_epithelia	Touch_receptor_neurons	Body_wall_muscle	Cholinergic_neurons	Distal_tip_cells	Vulval_precursors	Other_interneurons	GABAergic_neurons	Am/PH_sheath_cells	Pharyngeal_muscle	Pharyngeal_neurons	Oxygen_sensory_neurons	Somatic_gonad_precursors	flp-1(+)_interneurons	Canal_associated_neurons	Pharyngeal_gland	Sex_myoblasts	Excretory_cells	Socket_cells	Rectum	Intestine
WBGene00044529	irld-1	0.561	0	0	0	0	0	0	0	0.271	0	2.477	0	0	0	0	0	0	0	0	0	0	0	0	0	0	0	0
WBGene00019391	irld-11	0.073	0	0	43.274	0.118	0	0	0	0.142	0	0	0	0	0	0	0	0	0	0	0	0	0	0	0	0	0	0
WBGene00077758	irld-12	0.392	0	0	5.207	0	0	0	0	0.166	0	0	0	0	0	0	0	0	0	0	0	0	0	0	0	0	0	1.333
WBGene00019845	irld-13	0.165	0	6.061	63.127	0	0	0	0	0.472	0	0	0	0	0	0.896	0	0	0	0	0	0	0	0	25.981	2.004	0	0
WBGene00011322	irld-14	0.049	0	0	0	0	0	0	0	0.217	0	0	0	0	0	0	0	0	0	0	0	0	0	0	0	0	0	0
WBGene00021232	irld-15	0.122	0	0	82.436	0	0	0	0	0	0	0	0	0	0	0.896	0	0	0	0	0	0	0	0	0	0	0	0
WBGene00021609	irld-17	0.056	0	0	0	0	0	1.896	0	0.085	0	0	0.668	0	0	0	0	0	0	0	0	0	0	0	0	0	0	0
WBGene00013299	irld-18	0	0	0	0	0	0	0	0	0	0	0	0	0	0	0	0	0	0	0.826	0	0	0	0	0	0	0	0
WBGene00013912	irld-19	0.418	2.405	0	0	1.02	0	0	0	0	0	0	0	0	0	0	0	0	0	0	0	0	0	0	0	0	0	0
WBGene00008518	irld-2	0.392	0	0.665	122.329	0	0.81	0	0	0.671	0	0	0	0	0	0	0	5.738	0	1.156	0	0	0	0	0	0	0	0
WBGene00013915	irld-20	0.315	0.599	0.734	0	0	0.649	0	0	0.242	0	0	0	0	0	0	0	0	0	0	0	0	0	0	0	0	0	0
WBGene00007310	irld-21	1.581	0	0	8.455	4.382	0	0	0	0.15	0.89	0	1.469	0	0	0	0	0	0	1.315	0	0	0	3.653	0	0	17.614	0
WBGene00015904	irld-22	0	0	0	0	0	0	0	0	0	0	0	0	0	0	7.568	0	0	0	0	0	0	0	0	0	0	0	0
WBGene00016271	irld-23	5.182	0	11.661	7.289	2.338	0.378	0	0	0.384	0	0	0	0	12.255	0	6.21	0	0	1.86	0	0	0	0	15.664	15.433	0	0
WBGene00007844	irld-24	0	0	2.391	99.468	0.197	0	0.758	0	0.192	0	0	0	0	0	0	0	0	0	0	0	0	0	0	0	0	0	1.046
WBGene00008057	irld-25	0	0	0	0	0.136	0	0	0	0.133	0	0	0	0	0	0	0	0	0	0	0	0	0	0	0	0	0	0
WBGene00008675	irld-26	0	0	0	0	0	0	0	0	0.042	0	0	0	0	0	0	0	0	0	0	0	0	0	0	0	0	0	0
WBGene00077751	irld-27	0	0	0	19.442	1.041	0	0	0	0.539	0	0	0	0	0	5.168	0.68	0	0	0	0	0	0	0	0	0	0	0.188
WBGene00017491	irld-28	0	0	0	0	0	0	0	0	0.043	0	0	0	0	0	0	0	0	0	0	0	0	0	0	0	0	0	0
WBGene00017492	irld-29	0	0	0	0	0	0.613	0	0	0.064	0	0	0	0	0	0	0	0	0	0	0	0	0	0	0	0	0	0
WBGene00017175	irld-3	0.048	0	0	0	0	0	0	0	0.201	0	0	0	0	0	0	0	0	0	0	0	0	0	0	0	0	0	0
WBGene00017493	irld-30	0	0	0	19.905	0	0	0	0	0.094	0	0	0	0	0	0	10.067	0	0	0	0	0	0	0	0	0	0	0
WBGene00017497	irld-32	0.285	0	0	6.526	0	0	0	0	0.483	0	0	0	4.983	0	0	0	0	0	0	0	0	0	0	0	0	0	0
WBGene00018432	irld-33	0.051	0	0	0	0.128	0	0	0	0.119	0	0	0	0	0	0	0	0	0	0	0	0	0	0	0	0	1.894	0
WBGene00010074	irld-34	0	0	0	60.34	0	0	0	0	0.645	0	0	0	0	0	0	2.272	0	0	0	0	0	0	0	0	0	0	0
WBGene00018917	irld-35	0	0	0	0	0	0	0	0	0	0	0	0	0	0	0	0	0	0	0	0	0	0	0	0	0	0	0
WBGene00019036	irld-36	0.113	0	0	0	0	0	0	0	0	0	0	0	0	0	0	0	0	0	0	0	0	0	0	0	0	0	0
WBGene00019038	irld-37	0	0	0	0	0.218	0	0	0	0.189	0	0	0	0	0	0	15.228	0	0	0	0	0	0	0	0	0	0	0
WBGene00019106	irld-38	0.345	1.611	0	68.816	2.016	0	0	0	1.49	4.458	0	5.939	0	0	1.371	0	0	0	0	0	0	0	0	0	0	0	7.34
WBGene00010415	irld-39	0	0	0	5.412	0.264	0	0	0	0.516	0	5.82	1.25	0	0	0	0	0	0	0	0	0	0	0	0	0	0	0.564
WBGene00008772	irld-4	0.067	0	0	0	0	0	0	0	0.026	0	0	0	0	0	0	0	0	0	0	0	0	0	0	0	0	0	0
WBGene00019389	irld-40	0.188	0	0	44.004	0	0	0	0	0.121	0	0	0	0	0	0	0	0	0	0	0	0	0	0	0	0	0	0
WBGene00019386	irld-42	0.056	0	0	4.969	0.159	0	0	0	0.217	0	0	0	0	0	0	0	0	0	0	0	0	0	0	0	0	0	0
WBGene00019392	irld-44	0.126	0	0	5.751	0	0	0	10.542	0	0	0	0	0	9.158	0	0	0	0	0	0	0	0	0	0	0	0	0
WBGene00019393	irld-45	0	0	0	45.479	0	0	0	0	0	0	0	0	6.581	0	0	0	0	0	0	0	0	0	0	0	0	0	0
WBGene00011458	irld-47	0.114	0	0	0	0	0.265	0	0	0.501	0	0	0	0	0	0	0	0	0	0	0	0	0	0	0	0	0	0.894
WBGene00020428	irld-48	0	0	0	0	0.108	0	0	0	0.203	0	0	0	0	0	0	0	0	0	0	0	0	0	0	0	0	0	0
WBGene00020430	irld-49	0.021	0	0	5.55	1.116	0	0	0	0.275	0	0	0	0	0	0	0	0	0	0	0	0	0	0	0	0	0	0
WBGene00017454	irld-5	0	0	0	0	0	0.194	0	0	0.026	0	0	0	0	0	0	0	11.539	0	0	0	0	0	0	0	0	0	0
WBGene00020431	irld-50	0	0	0	5.29	0.312	0	0	0	0.064	0	0	0	0	0	0	0	0	0	0	0	0	0	0	0	0	0	0
WBGene00077759	irld-51	0.065	0	0	19.468	1.501	0	9.049	0	0.575	5.092	0	0	0	0	0	0	0	0	0.972	0	0	0	0	0	0	0	6.513
WBGene00012043	irld-52	0	2.188	0	0	0.251	0.592	0	0	0.122	0	0	0	0	0	0	0	0	0	0	0	0	0	0	0	0	0	0
WBGene00021222	irld-53	0	0	0	0	0.187	0	0	0	0	0	0	0	0	0	0	0	0	0	0	0	0	0	0	0	0	0	0
WBGene00012541	irld-55	0.626	0	0	24.743	0	0	1.257	0	0.555	0	0	0	0	0	0	0	0	0	0	0	0	5.996	0	0	0	0	0
WBGene00012542	irld-56	0.102	0	0	2.977	1.246	3.132	0	0	0.106	0	0	0	0	0	0	0	0	0	0	0	0	0	0	0	0	0	0
WBGene00012401	irld-57	0	0	0	0	0	0	0	0	0.211	0	0	4.066	0	16.556	0	0	0	0	0	0	0	0	0	0	0	0	0
WBGene00013494	irld-58	0.267	0	0	0	0	0	0	0	0	0	0	0	0	0	0	0	0	0	0	0	0	0	0	0	0	0	1.504
WBGene00013525	irld-59	0	0	0	0	0	0	0	9.045	0.064	0	0	0	0	0	0	0	0	0	0	0	0	0	0	0	0	0	0.878
WBGene00009239	irld-6	0	0	0	0	0.651	5.5	0	0	0.027	0	0	3.669	0	0	0	54.6	0	0	0	0	0	0	0	17.413	0	0	0
WBGene00013911	irld-60	0.082	0	0	4.931	0	0	0	0	0.06	0	0	0	0	0	0	0	0	0	0	0	0	0	0	0	0	0	0
WBGene00013913	irld-61	0.645	0	0	10.987	0.304	0	0	0	0.08	0	0	0	0	0	0	0	0	0	0.777	0	0	0	0	0	0	0	0
WBGene00014190	irld-62	0	0	4.782	1.301	0	0	0	0	0.304	0	0	0	0	0	0	0	0	0	0	0	0	0	0	0	0	0	0
WBGene00022711	irld-63	0	0	0	3.093	0.372	0.428	0	0	0.032	0	0	0	0	0	0	0	0	0	0	0	0	0	0	0	0	0	0
WBGene00022714	irld-64	0	0	0	0	0.18	0	0	0	0.094	0	0	0	0	0	0	0	0	0	0	0	0	0	0	0	0	0	0
WBGene00022715	irld-65	0	0	0	0	0.098	0	0	0	0.35	8.797	0	3.608	0	0	0	0	0	16.581	0	0	0	0	0	0	0	0	0
WBGene00022716	irld-66	0.118	0	1.397	0	0	1.669	3.782	0	0.517	0	0	0	0	0	0	0	0	0	0	0	0	0	1.362	0	0	0	0
WBGene00044369	irld-67	0	0	0	0	0.27	0	0	0	0	0	0	0	0	0	0	0	0	0	0	0	0	0	0	0	0	0	0
WBGene00018168	irld-7	0	0	0	0	0.076	0	0	0	0.109	0	0	0	0	0	0.603	0	0	0	0	0	0	0	0	0	0	0	0
WBGene00018360	irld-8	0.719	0	2.023	0	0.5	0.954	0	0	0.343	0	0	0	0	0	0	0	0	0	0	0	0	0	0	0	0	0	0
WBGene00018447	irld-9	0.024	0	0	0	0.066	0	0	0	0.216	0	0	0	0	0	0	0.337	0	0	0	0	0	0	0	0	0	0	0
WBGene00010414	hpa-1	0	0	0	0	0	0	0	0	0.031	7.819	0	0	0	0	0	0	0	0	0	0	0	0	0	0	0	0	0
WBGene00020432	hpa-2	0.196	0	0	0	0	0	0	0	0.173	0	0	0	0	0	0	0	0	0	1.386	0	0	0	0	0	2.297	0	0.898
WBGene00000898	daf-2	388.693	231.268	245.706	1956.91	303.45	222.743	241.57	242.72	141.388	445.168	466.12	493.892	505.133	486.112	254.331	271.036	708.937	952.632	300.163	371.078	577.511	479.956	315.557	348.444	207.357	283.309	555.663

## Sheet: Taylor2021_TPM
gene_name	Wormbase_ID	ADA	ADE	ADF	ADL	AFD	AIA	AIB	AIM	AIN	AIY	AIZ	ALA	ALM	ALN	AQR	AS	ASEL	ASER	ASG	ASH	ASI	ASJ	ASK	AUA	AVA	AVB	AVD	AVE	AVF	AVG	AVH	AVJ	AVK	AVL	AVM	AWA	AWB	AWC_OFF	AWC_ON	BAG	BDU	CAN	CEP	DA	DA9	DB	DB01	DVA
irld-10	WBGene00019107	0	0	0	0	0	0	0	0	0	0	0	0	0	0	0	0	0	0	0	0	0	218.007	0	0	0	0	0	0	0	0	0	0	0	0	0	0	0	0	0	0	0	0	0	0	0	0	0	0
irld-11	WBGene00019391	0	0	101.099	0	0	0	0	0	0	0	0	0	0	0	0	0	0	0	253.729	113.512	0	0	209.48	0	0	0	0	0	0	0	0	0	0	0	0	0	0	0	0	0	0	0	0	0	0	0	0	0
irld-12	WBGene00077758	0	0	0	0	0	0	0	0	0	0	0	0	0	0	0	0	0	0	0	0	0	163.636	0	0	0	0	0	0	0	0	0	0	0	0	0	0	0	0	0	0	0	0	0	0	0	0	0	0
irld-13	WBGene00019845	0	0	0	0	0	0	0	0	0	3.70563	0	0	0	0	0	0	0	0	0	0	0	63.4225	0	0	0	0	0	0	0	0	0	0	0	0	0	0	0	0	0	0	0	0	0	0	0	0	0	8.993
irld-15	WBGene00021232	0	0	23.7742	46.6544	62.5977	0	0	0	0	0	0	0	0	0	0	0	0	45.6816	169.366	0	208.753	21.7904	0	0	0	0	0	0	0	0	0	0	0	0	0	0	0	0	0	0	0	0	0	0	0	0	0	0
irld-19	WBGene00013912	0	0	0	0	0	0	0	0	0	0	0	0	0	0	0	0	0	0	0	0	0	75.7202	0	0	0	0	0	0	0	0	0	0	0	0	0	0	0	0	0	0	0	0	0	0	0	0	0	0
irld-2	WBGene00008518	0	0	91.1244	0	0	0	0	0	0	0	0	0	0	0	0	0	0	0	27.7036	12.696	80.1403	105.365	64.2044	0	0	0	0	0	0	0	0	0	0	0	0	0	0	0	0	0	0	0	0	0	0	0	0	0
irld-20	WBGene00013915	0	0	0	0	0	0	0	0	0	0	0	0	0	0	0	0	0	0	0	0	0	10.0728	0	0	0	0	0	0	0	0	0	0	0	0	0	0	0	0	0	0	0	0	0	0	0	0	0	0
irld-21	WBGene00007310	0	0	0	0	0	0	0	0	0	0	0	0	0	0	0	0	0	0	0	0	0	204.105	0	0	0	0	0	0	0	0	0	0	0	0	0	0	0	0	0	0	0	0	0	0	0	0	0	0
irld-23	WBGene00016271	0	0	0	0	0	0	0	0	0	0	0	0	0	0	0	0	0	0	0	0	0	30.1226	0	0	0	0	0	0	0	0	0	0	0	0	0	0	0	0	0	0	0	0	0	0	0	0	0	0
irld-24	WBGene00007844	0	0	0	0	0	0	0	0	0	0	0	0	0	0	0	0	0	0	0	0	0	260.913	0	0	0	0	0	0	0	0	0	0	0	0	0	0	94.4438	0	0	0	0	0	0	0	0	0	0	0
irld-25	WBGene00008057	0	0	0	9.04856	0	0	0	0	0	0	0	0	0	0	0	0	0	0	0	10.0648	0	44.3329	0	0	0	0	0	0	0	0	0	0	0	0	0	0	0	0	0	0	0	0	0	0	0	0	0	0
irld-27	WBGene00077751	0	0	0	0	0	0	0	0	0	0	0	0	0	0	0	0	0	0	0	0	0	21.7758	0	0	0	0	0	0	0	0	0	0	0	0	0	0	0	0	0	0	0	0	0	0	0	0	0	0
irld-3	WBGene00017175	0	0	0	0	0	0	0	0	0	0	0	0	0	0	0	0	0	0	0	0	0	0	0	0	0	0	0	0	0	0	0	0	0	0	0	0	0	0	0	0	0	0	0	0	0	0	0	0
irld-30	WBGene00017493	0	0	0	159.009	0	0	0	0	0	0	0	0	0	0	0	0	0	0	0	0	0	0	0	0	0	0	0	0	0	0	0	0	0	0	0	0	0	0	0	0	0	0	0	0	0	0	0	0
irld-31	WBGene00017494	0	0	0	90.6072	0	0	0	0	0	0	0	0	0	0	0	0	0	0	0	0	0	0	0	0	0	0	0	0	0	0	0	0	0	0	0	0	0	0	0	0	0	0	0	0	0	0	0	0
irld-33	WBGene00018432	0	0	0	0	0	0	0	0	0	0	0	0	0	0	0	0	0	0	0	0	0	42.3957	0	0	0	0	0	0	0	0	0	0	0	0	0	0	0	0	0	0	0	0	0	0	0	0	0	0
irld-34	WBGene00010074	0	0	681.934	188.182	0	0	0	0	0	0	0	0	0	0	0	0	0	0	463.445	169.839	0	0	0	0	0	0	0	0	0	0	0	0	0	0	0	0	0	0	0	0	0	0	0	0	0	0	0	0
irld-38	WBGene00019106	0	0	0	38.4827	0	0	0	0	0	0	0	0	0	0	0	0	0	0	0	0	0	600.956	0	0	0	0	0	0	0	0	0	0	0	0	0	0	0	0	0	0	0	0	0	0	0	0	0	0
irld-39	WBGene00010415	0	0	0	0	0	0	0	0	0	0	0	0	0	0	8.33717	0	0	0	0	0	0	39.6974	0	0	0	0	0	0	0	0	0	0	0	0	0	0	0	0	0	0	0	0	0	0	0	0	0	0
irld-40	WBGene00019389	0	0	0	145.418	0	0	0	0	0	0	0	0	0	0	0	0	0	0	0	0	0	0	0	0	0	0	0	0	0	0	0	0	0	0	0	0	0	0	0	0	0	0	0	0	0	0	0	0
irld-41	WBGene00019385	0	0	0	57.3808	0	0	0	0	0	0	0	0	0	0	0	0	0	0	0	0	0	0	0	0	0	0	0	0	0	0	0	0	0	0	0	0	0	0	0	0	0	0	0	0	0	0	0	0
irld-42	WBGene00019386	0	0	0	0	0	0	0	0	0	0	0	0	0	0	0	0	0	0	0	0	0	0	0	0	0	0	0	0	0	0	0	0	0	0	0	0	0	0	0	0	0	0	0	0	0	0	0	0
irld-44	WBGene00019392	0	0	0	0	0	0	0	0	0	0	0	0	0	0	0	0	0	0	0	0	0	61.8031	0	0	0	0	0	0	0	0	0	0	0	0	0	0	0	0	0	0	0	0	0	0	0	0	0	0
irld-45	WBGene00019393	0	0	0	0	0	0	0	0	0	0	0	0	0	0	0	0	0	0	0	0	0	254.655	0	0	0	0	0	0	0	0	0	0	0	0	0	0	0	0	0	0	0	0	0	0	0	0	0	0
irld-46	WBGene00019676	0	0	0	0	0	0	0	0	0	0	0	0	0	0	0	0	0	0	0	0	0	27.4655	0	0	0	0	0	0	0	0	0	0	0	0	0	0	0	0	0	0	0	0	0	0	0	0	0	0
irld-51	WBGene00077759	0	0	0	0	0	0	0	0	0	0	0	0	0	0	0	0	0	0	0	0	0	73.0043	0	0	0	0	0	0	0	0	0	0	0	0	0	0	0	0	0	0	0	0	0	0	0	0	0	0
irld-52	WBGene00012043	0	0	0	69.0301	0	0	0	0	0	0	0	0	0	0	0	0	0	0	0	0	0	0	0	0	0	0	0	0	0	0	0	0	0	0	0	0	0	0	0	0	0	0	0	0	0	0	0	0
irld-55	WBGene00012541	0	0	0	9.70047	0	0	0	0	0	0	0	0	0	0	0	0	0	0	0	0	0	7.82438	0	0	0	0	0	0	0	0	0	0	0	0	0	0	0	0	0	0	0	0	0	0	0	0	0	0
irld-56	WBGene00012542	0	0	0	0	0	0	0	0	0	0	0	0	0	0	0	0	0	0	0	0	0	7.03481	0	0	0	0	0	0	0	0	0	0	0	0	0	0	0	0	0	0	0	0	0	0	0	0	0	0
irld-58	WBGene00013494	0	0	0	16.0625	0	0	0	0	0	0	0	0	0	0	0	0	0	0	0	0	0	0	0	0	0	0	0	0	0	0	0	0	0	0	0	0	0	0	0	0	0	0	0	0	0	0	0	0
irld-6	WBGene00009239	0	0	0	0	0	0	0	0	0	0	0	0	0	0	0	0	0	0	0	0	0	0	0	0	0	0	0	0	0	0	0	0	0	0	0	0	137.027	0	0	0	0	0	0	0	0	0	0	0
irld-60	WBGene00013911	0	0	0	0	0	0	0	0	0	0	0	0	0	0	0	0	0	0	0	0	0	354.126	0	0	0	0	0	0	0	0	0	0	0	0	0	0	0	0	0	0	0	0	0	0	0	0	0	0
irld-61	WBGene00013913	0	0	0	0	0	0	0	0	0	0	0	0	0	0	0	0	0	0	0	0	0	20.7965	0	0	0	0	0	0	0	0	0	0	0	0	0	0	0	0	0	0	0	0	0	0	0	0	0	0
irld-62	WBGene00014190	0	0	0	17.0046	0	0	0	0	0	0	0	0	0	0	0	0	0	0	0	0	0	0	0	0	0	0	0	0	0	0	0	0	0	0	0	0	0	0	0	0	0	0	0	0	0	0	0	0
irld-65	WBGene00022715	0	8.94266	0	0	0	0	0	0	0	0	0	0	0	0	8.58462	0	0	0	0	0	0	11.93	0	0	0	0	0	0	0	0	0	0	0	0	0	0	0	0	0	0	0	0	0	0	0	0	3.20509	0
irld-8	WBGene00018360	0	0	0	0	0	0	0	0	0	0	0	0	0	0	0	0	0	0	0	0	0	0	0	0	0	0	0	0	0	0	0	0	0	0	0	0	0	0	0	0	0	21.6211	0	0	0	0	0	0
irld-9	WBGene00018447	0	0	0	0	0	0	0	0	0	0	0	0	0	0	0	0	0	0	0	0	0	36.9094	0	0	0	0	0	0	0	0	0	0	0	0	0	0	0	0	0	0	0	0	0	0	0	0	0	0
hpa-1	WBGene00010414	0	0	0	0	0	0	0	0	0	0	0	0	0	0	0	0	0	0	0	0	0	38.1887	0	0	0	0	0	0	0	0	0	0	0	0	0	0	0	0	0	0	0	0	0	0	0	0	0	0
daf-2	WBGene00000898	22.574	9.91011	9.74841	20.2322	12.7071	21.9774	8.11788	180.731	8.64252	19.6537	20.1163	10.0162	7.26048	0	53.023	40.1611	45.8616	15.2298	27.6204	12.4267	27.7975	14.096	30.3776	43.8215	14.5567	0	93.9316	0	76.3328	75.7425	24.6673	26.2572	0	47.9743	15.0549	15.1472	0	34.2266	11.2295	93.2102	32.8064	8.48343	9.83509	90.2314	0	37.413	23.9645	0
[truncated: 80 more columns]
